# Supplementary material for: Gene Expression Profiling Shows Medullary Breast Cancer Is a Subgroup of Basal Breast Cancers
Source: Oxford University Press journal article supplement (doi:10.1158/0008-5472.can-06-0031), 2006-05-01
Supplement: 00085472can060031-sup-supplementary_tables_1-4.xls [file 00085472can060031-sup-supplementary_tables_1-4.xls]

## Sheet: Suppl Table 1
Suppl. Table 1 : mRNA expression data of 27.243 filtered genes in 66 breast tumor samples.
	Name	10621	5771cc	5142cc	5186cc	5901cc	4186cc	4568cc	13018	13045	7412	8862	9345	10959	12235	10090	11756	11895	12635	12030	12698	5350	6238	10339	10502	10980	11245	10797	2933	5520	6202	8524	9077	9127	9725	9752	9941	9961	9966	6162	10003	6453	6972	10639	11442	11305	11350	10958	11485
	Age, years	40	44	74	78	54	69	38	54	45	42	37	63	64	31	52	63	37	33	43	77	50	48	75	74	47	63	61	63	65	60	64	40	52	46	42	44	71	62	71	44	na	50	62	50	69	51	70	54
	Pathological tumor size	pT1	pT1	pT2	pT2	pT1	pT2	pT1	pT1	pT2	pT2	pT2	pT1	pT2	na	pT2	pT1	pT3	pT2	pT2	pT2	pT2	pT2	pT2	pT3	pT2	pT2	pT2	pT1	pT1	pT1	pT3	pT3	pT2	pT3	pT2	pT2	pT1	pT1	pT2	pT2	na	pT3	pT2	pT2	pT3	pT3	pT1	pT2
	Pathological axillary lymph node	negative	positve	positve	NA	positve	positve	positve	negative	negative	positve	negative	negative	negative	negative	positve	negative	negative	negative	negative	negative	negative	negative	negative	negative	negative	negative	positve	positve	negative	negative	negative	negative	negative	positve	positve	negative	negative	negative	positve	positve	NA	positve	positve	negative	positve	positve	negative	negative
	Density of lymphocyte infiltrate	high	high	high	high	high	high	high	high	moderate	high	high	high	high	high	high	moderate	moderate	high	high	high	high	moderate	moderate	high	high	moderate	low	low	high	low	moderate	moderate	moderate	moderate	moderate	high	high	moderate	NA	moderate	NA	NA	low	moderate	low	moderate	moderate	low
	Angio-invasion	negative	NA	NA	NA	NA	NA	NA	negative	negative	negative	negative	negative	negative	negative	positve	negative	negative	negative	negative	negative	negative	negative	negative	negative	negative	negative	positve	positve	positve	negative	negative	negative	negative	negative	positve	positve	negative	negative	NA	positve	NA	NA	negative	negative	positve	positve	negative	positve
	ER status	negative	negative	negative	negative	negative	negative	negative	negative	negative	negative	negative	negative	negative	negative	negative	negative	negative	negative	negative	negative	negative	negative	negative	negative	negative	negative	negative	negative	negative	negative	negative	negative	negative	negative	negative	negative	negative	negative	negative	negative	negative	negative	negative	negative	positve	positve	positve	positve
	PR status	negative	negative	negative	negative	negative	negative	negative	negative	negative	negative	negative	negative	negative	negative	negative	negative	negative	negative	negative	positve	negative	negative	negative	negative	negative	negative	negative	negative	negative	negative	negative	negative	negative	negative	negative	negative	negative	negative	negative	negative	negative	negative	negative	negative	positve	positve	positve	positve
	ERBB2 status	NA	NA	NA	NA	NA	NA	NA	negative	negative	negative	negative	negative	negative	negative	negative	negative	negative	negative	negative	negative	negative	negative	negative	negative	negative	negative	positve	positve	positve	negative	negative	positve	negative	positve	negative	negative	negative	negative	negative	negative	negative	negative	positve	positve	negative	positve	positve	negative
	EGFR status	NA	NA	NA	NA	NA	NA	NA	NA	NA	positve	positve	NA	NA	NA	negative	NA	NA	NA	NA	NA	NA	positve	NA	NA	NA	NA	NA	positve	negative	positve	positve	positve	positve	NA	positve	positve	negative	negative	positve	positve	negative	NA	NA	NA	NA	NA	NA	NA
	P53 status	positve	NA	NA	NA	NA	NA	NA	negative	NA	positve	positve	negative	positve	positve	negative	positve	negative	positve	NA	positve	negative	negative	positve	positve	negative	positve	positve	positve	positve	positve	positve	negative	positve	negative	positve	positve	negative	negative	positve	positve	negative	positve	negative	NA	negative	NA	negative	NA
	KI67 status	positve	NA	NA	NA	NA	NA	NA	positve	NA	positve	positve	positve	positve	positve	positve	positve	positve	positve	NA	positve	positve	positve	positve	positve	positve	positve	positve	negative	positve	positve	positve	positve	positve	positve	positve	positve	positve	positve	positve	positve	positve	NA	positve	positve	positve	positve	positve	positve
	Pathological type	MBC	MBC	MBC	MBC	MBC	MBC	MBC	MBC	MBC	MBC	MBC	MBC	MBC	MBC	MBC	MBC	MBC	MBC	MBC	MBC	MBC	MBC	DBC	DBC	DBC	DBC	DBC	DBC	DBC	DBC	DBC	DBC	DBC	DBC	DBC	DBC	DBC	DBC	DBC	DBC	DBC	DBC	DBC	DBC	DBC	DBC	DBC	DBC
1552257_a_at	KIAA0153	291.81	401.28	778.43	227.51	379.66	322.88	253.39	197.78	356.71	662	237.01	436.94	330.99	129.9	225.36	613.73	342.78	304.57	964.29	327.59	489.75	346.74	385.91	319.64	238.15	288.41	489.82	292.85	248.07	428.8	365.52	259.96	259.79	259.59	182.57	267.4	329.36	248.35	127.52	504.93	288.98	501.72	192.39	353.86	855.67	213.61	203.66	514.07
1552426_a_at	BLP2	437.24	132.45	185.94	265.09	406.19	278.63	227.8	459.08	183.19	465.83	426.21	244.18	243.45	249.82	228.14	188.68	155.28	188.57	261.79	370.98	350.49	384.79	137.86	113.37	192.84	198.38	171.99	174.24	144.26	314.57	184.08	189.84	163.47	253.27	196.69	384.67	205.96	225.16	155.32	319.83	351.18	140.98	528.17	483.69	736.29	1104.91	185.62	162.59
1552621_at	POLR2J2	664.43	457.78	658.2	863.57	799.4	371.3	1216.59	626.01	1973.44	1314.56	409.68	366.94	679.11	774.77	780.22	804.76	719.67	1127.63	329.64	250.77	618.2	656.21	1068.1	859.44	435.49	774.29	1039.58	496.38	586.29	785.69	577.94	583.3	406.98	681.83	1064.54	887.95	768.52	764.1	1569.95	667.44	426.57	357.13	660.69	846.65	824	780.95	415.22	622.77
1553538_s_at	MTCO1	12649.2	12164.6	13097.9	13581.6	13988.5	11795	13443	14255.1	13189.4	14292.9	10366.9	13085	14131.7	13332.1	12242.7	12042.9	13879.4	13909.5	12615.4	12235.1	10813	13332.3	14565.8	14137.1	13418.8	14122	13865.3	12043.8	14003.1	9938.56	14260.7	11192.8	13630.7	12486.2	11797.2	12558.4	12669.5	11856.2	11657.9	14834.6	12211.5	13092	13346.4	13835.6	14646.8	12615.4	13165.7	12655.7
1553551_s_at	MTND2	11269.3	11585.7	10374.3	12062.1	12532.8	11430.8	13342.6	12420	9824.17	12342.2	9738.92	12549.9	12106.1	11725.2	9774.61	10954.5	13504.2	8789.95	13989.7	11455.5	9604.7	8531.79	6641.61	13313.3	13387.2	11592.6	10819.7	11670.7	13791	8094.14	11757.6	13376.2	13059.4	12936.9	8605.7	12400.5	11612.1	11481.3	5366.31	10275.6	12939.9	12779	12893.7	9359.88	11831.9	9165.87	11593	10805
1553567_s_at	MTATP6	12667.3	14851.3	14085.1	15083.2	13285.7	11453.1	17406.6	14191.7	14441.6	16465	13268.9	14489.1	15088	14064	11191.5	13052.5	17691.8	12960.2	17861.2	11163.9	11728.7	14807.3	14013.1	16324.3	15138.6	15976.5	14631.8	16186.1	17861.2	11051	15650.6	15023.4	15581.5	14565.5	10276.9	13528.6	15341.1	15590.4	11847.5	15242.8	15661.4	15235.1	17602.6	11268.4	15975.2	12841.7	14817.8	14807.3
1553569_at	MTCO2	12224.2	12142.4	13037.9	12794.7	13794.8	12751.7	13054.4	12476.2	12490.9	14221.6	11442.5	11935.2	13961.5	11917.5	10741	12056.5	14622.4	14296.6	14691.3	12857.3	11877.4	11420.6	12767.2	14218.3	14180.8	13402.6	12836	13100.8	14316.5	11217.4	13466.2	13538	13783	13195.7	11277.6	13241.8	13258.1	12139.6	9470.24	13640.4	14261	13025.3	15103.4	13065.8	13097.1	10195.4	12941.5	14318.5
1553570_x_at	MTCO2	13652.9	13271.5	13652.1	13711.4	14769.3	13480.8	13761.8	13303.8	13503.6	14737.9	12475.4	12928.3	14044.6	12435.9	11069.6	12924.1	15411.4	14632	15474.5	13858.8	12783.9	12842.8	13673.6	15068.8	15026.4	14154.7	13879.9	13909.7	15160.9	11734	14509.6	14212.6	14746.5	14631.6	12047.2	13755	14225.6	13503.9	10403.7	14943.9	15079.1	13780.5	15992.1	13674.4	13879.9	11067	14058.2	14788.3
1553588_at	MTND3	12293.9	14298.6	13353.2	14679.6	13610.3	14773.7	14785.3	14335	13082	15726.1	13501.9	14323	13602.8	13970.1	12654.4	12169.5	14638.1	13414.2	15843	15441.1	12341.3	12030.4	14443.1	15328.7	15362.3	15454.1	13726.6	15493.9	14609.3	12286.3	13094.8	14493	14738.2	15794.7	14202.5	14745.5	14465.3	14379.2	11774	14915.6	13669.2	15080	15712.6	11870.8	14596.2	12252.1	15103.2	14459.9
1553678_a_at	ITGB1	1308.89	764.48	622.31	1831.97	1019.13	1803.04	700.35	587.44	627.27	829.41	1485	986.31	1378.01	1599.98	1433.74	765.73	1284.78	1303.52	2027.71	829.68	916.21	1280.85	1109.36	1095.42	764.26	779.74	2261.76	1804.13	2372.15	1236.68	1660.43	1774.32	1284.65	1463.65	1093.53	1145.13	1263.49	1097.63	170.77	1620.78	556.52	1577.16	1561.97	961.15	428.16	987.31	1831.62	1768.55
1553703_at	FLJ90396	425.22	402.49	610.98	337.75	299.72	165.28	507.33	506.53	332.17	278.61	287.02	510.63	375.66	540.2	262.98	432.59	484.45	486.07	267.79	187.27	336.28	229.06	390.67	852.05	397.46	443.35	251.18	410.14	238.94	405.56	189.33	279.34	561.13	447.87	406.03	515.87	248.78	446.36	1324.46	260.07	716.23	241.19	320.26	572.98	648.93	325.71	257.72	283.2
1553704_x_at	FLJ90396	307.52	294.17	466.06	238.26	223.08	125.95	389.67	413.77	257.45	234.24	218.07	398.74	264.76	406.95	191.99	345.62	336.91	369.05	206.92	115.53	267.51	184.87	309.13	645.67	322.93	369.12	218.8	301.14	186.36	315.11	147.05	219.63	435.53	334.47	292.48	375.86	198.8	369.01	1099.19	198.67	547.03	160.64	233.29	450.84	537.97	244.37	197.32	204.61
1553906_s_at	FGD2	581.24	961.85	365.96	400.43	485.1	227.6	1162.01	342.75	853.02	199.92	1017.46	660.69	634.8	1097.98	908.82	806.07	225.4	501.06	544.81	695.95	379.6	324.37	434.67	202.68	516.18	292.81	388.12	315.96	355.83	805.54	216.3	287.45	329.28	482.34	550.61	871.7	870.49	356.81	4267.64	343.57	287.46	397.68	676.76	245.34	235.56	180.41	374.29	310.32
1553959_a_at	B3GALT6	336.41	214.38	603.95	279.71	280.5	296.75	381.99	240.29	227.69	460.72	245.92	360.5	215.2	203.28	208.23	233.69	288.12	227.17	479.17	322.35	324.14	239.9	252.56	262.7	592.02	167.18	148.07	230.33	159.02	353.77	241.07	269.33	235.27	227.75	326.29	139.66	205.84	143.08	191.08	364.72	406.67	254.13	328.68	223.64	258.95	107.7	565.74	255.59
1553979_at	na	444.23	504.95	822.92	454.26	489.21	316.92	743.3	537.89	618.08	472.71	295.93	704.11	516.57	335.53	212.33	720.09	938.44	483.78	400.46	217.13	669.63	489.21	561.61	580.77	545.25	802.86	454.16	481.36	395.21	591.76	718.35	401.86	461.42	460.8	488.68	317.2	268.25	363.25	378.22	410.15	896.45	408.04	638.35	1141.68	910.05	576.85	299.31	344.1
1553984_s_at	DTYMK	191.37	224.49	332.53	264.58	163.5	294.58	208.93	394.44	375.67	120.99	180.25	170.35	296.22	126.64	148.53	310.62	121.43	364.7	199.48	176.73	272.3	269.63	222.27	181.39	222.87	267.34	223.54	269.17	212.63	339.45	326.71	192.11	119.52	127.28	219.26	290.36	171.96	197.78	183.16	247.13	297.97	156.01	256.95	139.51	339.48	202.61	280.86	178.46
1553993_s_at	ARC92	420.2	507.9	1245.08	492.23	650.98	522.43	596.1	711.01	357.32	348.4	468.77	314.24	428.48	300.34	571.97	461.27	669.83	628.88	615.74	576.69	377.19	239.06	208.06	373.79	798.75	360.07	202.53	555.54	331.34	438.35	295.42	359.34	281.72	300.59	288.05	229.78	348.87	389.43	250.91	440.03	509.89	245.18	411.41	404.95	291.2	176.42	431.38	273.06
1554078_s_at	DNAJA3	357.25	406.17	908.73	239.57	456.77	704.86	492.92	562.66	438.44	883.97	362.26	400.94	421.78	228.33	489.11	491.86	420.01	577.17	917.3	482.4	500.85	437.33	530.23	426.55	593.49	664.06	372.16	704.13	391.78	505.55	683.17	583.73	515.27	323.2	389.76	393.65	342.15	241.27	276.51	449.04	2767.52	323.99	537.41	530.31	437.62	579.44	653.34	472.68
1554149_at	C3orf4	370.1	261.4	282.13	259.84	352.35	343.04	392.05	356.8	198.13	304.75	482.13	271.77	284.25	290.26	317.34	297.8	352.63	330.11	313.92	189.05	768.15	410.18	262.91	376.01	288.9	261.55	188.95	260.42	206.68	219.4	280.51	431.01	299.4	250.81	366.8	397.8	321.07	358.38	171.15	319.84	282.48	280.48	339.46	335.6	177.9	235.27	254.77	220.72
1554241_at	COCH	242.39	368.38	357.07	284.37	336.55	218.57	326.17	394.76	487.4	471.06	603.52	143.34	395.15	308.1	371.2	184.9	173.94	428.32	577.6	385.1	195.3	334.49	499.45	680.06	505.01	424.8	740.14	385.42	1315.03	486.52	454.42	387.06	215.1	387.56	227.42	341.15	226.45	400.86	620.99	279.55	530.01	829.6	288.83	306.22	714.3	857.15	570.44	473.3
1554365_a_at	PPP2R5C	217.36	121.5	224.22	300.02	161.18	291.94	204.25	293.28	215.45	224.06	284.77	215.24	203.03	197.4	219.23	226.37	174.03	176.25	150	265.83	246.8	236.73	169.44	234.65	188.48	196.57	217.49	187.92	162.22	155.36	239.79	164.17	234.86	157.54	125.39	257.3	213.24	106.05	275.35	295.74	416.33	163.25	349.01	278.74	149.96	262.34	248.92	291.52
1554423_a_at	FBXO7	529.69	422.02	410.46	476.75	630.8	356.75	507.01	385.35	588.65	475.02	613.78	496.55	509.34	457.97	696.13	496.63	507.49	672.32	533.33	876.38	349.68	541.72	742.12	463.42	458.45	482.24	502.63	469.45	376.96	437.76	1360.04	353.36	556.95	507.32	343.33	563.87	556.24	418.99	378.68	728.53	351.93	719.32	478.53	408.37	680.17	419.75	446.51	427.65
1554480_a_at	SVH	362.22	135.47	288.02	208.97	147.05	273.93	197.24	228.92	195.3	317.12	205.92	191.6	225.41	128.34	202.79	273.57	265.17	280.37	180.45	187.87	491.63	177.96	201.66	334.27	231.22	320.55	105.06	210.93	172.75	289.14	260.05	224.97	328.33	192.57	149.44	182.91	160.94	171.91	133.76	410.14	108.68	124.45	212.76	475.33	431.3	245.1	157.43	251.68
1554510_s_at	GHITM	391.69	225.65	316.57	386.42	259.4	934.87	297.12	191.65	248.62	446.33	361.4	302.07	321.09	221.55	344.95	301.28	558.89	174.67	193.28	456.13	253.56	309.37	280.14	185.42	210.58	322	367.34	456.13	174.15	342.69	295.72	316.9	446.49	250.34	129.52	261.42	325.18	268.42	144.48	591.17	165.91	156.07	354.93	312.41	404.78	355.38	494.13	399.17
1554595_at	SYMPK	167.44	274.3	224.83	215.49	289.63	151.62	474.05	303.31	343.15	208.67	208.44	235.36	218.83	351.3	240	214.79	212.8	173.4	167.68	316.33	185.48	117.2	224.07	198.07	388.5	178.5	245.7	226.98	227.49	314.76	173.12	195.24	148.46	269.94	289.19	178.23	177	310.54	757.62	195.76	378.32	251.57	224.87	224.27	175.73	168.05	160.42	155.59
1554678_s_at	HNRPDL	448.82	357.99	334.09	524.38	545.02	389.38	457.16	212.92	139.32	545.98	439.13	294.79	579.83	405.76	328.02	454.51	434.97	278.06	325.33	337.05	326.36	780.9	480.01	285.7	318.81	373.99	385.47	453.19	456.64	470.07	260.39	316.9	198.99	367.48	251.33	448.98	312.49	364.29	194.02	509.73	549.64	239.16	573.38	562.48	291.1	269.19	613.9	410.59
1555037_a_at	IDH1	477.48	329.88	373.14	845.26	503.26	1265.56	443.29	486.09	338.37	267.3	777.87	933.74	455.81	332.58	732.63	300.13	470.01	710.25	396.59	604.08	392.17	267.47	201.72	459.85	364.46	369.25	551.71	1579.94	532	319.83	684.83	408.58	837.5	686.98	279.73	333.2	325.13	249.44	103.59	645.26	211.7	548.79	656.79	578.53	229.71	872.65	528.31	625.81
1555041_a_at	NAGA	289.35	230.48	317.21	220.04	301.87	165.69	230.12	169.06	245.28	261.42	411.17	249.22	296.74	299.03	451.69	235.06	187.34	263.42	288.17	254.01	178.57	217.49	114.12	150.64	134.77	200.71	235.52	280.5	151.14	283.28	127.71	163.09	335.46	254.44	206.83	393.68	434.13	280.19	126.88	391.26	137.39	360.01	297.91	237.57	175.66	144.7	361.12	327.36
1555226_s_at	NICE-3	1016.49	654.51	826.86	616.16	1115.72	890.53	563.65	649.25	655.81	1129.55	594.25	885.91	762.53	408.07	857.36	1663.74	1226.53	737.24	791.99	1077.09	545.21	843.54	674.38	293.91	656.43	682.58	741.43	615.92	646.79	758.93	1561.3	743.68	1057.95	488.55	505.86	924.36	769.86	728.45	142.86	816.16	395.57	846.13	959.17	1054.96	1325.38	990.15	1100.84	1324.21
1555278_a_at	ch-TOG	267.84	319.22	359.64	287.81	492.88	398.58	333.01	334.26	383.6	682.91	250.74	236.82	461.24	126.33	352.07	470.71	437.35	427.29	341.52	357.97	348	599.04	590.66	327.15	303.55	398.35	255.75	190.25	305.39	325.15	310	427.42	320.24	223.9	366.89	448.37	368.92	261.66	121.45	240.32	505.84	287.16	409.73	852.52	410.74	202.75	288.07	307.36
1555411_a_at	CCNL1	975.45	1328.19	727.33	608.69	1198.3	473.24	1657.62	888.92	649.25	456.32	1263.96	1738	1539.23	1078.53	641.24	869.66	942.73	1003.51	955.77	334.2	517.43	1416.49	597.32	586.21	499.72	624.59	513.86	590.31	455.95	719.3	943.78	1176.16	508.1	930.93	741.48	949.98	560.24	1041.97	529.71	705.7	1560.38	560.84	910.53	1532.52	514.1	391.52	506.12	736.79
1555419_a_at	ASAH1	812.18	411.72	224.58	487.38	637.13	735.35	411.22	310.22	740.22	277.47	1040.72	691.18	1007.59	708.92	1492.14	475.75	460.13	354.39	323.6	983.11	323.29	446.51	247.75	261.77	291.83	488.4	657.51	614.96	1096.62	570.81	733.52	538.99	1019.04	674.92	474.21	579.24	594.99	476.96	202.86	814.79	137.21	312.61	815.18	433.59	560.18	511.69	1009.52	900.99
1555575_a_at	KDELR1	1227.48	1452.54	961.26	2076.2	1718.8	1691.07	1235.38	1936.19	872.09	891.47	1091.25	1362.26	1751.34	1693.58	2315.82	1355.45	1413.39	1549.49	1401.83	2599.21	1004.5	886.01	774.8	1574.41	1273.97	1272.32	1010.45	1670.42	1293.24	1192.24	1463.99	1621.33	1737.59	1418.66	1270.25	1038.32	1373.46	1547.71	749.25	1386.38	1454.18	2990.64	766.95	716.85	1193.8	936.29	1161.79	1206.92
1555653_at	hnRNPA3	5955.58	7360.77	6257.52	4711.52	6582.51	3785.21	6224.65	7837.86	4599.35	6681.62	5559.39	8421.97	7235.62	8175.56	4447.33	6504.42	7779.64	5634.88	8845.29	8588.59	5674.58	2410.22	6559.01	8321.28	6573.46	7018.59	4583.63	6953.98	8663.92	5822.34	7432.66	8813.64	8414.73	7711.28	5947.5	6521.46	7453.83	7057.11	5768.51	5424.73	7669.1	9206.68	6383.95	3607.57	7844.51	5191.94	5328.44	4920.63
1555724_s_at	TAGLN	881.1	1247.91	680.33	1101.92	348.2	904.35	481.07	193.04	824.92	273.54	837.76	444.38	1670.56	3556.29	1450.16	363	1282.65	819.92	689.81	476.57	538.3	345.95	1246.51	1955.49	1303.88	1500.88	1855.39	1897.66	970.65	1373.48	1079.2	1231.07	1326.2	3375.62	2112.72	570.69	3983.1	2071.76	204.7	1340.56	343.64	2172.76	644.09	661.54	840.38	1528.22	2082.87	1069.3
1555730_a_at	CFL1	2893.82	2191.24	1878.96	2400.37	2855.65	3310.69	2318.78	1784.99	2511.22	1768.92	2421.91	2418.44	3596.29	2206.27	2693.98	2519.95	2324.48	1218.28	2355.98	2193.55	1342.5	1627.72	1936.86	2704.12	1737.47	1845.38	1904.23	2771.63	3672.75	2904.54	1817.82	3455.53	2757.97	2811.48	2525.04	2570.05	3028.25	2275.18	652.74	2274.91	3805.59	5993.45	2830.49	3327.2	1460.47	2031.06	3944.78	2793.49
1555764_s_at	TIMM10	311.34	293.8	368.94	402.6	261.95	408.45	197.39	334.41	247.52	479.19	230.39	234.09	345.31	162.14	409.91	288.86	381.89	154.39	267.86	605.54	689.5	294.62	319.43	236.89	179.58	302.61	337.49	391.69	322.49	308.81	231.26	203.31	217.31	230.74	201.8	231.81	245.29	230.2	188.98	283.15	210.45	110.06	531.48	662.57	703.45	314.33	312.95	388.59
1555814_a_at	RHOA	1451.27	957.23	953.13	1084.97	1424.11	1078.71	830.95	1017.95	1279.69	1138.66	1433.11	908.2	1624.19	1336.79	2100.55	1174.46	1103.08	833.28	1261.21	1558.61	969.31	1861.34	1358.68	1077.36	953.06	681.28	1490.65	1385.49	1204.12	1391.04	1656.07	1932.23	1110.69	1512.01	1148.33	1488.64	1780.08	1892.55	352.38	1588.02	910.55	1605.47	1535.86	1079.69	1160.4	818.63	1760.92	1706.36
1555823_at	na	224.41	274.33	261.3	307.47	276.62	246.61	162.25	194.84	200.84	180.48	248.96	224.3	329.97	340.16	353.06	187.52	216.39	190.64	217.12	255.41	215.36	217.63	205.78	258.19	191.25	257.67	260.67	252.89	292.89	263.77	215.21	307.27	217.66	269.33	360.87	252.64	293.01	303.84	180.65	218.63	346.67	389.41	193.72	196.53	243.25	343	237.64	221.55
1555832_s_at	na	1152.52	1928.05	1411.03	1074.65	1145.32	597.27	1070.3	681	802.64	656.7	1356.04	848.05	1293.05	788.67	1094.63	1034.7	2328.76	1347.1	1745.15	1041.99	1875.4	2768.1	859.12	573.89	1380.27	781.4	1303.29	774.6	495.29	740.58	1345.25	2361.01	897.91	1561.6	551.09	1955.27	2036.98	1489.57	563.44	2197.48	300.79	2044.37	839.04	1579.89	363.19	515.12	960.23	651
1555837_s_at	POLR2B	1050.19	704.57	1001.99	914.28	1087.84	1031.14	1009.89	1254.66	785.34	1603.67	1120.3	1256.63	924.11	656.82	625.49	828.73	712.81	645.61	547.61	710.67	1013.98	1012.49	698.58	670.46	932.76	948.26	1476.75	938.31	893.98	1087.09	839.18	976.02	529.71	1022.88	875.11	946.48	867.89	341.15	864.23	1196.24	575.68	867.02	1397.27	911.87	1073.3	880.27	1039.5	948.16
1555844_s_at	HNRPM	1281.96	1702.14	1356.14	1380.24	1815.06	1389.19	1617.55	1667.13	1672.52	1602.75	1424.79	1459.24	1640.33	1347.86	1042.98	1928.95	1450.12	1401.44	1459.24	836.89	2191.06	2159.08	1637.32	1391.16	1256.64	1407.3	1581.05	1141.7	1702.62	1662.25	1224.85	1335.76	956.76	1342.64	1587.26	1080.51	1331.82	1398.86	1410.56	1406.43	2348.96	1333.89	1593.21	1844.43	1445.08	1255.74	1410.19	1279.81
1555851_s_at	SEPW1	708.42	1579.61	825.79	1689.18	2434.07	2034.52	803.81	1392.99	970.06	538.39	1080.79	793.44	1334.98	1467.83	2044.37	483.76	1009.64	1291.06	687.41	1560.64	478.73	785.19	743.52	793.01	947.46	884.43	996.04	1403.58	637.78	853.56	1895.14	935.3	989.7	1379.06	687.14	811.69	1610.51	1643.2	403.9	2191.98	430.01	1648	819.34	1047.42	1279.68	569.16	1046.93	671.26
1555864_s_at	PDHA1	393.1	671.63	833.71	656.85	538.67	579.69	644.11	350.09	599.03	593.08	356.09	430.85	273.57	195.78	308.14	492.77	839.07	434.29	360.04	310.57	346.36	786.98	227.39	377.43	594.4	437.66	468.98	348.15	230.93	375.86	473.87	463.49	379.56	231.35	245.84	368.04	474.62	226.04	221.3	455.37	629.47	961.67	277.92	316.61	391.96	235.64	211.97	310.19
1555889_a_at	CRTAP	988.35	856.51	725.2	911.65	1081.13	528.61	576.12	663.16	637.38	462.64	898.47	718.92	712.06	1642.01	1367.04	1182.64	947.54	693.65	775.44	964.17	657.62	518.63	884.94	952.22	622.06	983.5	982.7	966.88	533.51	863.61	730.41	950.77	1137.61	1791.62	1034.04	923.08	1571.67	1351.4	470.82	788.18	291.3	1618.73	866.15	540.57	1055.83	1744.19	984.72	607.37
1555950_a_at	DAF	770.01	247.36	453.6	322.4	297.54	312.65	197.08	1730	357.42	319.49	415.51	352.47	316.65	348.14	343.33	218.61	536.9	338.48	475.37	489.67	179.78	216.67	328.35	400.13	346	531.72	730.48	768.76	470.04	210.39	432.82	602.21	1244.52	325.36	230.98	294.53	450.8	1124.77	169.03	1054.37	189.78	640.96	456.22	415.1	193.89	468.44	872.05	438
1555961_a_at	HINT1	1082.49	904.57	1349.61	1092.41	1360.16	1175.39	836.05	651.66	1008.31	684.18	992.75	657.13	781.24	662.7	899.18	779.08	898.11	825.75	516.69	1189.25	997.3	1225.51	839.92	477.78	544.75	694.66	831.63	1291.06	483	652.27	1494.79	818.55	989.96	719.32	1156.74	1748.94	638.03	1374.78	962.82	1510.16	647.87	382.7	1039.92	777.92	1120.03	1664.88	953.22	530.73
1556060_a_at	KIAA1702	394.14	425.58	494.28	1000.6	304.59	282.12	661.47	769.83	722.22	746.11	390.96	440.57	409.83	309.19	217.43	331.11	360.18	460.51	417.62	299.8	704.49	633.86	1140.19	985.4	1239.37	681.53	414.37	365.02	645.22	459.31	480.02	440.49	407.07	303.19	404.79	410.02	256.39	265.46	874.59	271.96	735.26	610.35	391.19	801.98	534.86	493.79	421.47	562.06
1556442_x_at	na	231.97	368.33	439.54	374.56	332.47	221.31	403.18	388.08	354.91	388.01	244.57	388.22	340.42	463.92	342.34	358.58	368.36	354.23	435.13	358.54	336.29	242.04	407.36	423.34	376	432.47	337.82	338.39	417.54	331.5	299.9	416.55	395.64	429.04	419.65	387.93	350.25	413.27	590.62	329.02	486.28	382.32	264.87	436.32	366.24	383.3	189.5	296.45
1556499_s_at	COL1A1	3363.71	5117.81	4656.2	5454.81	3686.97	4061.1	4360.71	4733.55	4866.45	3637.28	5929.13	4952.03	5782.43	7262.34	4066.08	4034.55	4582.66	6159.91	4318.39	3681.39	5420.56	4270.87	6156.58	7399.13	4811.96	5926.9	6183	5637.64	7456.53	4543.32	4681.04	5989.83	5011.79	5932.92	6762.94	4755.84	5719.61	6408.7	2234.37	4521.03	4044.23	7365.85	6090.3	3632.41	5433.81	5445.12	6508.38	4816.36
1557053_s_at	TIP-1	291.21	253.47	273.37	109.72	322.65	147.79	230.16	107.85	124.13	194.3	208.55	267.47	230.59	328.15	162.17	232.17	154.05	133.38	166.17	146.71	305.6	340.69	169.75	171.54	133.75	214.29	113.17	315.71	109.53	247.6	249.81	111.2	217.26	236.52	126.58	100.63	231.02	283.66	243.72	404.84	264.26	324.68	194.65	201.35	152.46	133.73	244.78	151.51
1557820_at	AFG3L2	746.59	743.46	1243.67	702.19	446.06	1212.79	1053.46	424.45	790.48	1300.31	753.31	638.61	599.75	411.76	511.01	830.62	876.57	873.13	601	1015.32	769.09	1551.31	856.11	831.95	1019.91	939.98	407.12	702.62	830.08	877.04	618.91	568.14	759.2	563.29	783.03	325.78	747.86	331.37	600.64	920.91	436.66	2018.67	878.06	1495.43	795.5	670.17	553.63	370.84
1557915_s_at	GSTO1	574.61	285.21	299.29	466.5	626.3	490.8	267.56	299.59	715.95	464.61	576.89	311.64	341.98	391.96	533.31	288.04	405.44	274.74	278.58	614.24	155.34	532.57	314.3	262.83	203.19	407.32	476.21	498.34	167.78	456.15	291.16	202.16	325.33	193.49	289.85	356.19	394.08	399.07	117.32	426.59	177.5	192.88	334.31	286.04	433.3	467.56	338.78	227.4
1557953_at	ZNF36	231.65	167.25	329.37	186.19	250.3	129.97	222.6	746.57	516.38	359.41	131.99	176.13	267.72	247.22	266.09	289.19	283.12	1155.02	136.76	110.45	277.27	177.81	612.5	1232.29	311.35	780.42	605.78	401.44	266.69	190.16	222.98	236.78	211.25	416.17	266.81	196.13	303.5	342.6	212.02	393.23	173.91	173.95	178.19	233.77	1370.43	895.99	190.55	284.18
1557987_at	na	413.62	759.86	1189.85	398.19	489.17	268.59	1178.56	838.69	1161.27	686.05	516.58	535.89	477.39	1042.96	309.13	509.12	332.83	1084.96	237.55	334.36	635.3	403.07	959.37	579.95	367.23	830.05	520.96	405.67	443.55	489.33	446.84	414.82	263.13	521.35	603.81	571.26	344.13	555.31	1693.27	428.58	1078.47	288.57	383.55	499.27	482.47	920.18	270.88	267.52
1558097_at	MGC50372	324.37	370.27	592.91	402.1	360.72	351.72	588.02	249.93	462.36	336.91	366.43	461.61	448.63	312.67	309.86	718.52	430.03	749.99	436.24	395.57	499.49	399.52	412.69	574.42	410.86	347.91	352.59	336.15	401.68	317.57	797.66	374.72	419.7	405.42	271.15	453.78	298.46	287.68	395.83	631.67	440.35	486.22	428.56	392.36	467.24	458.94	298.64	273.77
1558426_x_at	C7orf19	274.71	328.52	288.81	306.46	265.73	194.92	457.05	516.64	459.31	300.66	277.59	371.45	279.67	613.44	249.93	287.91	237.04	388.88	240.12	206.94	282.04	195.3	367.9	455.21	212.42	441.06	369.87	268.86	320.12	279.81	182.45	272.24	241.24	288.33	297.27	294.32	223.53	312.61	1189.29	202.71	259.94	209.08	182.82	220.89	496.46	552.08	178.16	242.28
1558641_at	LOC202051	143.95	231.66	171.25	174.32	160.27	175.69	154.39	172.26	170.43	179.33	166.28	190.36	168.78	210.19	207.2	163.96	176.59	166.85	236.18	221.08	131.62	139.04	158.66	201.36	177.64	176.27	194.37	177.69	191.27	198.96	152.6	178.74	175.53	183.36	214.32	177.23	150.96	191.85	208.73	202.44	217.47	243.01	163.88	133.24	164.98	174.05	156.75	177.92
1558675_s_at	SDCCAG1	304.54	197.74	170.06	429.03	433.76	223.44	220.1	111.69	188.7	224.19	247.74	196	261.16	206.89	172.08	232.28	235.87	112.25	191.5	248.1	298.69	256.93	128.2	111.2	135.19	120.71	173.77	146.91	211.19	378.05	227.57	359.76	239.78	166.66	168.75	260.45	186.21	353.84	198.42	190.55	174.04	329.22	242.27	413.12	207.36	166.28	170.74	300.27
1558678_s_at	MALAT-1	1677.22	2664.42	5357.32	1819.97	994.8	577.05	6230.55	1559.24	3012.6	5006.48	2875.75	2349.92	1824.94	2781.51	745.75	1557.79	2536.34	3116.62	1032.08	1247.43	1824.98	1928	4571.92	4296.24	4493.23	5188.61	2428.94	2164.82	2613.46	1599.59	1780.58	4731.66	1494.24	3833.73	2296.07	1627.49	1913.82	4054.09	6039.17	1589.96	3241.81	1778.33	1938.95	5967.41	3727.98	2985.22	1727	2967.45
1558688_at	na	227.16	381.61	310.09	532.13	325.21	414.51	242.77	385.38	286.41	235.71	468.3	338.06	472.82	787.39	406.61	242.46	303.5	388.83	329.21	347.84	268.41	187.5	319.2	637.48	308.92	433.07	465.51	493.56	422.33	312.24	300.06	380.41	469.73	388.61	644.11	311.06	505.53	498.7	219.05	284.34	348.19	736.39	250.46	220.03	309.99	396.53	403.77	318.17
1559436_x_at	na	229.97	394.1	422.26	326.65	352.78	174.38	537.36	530.51	709.38	487.86	308.74	392.19	281.02	836.39	296.37	306.62	239.13	652.58	270.85	244.38	322.98	294.04	651.9	510.99	413.59	664.47	489.53	270.13	340.19	342.54	197.1	240.55	233.89	382.25	472.91	461.36	279.25	364.74	1304.16	251.63	395.47	247.98	259.55	356.75	590.14	597.88	206.09	270.37
1559946_s_at	RUVBL2	440.13	555.25	722.08	686.29	668.71	750.11	448.49	597.29	602.1	601.59	338.16	270.26	570.75	214.94	415.36	514.02	494.11	456.16	509.62	725.19	598.99	609.87	334.76	335.72	475.56	522.25	371.53	527.24	445.71	798.84	501.87	314	193.84	291.51	342.63	268.38	365.21	318.77	196.77	768.11	600.59	537.83	328.03	425.1	578.91	248.42	570.06	298.09
1560060_s_at	FLJ20847	574.34	501.9	634.74	674.89	430.96	585.17	705.11	730.73	645.1	612.58	526.28	645.58	602.22	415.08	738.52	541.58	734.87	533.79	871.2	466.48	715.71	496.99	782.65	669.82	592.38	842.56	1183.95	849.01	1150.47	490.56	325.3	871.17	592.76	629.01	485.71	677.59	501.87	821.09	276.13	451.28	566.24	771.78	604.46	664.54	671.53	1030.44	717.26	782.07
1560339_s_at	NAP1L4	360.83	392.31	470.08	348.29	454.79	301.99	420.95	381.88	424.48	420.09	311.48	253.79	365.64	386.23	501.99	470.2	466.7	309.99	335.03	241.64	444.72	548.42	472.09	293.96	515.4	473.96	309.61	391.75	347.63	318.33	276.53	312.98	381.75	334.43	619.51	475.59	452.7	500.5	231.51	367.4	1095.37	292.32	422.12	422.34	469.55	219.43	487.96	607.87
1561346_at	na	165.14	320	298.65	229.46	236.24	155.24	394.46	380.98	338.06	289.03	204.31	324.58	234.95	485.15	234.9	170.04	180.37	399.85	168.38	194.28	219.7	194.81	401.61	386.75	247.99	426.35	361.31	265.25	319.65	253.79	222.33	208.85	206.38	295.54	343.94	294.81	219.96	274.04	845.65	199.69	309.56	210.89	205.1	279.41	384.29	462.73	159.16	206.01
1564207_at	FLJ35390	210.81	253.05	302.05	193.17	181.58	145.84	154.97	110.11	131.54	155.78	195.07	242.68	173.94	247.77	253.98	164.01	141.69	123.28	192.11	197.01	175.99	150.84	125.4	155.65	170.79	180.89	152.38	160.98	157.41	177.24	115.45	157.43	181.87	207.29	196.57	192.38	249.64	410.98	330.51	116.07	174.91	308.8	189.72	184.83	334.6	142.02	340.53	280.04
1566303_s_at	PPP1R11	384.96	250.73	220.58	242.94	368.66	265.44	142.29	221	115.98	148.48	250.36	398.74	287.29	257.67	268.72	359.72	311.53	266.82	314.66	259.61	155.85	207.47	173.08	279.12	302.06	158.39	182.09	239.22	269.92	239.46	207.39	601.14	458.42	253.51	288.24	255.92	688.72	294.27	122.66	173.94	439.49	466.74	218.1	111.84	206.96	241.06	189.67	259.54
1566956_at	OR7E104P	163.38	279.36	177.24	202.99	194.14	203.71	189.35	191.05	160.1	172.69	174.6	204.86	168.02	199.67	209.97	161.83	199.22	163.57	256.93	236.25	144.04	160.7	148.53	196.57	192.95	179.25	150.73	173.4	193.5	214.63	168.13	161.91	181.19	164.34	216.76	193.32	191.95	176.28	210.02	179.75	191.43	221.21	138.04	135.31	196.01	172.3	129.2	169.98
1567458_s_at	RAC1	953.03	581.92	679.38	1914.85	672.79	563.77	633.49	797.84	852	922.75	805.29	818.29	1005.96	651.42	857.86	935.68	770.16	859.25	1401.88	509.35	569.38	729.9	644.26	450.89	624.55	767.27	902.65	877.41	1072.98	538.38	759.92	1594.69	860	578.78	526.7	1027.77	678.12	603.04	208.68	749	396.7	958.8	1515.23	532.98	373.56	702.25	1027.83	633.14
1568513_x_at	na	332.98	743.51	408.08	648.78	406.54	371.66	371.99	481.55	365.48	414.47	339.91	517.71	453.09	538.93	508.84	372.21	547.22	325.39	863.35	479.43	257.35	277.63	375.55	613.13	389.93	542.66	479.99	702.04	533.3	459.97	659.62	492.69	645.63	520.41	565.73	495.69	589.55	472.13	486.21	561.02	435.09	520.46	434.14	286.55	491.69	527.49	360.11	578.01
1568619_s_at	LOC162073	223.55	223.29	322.72	166.66	127.22	212.96	253.95	542.6	313.97	596.94	326.06	297.34	327.26	402.79	177.05	167.82	189.41	318.11	333.14	135.19	229.99	149.74	391.44	475.35	524.49	543.7	448.55	285.8	624.41	208.8	122.4	254.85	293.21	544.29	259	180.27	241.41	463.75	148.19	120.04	175.58	429.52	467.98	194.07	344.54	622.09	686.87	388.38
1568629_s_at	PIK3R2	323.42	333.72	683.52	512.51	456.16	379.02	211.46	561.52	217.52	247.19	235.86	406.91	465.67	349.53	366.01	507.31	486.67	258.94	609.8	371.63	491	316.49	262.68	945.38	334.8	376.71	322.24	848.32	588.33	319.28	544.5	268.41	414.94	458.91	428.86	313.15	380.27	359.87	339.41	331.13	762.72	425.01	462.35	389.7	730.67	378.69	319.48	588.24
1568763_s_at	PDCD6	407.47	273.81	330.41	259.59	527	298.43	655.77	524.02	165.5	477.68	243.08	462.76	217.13	189	199.38	502.65	444.58	408.96	289.36	248.1	104.14	217.72	223.69	420.89	259.71	457.66	257.68	313.98	512.78	433.44	972.37	232.89	275.49	251.72	500.06	817.08	263.35	573.37	289.34	437.62	534.97	213.17	751.47	575.96	621.65	294.75	436.4	270.38
1568986_x_at	PIGT	123.61	205.45	162.69	164.45	157.42	140.61	220.15	194.84	266.97	172.22	142.82	184.26	138.83	224.95	139.89	135.36	138.13	198.76	186.17	120.7	124.81	135.63	200.93	188.61	168.59	180.85	198.23	170.42	201.03	156.89	148.88	135.18	153.95	170.56	161.59	135.24	138.78	166.01	452.23	159.38	217.05	184.8	149.58	131.41	175.29	193.92	131.42	161.07
1569105_at	FLJ10707	139.02	231.4	184.07	193.65	210.45	195.2	144.88	179.48	125.19	240.14	178.31	199.18	188.21	203.27	175.28	148.76	169.46	113.49	198.77	249.57	117.6	143.59	154.21	186.67	166.33	141.63	164.14	170.13	177.67	230.21	176.65	184.4	201.08	154.79	215.61	201.42	205.21	196.65	140.38	165.97	241.98	239.19	135.41	157.46	179.88	175.66	152.39	174.36
1569200_at	na	126.32	208.61	186.99	179.3	242.14	168.21	153.22	162.24	120.22	151.21	144.22	179.5	180.44	211.44	193.6	138.21	175.14	143.47	157.23	149.44	124.45	120.37	142.02	192.71	170.27	164.9	182.86	172.1	182.39	164.54	161.7	153.68	168.66	186.26	196.57	183.49	236.49	178.39	172.73	147.43	255.26	242.87	160	172.96	160.43	166.72	126.3	142.92
1569522_at	LAT1-3TM	160.46	220.54	175.27	210.41	257.63	232.1	168.4	192.96	171.39	187.4	198.07	216.25	207.87	204.86	270.64	171.98	195.46	139.97	224.8	249.95	129.95	164.36	143.12	157.72	189.13	169.67	182.42	194.65	188.06	223.63	167.91	194.99	214.82	151.92	208.67	234.8	222.63	201.65	169.61	183.8	207.63	237.83	148.61	136.86	164.23	169.52	149.79	186.84
1570266_x_at	na	120.04	214.4	128.1	146.65	144.6	144.8	127.28	136.81	120.82	141.54	125.16	169.02	139.34	154	173.98	130.2	123.61	117.67	186.21	154.64	115.93	123.52	123.06	135.64	152.28	146.1	125.7	168.55	159.33	145.13	126.06	145.22	159.47	141.23	151.89	145.56	137.78	148.86	143.34	136.6	164.4	165.19	120.69	116.36	142.26	163.49	101.1	144.19
1598_g_at	GAS6	307.57	506.34	428.81	329.23	295.9	293.65	436.88	563.57	218.02	175.68	420.47	528.92	368.66	1010.56	945.86	426.26	325.49	272.54	296.82	337.1	362.05	302.52	363.2	420.22	613.41	461.94	466.2	482.41	366.71	483.79	473.95	468.41	537.69	1176.89	839.59	722.51	636.48	664.4	167.21	224.39	229.96	278.1	260.68	566.56	363.18	280.22	375.62	327.13
160020_at	MMP14	320.43	405.98	358.09	441.62	546.67	401.44	332.23	121.84	176.51	154.96	565.29	405.09	605.11	716.17	436.27	385.8	531.53	278.08	709.51	393.17	354.21	240.39	226.18	415.64	385.93	205.41	230.88	558.76	476.49	356.98	358.69	849.78	545.39	519.47	753.82	381.93	720.09	681.03	116.76	331.95	294.45	1197.15	300.11	280.6	121.21	215.92	372.24	343.43
179_at	PMS2L11	142.9	199.9	164.82	179.25	179.06	188.46	120.28	133.43	109.68	140.2	129.07	152.06	168.67	151.34	194.56	123.57	155.31	112.6	206.29	162.07	118.74	116.72	118.45	189.29	135.83	138.12	135.05	181.04	192.78	166.7	146.76	180.66	147.9	172.19	219.68	162.44	196.33	176.09	105.49	155.76	172.41	176.27	128.53	121.48	163.4	156.39	129.13	181.97
200000_s_at	PRPF8	720.06	890.28	604.19	684.31	703.02	750.84	723.66	776.29	745.01	799.01	550.09	1101.63	760.63	668.92	771.13	984.26	690.82	496.83	1022.66	1824.09	777.37	1091.06	1119.21	828.17	776.61	1038.5	742.19	660.64	774.33	808.68	638.11	1235.38	746.24	1002.89	1297.71	1076	1688.27	608.89	728.02	532.15	1296.02	601.92	543.43	978.35	946.76	536.46	582.1	483.72
200001_at	CAPNS1	1440.55	1312.28	2125.84	1483.17	2240.43	1401.57	1567.22	1890.57	1585.89	895.48	1871.58	1374.67	2115.66	1486.34	2961.84	1731.93	910.07	1884.32	2539.1	1653.17	1039.53	1337.76	1361.07	1321.6	2001.51	1275.06	1313.12	1671.67	2143.06	1266.6	1469.63	2927.98	1502.35	1850.46	1239.89	1360.13	2156.86	1986.07	1001.67	1869.4	1583.52	4276.28	1150.78	1647.37	1512.17	946.85	1457.15	1620.35
200002_at	RPL35	1632.52	1174.98	4003.78	1357.77	1819.6	2083.29	1332.96	1934.08	3699.19	1881.39	1324.32	1632.17	1295.35	1716.58	1870.88	1480.6	1377.46	1393.96	963.59	1395.82	2502.39	2452.87	2582.59	1564.51	2108.53	1478.07	1375.7	2145.89	824.39	1698.59	1723.93	785.8	1555.93	1355.42	1432.49	1820.62	1466.08	1851.38	1819.96	2296.2	2055.76	1201.65	1553.19	3235.64	4061.13	3946.15	1279.05	1840.72
200003_s_at	RPL28	7777.74	8611.63	9615.47	8591.16	6121.41	7946.11	8212.72	7516.53	8645.75	6201.26	7367.22	5210.97	6728.3	7614.56	8400.33	8703.33	7005.77	8732.66	4386.03	6933.86	8837.92	11260.2	7001.81	7525.99	9762.5	9449.01	7143.12	7054.94	6705.67	7975.46	5519.82	4531.75	4680.65	6383.79	6457.11	4837.59	7019.97	6221.71	8896.73	7937.99	7975.46	5377.82	8056.94	8097.17	7193.78	8045.86	6604.3	7617.38
200004_at	EIF4G2	3245.43	3071.98	2040.71	3442.03	2200.45	3805.69	2646.33	4554.59	3214.11	3380.18	3061.91	2825.72	4448.98	2877.55	2824.62	3308.36	2864.06	3228.71	2719.42	2042.42	4080.36	3368.8	3834.53	3146.84	3078.53	3739.36	2800.87	2686.81	3523.88	3133.74	2079.74	4441.23	3045.2	2979.33	3210.91	3009.15	3000.7	2888.47	2547.69	2161.78	6804.19	5157.74	3080.83	4384.99	2251.52	2105.37	3303.59	3308.8
200005_at	EIF3S7	1093.39	916.98	2766.05	839.04	868.87	953.17	778.93	777.99	1564.92	1248.81	961.58	1332.54	958.07	1038.76	835.64	1237.78	1768.43	1071.83	1243.76	586.29	1673.34	1546.6	1427.66	1200.91	748.38	985.91	727.73	860.54	673.91	839.43	669.47	761.73	841.72	1177.08	661.99	1089.08	1077.53	913.8	1137.92	1557.25	823.11	770.53	880.19	746.67	1678.47	940.9	895.4	1149.26
200006_at	PARK7	1888.68	1682.78	1902.91	2213.35	2224.97	2597.84	1577.82	1045.51	1756.45	1967.11	1730.96	1493.22	1160.71	1461.32	1532.03	1260.95	1540.32	1036.5	1755.82	1685.06	2258.93	1817.81	1403.18	1336.95	2019.79	1394	1420.55	2249.64	963.17	1675.08	2108.04	1227.71	1451.8	1683.63	1713.63	1406.01	1433.65	1140.97	1277.84	2597.69	1352.04	737.71	2788.29	1039.17	2423.67	1356.86	1898.93	1514.58
200007_at	SRP14	1887.35	1176.66	1487.12	2913.18	2209.6	2023.8	2012.14	1593.88	2594.86	1365.38	2483.58	2300.24	1775.2	2002.27	2051.8	1822.12	1891.8	1444.37	1248.09	1612.55	1969.3	2106.29	1677.27	1678.78	1286.05	1657.89	3039.34	2298.86	1632.07	1350.69	3171.58	1780.88	2541.4	2205.34	1457.82	1983.47	1598.07	2256.7	1676.19	2166.66	1860.9	994.81	2479.71	2255.34	2138.42	1811.62	1653.38	1772.47
200009_at	GDI2	4183.28	2806.95	1745.17	4856.93	3137.7	2719.14	2119.28	3482.21	4028.09	3387.15	2454.99	2606.05	2203.95	2346.16	4453.64	2693.15	4662.27	4194.22	4555.6	4309.88	3486.77	2452.22	3565.19	2798.78	3404.6	3146.19	4265.88	3279.56	2359.54	1718	3108.13	3616.62	4131.44	2267.35	1949.38	3126.3	4028.32	2171.18	2501.62	3395.99	1772.25	5149.91	2718.1	4007.85	4011.71	2614.34	2096.17	2983.99
200010_at	RPL11	4675.42	4066.55	6088.89	4217.7	4307.42	3911.14	3759.25	2836.13	4382.32	4697.78	3457.69	3982.82	4968.24	3447.74	3895.89	3864.36	5878.15	2859.86	3642.23	4205.97	4914.57	5602.67	5220.19	4969.98	3569.18	3993.57	2755.04	4225.75	2331.26	3517.1	3740.26	3266.43	4047.02	3685.91	3995.54	4182.55	3583.61	2903.7	5249.03	5241.2	4613.64	1665.28	4921.99	4023.25	5908.88	5002.48	3226.99	5055.66
200011_s_at	ARF3	1148.51	623.46	837	898.63	980.9	1738.8	983.29	930.99	1007.46	713.37	831.88	1061.11	711.18	769.73	1355.12	1474.53	874.78	740.38	964.19	698.26	560.57	734.63	631.27	655.69	1097.35	430.78	613.44	990.66	809.36	1064.07	964.45	894.08	931.53	1044.38	1092	565.15	1160.08	1058.16	545.87	888.03	1048.84	837.61	962.9	812.86	842.06	926.91	1068.93	1214.4
200012_x_at	na	3398.73	3362.41	4318.58	7067.69	2634.01	4207.25	2275.77	2688.49	4981.97	3147.44	4214.51	4693.34	2633.05	3444.65	3044.96	3502.96	3739.48	1290.16	1751.83	3266.67	4356.51	3197.88	3233.38	2995.16	1456.91	4000.96	3905.98	4811.92	2269.11	2786.69	3082.6	4046.42	3692.28	3749.06	3590.97	4940.51	3150.67	2678.96	4683.59	4026.08	1889.9	1190.98	4053.54	3587.76	3600.4	5380.33	2620.25	2477.42
200013_at	MAMDC2	3780.58	3121.59	6736.53	2255.38	3905.67	5812.76	3118.2	2733.79	3584.21	3463.22	3292.24	3019.93	2968.99	2809.2	3557.64	3420.6	4136.49	2254.48	1336.01	2518.01	4287.66	4802.25	3777.31	2022.52	2562.08	4510.93	2281.75	4579.7	1377.28	2833.69	2731.09	2488.65	2833.92	2645.7	3525.94	2691.91	2323.48	3653.2	3882.34	5308.72	2117.69	1178.41	3557.07	4514.33	5452.26	5692.93	3854.13	4822.89
200014_s_at	HNRPC	923.92	805.84	1095.4	752.2	473.83	841.7	570.28	498.12	909.61	768.5	742.8	666.08	554.05	528.96	334.9	697.55	501.11	797.34	628.06	546.32	701.1	972.52	712.56	432.37	710.52	727.93	726.71	615.59	435.19	752.13	742.85	549.17	455.2	490.17	549.11	558.32	401.78	548.81	580.37	787.23	710.73	386.34	788.16	936.32	567	923.56	601.07	737.46
200015_s_at	NEDD5	1698.86	1482.74	1173.28	2233.29	724.16	1523.17	1380.58	1811.43	1273.47	752.4	1704.27	1348.38	1721.98	1751.64	1196.17	1743.86	1204.19	2195.26	1357.14	1272.19	1159.37	1334.86	1588.99	1532.97	1489.57	1708.39	1385.95	1732.35	1645.02	1814.94	1927.57	1114.49	1623.51	1793.47	1744.83	1883.54	1201.63	1682.11	935.52	1526.69	1176.7	1957.11	1503.66	1073.1	1485.71	1664.51	1920.16	1707.82
200016_x_at	HNRPA1	5956.61	5727.11	6167.39	4354.17	3735.72	4909.93	5594.32	3983.11	5407.1	4518.77	4756.47	5323.1	5216.09	5171.04	4998.18	5351.92	4558.43	5029.44	4936.82	4362.33	5348.34	5722.47	5663.38	5560.23	5641.77	4704.01	4849.68	4362.41	6612.76	4665.96	4494.38	4523.47	4356.22	5688.12	6424.45	4298.96	4884.31	4532.8	6098.44	4138.08	6138.17	4679.23	5700.93	4561.74	4718.02	6257.25	6294.88	5688.04
200017_at	RPS27A	6231.05	3900.75	7280.16	5938.94	5628.36	7606.61	3221.83	5080.86	5609.18	3432.52	5104.29	5858.63	4720.84	3948.51	4302.15	4923.31	4589.46	2885.08	2503.26	4991	7090.13	3834.8	3592.27	3135.05	4271.27	6313.58	4982.84	5131.58	3749.27	4789.61	4702.67	4260.93	4416.46	4442.73	4099.37	4845.24	4672.88	4180.17	5209.77	6678.9	3259.85	1951.68	4840.23	5801.69	5709.68	6392.01	2844.38	3888.09
200018_at	RPS13	6668.95	5482.72	7033.13	3684.28	3998.34	6455.67	4101.54	5403.87	6132.64	5649.28	5507.19	5153.91	6500.37	5576	5310.42	6436.49	6837.73	3872.01	4108.97	4932.34	6509.72	6556.24	6341.22	4222.05	4804.64	8352.63	4517.91	4422.53	3713.04	6248.24	3560.43	6514.99	5110.14	5793.85	4557.04	7232.32	4759.36	4235	5144.15	4641.64	7498.33	5040.53	5354.63	5869.35	7040.46	5499.3	4624.87	4670.34
200019_s_at	FAU	2193.61	1798.95	3296.79	1817.13	1982.62	2855.31	1954.15	1105.5	2983.2	1792.59	1960.51	2003.04	1792.5	1779.44	1790.22	1654.41	2213.19	867.69	797.25	2355.85	1869.65	1375.45	1736.42	1435.39	1209.19	2353.22	1230.47	2022.73	1161.56	1780.94	1255.99	1738.96	1842.95	1523.87	1776.77	2070.2	1589.86	1760.08	2319.67	1672.31	1470.14	605.48	1562.42	3531.99	1679.24	2622.75	1506.28	2181.73
200020_at	TARDBP	596.08	811.28	599.44	802.57	949.77	738.31	858.87	598.98	636.02	575.05	729.36	543.13	662.89	479.56	655.05	868.89	651.81	618.29	598.85	588.2	901.84	907.18	708.15	561.27	731.8	454.51	532.56	491.71	590.83	815.76	634.92	541.41	482.49	582.46	876.35	636.25	657.62	849.11	616.61	586.58	1142.75	613.8	657.62	711.74	540.45	460.7	558.66	642.89
200021_at	CFL1	9600.02	9868.66	6892.49	9066.88	9673.31	10039.6	9892.21	8672.12	8267.93	8351.04	9129.77	10256.2	10091.6	8509.31	9019.25	8975.37	8712.61	8456.88	9568.72	8475.8	6251.79	6073.61	8220.48	10986.4	9240.5	8295.61	8369.5	9118.6	10607.1	10044.2	7771.34	10674	11561.5	9353.55	9338.65	9116.16	11378	9231.46	6863.19	8141.26	12675.5	11842.6	8988.28	11175	6560.31	7334.81	10397.7	9125.25
200022_at	RPL18	5954.69	5402.09	8279.7	5510.66	4602.94	6586.94	5389.04	5418.67	6744.14	4360.06	4149.89	4285.46	5226.69	4826.92	6081.61	4584.64	5555.44	3916.54	3211.74	6823.31	4613.78	6719.49	4460.68	5320.19	4997.63	6886.37	3521.35	5127.93	4594.42	5911.98	4710.32	4550.73	4372.84	4670.15	3809.05	2904.16	3976.97	4094.03	6873.34	5983.28	5840.08	4147.66	4138.39	4956.27	6226.5	6037.11	4454.67	4091.37
200023_s_at	EIF3S5	2217.19	1874.12	2205.38	1575.27	1192.98	1749.62	1279.45	2881.06	1751.54	1472.88	1276.43	1862.52	1317.63	2081.44	1886.8	2051.27	2319.28	974.44	1385.14	1188.45	1749.46	1759.49	2209.52	1786.99	2028.23	2832.21	1334.94	1142.1	1347.71	2323.52	989.12	2951.74	1701.76	1668.56	1860.7	1422.82	1561.1	1434.04	2634.2	1335.07	3554.64	2434.9	1790.14	1483.43	1083.72	1622.96	1909.93	1352.17
200024_at	RPS5	4063.19	3683.66	3770.84	4085.38	3868.41	4131.76	2182.05	2720.38	4010.49	1929.8	2551.29	3313.93	2903.25	3287.61	2926.89	3600.89	4242.04	2550.09	2242.14	3791.85	2823.45	2875.61	2269.45	1638.2	2924.81	5713.31	2499.8	3460.7	2180.42	4039.74	3972.46	3215.2	2876.43	2380.55	2898.74	2321.7	1795.99	1644.23	3654.37	4058.89	3201.55	1103.98	2886.38	3128.16	3731.64	4329.74	2686.13	2691.6
200025_s_at	RPL27	3234.38	2120.03	4812.88	2338.51	3126.45	3699.35	2201.59	2649.21	3002.64	2101.86	2518.22	3027.2	1545.22	2956.99	3274.92	1987.1	2692.69	1057.83	1193.35	3158.95	3732.29	3706.32	2349.74	1318.41	1330.31	4387.99	1421.66	2278.7	862.18	2706.16	2831.29	3363.05	2452.82	1838.09	2346.41	2547.43	3010.9	2308.61	4461.07	3621.65	2053.33	820.54	2112.08	5055	5015.47	3472.67	1452.85	2709.58
200026_at	RPL34	3148.8	1771.01	2834.86	2421.62	2623.77	2254.77	1888.84	1645.35	3301.79	2068.97	3347.48	3631.11	1779.68	2083.12	1984.37	1982.64	2178.58	1105.75	1268.41	2886.6	2675.2	2311.34	1972.86	1718.33	1646.51	2386.63	1961.79	2664.84	985.39	2118.51	3054.66	2223.44	2897.32	2414.1	2666.68	3484.28	1920.49	2481.51	4009.62	3387	1396.34	1004.06	2797.66	2857.14	3796.35	3760.05	1823.54	3437.96
200027_at	NARS	1880.96	1795.53	3189.05	846.18	1607.55	1378.14	1802.23	1466.97	1774.8	1349.63	1414.13	2051.14	963.66	977.89	671.67	1612.86	1662.64	1138.43	946.02	1799.54	2652.88	1120.19	1014.58	1412.12	977.93	1703.42	963.26	1060.89	1518.15	2061.99	2533.3	1172.71	2501.24	958.81	663.71	1249.95	1352.76	767.75	944.34	1819.19	836.33	783.83	1676.75	779.49	2091.67	841.22	1164.51	923.28
200028_s_at	STARD7	1918.27	1072.49	1197.46	1096.28	1456.76	1788.13	904.8	957.82	1187.03	1605.92	1267.26	998.52	1203.77	878.82	1260.38	1274.96	959.73	1555.85	1231.21	1526.08	1000.76	927.4	982.19	1510.49	934.03	1102.81	1187.56	949.54	1171.3	1478.86	1062	823.95	1188.47	968.44	937.52	1177	822.12	826.84	1256.57	1174.21	1038.57	1026.3	1334.63	1232.25	566.81	824.69	1277.77	1154.42
200029_at	RPL19	5700.69	4308.74	5730.72	4708.89	4962.74	4064.57	3609.66	2940.42	4328.8	3414.85	3150.47	3938.07	3051.2	4397.33	3838.07	4355.62	4034.58	2070.98	2759.16	5964.43	4388.44	6323.95	5541.38	2338.4	3396.02	6353.8	13568.9	13346.4	5935.42	3447.92	4323.95	12826.2	3180.89	5868.84	4333.46	3329.14	4898.27	3631.4	4952.66	4725.08	2782.67	1733.83	6015.06	5616.17	5943.25	13933.7	5883.75	4729.21
200030_s_at	SLC25A3	2872.61	2865.6	3926.55	3478.63	2835.47	4313.12	2570.11	3627.28	2988.31	3340.46	2453.3	4794.74	4339.02	3111.84	3264.97	3195.91	3175.46	2030.8	3049.37	4214.65	4039.6	3464.39	2734.7	2650.95	1909.23	4155.27	2406.96	3252.18	2079.48	3138.62	2519.82	3233.08	3206.01	2826.52	3090.63	2331.31	3539.03	3283.77	2332.96	3013.58	4544.43	2909.61	2540.43	2619.51	3313.18	3966.61	2172.66	3838.09
200031_s_at	RPS11	8332.61	6818.62	7679.94	9208.57	6695.75	8528.26	6288.97	5489.15	6297.37	4499.33	6597.69	6264.43	6830.17	6388.23	7185.7	5814.88	6884.87	4691.4	3510.34	9195.1	5657.52	6905.67	4936.35	5137.88	5931.16	7945.05	5397.84	7498.09	5710.64	7092.67	5912.94	6576.66	5575.53	6502.1	6308.28	5532.21	6280.11	5640.1	8044.28	6704.6	6119.76	5102.27	6433.68	6433.27	6316.4	6646.39	5287.99	5089.77
200032_s_at	RPL9	2162.11	1362.76	3219.19	1101.24	1775.25	2602.81	1546.39	1983.12	2491.98	1252.69	2206.32	2858.74	1208.6	2645.59	1460.53	1066.2	2158.43	1011.13	880.04	1733.87	2086.25	2459.51	1749.52	1462.78	1362.5	2236.75	909.6	1547.23	711.49	1427.48	2361.41	1733.25	2228.04	1697.81	1648.52	2224.42	1393.96	1546.48	3216.51	3257.63	1110.77	538.8	1924.59	1787.41	2553.49	3092.36	1610.48	1775.73
200033_at	DDX5	3240.43	3555.19	1905.36	2598.45	3042.92	2296.25	3688.09	2709.71	3008.38	3453.79	4371.71	2796.1	3976.69	4324.45	2275.87	3495.46	2772.35	2459.07	3062.18	2347.01	2804.66	3317.5	3339.85	2102.61	3447.38	2812.2	3008.38	3278.91	3929.1	3715.04	3959.01	2541.18	2428.49	4005.58	3241.67	4834.47	2618.93	2216.43	2960.45	2434.58	3807.49	3080.18	4312.23	3502.68	2839.84	2192.4	3221.59	2740.57
200034_s_at	RPL6	4705.13	2943.82	6358.85	4282.47	3027.09	4831.95	3312.58	3757.67	4087.19	3953.5	3073.47	4435.01	3636.55	4324.4	3593.5	3130.26	3796.28	1689.84	2492.93	3827.69	5347.03	4370.78	3920.07	3550.5	2368.12	4564.97	2730.41	5260.83	2489.54	3693.39	4421.37	3122.63	3451.43	4134.02	3840.16	3030.73	3335.61	3765.72	4541.6	3948.27	4998.44	1525.11	4068.1	3241.86	5102.18	5810.39	4369.74	4940.81
200035_at	DULLARD	510	498.88	348.62	438.32	429.94	460.11	484.51	353.98	304.11	212.79	380.15	424.8	411	584.5	522.19	587.65	416.3	312.31	448.59	663.4	505.7	378.21	436.09	401.25	388.92	398.21	334.37	367.73	399.17	428.4	372.99	489.58	534.4	451.02	451.43	376.81	771.37	356.42	534.48	327.46	456.1	356.62	305.17	464.78	262.66	295.25	301.37	284.22
200036_s_at	RPL10A	3533.77	2820.17	4995.68	3058.19	2950.54	3402.4	2325.65	2645.12	4196.08	2305.36	2343.53	3927.69	2910.57	3145.39	3285.58	2966.51	3065.53	1403.22	1674.04	3267.52	3009.04	4142.25	3094.53	2632.22	2066.33	3883.86	2755.57	2910.99	1582.91	2816.05	2558.6	1656.06	3354.65	2799.31	2373.48	2161.62	3049.16	2798.46	2960.86	3254.28	2058.95	1016.39	3100.53	4176.13	5273.03	6468.54	1972.26	3268.29
200037_s_at	CBX3	782.21	762.37	1229.86	1328	861.91	913.91	963.52	1030.83	962.76	1046.14	828.04	898.17	807.79	589.08	768.31	1067.77	1018.79	1053.04	604.92	571.38	1295.95	985.47	1080.06	655.58	1015.23	939.55	880.91	682.47	930.42	468.59	990.55	1122.87	821.58	415.36	805.77	658.55	451.83	875.56	442.7	764.16	749.74	419.21	1590.68	1276.6	1198.76	981.6	782.52	982.1
200038_s_at	RPL17	4393.85	2444.65	6169.34	2993.67	4331.67	2620.29	2404.37	2508.73	5543.5	2224.06	2610.45	4398.29	1951.02	2919.76	4101.63	2791.83	2604.52	1179.19	1360.3	3772.75	4847.8	2991.89	2523.98	2435.72	1413.21	4033.16	2071.79	2853.61	1580.14	2562.13	3931.4	2140.54	3653.59	2866.48	2354.72	3382.95	2707.13	1873.41	3900.16	4153.29	1871.28	743.89	2822.94	1660.39	3806.76	4723.64	1694.56	2993.68
200039_s_at	PSMB2	1695.15	1520.43	2622.15	1598.79	3034.5	2546.41	1407.21	2006.28	2085.72	2551.76	2127.94	1101.4	2597.83	753.53	1508.56	2297.34	1843.51	1971.97	2289.56	2026.82	1522	2030.29	1343.27	1598.94	2372.31	827.15	1217.67	1583.13	810.34	1908.13	1349.9	1858.46	1371.08	815.14	1589.14	1687.35	1412.41	1449.32	716.93	1676.02	1438.7	1755.53	1527.23	1787.79	1351.12	604.47	1317.02	1069.65
200040_at	KHDRBS1	1064.04	1147.96	916.98	1110.62	1072.51	1164.76	1062.29	1130.07	1206.9	1068.23	964.2	879.12	1150	792.92	887.37	1153.67	1142.1	1163.25	1280.37	826.27	1378.57	1573.16	1115.42	1240.22	955.55	862.56	944.12	918.59	1397.64	1131.29	1044.94	1149.69	773.46	969.95	1117.87	913.1	791.95	822.97	888.22	1027.91	1519.58	999.74	1158.2	1117.18	992.99	986.04	1293.41	980.31
200041_s_at	BAT1	1868.96	2290.56	2246.59	1628.39	2702.84	1601.77	2234.55	1807.41	1547.35	1289.11	1649.95	2323.69	2247.4	2424.19	1771.89	2174.17	1416.92	1604.37	1869.95	1558.4	2199.62	2808.85	1822.61	1462.99	1461.15	1320.69	914.9	1776.11	1980.21	2033.72	1570.3	2236.12	2066.25	2318.12	2420.63	1848.78	2913.48	2755.9	1450.82	1633.59	3910.73	1897.71	1512.51	1598.65	1522.68	1431.03	1409.25	1506.31
200042_at	HSPC117	612.3	318.95	539.03	417.71	511.76	502.75	428.11	301.87	718.24	574.34	495.21	422.97	385.78	323.97	367.21	639.08	420.46	804.43	470.93	738.13	493.23	422.56	619.7	538.49	387.19	442.99	488.96	461.38	378	400.29	1305.26	252.12	427.5	421.72	305.61	398.3	489.7	357.12	313.43	830.01	258.42	421.27	500.03	376.29	601.18	514.68	486.74	342.93
200043_at	ERH	1124.22	1050.69	1065.36	1373.74	1501.72	1498.53	1246.73	659.77	1233.99	647.81	1326.19	1134.24	894.66	847.55	894.38	1186.01	1094.04	691.92	907.67	1123.39	1363.37	817.32	559.23	667.25	1256.24	695.21	873.64	950.6	621.08	763.17	1942.65	1096.74	1274.55	822.35	775.13	1202.74	818.73	639.74	1021.77	1369.45	1979.6	483.73	947.09	1588.54	1044.53	1262.45	716.51	1446.87
200044_at	SFRS9	762.12	643.27	506.84	889.13	663.49	1363.58	738.37	1028.05	591.69	818.52	586.45	559.87	761.3	521.69	715.27	751.16	1354.38	425.98	625.03	675.53	748.04	740.22	572.56	449.55	461.01	714.8	613.89	697.45	617.27	858.67	883.81	481.46	523.53	477.15	733.46	506.12	598.74	589.87	582.8	616.4	966.61	509.2	640.65	637.63	882.46	747.83	1368.13	848.77
200045_at	ABCF1	404.96	523.62	583.61	371.45	825.24	602.83	429.79	278.82	349.78	574.64	400.89	448.43	535.15	286.58	441.38	556.31	409.48	479.53	411.91	337.16	612.65	696.21	524.9	450.49	577.05	296.76	320.71	405.15	482.25	413.54	368.46	502.87	400.19	327.11	581.43	373.17	948.95	319.64	375.42	462.28	567.03	620.51	447.33	477.65	402.73	387.8	334.81	412.64
200046_at	DAD1	971.25	591.13	405.74	665.07	1047.17	654.51	282.99	378.45	699.45	484.55	667.79	382.03	729.35	464.81	716.42	438.03	501.72	406.39	740.47	930.77	428.34	606.52	362.68	279.33	549.2	785.86	658.59	728.96	323.7	878.09	781.22	533.94	575.67	602.39	492.04	988.32	634.29	783	465.8	850.84	395.49	473.59	731.66	653.78	827.21	1023.09	1026.63	937.76
200047_s_at	YY1	880.8	762.83	779.91	1068.55	883.24	1000.61	808.14	1022.86	749.35	942.95	1050.28	840.96	739.5	594.51	659.53	1005.41	885.02	909.62	1002.32	814.42	1006.56	1645.58	730.38	893.87	864.64	770.83	841.67	759.19	1287.33	954.97	1096.84	529.75	486.51	688	601.55	702.4	551.14	684.73	615.59	933.84	1361.13	847.47	895.99	1154.4	721.74	903.78	1124.62	1330.26
200048_s_at	JTB	2402.15	2377.14	1398.11	2174.05	3526.48	2304.41	2346.96	1871.52	1576.06	2404.54	1492.99	2561.69	1486.81	1488.86	2669.72	3746.04	2531.9	2363.27	1895.12	3031.2	1926.14	1317.25	1336.01	976.64	1718.14	1828.3	1612.79	1974.29	2232.38	1377.54	2900.99	1537.85	2722.5	1227.04	1111.78	1806.84	2083.03	2346.17	1137.43	1611.68	1668.8	2251.43	1586.31	2061.44	2403.73	1818.18	1442.41	1691.31
200049_at	MYST2	201.82	286.16	169.77	179.99	250.76	253.75	197.08	282.7	285.07	174.44	180.19	257.04	168.51	146.02	231.25	238.82	368.66	201.81	264.69	243.35	218.41	268.27	172.7	137.62	239.74	220.69	150.3	289.94	188.27	299.64	253.23	307.45	163.47	190.11	255.36	328.93	240.47	336.69	142.62	179.91	340.1	148.63	276.73	315.42	218.58	237.3	214.79	301.74
200050_at	ZNF146	766.83	650.86	982.45	1157.74	820.66	917.97	918.2	742.27	1012.17	771.98	970.16	961.06	955.78	577.52	518.79	1066.66	660.42	1187.03	786.08	758.34	897.92	882.66	937.93	481.73	1044.15	779.12	586.6	767.61	1327.94	846.59	657.43	950.63	480.9	571.69	730.06	376.63	455.51	616.9	580.37	891.22	1156.82	1069.58	1000.28	1881.1	940.61	497.21	769.02	886.34
200051_at	SART1	178.22	194.28	154.55	146.23	139.86	170.81	241.57	141.09	254.67	178.93	159.17	208.01	204.55	143.45	134.67	205.33	191.61	123.14	188.01	157.31	218.49	220.22	222.24	246.58	190.52	203.6	123.42	128.47	137.31	198.85	122.22	314.75	174.19	165.68	175.78	172.51	248.94	152.65	166.69	117.06	393	291.8	180.19	329.36	105.22	138.34	168.16	140.38
200052_s_at	ILF2	1348.48	410.82	676.01	1240.15	2555.61	1112.01	1054.74	755.17	889.49	1624.92	777.56	1454.9	584.68	364.42	855.13	3345.8	1321.61	1319.81	1178.4	1091.5	1552.27	1308.53	822.82	465.54	1267.8	1271.79	687.07	621.13	654.87	1164.89	1528.13	683.88	900.02	478.98	640.55	679.14	940.61	741.48	213.76	1749.89	950.08	672.17	825.79	1651.95	1061.29	928.84	778.92	1153.26
200053_at	SPAG7	338.79	246.74	263.26	241.35	277.62	260.1	257.42	190.13	225.31	203.13	283.27	331.44	197.41	320.33	324.7	235.3	196.92	180.95	224.88	252.36	230.63	252.87	246.09	222.7	246.57	239.61	395.12	292.19	175.33	269.57	174	257.83	218.87	395.84	365.29	325.99	314.01	188.59	291.91	348.04	226.87	146.16	243.38	289.76	242.29	318.45	204.46	228.21
200055_at	TAF10	627.84	748.62	562.36	745.25	613.3	1073.22	688.47	1587.98	530.64	501.65	562.9	923.78	551.59	801.62	1149.27	1058.71	950.64	407.98	605.02	870.63	465.56	440.78	344.51	581.7	800.77	964.69	445.38	598.02	651.43	749.8	571.12	817.34	1185.85	537.43	845.87	775.62	944.45	738.96	641.97	535.52	1985.08	614.73	677.52	515.46	457.18	612.76	727.22	763.27
200057_s_at	NONO	3038.56	3923.73	2754.71	3870.24	2279.55	3000.51	3563.03	3231.45	1867.07	1683.46	2415.95	2982.57	3066.64	2477.7	2468.14	3159.99	3981.01	3124.46	2551.04	2519.58	3690.04	5016.07	2336.79	2921.87	3601.92	2458.29	2477.64	2039.17	3458.06	1375.59	3148.38	2896.61	3311.6	2516.12	3305.36	2832.81	3455.51	3012.19	2147.77	2905	5599.61	3381.72	2264.13	3451.26	2595.53	2782.41	1716.46	3191.31
200058_s_at	U5-200KD	832.13	1040.66	975.08	919.94	1402.56	1756.49	798.71	1255.12	846.5	985.48	857.97	876.88	1059.25	815.95	783.85	897.81	814.81	925.86	813.47	719.82	918.67	868.69	1220.61	1194.8	727.09	1063.41	1535.08	997.49	1117.17	836.95	743.81	1352.61	895.4	1193.12	1146.85	1016.81	1346.32	966.84	899.94	868.27	2214.2	1063.39	1007.65	1030.85	611.3	888.01	1276.39	908.86
200059_s_at	RHOA	4168.87	3567.04	3224.51	3325.99	3591.28	3531.06	3176.86	3703.33	3831.3	3559.36	4862.7	3219.59	4077.52	4419.31	5523.42	3771.34	3008.68	3710.66	4035.94	4130.89	4245.1	4762.12	4608.36	3520.48	3774.54	2768.22	4438.34	4386.81	4262.29	4060.89	4420.65	5868.41	3797.27	4174.49	3090.23	3744.32	4945.43	5716.28	3475.64	4583.89	3547.51	5001	3621.83	3242.05	3938.59	2846.14	4265.37	3752.28
200060_s_at	RNPS1	750.37	1053.85	2551.63	851.53	1030.67	1477.72	1042.41	1605.01	904.4	1711.67	821.23	1228.85	1352.78	825.89	1246.54	1092.43	1048.27	819.25	1646.79	998.62	1303.94	1334.59	1190.45	1099.98	1105.83	1035.24	664.11	960.14	1142.24	1099.07	1153.58	1483.53	1202.7	864.55	1316.58	1173.46	1062.88	877.06	871.41	869.49	1542.67	1023.27	947.82	966.86	927.89	1302.32	1123.78	1286.74
200061_s_at	RPS24	8050.93	5464.65	8154	7154.93	5901.8	8832.1	5851.68	4740.11	6086.82	5981.33	6400.52	7886.18	5415.11	5537.3	6159.21	5242.61	9920.79	3577.35	2934.92	6813.25	7345.46	6501.57	5618.41	5591.86	3999.8	8221.37	4209.89	6586.19	3122.96	5866.24	6154.5	6047.28	7902.23	6178.63	4829.78	5201.39	5404.05	6071.29	7745.13	13131.4	4816.2	1399.78	6657.07	8898.25	8300.82	7332.03	5780.96	7467.09
200062_s_at	RPL30	6507.49	5155.11	7237.81	4907.92	6372.7	5836.23	3645.55	4247.12	6419.5	6659.44	5665.85	6098.33	5086.71	4041.11	5261.24	5224.92	7447.57	2790.77	3771.59	7948.86	9045	5868.03	4988.94	2815.91	3915.14	5909.11	5437.26	7356.2	2975.07	6388.17	8608.69	4042.03	6332.11	4612.61	4835.29	5195.25	5806.6	6861.93	4955.49	10115	2697.82	1041.01	8365.69	7777.05	7555.78	6834.42	8884.5	6650.25
200063_s_at	NPM1	3821.53	3933.45	5273.53	4236.84	3679	3483.27	4335.64	2978.05	3818.56	3971.64	3578.6	3186	4452.94	3060.76	3895.55	3889.3	3725.11	2524.39	3706.18	4494.54	5237.46	5275.08	3713.28	2361.76	3448.23	2863.36	4057.22	3095.97	2608.91	4128.5	3808.59	3179.94	2885.86	4612.74	3861.02	3111.09	5089.28	3556.56	4171	4066.39	2885.75	2769.63	3408.28	2186.46	2985.95	4642.67	3965.02	2548.72
200064_at	HSPCB	3465.61	4516.25	4367.62	3228.57	5254.58	3913.52	4082.1	3817.94	4199.52	4497.42	2663.77	3567.8	4501.09	2230.3	3268.37	4149.82	4049.68	2454.26	3576.82	3515.74	4980.13	6436.17	3459.66	3524.47	4612.02	3294.01	3609.14	3533.23	3583	3110.41	4514.26	2953.56	4199.07	4787.95	3354.01	3078.55	4592.58	3159.07	1643.06	4448.17	4820.98	4302.93	3932.4	3496.7	4504.77	3592.81	4118.3	4431.26
200065_s_at	ARF1	4014.19	3416.64	2877.62	3269.33	4687.73	4063.02	2509.83	3618.19	2958.16	4426.14	2855.71	3734.27	2997.24	2119.01	5604.43	3568.54	4429.77	5635.24	5717.66	2690.71	2351.31	2821.43	2820.97	3377.53	3993.99	4009.82	4048.3	3421.82	3301.4	3438.88	3276.59	3672.12	4527.49	3133.51	2662.46	3524.22	3963.92	3192.93	1480.36	3544.59	2523.53	4153.26	3263.44	4307.5	3918.95	3402.65	3710.64	4775.6
200066_at	IK	428.27	448	437.6	396.47	439.31	451.03	532.8	398.61	481.84	361.02	468.92	319.36	336.67	433.63	567.36	447.9	436.34	399.6	363.24	479.1	533.5	506.73	460.72	290.97	369.01	330.29	429.97	337.09	350.64	349.65	466.6	338.48	377.66	465.89	533.05	492.93	509.79	645.29	524.46	304.8	428.24	242.17	506.14	424.53	288.89	443.72	538.04	394.74
200067_x_at	SNX3	1403.05	690.83	881.36	1233.28	458.73	1267.6	637.19	577.61	878.31	662.25	1253.55	852.63	523.11	778.81	952.43	528.96	757.29	792.6	703.61	1544.96	595.78	1552.66	710.96	593.36	759.08	1431.89	959.71	1160.84	591.24	742.31	1119.05	1605.11	1017.15	624.05	620.87	785.96	811.27	553.34	933.09	1206.22	484.85	995.26	722.38	658.54	742.13	967.85	779.68	762.59
200068_s_at	CANX	1966.47	2576.55	2087.5	1971.1	2087.14	2541.14	1977.79	2803.27	2204.44	1828.29	2030.6	2620.09	2215.57	1910.85	2876.35	2665.75	2216.17	1864.64	2930.83	3070.12	1957.01	3644.1	2002.1	1616.58	1663.36	1947.55	2498.41	2785.48	2512.69	1716.06	3253.21	2880.18	2725.48	2871.16	2365.88	2773.94	3530.8	2469.95	798.49	2539.4	1606.76	2153.01	2072.81	2994.71	1746.59	2335.13	4430.76	2106.25
200069_at	SART3	275.87	228.89	326.43	225.62	228.21	280.43	243.97	256.08	177.06	271.36	268.72	312.41	258.76	182.72	195.86	301.5	264.53	244.16	221.48	179.23	376.03	271.68	284.24	201.56	216.13	218.72	160.39	217.6	229.38	278.47	196.21	165.92	138.57	197.91	252.03	152.17	183	209.16	370.05	190.08	415.46	155.77	288.44	270.56	215.38	204.46	183.58	188.94
200070_at	C2orf24	258.65	239.31	270.69	204.21	193.75	187.45	237.87	290.24	174.48	208.41	250.7	181.96	246.16	208.11	215.39	252.7	279.93	190.68	227.59	244.23	242.21	223.15	168.92	199.08	255.07	251.1	200.12	327.63	268.46	237.47	207.62	251.39	200.6	209.69	149.41	228.45	194.3	277.45	319.74	206	177.69	525.52	242.69	464.1	295.83	205.89	345.1	287.07
200071_at	SMNDC1	508.76	302.44	404.2	418.84	317.38	482.07	326.08	251.58	371.9	408.03	400.77	341.21	453.19	276.64	253.21	374.29	404.43	347.23	298.89	292.95	660.25	745.68	423.4	250.7	288.37	387.46	358.75	335.77	681.08	325.85	297.06	272.82	327.86	275.35	197.38	287.46	264.46	213.01	243.74	343.17	340.61	302.44	522.65	448.71	371.04	270.87	522.48	380
200072_s_at	HNRPM	811.33	1185.33	873.42	981.46	1391.14	846.61	1068.81	1056.64	1246.38	1047.66	852.82	912.66	1258.7	919.56	862.04	1370.75	1056.42	816.63	983.15	728.08	1665.57	1410.88	1188.21	915.61	811.52	854.49	956.93	811.72	1186.03	1250.97	901.34	912.31	740.31	1120.9	1649.99	904.68	1041.23	1034.54	778.37	917.6	1943.49	998.99	1078.16	1268.84	836.34	849.78	973.93	1060.22
200073_s_at	HNRPD	1367.42	1783.92	1018.03	1599.27	1930.47	1329.95	1865.17	1410.25	1548.74	1791.39	1691.17	1435.91	1787.84	1085.92	1085.57	1752.79	1208.41	1234.85	1385.26	857.94	1809.13	2019.61	1790.66	1611.51	1610.27	1052.69	1336.62	1352.59	1672.4	2016.94	1054.07	1431.38	819.2	1037.64	1875.92	1665.25	1283.46	1133.31	1471.9	1243.88	2182.96	1304.46	1359.51	1510.77	991.49	990.11	1389.52	1330.86
200074_s_at	RPL14	2481.3	2367.12	5763.31	1907.59	2656.8	2393.67	2368.95	2483.06	2806.79	1933.26	1855.54	2225.63	1643.01	2552.09	2404.95	3699.98	2944.64	1409.59	1464.59	3093.14	3024.55	3145.78	2900.68	1614.71	2227.26	2871.88	1907.29	2076.88	1109.58	2360.06	1837.04	2442.64	1741.3	2176.17	1248.07	1500.08	1934.4	2915.05	2950.69	2978.04	1845.78	1558.93	2513.48	2569.59	3676.1	4780.6	2232.58	1404.92
200075_s_at	GUK1	769.7	789.26	605.48	635.48	837.05	969.01	375.45	480.7	416.91	559.7	527.93	730.63	432.08	615.25	630.47	562.9	843.22	671.28	644.97	574.63	426.03	406.14	440.75	437.9	486.59	679.93	588.24	897.31	391.72	551.7	603.8	680.03	768.36	523.4	469.24	760	786.9	626.47	269.7	909.15	545.84	525.96	477.87	737.08	869.26	644.09	506.1	706.02
200076_s_at	MGC2749	268.85	419.01	357.35	279.86	247.78	283.96	246.79	422.19	306.36	282.8	209.45	264	373.1	232.7	287.83	265.59	257.59	396.65	481.04	344.7	389.64	283.63	312.3	418.57	332.88	289.53	395.68	290.71	190.09	332.13	224.81	265.37	198.77	261.68	305.59	358.37	290.18	258.5	177.21	284.53	277.23	328.36	280.33	432.29	347	316.09	233.9	447.23
200077_s_at	OAZ1	5362.64	4450.12	5047.47	3580.17	4004.75	5114.83	4979.62	4189.7	5625.18	4303.63	5403.21	4271.15	4108.27	4992.01	5158.68	5701.29	5383.44	4659.68	3865.47	3743.95	3619.07	5106.52	4206.22	4938.51	3948.36	4428.84	5712.26	6318.19	3771.38	4340.68	4356.07	4105.99	4404.69	3700.44	4613.48	4179.41	5685.04	4756.04	5071.91	5249.57	4845.92	3970.62	5088.33	4335.07	4499.63	4287.67	4900.28	4876.78
200078_s_at	ATP6V0B	766.75	333.77	966.51	371.81	566.08	713.1	348.43	398.26	622.48	773.45	454.94	390.2	511.29	417.39	567.85	464.16	533.69	455.12	415.52	786.41	615.88	450.29	472.54	373.52	638.45	429.29	352.2	574.72	409.18	420	476.96	487.78	458.17	368.74	319.96	796.14	512.56	351.76	213.52	892.61	454.78	644.39	698.77	431.99	1085.18	638.87	472.76	415.72
200079_s_at	KARS	959.8	1192.62	1483.17	1199.18	1825.84	1127.29	1523.64	1535.32	1785.85	811.48	1180.93	1403.07	1056.51	847.44	1340.24	1293.14	896.58	877.11	998.53	1591.72	882.98	674.3	1493.52	1227.55	1352.74	1273.07	997.86	844.09	934.78	1572.95	603.59	942.61	1252.09	693.16	812.57	827.54	1106.65	531.37	727.29	882.73	1023.25	966.19	652.5	545.85	1001.85	589.42	1220.66	973.89
200080_s_at	H3F3A	4788	4411.96	3499.04	4945.01	4126.6	5284.73	3749.48	3696.97	3478.12	3459.85	3740.72	4226.18	2975.32	3695.8	3287.59	3051.55	4015.93	3759.23	3899.33	2325.73	4331.95	5074.89	4727.31	2944.48	3333.31	4926.08	3896.66	4073.18	5007.93	3529.95	4060.16	3733.19	3674.38	3811.9	4417.16	4867.29	3749.17	4607.15	2483.28	4463.81	3946.76	4130.59	5422.28	4709.39	4489.54	3981.21	4574.46	4076.72
200081_s_at	na	5857.95	3256.35	9912.46	2715.84	4723.55	5034.2	4162.3	2590.15	4810.94	2768.98	2424.35	3291.33	3096.75	3590.34	4282.27	3779.44	4860.55	1031.87	1923.07	4177.61	5442.8	4478.1	3673.52	1988.52	3253.73	3277.11	1633.11	1782.57	1684.76	2388.9	3602.06	3606.98	4351.1	3153.84	1670.69	2935.65	3356.61	2554.73	3121.46	4915.65	2635.27	2079.49	3383.44	5235.73	3218.75	6294.02	1997.12	3224.53
200082_s_at	RPS7	4035.49	1774.63	4824.91	1897.75	3692.51	2793.1	1487.61	2104.6	2808.54	1904.33	1701.71	2212.71	1874.97	1918.09	2188.51	2219.15	2405.64	662.16	1302.19	2290.81	2428.29	1964.88	1942.12	1743.16	1220.22	3689.36	1369.86	1939.68	901.17	825.39	2014.37	2618.79	3693.46	1844.69	1852.28	2089.43	2024.15	1504.66	2703.94	4091.06	1401.05	493.02	1655.52	3074.6	2409.97	4306.21	1060.87	2344.33
200083_at	USP22	364.06	576.38	599.4	546.13	260.87	514.52	611.22	625.24	381.5	474.89	359.58	452.85	531.73	705.51	458.85	634.67	330.37	528.14	283.37	433.02	657.66	916.19	966.75	707.56	457.66	949.43	1112.81	831.38	550.6	624.63	763.81	668.01	446.7	834.21	762.47	343.07	841.13	881.62	679.74	432.38	952.47	733.43	343.16	542.74	378.57	550.12	534.88	381.28
200084_at	SMAP	1010.19	578.36	615.98	520.84	536.88	801.72	524.29	681.62	638.66	731.95	974.48	523.93	731.14	569.74	681.65	788.87	843.87	691.92	485.66	516.97	690.83	759.72	765.99	402.84	465.37	930.85	593.4	523.03	387.3	647.39	790.14	687.15	894.31	633.57	643.43	1222.88	530.97	657.65	409.31	520.21	916.85	552.51	737.45	1033.25	856.85	419.92	741.24	646.9
200085_s_at	TCEB2	684.65	857.24	1279.88	857.88	1028.96	1590.72	624.81	987.76	953.2	936.28	803.52	831.2	832.16	790.58	1079.15	778.96	657.6	537.08	585.68	1099.87	990.52	753.7	987.91	476.69	840.6	1523.98	727.42	1275.36	570.42	1027.31	1124.87	565.59	687	636.19	1026.21	608.59	844.05	1145.47	555.73	1293.32	430.58	357.32	743.8	955.19	993.83	1677.78	1261.12	1120.57
200086_s_at	COX4I1	1037.76	1045.56	2044.04	1427.36	2089.73	1498.62	917.79	1158.08	1840.08	1217.12	1235.29	1027.2	884.3	1062.73	1153.93	854.78	811.07	703.08	671.3	1322.51	911.38	709.77	1078.93	1148.97	1361.64	1513.04	1107.13	1841.34	804.9	1535.76	810.88	680.51	1217.61	885.43	607.14	889.6	783.82	682.32	1021.13	1226.7	859.67	1049.65	704.2	661.52	1613.34	1036.6	1326.57	885.1
200087_s_at	RNP24	1812.98	1086.64	1193.03	1577.92	1136.44	1850.16	1362.11	1683.34	852.22	1366.79	1307.8	1263.3	2065.14	1430.38	941.78	1383.14	2345.21	1124.66	1001.45	1430.24	1805.89	1705.88	1477.32	1127.1	825.55	1731.4	1100.98	1774.15	851.39	2178.58	1762.81	961.55	1601.01	959.5	1140.87	1139.49	752.15	1457.67	839.53	1957.87	1130.45	947.12	1718.14	1168.6	2019.8	1788.2	3139.58	1777.92
200088_x_at	RPL12	5622.88	5764.12	12809.5	4277.03	3942.86	6311.59	4268.94	6117.65	9608.45	6048.26	4435.38	6355.34	5074.98	5346.13	4912.12	4968.08	5085.01	4587.17	3131.21	6712.59	8523.78	6168.95	6148.31	6208.63	5616.71	6332.96	4327.71	4896.04	3377.12	6241.73	5847.36	3215.95	6047.35	6064.48	5360.74	3704.87	6104.58	5203.84	6812.62	7329.65	3810.07	2667.37	6795.74	8211.86	5891.69	9472.9	4992.91	8396.05
200089_s_at	RPL4	2890.53	2111.26	3679.44	2661.6	1556.3	2165.81	1830.8	2019.37	3037.41	2021.45	1778.78	2717.77	2689.79	2546.47	2013.8	1919.14	1764.8	996.55	1613.89	2030.13	3225.93	2361.01	2020.15	1809.52	1575.29	2616.18	2227.2	1792.25	1059.05	1928	1552.42	1071.16	1642.92	1948.19	1721.73	1685.3	1701.61	1829	2664.93	1889.42	1352.36	747.05	2154.13	1797.07	2109.38	2850.01	1330.64	1403.6
200090_at	FNTA	1784.64	830.98	1689.24	1366.09	1470.72	1751.25	895.94	900.66	1376.79	1687.66	1124.21	1107.42	1075.71	962.66	1292.65	1517.55	1061.09	701.28	1105.92	1024.04	1515.79	2341.18	1129.77	603.31	1115.95	1459.45	668.64	622.99	714.37	816.18	3979.6	1133.61	1326.2	862.4	1093.49	698.46	1041.81	1324.5	738.16	806.33	816.75	929.53	855.7	2071.44	1046.97	1427.7	1333.17	989.45
200091_s_at	RPS25	2762.26	2711.03	4517.84	2852.54	2429.55	3982.83	2234.29	1675.5	3298.26	2141.44	3155.83	2923.39	3034.34	3011.73	2166.81	3515.61	3562.83	1312.58	1581.59	3499.93	2575.01	2597.1	2781.07	1571.55	2030.52	4035.07	2779.94	3445.42	2502.38	2577.1	2097.87	2231.6	3001.01	2331.87	2000.88	2520.64	2717.29	2726.53	4149.8	3344	1252.01	801.38	4299.37	3760.87	6108.34	3679.04	1875.49	2150.58
200092_s_at	RPL37	7877.62	6634.95	9474.58	5375.54	6320.51	9601.31	6987.89	8108.31	6761.88	7934.68	6345.61	8208.54	5146.68	6542.77	5792.07	6847.9	8481.18	6809.2	5955.88	6218.03	8641.95	9460.82	7446.07	7553.14	5302.04	8200.49	5319.51	7327.45	8369.45	7308.6	6172.87	5310.85	6121.1	6778.28	5990.47	5953.03	6857.63	6898.66	8345.88	7872.36	8261.16	4672.67	6729.05	8815.86	8458.76	8325.45	7897.48	6337.05
200093_s_at	HINT1	590.95	427.64	712.54	523.39	742.46	704.54	290.73	289.4	547.93	314.25	484.68	331.97	408.92	302.21	393.93	400.49	436.15	398.42	218.11	566.68	536.24	718.05	398.95	216.4	274.93	327.79	403.86	622.87	209.06	283.82	766.83	363.04	477.45	287.11	495.75	928.61	317.68	715.47	376.9	805.23	289.73	171.99	485.31	374.81	623.68	883.54	488.78	242.56
200094_s_at	EEF2	4717.51	3974.88	6966.39	3077.08	3809.35	3294.27	3808.26	3144.7	4848.09	3438.66	2570.57	5303.63	4447.05	5583.52	3437.97	6049.78	6584.55	3023.5	3473	2406.02	3875.64	4450.21	5169.4	5943.29	4138.64	5756.5	3947.7	3800.19	3602.12	2998.13	3372.27	4335.06	3989.13	4935.58	4580.75	2175.75	3981.24	4108.69	5011.27	4052.79	3884.78	3030.84	4320.36	4816.13	6344.2	7033.13	4315.02	3083.79
200095_x_at	RPS10	5668.96	5106.57	9341.81	3403.13	6153.94	7039.43	4549.28	5259.19	4578.25	3877.39	3834.39	6698.74	4127.81	4537.97	6084.45	5095.91	5387.63	3398.89	2796.58	5786.13	8384.37	9198.14	5860.09	3209.19	4555.76	6260.06	2993.57	4975.49	3380.85	4706.3	4706.96	3311.52	5384	3574.19	3957.93	4650.38	6348.83	4025.75	5655.89	7565.14	4682.82	3118.84	4220.36	5100.19	8195.43	7010.52	2924.57	4455.47
200096_s_at	ATP6V0E	1595.07	942.92	1556.31	1584.75	1133.25	1844.84	1252.4	874.83	1331.98	1187.39	1905.92	1120.81	1662.07	1278.75	2209.09	1023.27	1047.71	1266.36	969.83	2067.24	892.23	817.24	1003.37	627.61	1262.14	857.18	1785.02	2134.57	903.7	1088.25	1641.69	1011.6	1437.84	1198.62	900.77	1301.19	2155.78	1098.81	1236.96	1722.04	388.28	743.12	1648.58	625.96	823.68	1490.04	1831.62	1129.69
200097_s_at	HNRPK	1311.56	1269.85	1196.04	1185.36	1149.41	908.96	1019.93	1143.11	1184.42	1019.24	1318.08	1166.78	1164.99	1089.28	928.18	1158.41	851.99	1244.17	1314.89	957.15	1399.22	1598.16	1493.39	1209.97	1313.25	1196.82	1229.86	1133.23	1430.7	1468.8	1212.43	1211.87	748.04	1192	1314.68	870.23	898.84	1295.24	822.57	1155.49	1072.23	1215.58	1536.18	1186.33	942.61	1230.23	1520.97	1114.56
200098_s_at	ANAPC5	1223.02	834.21	996.7	935.99	774.17	1067.8	1089.74	1127.14	786.1	719.3	763.57	852.93	804.39	1098.3	854.2	889.79	2025.72	872.14	624.88	991.24	1203.36	1122.42	825.26	724.04	760.31	968.84	605.95	812.88	561.96	1611.46	715.71	731.23	838.28	811.44	822.88	597.78	862.73	938.66	1038.04	750.77	1519.22	544.77	791.67	778.43	1198.27	650.31	2563.91	783.47
200099_s_at	RPS3A	3995.6	2584.51	5345.74	2554.59	3190.39	3323.54	2311.95	2099.97	6077.25	2694.35	3678.67	3232.73	1424.46	4429.51	2661.9	2713.99	3119.22	1354.45	2347.79	5837.7	3527.12	3508.46	2852.61	2217.76	2058.89	3934.97	2415.32	3544.95	1123.29	2894.98	3728.99	2514.1	2928.65	2630.31	2926.96	3160.69	2595.56	3205.51	4004.87	6008.55	1944.96	595.1	4191.2	3101.03	3992.61	6967.81	2471.81	2645.37
200593_s_at	HNRPU	793.18	1201.55	855.81	1197	1416.75	954.98	1066.18	786.55	999.3	1020.56	763.34	942.78	1224.98	630.62	877.01	1423.13	1328.95	901.08	973.6	876.3	1222.09	1667.61	1097.37	617.24	1091.3	925.13	811.6	611.44	1125.46	1057.1	997.63	1027.73	767.76	883.58	1219.57	905.03	1185.25	969.67	515.51	752.59	1802.38	847.05	1336.34	1642.38	862.14	687.8	934.26	1471.99
200594_x_at	HNRPU	1751.63	2311.58	1717.22	2136.53	1700.05	2125.29	2233.32	2106.2	2101.17	2194.81	1883.86	1983.09	2431.01	1496.73	1269.48	2508.28	1938.28	2354.61	2360.08	1514.41	3277.89	2894.46	2273.91	1732.33	2263.34	2279.1	1393.84	1676.2	3171.57	2388.92	2644.54	1974.66	1679.8	2115.99	2832.13	1938.52	1536.3	1870.83	1672.66	1674.98	3189.83	1944.48	2584.12	2928.71	2761.83	2024.73	1858.54	2484.03
200595_s_at	EIF3S10	904.52	780.26	1024.79	711.04	567.41	1341.33	922.83	493.71	534.86	765.45	1355.98	1021.54	1488.02	784.3	446.52	920	792.73	520.42	659.62	759.94	1778.22	1247.4	737.94	564.96	561.37	736.98	549.33	635.1	1537.62	778.09	591.85	660.48	757.1	746.52	380.83	537.01	481.92	743.84	651.89	666.24	828.48	855.94	810.73	729.42	703.98	530.82	957.8	1185.84
200596_s_at	EIF3S10	600.74	650.17	739.82	426.74	628.46	691.19	853.19	882.77	1138.12	1260.42	775.65	716.66	810.18	511.86	530.9	595.66	722.07	639.2	467.66	504.18	1023.1	848.83	1371.28	989.4	1052.65	1205.23	768.39	350.33	823.4	481.74	428.9	620.91	698.66	651.03	394.87	407.4	623.88	658.47	1156.07	401.12	754.37	517.49	515.32	545.36	1024.67	842.98	517.19	1058.74
200599_s_at	TRA1	2621.88	2843.5	2338.75	2073.03	3297.01	3389.11	2715.99	2836.93	1909.46	2717.64	3215.76	3387.12	3609.27	2648.05	2878.45	3200.72	3036.02	2102.83	2022.24	2564.24	3055.68	4703.99	2130.36	1699.17	1430.09	3348.23	2031.42	2746.36	2721.91	2585.25	2772.03	2024.76	3311.43	2319.82	2943.57	3265.85	2103.74	2535.96	2211.13	2811.19	2675.35	1791.36	2472.66	2564.68	3580.35	2362.77	3201.99	3477.09
200600_at	MSN	1444.63	1882.84	1099.5	1481.9	1296.57	1323.14	1894.7	1596.16	1261.25	974.26	1930.7	1290.76	1852.98	1816.43	1209.59	2438.44	1645.86	1979.11	2100.18	1983.99	1797.77	1629.68	1043.82	1282.08	2562.27	1681.05	1123.52	1254.34	910.57	1966.48	917.12	1413.19	1374.86	1143.18	1286.07	1739.16	1429.03	930.17	1456.8	2065.41	1353.07	856.81	1127.68	1107.87	742.24	505.82	817.97	986.03
200601_at	ACTN4	529.83	708.75	780.92	575.2	822.06	793.05	687.32	808.72	495.89	368.52	678.47	567.3	1239.17	738.35	1791.66	754.29	674.16	796.51	1211.37	849.67	894.2	449.71	463.14	551.27	859.11	684.93	469.6	520.19	1685.24	701.23	506.79	1201.37	544.24	721.69	685.84	521.68	1218.32	684.76	254.75	905.02	1000.34	1379	298.27	939.6	260.49	295.7	423.04	638.57
200603_at	PRKAR1A	1044.05	1506.07	904.36	1567.29	1101.3	1205.39	1077.04	1617.07	907.14	1828.38	2015.37	1111.05	1964.29	1761.94	1119.7	1147.04	951.69	769.82	1249.3	771.13	1120.82	1684.73	1400.56	903.56	987.02	1231.5	1453.4	1574.49	3193.51	1580.45	2274.62	1346.12	979.14	1347.12	1066.81	1850.95	920.93	907.81	895.28	1300.28	724.78	1500.3	1710.35	1332.51	1757.67	1219.66	2020.26	1370.72
200605_s_at	PRKAR1A	937.73	1249.2	660.24	1536.36	1207.02	848.09	861.49	1363.9	787.2	1827.58	1692.94	1021.68	2247.04	1542.91	1300.39	1091.19	1057.8	664.36	1339.58	876.13	868.7	1597.26	1313.84	737.65	1032.97	919.54	1132.22	1470	2588.07	1690.54	2349.38	1515.27	1066.58	1506.12	1062.3	1954.73	963.72	891.3	538.51	1127.01	749.4	1513.46	1759.78	1319.79	1237.28	928.33	1962.11	1386.58
200608_s_at	RAD21	862.22	957.78	1156.57	601.84	804.47	633.13	886.53	807.55	802.49	1197.81	817.87	1120.67	968.05	427.96	455.86	957.3	996.94	812.62	1394.61	739.17	1453.51	1739.4	1599.89	961.32	775.17	668.02	530.65	813.04	1191.66	1598.1	754.4	625.84	480.24	420.47	484.65	584.71	933.64	946	413.58	1229.93	1020.36	623.29	1053.22	1391.53	969.21	803	1294.89	725.19
200609_s_at	WDR1	964.46	1020.05	1014.94	1182.08	1203.44	1661.54	1226.17	1620.9	1112.31	952.1	1392.84	1293.1	1465.96	1474.11	1686	924.07	891.1	1157.63	904.52	805.82	1123.44	945.88	1533.47	1096.99	1156.4	972.84	1301.62	1350.88	1175.13	1069.18	1030.07	1122.27	1317.35	1338.64	1403.23	1021.84	1946.63	986.49	1042.82	1617.58	944.56	1577.55	1121.59	972.08	912.23	1190.6	1648.15	1038.68
200610_s_at	NCL	1527.09	1585.31	3226.15	2170.51	1016.98	1798.78	2421.64	1385.11	2597.34	2666.74	1821.16	1848.88	2066.69	1415.75	1184.73	2450.43	2279.27	2429.34	2064.33	1650.96	2632.18	2289.21	2211.95	1776.37	1977.8	1983.9	1826.48	1207.47	1839.14	1668.44	1821.07	1342.71	1224.25	1546.05	1878.8	1727.84	1251.14	1026.39	967.63	1889.08	3096.36	2309.05	2009.01	2803.08	1376.31	1803.74	2094.53	1896.99
200611_s_at	WDR1	759.07	752.26	754.5	1021.13	1391.19	1558.9	1011.28	1405.64	941.89	878.85	901.23	914.32	1423.73	1054.13	1181.5	773.73	811.29	785.26	706.69	857.86	636.6	723.43	1035.68	876.4	911.27	756.21	1067.29	836.16	917.23	1003.78	816.37	770.37	839.06	973.98	1158.11	807.28	1647.38	725.16	655.65	1258.49	1172.23	1258.02	789.93	848.28	765.89	748.19	1523.43	846.24
200613_at	AP2M1	1416.31	1031.27	1218.01	1403.98	1510.28	1281.41	1547.92	2677.28	1289.3	1106.14	1084.64	2100.96	1842.58	1019.75	1637.95	1561.64	883.17	1617.26	1030.18	961.9	753.77	1432.18	907.41	1397.24	1406.68	1318.37	800.11	948.17	1662.12	1056.91	1620.44	1139.52	835.49	1191.2	1146.83	1495.89	1291.97	1436.29	396.61	963.48	1602.97	1942.31	964.43	1292.13	1027.64	1116.41	915.36	1445.58
200614_at	CLTC	2591.84	2747.86	1821.17	3054.96	2589.73	2919.83	1930.99	2652.55	2412.48	2949.42	3318.84	2159.8	3580.61	2138.34	1994.17	2351.31	2765.89	2595.02	3424.81	2933.46	2798.34	3676.37	3463.02	2135.69	2803.64	3057.07	2829.63	3745.24	6951.38	2499.62	3611.63	3131.9	2309.52	3282.13	2773.57	4332.31	2471.68	1680.64	1583.81	2935.66	2257.65	4723.02	4542.27	3567.49	3934.77	2989.42	9224.59	3995.59
200615_s_at	AP2B1	163.68	218.45	207.13	367.97	386.97	222.87	151.18	142.93	121.78	266.4	324.67	177.1	392.29	217.92	282.16	212.92	251.33	367.2	553.41	565.61	153.47	667.11	140.73	242.1	239.32	226.16	202.79	228.34	389.72	203.94	481.92	388.31	223.84	438.37	203.57	381.88	460.97	436.33	148.6	201.19	401.28	528.52	343	514.9	166.04	482.43	1091.23	609.04
200616_s_at	KIAA0152	439.12	394.46	408.58	477.38	378.56	714.68	494.23	1179.6	713.04	1131.54	294.93	340.67	493.54	416.11	410.22	479.01	1497.59	791.87	445.6	596.51	303.63	366.16	762.12	824.78	709.12	1407.06	459.66	348.59	293.62	424.24	267.82	319.65	526.16	461.84	458.47	392.13	353.02	499.07	584.05	326.87	784.18	333.27	246.56	333.61	1416.64	963.5	691.2	564.66
200617_at	KIAA0152	495.57	417.26	533.12	470.34	378.36	828.47	557.75	677.61	298.81	579.27	310.27	502.7	813.75	613.66	613.08	610.78	1045.37	471.29	575.53	427.63	561.49	477.71	379.34	584.25	260.65	770.23	316.53	763.19	519.29	445.06	456	465.74	642.42	573.81	621.46	377.74	457.79	745.33	316.22	403.85	841.46	519.37	217.68	236.44	674.74	640.54	804.7	768.65
200618_at	LASP1	1243.54	1156.35	932.22	1421.32	1074.21	1035.11	1230.71	1162.89	1072.74	517.51	1257.26	1165.81	1026.96	1435.65	1301.93	979.21	704.67	1254.26	1230.54	844.89	979.73	1284	1761.37	1239.81	1283.72	1155.49	1678.44	7755.88	4923.19	1007.25	879.17	4356.43	990.29	1265.34	902.82	1061.22	1409.35	1186.63	1469.14	822.26	1309.02	1406.46	1535.5	1177.86	760.98	2147.27	1528.13	1110.14
200619_at	SF3B2	656.6	630.89	425.67	534.75	583.48	622.09	755.75	521.87	919.24	729.52	511.38	627.45	685.74	402.41	507.46	803.8	783.61	561.02	569.05	543.83	590.73	555.39	780.82	881.16	530.51	645.18	430.22	470.4	445.12	566.04	470.13	856.95	665.75	578.16	611.61	567.86	610.65	595.52	647.19	370.64	1080.77	1307.22	597.96	1021.93	500.3	547.68	688.82	668.23
200620_at	C1orf8	1080.76	544.37	904.91	906.78	825.3	906.79	629.1	723.82	738.77	643.13	1170.35	987.3	863.62	969.33	925.42	681.1	652.89	519.54	545.04	1033.85	941.17	914.86	1112.61	353.2	873.19	904.11	693.4	1327.38	1135.17	898.5	1207.94	918.08	1331.84	841.45	616.27	1878.03	666.16	2336.86	720.66	1205.07	353.99	503.19	1973.83	1069.95	1007.31	888.96	1312.31	1027.8
200621_at	CSRP1	788.14	889.08	777.91	403.73	530.68	1652.22	497.98	1281.1	417.58	438.77	512.94	664.39	734.59	965.01	598.72	364.91	548.17	928.48	726.18	493.33	498.78	360	681.07	747.22	677.92	1112.47	874.99	1029.67	324.87	1397.76	375.8	579.99	1337.32	1272.2	1477.41	486.18	1074.56	806.22	339.29	901.68	311.85	858.89	440.04	536.63	727.79	696.77	728.31	567.98
200622_x_at	CALM3	261.99	328.95	218.67	269.65	369.4	388.01	193.92	374.31	399.72	138.87	365.26	170.36	344.35	220.42	361.27	302.58	287.36	193.16	332.81	781.47	193.1	285.04	112.51	165.39	207.54	172.04	144.88	256.88	186.06	558.7	357.85	183.66	141.19	231.26	236.48	271.03	314.07	289.13	197.49	283.12	419.05	440.7	272.15	332.55	319.42	130.84	616.83	323.23
200624_s_at	MATR3	907.31	673.54	698.86	660.23	414.21	720.89	654.61	510.4	547.28	667.9	952.27	644.32	640.89	792.81	493.43	695.62	587.58	718.57	681.8	664.37	678.87	922.22	594.72	558.62	170.35	531.36	788.12	650.27	891.34	750.92	878.32	758.39	711.82	809.01	881.3	880.32	529.17	791.73	386.06	742.98	1002.68	591.47	1012.39	906.44	595.07	972.79	1057.14	732.86
200625_s_at	CAP1	1668.42	1651.43	2247.64	1621.29	1731.2	2363.65	1581.53	1431.48	1452.59	1053.76	2267.73	1862.81	1929.76	1897.82	1965.82	1518.7	1566.8	1586.51	2025.68	1755.39	1749.96	1612.36	1444.24	1412.77	1788.86	1356.04	1824.71	2134.13	2146.71	1724.14	1369.44	2579.27	1732.75	1808.82	1584.22	2039.74	2373.83	4338.2	2052.49	1857.61	1307.61	2929	2530.14	1603.36	890.43	1719.82	2531.36	1801.39
200626_s_at	MATR3	1046.55	865.69	964.94	779.4	943.52	798.52	750.12	653.87	694.56	566.03	1303.13	885.61	712.14	1000.63	1267.99	787.79	837.71	921.66	706.69	700.3	1091.42	1186.34	731.86	667.69	193.44	706.58	815.06	884.22	1190.38	895.61	942.82	809.57	720.27	941.43	1243.21	844.24	875.72	1018.44	669.17	940.22	1084.62	714.89	1005.69	1109.35	759.79	1069.72	1083.19	934.59
200627_at	TEBP	3443.89	2435.91	2757.87	2701.96	2566.21	2892.28	2300.84	1771.63	2229	1901.44	1800.1	2525.1	1967.7	1708.97	1974.52	2456.93	3131.74	2139.76	2708.9	2745.32	2895.37	4063.67	3005.99	2507.83	1997.89	1584.31	2455.19	2861.03	2299.72	1808.09	2350.8	2315.7	1369.56	2297.09	2308.49	2129.1	2020.7	2350.04	1078.16	2501.04	4051.76	1914.61	2572.37	2143.46	2813.77	2155.59	3905.77	2797.14
200629_at	WARS	2711.42	4349.14	462.19	1374.93	4987.61	539.71	1711.06	2539.71	2360.09	574.78	2886.52	4757.43	1305.41	728.16	4311.03	2861.21	1800.88	1394.52	1068.89	2945.12	809.8	4151.3	826.37	924.17	2465.74	876.04	833.76	520.33	485.5	2528.68	593.15	590.95	467.8	482.37	643.8	679.94	3057.91	726.15	866.24	1039.88	659.3	570.73	1203.2	824.09	377.34	494.58	709.27	716.64
200630_x_at	SET	1857.09	2075.05	2696.52	1453.4	2715.18	1742.1	2699.56	3919.92	2930.89	2619.7	1907.87	2599.55	2306.77	2171.66	2176.86	2179.56	2186.19	4219.29	2592.27	1614.27	2656.95	2779.71	3434.62	3229.76	3337.89	2781.94	2506.37	1628.03	2237.98	2105	2196.47	2430.5	2342.71	1814.59	2741.41	1702.01	2744.7	2333.63	3362.65	1931.11	4712.55	3161.9	2144.17	2634.22	2657.54	2306.87	1473.88	1228.19
200631_s_at	SET	1426.81	1235.65	2455.44	961.7	1454.78	1186.58	1344.08	1843.16	1944.81	1225.86	1325.8	1389.98	1579.57	1045.2	1256.06	1490.43	1162.89	2195.72	1464.46	977.9	2322.55	2466.91	2781.76	1988.34	1852.33	1141.51	1206.9	1529.1	1748.53	1736.5	2011.51	1167.63	1470.14	1605.03	2134.12	1155.95	1455.4	1654.83	1543.05	1290.09	1666.8	1622.92	1664.24	1691.54	1632.06	1667.73	1602.12	942.77
200632_s_at	NDRG1	1748.61	3885.66	1967.14	729.58	2374.43	2652.02	1119.48	3080.14	834	3621.13	1413.33	1862.96	807.28	925.75	1014.97	1722.72	3707.87	2233.59	4850.83	1653.99	1884.05	3197.89	1659.4	3059.14	1203.77	2554.99	683.74	448.15	1786.74	2319.39	8985.72	2771.53	624.42	818.17	3738.38	1162.89	2419.33	1995.24	514.84	5847.39	1814.34	978.76	418.14	7366.88	2409.8	3784.55	1078.33	2508.85
200633_at	UBB	6419.37	4013.05	6252.47	7187.31	8527.28	6295.95	7180.16	7392.95	7373.79	5201.55	8098.26	6000.38	6410.22	5390.99	7219.7	7454.31	5527.29	8316.06	5576.98	7515.03	6530.27	9468.12	7236.04	7612.65	8885.58	7362.4	9259.79	7627.33	6854.47	7057.11	6975.68	6038.41	7094.98	7071.56	7701.14	6966.08	8251.76	5902.52	5566.24	7178.11	7526.92	7156.75	7618.64	7980.26	6465.83	4788.01	7350.21	5960.63
200634_at	PFN1	4200.76	3318.83	2332.94	2982.56	3604.54	3434.59	2902.21	2556.45	2177.79	2011.57	2616.63	2810.52	3024.32	2705.48	3243.63	3197.82	2266.73	1872.38	3974.16	2639.43	2153.62	3061.51	1846.98	1811.37	2427.57	1989.08	2358.37	2199.57	1957.11	3526.47	2012.45	2540.2	2304.33	2378.59	2829.59	2508.42	4280.01	1999.8	2078.87	2787.66	2631.72	3522.97	2185.82	2557.42	2152.69	1557.94	2173.87	1971.77
200638_s_at	YWHAZ	1811	1771.55	1746.99	1611.91	1828.08	2293.52	1564.14	1481.03	1314.84	1463.12	1759.13	1415.41	2357.36	977.04	1492.59	1347.86	2290.04	1835.64	2463.51	1681.14	2606.03	3037.12	1569.26	1333.11	1622.82	1039.35	1118.56	2127.86	2243.64	3055.84	2723.45	1562.43	1598.62	1106.32	1378.84	1792.28	1974.07	1647.9	692.97	3591.46	1715.62	2658.74	3049.62	2483.14	1262.9	1372.12	3147.65	1825.44
200639_s_at	YWHAZ	1928.8	2729.67	2558.8	1977.25	2202.67	2656.05	2026.82	2258.73	1918.45	1867.11	1883.75	1887.79	2351.73	1274.34	1378.8	2049.01	2971.4	2701.72	3140.44	2242.13	3527.66	3065.55	1979.44	1984.94	2262.12	1587.05	1530.25	3163.96	2223.26	3116.09	3389.11	1876.5	2231.77	1520.68	1432.49	1869.44	2388.56	2206.76	1348.01	5069.05	1765.27	3194.62	3665.52	2602.26	1590.51	2042.52	3256.18	2350.39
200640_at	YWHAZ	2100.71	2917.1	2527.46	2084.82	3298.8	2841	2052.33	2307.24	2300.38	2091.89	2058	1906.64	2855.45	1166.04	2175.38	2230.55	3411.74	3343.43	3551.95	2817.31	3442.17	3498.04	2246.27	2078.51	2599.67	1507.51	1756.47	3337.99	2437.75	3752.89	4112.84	1991.12	2501.24	1784.77	1726.66	2019.82	3065.41	2540.36	1192.35	5306.08	2159.55	3992.47	4067.6	3034.61	1521.74	2140.1	4029.59	2953.39
200641_s_at	YWHAZ	1214.82	1095.71	824.55	1042.88	1617.07	1503.08	835.7	788.52	709.1	961.72	953.33	744.12	1996.36	568.69	1050.55	802.22	1780	859.27	1790.27	1312.31	1088.37	2060.97	874.12	789.76	873.56	479.84	691.25	1421.32	1361.71	2209.03	2142.89	994.2	1017.4	816.41	1050.58	1322.33	1548.5	1080.62	180.31	2315.41	947.95	1949.36	2664.75	1695.04	621.98	734.45	2912.54	1696.72
200642_at	SOD1	1627.42	1326.13	1961.35	1419.38	2245.3	1733.47	1061.73	818.16	1666.13	1686.36	2113.8	664.21	1584.23	709.68	1543.93	1221.23	1085.12	852.11	912.66	1840.03	1702.67	2658.63	1268.73	567.5	1623.83	1307.64	1712.79	4133.79	902.35	910.86	2371.43	1257.07	1840.78	1299.46	783.45	1335.67	1630.09	2462.88	661.55	3261.23	2348.41	673.6	1483.91	2463.41	2986.87	1683.67	2188.78	2316.33
200643_at	HDLBP	352.72	645.28	511.65	724.51	359.63	504.32	524.66	1159.16	743.01	315.44	514.04	700.08	876.56	632.29	455.62	1210.44	864.37	989.73	852.81	863.12	436.24	294.69	454.39	1148.74	764.51	989.05	846.03	784.21	690.34	685.74	697.54	554.32	766.31	689	604.44	502.66	555.23	807.1	462.17	615.15	658.28	1019.56	448.89	473.37	889.24	1093.4	786.14	853.65
200644_at	MLP	3657.91	2132.65	1673.87	2120.11	2112.72	1896.29	2037.99	1877.38	2344.42	2354.69	3040.63	2254.92	2673.76	1032.84	1846.56	3041.57	2051.05	2218.49	2285.38	2239.74	1420.65	1213.73	1477.25	2432.46	4328.68	1185.8	1205.39	1656.43	1765.97	1250.51	2400.64	2326.08	2370.8	1973.12	2186.63	881.01	1972.94	1660.55	367.29	2574.03	3365.62	1263.37	1831.28	2126.13	1647.85	993.03	1668.03	2440.39
200645_at	GABARAP	1887.27	1594.38	1485.57	1852.67	1751.47	1400.37	1451.36	1392.45	1320.11	680.27	1519.85	1523.6	1342.72	2024.43	2347.69	1546.91	1618.26	1235.34	1077.29	2290.82	1214.85	1555.35	1382.79	1483.87	1326.2	1977.21	1614.87	1663.12	1326.02	1614.28	1635.59	1567.84	1753.2	1863.87	1860.85	1546.37	2934.89	1546.66	1325.45	1385.39	1255.61	1065.2	1403.48	1500.36	1397.32	1511.22	1364.94	1560.58
200647_x_at	EIF3S8	1968.38	2733.17	3608.45	2848.3	4969.18	2026.76	2239.29	1788.31	1053.27	4497.42	1816.03	2780.36	1719.21	1444.84	1628.26	3650.87	1803.63	2023.04	2228.44	3219.01	2358.13	2216.52	2536.11	3045.64	1783.74	4177.62	1620.49	2474.32	2910	2116.06	4083.43	1203.61	3258.98	1667.78	2155.15	1414.71	2888.89	2639.84	1494.6	1730.34	1721.08	2409.63	2431.74	2412.58	2502.45	2507.06	4095.38	1660.3
200649_at	NUCB1	522.94	631.68	644.53	645.79	704.52	553.68	674.92	742	375.69	258.6	656.77	677.39	686.28	775.8	1036.32	628.64	558.65	508.78	691.4	1299.35	552.92	346.51	281.67	523.71	616.59	507.23	262.54	524	672.41	626.91	366.52	674.21	692.54	595.44	610.8	445.5	848.41	681.65	250.06	581.48	586.34	979.84	243.28	294.58	293.27	266.2	504.2	498.15
200650_s_at	LDHA	3570.75	4723.05	4031.48	6065.71	4772.33	6586.08	2850.74	5932.6	3519.93	5531.28	4420.96	4340.04	5252.79	2556.23	3399.01	3646.14	5624.27	6737.18	4493.22	2842.8	4352.84	6596.12	5098.98	3921.71	3854.98	5135.53	5407.29	2961.96	3471.48	5849.28	5276.23	6616.38	3911.7	3551.2	5636.97	7484.98	4403.19	4480.98	1745.51	4478.85	7817.33	7523.49	2550.8	5712.8	4947.79	4438	6008.44	5843.27
200651_at	GNB2L1	4246.59	4834.67	7840.01	3773.93	3233.72	3882.72	3653.61	5145.25	5713.85	4192.38	3064.78	7267.25	3431.9	4560.22	4201.24	3657.07	4007.71	2536.7	3699.73	4918.54	5076.47	6178.51	4334.14	3397.32	3340.75	4371.02	4205.23	4261.6	2391.15	3229.51	5081.84	3969.46	3992.36	4995.47	3984.56	3539.88	5968.74	4087.56	4954.66	3870.52	3614.18	1998.31	3803.11	3860.65	4370.44	6749.47	5377.27	3570.66
200652_at	SSR2	1630.87	1375.5	1388.23	1129.05	2111.92	1365.49	1221.09	795.34	922.77	1845.16	1114.05	1258.49	1224.01	1052.21	1357.58	1156.32	1753.72	1121.54	1053.34	1821.96	1189.54	1022.1	962.98	1739.36	1265.57	2066.13	1183.63	1114.33	950.8	1094.29	1783.65	880.38	2582.94	1151.42	1378.67	1939.36	1078.43	1106.4	925.88	1452.44	627.31	897.85	1217.33	1806.01	1918.78	2181.11	1025.96	1311.26
200653_s_at	CALM1	932.48	1178.02	1660.73	1270.56	942.71	1832.23	1341.85	3296.96	2025.83	1357.3	1574.94	1110.84	1088.75	1523.51	1524.71	1315.17	977.64	1982.23	1283.08	794.42	1984.27	2105.11	1628.25	1910.5	1599.88	1488.66	1887.53	1415.3	1011.62	1264.94	1332.58	2060.89	1238.32	1687.61	645.31	1397.5	1411.16	1151.59	2382.45	1514.3	1950.56	1958.52	1210.04	543.89	1543.86	1849.29	1462.44	1677.36
200654_at	P4HB	1380.53	2384.32	1313.19	2235.53	2790.39	2260.91	2143.63	2604.75	1433.28	2261.8	1766.18	1781.36	3736.31	2021.04	1977.36	3099.95	2230.39	3246.51	3879.11	3012.52	1523.84	2026.39	2649.11	2406.37	2490.87	2664.13	1987.99	2395.31	4251.78	1613.97	4755.8	2486.27	2495.32	2476.4	2326.26	3348.33	2371.62	1499.32	996.13	1911.29	2070.67	3933.05	2123.4	1969.78	2081.8	2038.32	2007.45	2767.8
200655_s_at	CALM1	1107.55	1464.87	1632.32	1621.27	934.76	2123.94	1308.05	2420.15	1347.86	697.62	1902.4	1192.7	1318.96	1546.74	1469.98	1296.02	1051.96	1230.16	1092.3	779.11	1762.16	2015.45	1099.58	965.58	922.45	1057.72	1259.95	1561.39	1104.5	1356.09	1442.73	1847.36	1490.22	1619.44	814.99	1666.88	1680.89	1307.93	1611.21	1517.54	1690.97	1778.6	1438.82	656.64	1035.01	1122.93	1521.31	1351.49
200656_s_at	P4HB	721.87	1188.9	659.22	1214.53	1498.34	1281.68	1211.19	1499.4	648.52	1202	893.44	823.95	2586.53	914.46	813.96	1519.7	1156	1673.54	1851.84	1618.33	680.1	1387.29	1653.02	1127.63	1240.93	1617.93	1039.1	1466.08	2708.13	843	3335.03	1349.76	1149.43	1311.93	1051.48	2044.34	1243.05	763.65	339.74	1203.21	930.77	2120.46	1271.33	1239.48	1101.19	1160.68	1247.78	1892.77
200657_at	SLC25A5	2173.64	1423.25	1564.98	3004.67	2793.05	4065.68	1644.19	2901.44	2650.32	1636.18	1694	1794.09	2600.89	1502.35	1951.54	2452.23	2891.56	2379.67	1603.4	1695.36	2103.95	2105.54	2037.81	2197.42	1660.14	2168.57	2597.02	1564.92	1152.14	2444.91	2527.96	2454.57	2006.43	1127.75	1715.35	1982.3	2807.87	1626.15	1898.03	2958.26	3002.06	2099.83	2458.11	2976.1	2657.08	2878.41	1532.01	1781.54
200658_s_at	ZNF607	394.55	347.51	474.41	415.05	701.64	973.72	356.06	572.78	821.75	558.92	217.73	175.43	209.12	238.58	277.59	362.04	647.34	286.16	363.87	496.57	499.29	683.41	436.77	227.95	423.03	535.05	376.2	1346.97	185.59	551.09	411.89	301.21	216.21	222.65	249.21	319.45	289.86	433.78	191.67	631.63	297.48	177.39	704.59	1003.37	550.28	362.61	447.3	519.04
200660_at	S100A11	4475.19	4302.85	1965.77	4024.76	4670.62	5471.59	2749.44	3125.58	3691.52	2599.43	2652.81	2401.6	3046.93	2110.74	3835.55	6214.65	4301.93	3308.33	4285.8	3372.13	2260.62	885.89	2428.17	1969.32	3844.54	2751.84	3824.26	2962.3	3026.61	2038.42	3706.74	3473.8	4593.99	2756.79	3153.7	5543.49	4214.61	3743.49	446.25	3351.89	763.37	5640.39	2421.58	2770.25	2424.82	2810.25	2310.94	3370.97
200661_at	PPGB	850.05	710.89	586.86	396.88	781.64	825.06	818.68	550.72	696.64	484.47	870.86	583.27	654.74	743.54	1248.43	728.51	787.54	474.07	792.37	999.2	543.44	339.33	484.96	641.28	654.6	557.21	555.08	516.01	565.02	643.02	486.11	501.89	805.9	574.16	465.43	711.5	923.55	664.94	433.56	1032.33	946.69	705.6	701.99	488.71	444.66	385.93	946.64	867.3
200662_s_at	TOMM20	2997.86	1764.02	2190.85	1175.61	1810.14	2411.52	1057.38	1571.59	1566.41	1886.33	892.49	1966.15	1804.8	840.35	1901.1	1419.97	2502.36	2098.79	1847.98	1092.93	2005.33	2625.39	2096.35	1677.43	1651.71	2802.77	1847.42	1470.4	1501.34	1799.07	2013.59	1492.94	1714.31	1336.98	2132.46	1383.59	1336.01	1675.74	550.8	2477.24	1622.73	745.59	1727.25	1930.32	2542.83	2672.61	2401.15	1931.45
200663_at	CD63	3245.98	2081.92	1797.22	2620.26	2150.11	3056.19	2014.5	1863.96	2341.83	1844.55	2525.19	2119.76	2370.74	3264.19	2772.94	1942.7	2009.21	1978.3	1517.64	2439.18	1591.09	1454.16	2477.08	1856.01	2024.09	2209.76	2896.62	3715.92	1792.54	2433.04	2782.63	1462.98	1853.75	3388.82	3033.1	2471.54	2606.4	2794.91	1056.16	2208.53	1218.58	2308.89	2268.88	1578.52	2704.82	3796.52	4441.68	2614.87
200665_s_at	SPARC	2416.09	2978.89	2912.52	4372.27	1794.68	3334.75	2546.49	1321.22	3836.36	1367.13	4650.42	2394.93	5080.92	7031.57	2612.87	2185.65	3266.85	5342.76	3023.24	2825.61	4697.95	2721.51	4150.71	6374.11	3903.83	3538.77	5493.6	5221.11	3819.36	2999.67	4121.63	4592.75	4681.21	5292.23	6130.36	2878.28	5286.96	5247.64	1391.6	3902.65	1450.75	7292.08	4470.19	1950.15	3290.55	4335.07	6636.96	3799.89
200666_s_at	DNAJB1	439.39	921.4	663.65	643.63	851.29	424.6	483.77	746.37	434.34	773.9	335.6	648.11	519.63	333.76	458.22	568.38	1089.59	1084.96	800.98	459.96	772.66	653.03	597.97	935.58	517.71	569.02	950.61	666.92	325.16	386.42	1099.02	612.46	685.57	631.46	557.23	701.28	470.58	875.87	173.03	1313.96	778.22	981.51	463.19	693.02	812.75	531.47	406.55	1014.91
200667_at	UBE2D3	1035.13	532.24	545.66	629.28	762.87	455.28	603.1	322.56	885.78	617.34	989.17	688.7	603.82	601.85	961.02	664.66	518.64	644.88	669.34	536.19	594.22	713.28	528.3	502.39	781.16	422.21	906.38	894.93	428.8	821.4	638.39	663.01	523.39	557.79	684.11	711.19	480.37	702.06	659.77	724.06	247.78	436.97	894.63	564.72	397.67	747.47	585.32	800.04
200668_s_at	UBE2D3	1884.8	1281.82	841.97	1378.55	1456.3	1281.09	1084.24	833.32	1791.12	1675.99	2052.8	1658.67	1397	1289.41	1290.71	1387.34	1170.86	1040.55	1725.7	1642.71	1100.31	1277.79	1032.07	987.35	1445.93	958.97	2236.84	1556.22	1019.3	1922.57	1311.57	1178.42	1066.33	1034.46	1206.56	1562.4	1186.16	1092.5	1011.17	1167.34	828.21	1020.34	1669.73	1006.25	1001.54	1507.63	1426.25	1729.15
200669_s_at	UBE2D3	863.45	535.09	392.56	640.99	1103.45	624.34	475.99	321.18	828.98	755.28	953.68	761.41	785.31	528.35	901.95	694.86	666.13	424.07	761.97	1024.94	363.72	657.85	420.32	364.45	678.2	368.25	1029.63	719.28	410.24	987.92	661.75	611.8	520.37	456.1	694.79	813.54	740.46	568.31	352.88	604.36	492.76	517.29	887.49	558.94	370.47	588.74	789.27	1002.04
200670_at	XBP1	753.5	901.91	668.82	684.24	266.37	570.46	1166.4	1665.25	760.2	786.42	1135.71	1428.34	529.52	1602.26	838.57	1190.26	616.73	588.54	950.89	478.59	1133.24	458.91	555.58	918.01	738.57	686.06	1996.73	1757.83	1206.35	869.15	618.73	968.45	1042.05	2190.14	247.41	943.05	343.49	3596.53	1869.34	629.39	142.49	466.85	1789.51	213.54	2855.16	3256.41	4928.89	1536.67
200673_at	LAPTM4A	3070.71	2247.31	2449.17	2507.33	2211.94	2987.45	1538.69	1825.07	1521.52	1903.15	2858.49	3908.61	3626.01	2671.27	2570.83	1739.58	2232.6	1895.2	1805.67	2126.7	2705.45	1562.16	2303.81	2079.81	2033.84	2698.55	2208.97	3531.11	2704.18	1493.51	3381.95	2507.74	4499.92	2920.38	2211.55	2921.65	2988.61	2624.13	861.73	4004.12	1189.8	1777.09	3134.32	2799.9	2910.65	2237.2	2860.81	2790.99
200674_s_at	RPL32	7798.31	6508.56	10362.5	6724.56	7945.77	9427.18	5857.76	6952.64	6980.82	7094.07	5783.26	7642.5	6470.63	6479.78	8156.7	9845.34	7246.87	3125.95	4673.89	8060.31	10821	8915.37	5941.33	4541.08	5297.14	6340.81	4364.37	6644.35	4278.3	9424.86	6674.47	6043.52	7392.44	6949.34	5251.17	5410.8	6496.54	7977.71	7898.76	8057.02	7613.93	4383.61	5618.02	8570.32	9372.13	10964	6120.45	4664.07
200675_at	CD81	1434.18	1613.42	1791.53	1252.23	1253.01	1146.65	1717.52	1554.37	1388.84	1413	1996.39	1369.22	1654.38	1777.85	2438.98	1885.35	1573.62	1888.96	1745.73	1372.57	1436.83	1388.32	1807.53	1153.37	1775.08	2581.11	1238.8	1566.9	1192.48	1472.06	1988.96	1644.36	2615.24	2050.15	1651.21	1823.1	2112.95	1760.31	1115.26	1710.77	2678.41	1796	1421.23	1511.89	2151.53	1047.03	1638.37	1799.85
200677_at	PTTG1IP	2440.42	1643.82	1368.58	1402.69	1925.45	1579.44	1335.5	996.68	1049.3	2293.24	2888.61	1829.84	3240.47	2349.56	1773.92	1185.81	1336.67	1484.8	2199.19	1688.62	1333.55	1229.45	2548.48	2388.34	1155.65	2261.66	1987.04	3922.78	1949.63	1604.59	2105.85	2070.35	2387.13	2265.65	1313.28	1429.01	2905.94	2878.11	593.68	3069.86	964.73	4196.78	2298.15	1552.87	1430.19	1522.79	2706.19	2293.48
200678_x_at	GRN	1428.7	1113.62	599.2	1055.28	1292.88	951.68	1344.49	844.09	1350.16	570.26	1596.47	983.39	1027.82	1177.22	1962.36	1626.41	756.44	979.49	1090.28	1312.07	880.93	840.96	764.25	727.65	983.45	1150.35	844.27	827.89	822.43	1279.25	760.45	865.58	1236.27	893.54	882.44	1568.51	1583.41	1101.08	594.43	1005.45	1021.63	1166.11	1188.38	1457.31	880.16	617.01	892.52	1538.8
200679_x_at	HMGB1	1067.9	1094.78	1113.4	2386.58	1466.51	1619.09	1063.82	746.51	1673.65	1379.15	1003.41	1267.21	814.95	969.52	919.79	834.72	912.48	917.55	672.34	569.99	946.64	1116.71	1100.19	1718.99	710.22	1380.43	1634.05	1002.52	649.59	726.73	911.37	1365.78	668.63	961.66	1072.32	1650.85	940.36	860.67	580.7	932.12	943.35	525.92	1562.28	1112.7	900.96	1135.08	756.08	600.3
200680_x_at	HMGB1	2966.21	3697.88	3093.27	5834.82	3435.23	4048.39	3306.78	2898.56	4266.25	3889.97	3539.04	3589.05	2390.26	2833.16	2282.44	2599.95	2426.77	3660.25	2205.05	1918.05	3271	2753.91	3702.79	5019.33	2856.27	4191.43	4154.24	2919.43	2341.32	2622.48	2651.33	4125.03	2693.32	2996.82	3327.77	4447.96	2895.49	2912.5	3409.23	2585.72	3303.69	1808.61	3463.37	3156.37	2942.11	3137.13	1879.26	1819.07
200681_at	GLO1	1467.16	972.73	2357.87	789.4	1198.18	1238.11	1285.75	1266.99	1218.65	1318.51	740.01	1376.91	1143.48	560.62	757.02	890.55	1362.49	1374.55	881.48	845.35	2257.56	4011.49	2206.39	637.64	766.69	937.58	1138.27	1530.96	868.31	900.96	1961.42	699.28	1404.83	756.1	1183.12	1411.16	2381.37	1028.65	582.74	1760.98	1868	1827.2	1173.93	819.98	2198.96	1398.54	2643.89	1558.34
200682_s_at	UBE2L3	1175.63	656.42	965.32	1197.47	1129.09	1178.64	1031.78	821.28	1608.96	1048.72	1317.39	1078.42	1118.11	636.66	914.02	1070.31	1068.78	904.71	932.39	887.35	627.89	976.65	1095.2	899.57	701.94	1299.48	1299.72	1340.04	655.51	731.68	973	1183.81	1117.83	1043.31	606.99	1168.59	1024.31	847.71	841.83	1599.9	566.18	1119.81	804.56	991.13	1518.42	1337.65	1699.07	975.41
200683_s_at	UBE2L3	504.64	332.33	517.78	431.56	700.93	543.14	494.07	379.31	609.64	452.59	575.21	561.28	668.87	457.62	585.54	499.56	469.66	377.49	539.54	334.97	373.14	461.14	590.58	416.73	359.45	572.9	501.48	819.45	422.58	371.93	321.26	895.77	602.19	544.57	323.46	555.47	499.86	453.75	335.74	697.99	275.27	670.18	406.56	339.9	617.46	632.31	808.23	406.11
200686_s_at	SFRS11	1488.86	1483.64	3372.44	1280.04	1311.88	1136.09	2083.39	1685.46	1512.91	1298.74	1754.61	1934.5	1495.37	1716.38	747.47	1394.65	1175.65	1244.97	1050.64	890.78	2012.14	2235.17	2009.27	1027.9	1260.63	1575.22	1120.46	1422.98	2317.94	1293.77	1288.52	1983.96	1093.86	1291.49	1547.11	1186.56	997.21	814.68	1863.11	1351.83	1838.65	1358.85	1722.64	1621.62	1240.72	1342.22	1387.24	1331.03
200687_s_at	SF3B3	430.97	525.01	1243.54	494.77	1126.58	595.33	619.07	853.74	669.43	510.26	618.93	587.64	667.05	317.76	1160.19	804.85	758.11	455.28	1086.62	1010.21	566.77	451.51	595.24	657.97	655.83	645.97	442.42	450.49	727.73	992.75	725.11	490.98	904.38	401.66	460.41	436.51	696.24	254.48	458.32	493.24	819.21	668.39	347.01	397.92	844.34	250.14	406.42	731.09
200689_x_at	EEF1G	7275.07	5229.62	8944.52	5904.63	3980.98	5894.14	5374.44	6083.46	5649.92	5714.21	3971.6	7726.13	5652.24	5968.92	4795.52	4580.24	7237.64	2986.64	4691.53	6592.19	5697.16	5829.89	7892.83	7433.81	4508.64	8699.33	3455.32	5148.43	3582.17	5228.33	3772.92	6724.21	6462.25	5707.38	6012.34	4058.86	5144.03	4806.88	6022.46	4989.6	7212.89	3038.96	4758.48	6953.08	5359.61	7543.09	5555.37	6500.43
200691_s_at	HSPA9B	813.57	1030.16	1771.95	1107.23	832.99	1027.8	877.28	470.04	738.71	896.59	902.17	794.76	811.34	540.31	903.75	1245.83	1103.47	675.52	1092.2	998.91	1156.64	1274.19	707.95	571.33	813.62	666.12	1112.7	874.48	650.41	673.48	1383.08	820.19	774.17	791.09	923.48	769.48	823.95	1017.41	513.77	1094.87	714.71	794.21	991.99	1311.96	614.7	755.88	1255.89	618.37
200692_s_at	HSPA9B	431.64	527.69	1067.58	630.82	524.04	671.66	486.89	282.73	475.93	663.9	488.86	364.6	469.55	303.66	532.96	694.97	727.81	340.69	561.5	544.74	535.46	878.11	432.33	342.3	496.78	396.63	878.6	548.24	376.31	392.19	831.81	419.34	306.41	451.02	493.56	455.74	504.91	542.59	157.45	603.29	517.19	417.86	649.95	841.62	492.31	494.01	910.15	394.77
200693_at	YWHAQ	2684.16	1852.61	2426.09	1919.5	2585.83	2830.46	1278.47	2564.94	2205.81	2058.36	2104.66	1432.13	1970.23	1204.24	1734.08	2236.17	1870.25	1628.08	1868.67	2251.3	2051.93	2008.96	1720.11	3361.2	1847.53	2114.66	2498.89	1701.15	3131.99	1235.56	2174.3	3265.69	3107.75	1971.86	2131.17	1990.39	2243.2	1711.19	737.92	2465.22	2442.69	2772.78	1978.3	1863.81	1293.31	2304.51	1983.7	1793.75
200694_s_at	DDX24	452.47	564.82	435.71	558.04	418.66	587.35	635.61	837.08	734.71	523.69	553.22	428.09	396.2	479.93	658.02	641.6	510.06	562.36	546.92	543.46	530.84	647.25	432.02	428.98	641.43	386.2	550.52	354.64	482.17	440.69	627.21	444.09	484.22	596.41	355.96	356.87	551.2	365.24	568.13	474.81	871.58	412.09	501.66	462.67	356.94	461.5	446.21	632.01
200695_at	PPP2R1A	455.36	578.2	410.37	912.1	619	665.42	483.39	628.93	407.59	313.24	438.01	443.42	577.38	413.2	601.93	621.72	617.41	498.35	491.86	759.92	424.05	388.28	341.96	569.33	452.74	469.08	419.14	520.07	548.62	570.45	689.2	580.02	464.96	540.78	630.07	445.43	604.12	532.01	252.16	488.34	948.58	703.3	352.64	402.1	340.68	414.5	543.64	518.84
200696_s_at	GSN	776.59	699.93	682.39	792.58	479.3	377.62	535.75	500.56	596.78	363.45	1012.59	579.33	1171.44	883.33	1074.5	569.89	468.47	493.58	403.24	599.78	668.44	457.69	1062.11	632.4	700.14	473.01	522.14	866.6	1307.54	859.15	312.87	814.77	748.72	2148.13	912.61	1234.87	1391.64	1421.87	503.55	1060.63	3592.87	1280.83	557.74	483.25	229.93	518.59	730.1	625.39
200697_at	HK1	567.42	757.83	777.13	1014.58	718.9	1295.48	775.3	489.07	520.07	812.07	812.09	697.05	990.3	656.7	977.93	625.75	1213.92	597.16	1023.25	998.94	864.42	540.36	761.45	924.17	596.05	965.95	1004.79	734.94	500.11	863.28	525.35	1042.23	956.78	811.76	669.79	628.73	995.37	887.05	614.07	498.44	768.11	1427.79	494.3	526.74	974.45	749.16	795.94	1177.05
200698_at	KDELR2	958.96	358.68	551.84	1600.7	610.09	674.86	428.45	782.88	552.58	1187.24	487.01	734.06	1088.14	576.48	777.12	1032.05	847.48	1116.45	1141.12	702.25	596.1	514.08	784.61	1177.79	848.9	942.5	772.38	798.22	1104.47	454.89	721.44	960.99	1163.04	739.39	696.93	856.18	628.56	681.35	172.53	682.87	273.94	1765.33	1189.31	459.27	712.37	820.38	1540.86	910.3
200699_at	KDELR2	1232.08	451.74	519.04	1453.74	503.18	581.05	578.42	1066.83	708.99	892.01	520	936.09	723.34	625.72	1104.25	1042.7	543.17	1574.7	693.43	842.19	872.95	590.25	1066.75	1178.4	577.73	1095.42	753.64	792.93	961.05	386.33	575.49	1216.03	1443.72	834.34	929.86	776.19	657.46	913.1	273.27	794.13	140.96	1387.93	1088.71	235.62	562.47	983.99	1049.56	795.88
200700_s_at	KDELR2	1514.68	969.67	593.39	2889.08	1296.1	1221.9	709.37	1494.7	1303.37	1251.21	944.71	1107.05	1863.34	1137.8	1422.09	2325.09	2045.37	1029.34	2590.75	1651.97	759.66	512	840.17	1085.03	1068.98	1243.05	1693.42	1091.83	1139.95	966.85	1324.39	1333.35	1460.01	1073.3	811.04	1603.75	1326.28	1054.57	539.9	1065.35	725.42	2951.47	2120.95	1354.02	756.26	1038.99	2235.7	1558.47
200701_at	NPC2	1915.88	1178.53	709.21	1228.72	1198.13	853.92	1570.06	1745.71	1114.1	558.35	1715.14	1263.43	1530.11	1819.81	3420.95	1173.54	879.16	884.47	826.37	2604.45	1109.67	909.23	759.89	1053.3	1082.23	1008.02	1152.36	1260.97	893.24	1446.78	1533.57	1046.79	1434.52	1780.24	844.19	1285.77	1808.34	1219.36	1236.8	1951.92	810.11	795.12	1091.34	1315.65	642.74	983.64	1038.65	949.97
200703_at	DNCL1	1717.05	1450.11	1849.68	2270.34	1875.9	2310.28	1681.42	1586.28	1553.98	1370.25	1649.59	1398.51	1708.3	1132.9	1990.17	1606.94	1909.3	1186.39	956.59	1406.82	1593.04	1694.34	1343.06	1325.07	1171.86	1832.94	1672.81	1576.88	688.89	1235.15	2430.65	1036.25	1807.81	1104.72	1141.27	1206.31	1460.42	1440.5	680.94	1972.4	1683.6	1438.66	1520.21	1399.77	1904.29	1585.5	1213.31	1700.6
200704_at	LITAF	2889.62	1215.63	593.61	1089.55	1029.48	2072.87	1228.44	1896.09	1525.62	942.76	1879.32	1195.52	1782.83	1824.93	2050.39	1130.93	781.86	1573.84	3725.66	1741.91	827.69	568.24	1467.41	594.45	1383.1	952.49	1130.19	2031.94	710.25	1676.86	974.16	1426.06	1529.25	1147.13	2020.95	2284.98	1612.58	1438.15	1393.71	637.61	1928.28	713.47	1324.37	271.62	372.45	1127.89	2043.13	641.53
200705_s_at	EEF1B2	1386.13	1486.68	3101.86	1554.8	1275.31	1114.04	1557.35	1603.84	2783.33	1371.12	1490.13	2888.17	1007.74	2105.11	1357.01	1722.24	1546.13	918.28	1321.26	1673.42	1826.79	1444.74	1649.94	879.33	1221.91	2412.94	1348.75	1655.23	755.22	1548.74	1502.35	1178.75	1317.07	1114.93	1185.22	1076.9	969.37	1486.26	2984.4	2195.19	1329.66	650.25	1404.03	2617.11	1493.73	2580.69	970.07	956.8
200706_s_at	LITAF	1854.26	858.86	496.61	591.44	663.17	1404.95	1216.27	1919.32	1673.69	1059.01	1388.34	853.98	1015	1187.51	1253.83	729.04	574.33	1751.32	2781.59	1053.32	539.94	387.61	1437.65	683.33	1573.37	1099.72	1135.89	1299.84	477.12	1075.02	563.93	1047.2	1225.5	644.75	1087.31	1282.36	935.94	952.87	1354.8	423.17	1158.19	434.2	818.39	205.15	338.12	1078.01	1170.42	387.05
200707_at	PRKCSH	482.54	489.01	638.1	579.87	554.27	522.47	481.75	898.12	337.14	294.08	367.58	667.98	701.75	517.81	628.19	630.27	913.66	295.97	480.15	571.54	521.86	344.56	335.16	707.29	474.75	417.69	330	552.91	397.1	482.1	386.23	755.98	1449.19	635.53	763.77	621.58	547.99	665.96	305.01	388.8	1365.96	601.78	347.27	637.81	893.39	570.04	466.28	639.01
200708_at	GOT2	464.87	763.09	669.96	829.26	665.65	981.3	539.94	700.68	831.58	866.48	551.1	558.04	648.33	448.41	529.19	768.2	465.67	415.6	975.95	761.77	514.47	328.2	757.48	687.32	602.73	992.17	767.83	1091.31	951.87	649.68	592.78	306.98	981.48	530.48	421.95	398.9	759.05	351.45	417.77	653.8	565.61	1124.68	367.65	336.1	1093.34	454.93	1041.94	979.29
200709_at	FKBP1A	1674.72	2017.33	2910.2	2107.86	2174.8	2608.04	1364.53	1071.26	1287.57	885.38	2125.64	1541.16	1909.16	2410.41	2135.86	1791.55	2193.02	1265.16	1812.19	1367.17	1309.1	1252.88	1076.02	1168.13	1764.17	1507.39	1466.57	1716.85	1415.12	1949.41	1385.24	1629.15	2932.12	1875.28	1856.83	1593.92	2150.96	1520.23	857.71	1097.88	2113.06	1973.12	1752.02	1650.73	1020.9	1455.05	998.39	1513.61
200710_at	ACADVL	1240.45	932.94	778.27	1164.61	741.6	910.27	1047.69	899.48	963.14	510.57	699.43	866.2	614.84	1488.72	990.93	1106.88	801.62	601.97	614.08	1003.22	596.66	940.27	485.06	965.53	698.81	842.92	963.81	938.28	528.85	666.88	789.61	1078.8	943.64	1305.29	1013.75	866.33	1851.46	955.71	827.34	796.99	543.07	713.11	612.72	882.22	592.39	809.88	961.03	812.75
200711_s_at	SKP1A	444.29	256.52	347.18	324.39	307.79	453	243.28	256.08	251.55	244.34	313.42	180.05	203.67	302.52	294.45	198.2	193.7	371.09	213.29	218.52	287.49	438.22	240.57	234.49	278.05	280.95	372.43	471.15	296.36	211.22	430.34	148.67	314	392.17	349.82	319.83	255.31	428.64	129.92	404.16	167.73	208.54	347.09	362.78	389.94	571.75	457.95	269.57
200713_s_at	MAPRE1	908.51	1480.5	930.4	1680.9	1526.8	1641.34	1299.18	1401.77	1014.85	846.32	1250.05	807.08	986.28	763.49	1909.77	964.75	1376.32	3483.18	1400.84	1191.21	1097.93	1139.1	880.43	2369.55	1140.45	1107.23	856.27	1381.98	1811.3	1463.74	1223.91	1306.46	1259.55	943.57	1245.57	1328.38	1250.97	990.48	942.26	1583.08	1730.83	936.85	1616.43	3086.7	726.87	1030.09	1638.92	1518.65
200714_x_at	OS-9	836.47	777.54	706.85	756.22	810.98	1359.54	724.42	610.63	604.52	365	863.37	1183.63	1281.41	1266.32	929.84	739.8	707.93	742.82	801.58	886.31	603.7	646.93	720.79	772.28	832.13	678.31	780.89	922.57	1013.52	823.32	713.98	697.05	1121.85	1151.82	1194.02	764.15	1072.03	1134.53	707.55	722.46	994.71	986.02	740.16	661.15	830.99	864.28	2823.93	1113.35
200715_x_at	RPL13A	3472.29	2550.08	4021.7	3137.7	1460.2	2997.96	1699.68	1805.34	2539.38	1238.99	1872.22	2673.13	2089.71	3265.36	3347.61	2026.37	2917.63	1034.9	1448.36	3727.84	2096.19	2845.68	1688.59	1597.69	2219.56	4528.86	1883.44	1973.16	1633.3	2032.1	1628.25	1992.59	2268.4	2852.06	1795.11	1581.44	1862.58	1484.98	3758.24	2489.55	1691.28	1348.9	2157.51	1253.17	2410.38	4580	1433.89	1933.2
200716_x_at	RPL13A	7025.76	5289.35	7553.36	8759.56	5505.55	6773.76	4538.99	4638.66	6646.44	4128.13	4948.62	4835.64	4750.26	5676.77	6662.31	4460.58	5786.13	3139.21	2758.92	9137.05	5191.61	5894.62	4656.84	3506.77	5265.85	7796.15	4549.9	7101.59	3569.59	6004.34	4847.45	5158.91	4206.25	6079.07	5446.32	4275.77	5370.87	4833.02	6248.2	6879.86	4374.87	3252.55	5329.97	5927.81	5285.13	6949.93	4236.58	5303.3
200717_x_at	RPL7	5654.63	5503.88	8695.04	5886.89	6685.9	6257.89	3689.72	5281.05	7705.81	7242.26	5721.16	6931.79	5489.17	5135.13	4438.75	5698.47	7502.64	2581.42	3999.74	5148.98	11700.5	8695.32	8058.56	5105.48	3548.31	6938.61	5731.29	9596.81	2328.62	4616.88	7598.64	3780.16	6537.6	5951.83	5874.96	5483.83	5939.83	7431.25	6353.09	12057.5	4194.36	2067.95	6655.73	6635.62	6945.58	9030.69	12284.2	8455.93
200718_s_at	SKP1A	2308.54	2000.72	1955.83	2578.23	2107.11	2746.4	1598.69	2215.96	1706.07	1907.04	2332.6	1246.3	1583.65	1940.45	1919.33	1289.87	1929.08	1914.62	1262.27	2144.97	1858.22	2748.71	1727.65	1422.6	1475.59	1811.3	2165.18	2304.05	1712.04	1641.34	2795	1135.37	1827.28	2222.05	2324.29	2489.52	2003.6	2437.17	1170.27	2274.04	1671.16	1565.28	2272.64	2902.6	2701.69	2616.41	3066.28	1737.31
200720_s_at	ACTR1A	271.98	135.62	210.96	204.24	211.61	287.96	139.14	149.67	224.66	205.96	213.99	165.36	270.66	255.18	288.02	189.3	217.28	165.68	145.58	369.62	193.49	233.41	232.31	278.67	161.04	164.28	350.65	304.72	152.39	206.55	167.66	232.43	246.74	239.77	209.42	168.58	336.77	212.08	108.51	176.35	268.91	303.89	244.76	219.22	117.99	226.81	353.94	322.28
200721_s_at	ACTR1A	285.85	235.57	237.81	194.4	252.61	256.49	225.9	191.97	177.57	167.37	189.13	244.83	253.75	261.83	322.53	233.36	203.92	224.6	203.32	282.66	259.06	262.33	215.25	303.6	262.87	220.99	256.8	277.19	201.08	193.51	173.51	329.95	319.97	287.03	216.58	206.08	404.02	228.93	152.65	157.13	214.58	308.28	232.78	204.29	129.64	308.73	216.38	275.91
200723_s_at	M11S1	1828.31	1390.16	989.27	2110.98	1044.13	1483.73	993.81	1149.33	1090.22	1460.11	1495.56	1383.34	1847.31	1002.62	1279.63	1767.12	1786.9	1892.22	2011.82	1363.73	1538.59	2066.28	1506.3	1018.46	2639.01	1669.17	948.37	803.39	1473.86	1588.36	976.05	1995.73	1419.41	1838.29	1925.68	2097.23	1220.05	1536.71	408.95	852.73	3521.14	2011.54	1040.8	2383.84	1259.31	1419.31	1892.49	1959.25
200725_x_at	RPL10	5304.88	5122.81	9555.4	5912.04	4359.92	5055.37	4024.85	4639.52	5294.7	6377.22	4314.35	4644.79	4736.18	5180.76	5407.26	4978.74	6313.21	3553.29	2860.9	7401.21	4858.24	4468.47	4305.29	5129.92	4284.78	6402.27	5506.33	4708.62	2916.72	4937.38	4216.11	4266.96	6912.34	6068.85	4754.39	4975.48	5502.65	4797.84	5295.96	5467.42	4845.43	3418.66	4332.97	5714.74	7939.79	7205.31	6638.46	5963.39
200726_at	PPP1CC	1815.73	1270.63	1386.07	1342.41	1055.38	1407.02	1254.61	1217.7	1255.69	2102.42	1268.22	1799.62	1095.22	860.04	1044.84	1295.78	1416.7	1082.84	893.69	1252.24	1514.42	2059.12	1479.27	1077.64	996.36	1687.48	1224.43	1074.72	1106.43	1355.88	1923.77	812.8	796.86	1038.67	1031.45	871.9	840.23	862.37	1588.9	995.69	1337.89	740.02	1481.42	1304.56	1540.63	1599.1	1100.03	1684.76
200728_at	ACTR2	1562.65	1644.46	1085.96	1709.72	2150.04	1460.69	1558.45	2572.94	2107.82	1751.59	1796.31	1588.4	1538.03	1344.19	1546.75	1870.67	1034.15	3340.01	1095.55	1036.09	1646.24	1123.44	2124.38	2051.45	1654.99	1949.54	2739.68	1739.8	2067.32	1866.79	1199.33	1939.88	1388.28	1675.8	1568.62	1977.64	1856.24	1228.43	2900.42	1690.34	911.3	2547.6	3041.27	1470.67	1287.64	1808.64	1983.44	1363.5
200729_s_at	ACTR2	994.56	941.38	649.4	1148.14	982.9	1143.39	1014.01	1056.81	937.02	1031.88	1406.8	858.44	1201.4	940.14	778.56	1112.73	760.91	1949.35	718.17	500.94	966.98	754.63	1103.84	1011.68	1068.61	1021.83	1710.28	1108.7	1576.64	1396.48	958.62	957.47	917.4	888.19	948.22	1051.06	1062.72	583.43	1425.18	868.86	938.7	1870.51	1757.85	1122.76	737.51	920.23	1480.6	859.39
200732_s_at	PTP4A1	449.99	446.18	460	537.6	394.68	1146.78	314.07	1968.84	526.14	427.28	474.03	318.4	351.76	466.05	524.24	459.97	524.41	395.21	467.42	457.32	583.04	1013.81	810.4	697.23	324.51	435.89	570.18	632.6	472.19	427.4	1013.9	477.67	2151.07	610.19	404.43	664.69	532.91	1306.64	175.45	833.3	276.55	1024.13	661.92	593.75	602.74	648.34	1032.81	383.57
200734_s_at	ARF3	585.23	286.24	452.61	372.37	308.44	1042.68	259.02	366.39	290.4	256.97	431.71	356.1	337.36	299.33	560.18	516.45	405.55	357.55	537.36	433.3	180.43	258.8	189.61	267.08	224.8	124.72	209.66	257.05	205.2	416.22	333.46	290.78	433.1	379.93	583	377.49	614.98	318.13	147.55	429.6	401.11	393.09	590.06	436.31	440.45	277.76	462.83	525.33
200735_x_at	NACA	5479.69	4193.19	5975.49	3987.33	3365.03	5147.51	4468.55	3277.1	3898.99	3352.66	3710.22	5668.39	3723.45	4184.74	3678.22	4123.84	5528.85	2935.36	2740.76	5123.56	4467.59	5507.92	5554.21	4461.63	3187.9	4309.03	4040.88	4998.26	3376.04	3468.07	5189.81	3611.92	3988.02	5066.47	4938.73	3403.9	4264.58	4902.35	4782.7	4006.59	4551.32	1930.48	4112.39	4225.86	5405.25	6113.1	6120.63	5168.71
200736_s_at	GPX1	1278.77	877.93	968.3	1078.33	1366.19	1524.66	1036.78	775.13	1319.71	748.31	1273.31	1076.45	1206.6	1423.99	2060.83	945.51	982.91	668.74	1157.42	1764.61	927.88	722.05	795.4	654.12	877.25	875.07	1301.83	893.61	646.28	1039.97	259.83	1311.65	788.13	766.23	820.81	1177.1	1632.92	1406.11	477.88	979.83	589.16	373.48	635	728.6	1030.11	854.92	741.48	986.9
200737_at	PGK1	406.13	545.46	328.99	869.34	431.37	876.86	338.36	458.6	339.21	360.79	343.45	356.83	357.51	227.31	323.82	409	889.74	723.47	385.13	418.34	485.17	680.45	540.93	437.66	188.38	503.86	1211.21	499.64	328.59	533.24	1008.56	521.1	412.92	226.45	603.81	729.72	403.68	341.11	202.86	950.03	874.64	643.65	578.17	567.55	546.1	733.39	485.28	576.77
200738_s_at	PGK1	2484.28	3382.73	1988.65	4389.6	2488.48	4810.22	2333.81	2786.44	1678.92	2102.02	2080.13	2280.72	2211.08	1541.74	2077.89	2851.8	5019.53	3526.48	2706.06	2190.89	2843.65	3115.81	2572.97	2613.73	1215.26	2848.03	5390.48	2900.82	2201.3	2954.77	4809.07	3155.32	2845.85	1416.04	2869.85	3818.24	2784.07	1979.83	1227.87	4292.42	4734.92	4110.01	3156.5	2773.61	2753.13	3168.25	2471.08	2717.16
200739_s_at	SUMO3	433.85	265.56	197.22	239.15	916.31	303.32	171.28	178.89	257.78	425.48	368.37	300.2	494.69	254.25	299.89	331.91	233.43	244.94	269.1	271.81	185.33	681.04	219.27	346.6	200.5	253.77	292	432.53	182.14	300.14	291.6	186.33	250.27	309.82	252.39	161.44	364.87	321.77	132.73	673.96	350.4	401.39	279.58	336.12	311.06	284.91	304.45	525.64
200740_s_at	SUMO3	1472.61	977.54	982.51	562.58	1776.24	1077.25	735.31	540.18	785.74	1245.15	1234.25	1282.74	1420.2	834.04	1047.12	1085.77	730.58	1108.84	770.5	796.65	898.63	1892.92	793.97	1437.18	792.27	1092.43	925.73	1717.26	664.42	1141.63	1015.75	607.62	842.39	899.57	923.34	467.65	1064.81	990.35	478.35	2257.68	1307.25	1486.02	932.51	1327.77	1193.13	1338.43	968.93	1402.32
200741_s_at	RPS27	5546.26	5461.18	4622.42	6176.98	6833.52	4441.92	4679.68	4392.77	5541.88	4162.34	6164.88	7287.13	3527.18	4634.37	5701.42	7119.52	6713.75	3388.33	2655.42	6466.75	5615.67	3738.61	3302.66	3193.64	3404.61	6222.13	5047.37	4566.2	3770.45	4370.2	7313.55	5318.64	6341	4838.11	4728.69	6604.87	4893.11	5636.88	7088.93	5714.6	3672.26	2373.22	5776.1	6258.03	6646.71	7407.07	3170.28	6341.54
200742_s_at	CLN2	449.34	523.43	345.44	480.85	560.58	310.37	464.35	644.45	503.86	233.7	876.64	644.96	627.71	869.73	1300.1	745.16	581.52	366.88	790.64	648.98	229.62	365.49	316.99	363.23	731.03	580.26	389.59	397.42	444.46	539.08	370.68	594.01	1088.85	705.84	476.96	626.75	822.54	740.55	317.93	377.64	1422.49	1006.76	699.46	318.44	289.83	245.71	685.59	700.63
200743_s_at	CLN2	726.19	1253.33	512.56	791.39	644.86	669.25	1160.65	965.44	1172.21	541.24	1718.15	1056.17	993.71	1897.5	1532.72	1202.68	675.41	669.98	1028.76	846.07	849.32	657.36	736.82	827.91	1055.69	1121.38	797.1	726.99	851.83	1017.18	509.78	919.61	1142.66	1117.6	682.31	1043.94	1101.27	1015.84	1631.67	765.78	1809.28	1148.33	1067.06	420.94	510.92	575.07	872.17	947.51
200744_s_at	GNB1	553.59	863.59	517.64	863.44	1083.15	1167.45	688.33	887.27	738.24	1084.57	895.27	708.14	818.01	558.54	697.41	689.59	990.24	752.51	1100.92	921.56	633.06	1095.15	872.6	1463.17	1441.29	478.7	843.04	565.43	682.66	855.7	906.11	1050.93	601.82	729.03	863.16	602.47	819.83	437.77	531.49	649.47	1499.93	1705.68	881.58	617.51	869.02	457.53	745.99	960.18
200745_s_at	GNB1	1039.24	1216.82	1090.67	1301.09	1071.91	1319.47	1075.8	1939.92	1712.19	1983.52	1314.08	1453.95	1150.87	1135.13	1124.89	899.85	1077.39	2158.87	1299.94	865.84	1136.74	1917.04	2387.3	3727.72	3040.43	1270.99	1528	1029.55	1398.75	1167.07	1215.66	2216.27	1215.31	1598.42	1578.78	958.15	1152.51	1006.58	1813.51	1228.84	1426.99	2310.15	1167.36	964.94	1909.87	1202.49	1170.24	1417.87
200746_s_at	GNB1	1072.53	1402.52	1570.15	1464.45	1389.09	1673.48	1468.22	1187.62	1046.75	1157.3	1429.43	1578.35	1304.12	1326.29	1436.97	1180.08	1373.13	1456.08	1620.6	1103.76	1726.4	2110.64	1613.37	2828.45	1744.97	944.8	1186.72	1498.7	1613.1	1358.79	1473.91	2135.59	1459.94	1566.99	1527.06	1135.9	1264.51	988.09	1410.55	1514.19	1703.73	2250.02	1286.2	1031.97	1420.66	995.17	1337.98	1459.52
200747_s_at	NUMA1	238.39	424.66	335.55	305.22	345.59	322.82	384.47	566.59	216.43	241.65	349.82	465.39	510.63	560.45	478.91	441.86	454.71	273.48	270.09	605.88	277.47	294.73	487.23	410.77	350.21	326.72	384.16	451.23	664.39	412.26	259.59	469.47	430.77	835.18	498.19	449.45	527.93	965.33	401.57	193.07	838.01	898.8	574.75	472.05	877.92	491.64	421.7	746.72
200748_s_at	FTH1	11301.7	9383.54	3788.68	7663.99	9616.39	8436.33	9671.23	8752.52	8395.39	12740.1	10479.5	10525.3	8663.98	8792.9	9642.69	6403.67	8817.12	10287.9	11064.3	11715.1	9482.21	5344.46	7275.18	10195.1	8817.12	8761.86	6354.98	8596.83	6958.23	9902.06	6299.92	12499.5	5731.13	8111.9	7446.55	4850.19	8069.31	9175.78	3995.65	7392.42	7645.54	9600.3	9374.73	11311.9	10007.5	7891.05	9720.99	10697.5
200749_at	RAN	658.49	272.83	1080.07	272.53	315.13	316.77	470.97	463.63	637.47	358.31	416.31	313.4	538.92	354.83	493.93	485.37	382.14	437.13	352.85	207.08	952.34	631.46	782.2	538.45	378.07	446.12	511.7	872.38	358.24	911.35	605.78	282.39	194.78	358.02	462.21	220.88	253.38	410.49	338.89	726.27	432.7	227.76	548.39	295.63	682.71	877.55	763.39	249.54
200750_s_at	RAN	1917.74	1161.68	1641.86	1915.53	2476.26	2377.81	1314.33	2148.24	2035.71	2187.55	964.67	1260.22	1890.46	959.93	1840.73	1440.72	3091.93	962.42	1319.84	1831.98	2330.95	1966.49	1886.61	767.37	1176.62	1830.71	1246.76	1310.61	769.72	2543.75	1629.53	750.19	941.02	703.47	1133.93	1323.67	1333.5	833.78	1128.09	1373.75	2059.35	650.98	1090.9	1553.24	2250.98	1995.09	965.69	1510.48
200751_s_at	HNRPC	916.2	506.96	551.64	737.89	1007.97	884.49	430.46	394.55	784.14	725.02	577.67	513	629.26	568.1	609.04	633.1	569.89	431.25	576.64	536.12	504.57	878.32	610.83	352.57	595.6	518.64	680.05	513.47	341.64	707.13	655.87	342.77	391.69	542.07	431.76	584.75	446.72	481.29	144.77	782.6	691.99	385.73	999.61	972.3	734.43	736.92	754.95	928.23
200752_s_at	CAPN1	316.38	280.76	289.16	242.6	252.52	444.95	318.04	288.16	291.7	190.42	273.26	252.18	315.03	243.95	286.81	226.4	337.61	252.65	236.26	234.33	201.58	136.83	312.49	550.79	190.13	216.3	209.93	344.77	395.74	128.18	221.36	752.61	412.92	228.96	254.15	329.84	372.92	252.8	215	197.08	264.83	289.72	144.27	388.16	124.83	197.35	191.87	259.62
200753_x_at	SFRS2	457.08	579.5	520.33	551.04	710.69	561.86	533.83	576.95	618.34	632.93	547.9	517.52	730.26	409.55	483.53	607.46	525.13	440.72	642.51	492.47	553.36	713.07	543.55	372.99	467.37	437.27	590.58	559.54	789.15	677.09	634.85	531.02	291.55	408.21	551.15	749.9	423.94	305.55	284.1	473.88	955.68	521.85	608.6	546.1	510.53	366.09	728.77	537.34
200754_x_at	SFRS2	1534.8	1576.67	1184.05	1658.87	2375.24	1221.54	1434.71	1420.78	1634.46	1537.18	1514.49	1489.41	1809.8	1284.8	1535.54	2005.43	1426.41	1512.59	1584.86	1630.4	1810.65	2338.23	1662.06	1053.81	1303.67	1235.91	1488.72	1362.69	2147.53	1919.59	2076.35	1520.52	888.17	1279.57	1917.82	2273.9	1511.52	1146.75	1137.18	1213.43	2408.1	1503.27	1618.18	1465.42	1131.03	1103.02	1513.94	1424.67
200755_s_at	CALU	1244.8	491.24	709.7	623.09	766.52	851.75	445.04	887.5	896.35	1522	805.38	609.63	1119.2	826.9	726.17	874.26	1041.64	1924.78	782.88	904.55	668.79	390.23	1369.76	2105.53	948.72	1286.39	1260.17	666.83	1012.84	1499.58	644.42	1021.23	1138.48	686.84	997.87	704.19	999.74	857.54	224.7	1217.13	454.29	1904.03	607.46	886.47	1334.89	1128.21	991.55	933.95
200757_s_at	CALU	1149.38	455.69	580.55	565.67	585.23	628.61	369.69	498.22	540.09	897.48	697.67	538.09	1171.58	754.36	577.51	743.93	807.65	1329.91	683.42	744.51	757.66	368.03	819.45	1448.38	531.82	702.46	700.81	652.02	999.39	1248.88	627.46	974.05	1072.51	581.26	950.99	618.57	935.51	712.35	202.7	1169.32	342.71	1659.46	510.26	679.02	667.51	662.56	926.61	815.14
200758_s_at	NFE2L1	778.02	549.84	448.04	446.04	672.29	680.01	629.9	561.08	673.61	516.71	490.98	588.43	680.79	640.89	715.29	695.62	716.72	568.84	660.19	1053.93	394.13	587.94	629.59	601.49	759.1	500.51	524.87	484.1	742.25	809.66	536.57	719.71	517.19	775.63	792.56	601.25	658.6	589.36	440.56	754.47	661.46	716.26	486.69	405.31	573.16	466.96	569.69	832.23
200759_x_at	NFE2L1	770.29	603.81	523.07	466.91	659.45	767.19	733.33	614.03	668.68	520.98	576.26	617.81	667.85	729.01	759.39	679.09	735.77	739.74	654.62	807.05	530.49	665.68	723.98	639.34	735.74	596.07	603.11	588.56	820.76	869.39	567.7	730.64	543.26	769.43	865.33	585.91	664.33	628.77	569.6	842.86	695.35	377.91	596.57	469.04	605.4	506.42	633.23	873.91
200761_s_at	JWA	1757.77	963.86	830.47	1090.19	676.23	1278.6	1219.8	547.36	932.14	814.24	1848.03	1421.33	953.44	1201.39	1570.31	1309.88	884.93	1762.05	1262.63	1364.31	790.49	604.45	965.62	508.47	950.25	937.77	1098.74	1755.5	727.1	938.25	2556.67	1825.35	867.8	1141.37	602.39	1121.58	1007.44	1405.11	1116.02	973.49	135.73	510.91	1279.94	1425.96	911.25	723.97	1020.61	1298.41
200762_at	DPYSL2	809.61	1303.73	637.91	675.25	570.7	352.3	649.96	1083.08	932.22	363.23	1294.92	761.74	2470.98	1494.73	1572.31	649.26	618.84	733.68	1070.83	417.13	988.49	1190.59	1339.63	841.86	939.35	1114.76	772.27	701	1344.36	1422.7	444.96	816.55	1381.55	1803.67	1246.81	1062.97	1313.96	1283.83	694.54	622.26	956.64	952.82	923.32	671.89	749.94	428.41	868.26	594.73
200763_s_at	RPLP1	10016.4	8338.61	7817.78	8707.77	7045.07	9087.34	8070.22	10843.8	8146.55	8107.63	7672.52	5645.05	10720.9	8880.47	9056.41	8710.1	7775.46	6101.22	6055.36	8217.11	9903.12	7744.92	7175.33	9362.1	9157.25	7901.18	9481.64	6638.32	6467.82	9726.37	5610.28	8356.67	7073.87	8291.8	8796.77	7858.23	8512.48	10153	11105.2	7871.44	9591.43	5681.16	8993.69	7980.41	8235.51	7599.12	7731.31	6432.72
200764_s_at	CTNNA1	311.13	428.79	384.03	302.44	397.61	475.18	341.84	755.69	335.01	336.79	364.22	304.21	442.44	341.81	478.42	311.27	465.6	431.4	460.71	367.38	327.41	472.97	452.16	365.42	383.38	437.27	617.55	379.23	539.37	325.55	557.65	484.06	372.74	461.67	501.38	492	497.02	542.06	120.54	385.18	349.4	448.26	361.2	489.04	296.24	586.95	648.69	461.35
200765_x_at	CTNNA1	568.43	791.03	588.54	511.48	730.22	782.53	533.29	1391.4	567.97	559.78	717.59	551.63	801.51	639.93	961.5	579.29	723.98	973.38	766.05	613.33	640.45	875.88	865.12	715.01	722.6	838.94	1116.47	678.74	1028.79	669.25	1118.57	871.2	655.98	913.14	1178.53	941.46	937.7	1084.51	257.21	698.26	572.88	848.54	660.5	851.78	490.86	1070.46	1106.42	790.09
200766_at	CTSD	579.79	635.53	441.49	444.96	779.24	265.97	728.72	646.12	455.26	325.65	616.97	637.09	1102.66	608.47	1152.68	860.52	602.07	472.37	525.28	650.54	597.25	311.52	779.51	446.44	297.6	547.57	424.77	626.71	404.35	671.99	300.43	662.86	769.15	400.38	430.49	781.74	647.67	680.18	216.2	617.6	451.01	722.28	431.61	499.69	555.89	797.55	672.22	932.35
200768_s_at	MAT2A	847.55	1090.42	1345.09	824.67	1151.6	638.77	1089.81	803.07	861.74	751.17	900.69	1030.1	847.77	728.68	892.52	1202.42	1033.23	883.01	825.46	795.05	1248.6	954.52	977.98	821.92	670.83	588.81	1037.26	973.2	783.99	949.92	831.96	822.15	841.69	1041.74	1208.61	901.34	898.1	1480.09	663.55	719.21	1878.61	756.6	1492.67	1248.58	876.21	769.7	1011.34	964
200770_s_at	LAMC1	350.53	348.43	251.74	388.95	1204.6	546.34	371.12	255.07	359.72	879.86	501.9	315.56	431.16	491.56	318.99	349.87	668.84	300.07	824.68	978.21	256.87	377.1	336.07	486.49	297.54	245.8	476.08	347.16	536	582.99	561.84	311.13	973.53	527.14	875.49	190.81	480.37	243.24	204.48	430.72	291.16	469.99	236.39	525.13	110.85	176.22	557.67	213.81
200771_at	LAMC1	586.42	579.99	443.05	613.71	671.18	554.09	740.39	223.96	503.78	682.89	666.42	595.08	614.55	1071.6	584.62	415.99	620.2	457.56	851.48	682.5	584.21	572.71	652.54	865.21	345.48	402.46	571.64	675.55	1198.72	611.42	730.91	723.25	1077	1185.61	1761.7	274.28	812.81	591.07	261.63	599.87	327.72	865.16	471.03	377.01	188.85	411.06	722.59	381.59
200772_x_at	PTMA	2776.26	2797.74	2643.54	3150.74	2402.89	2813.44	3138.05	1365.01	3856.86	3708.84	2199.81	1987.39	2994.85	2413.26	1319.56	2424.34	3091.61	3403.84	2214.3	2208.91	2701.78	4217.13	3075.55	2546.02	3121.36	3201.91	2238.25	2217.89	2109.22	3055.86	1929.3	1781.42	1273.2	2106.82	2782.8	3012.93	1908.18	2036.27	1199.1	1977.61	4007.42	3300.88	2090.66	3610.3	2361.08	2344.24	1976	2493.98
200773_x_at	PTMA	3820.75	3920.84	3632.84	4245.24	3267.08	3595.98	4067.98	2854.08	3804.5	3863.97	3380.76	3424.05	4006.17	3348.16	2861.86	3536.01	3953.14	4291.51	4006.46	3571.53	3850.94	5164.55	3836.93	3460.16	3718.5	3526.33	3030.92	3652.83	3887.35	4436.18	3569.84	3309.26	2587.69	2999.37	4280.22	4018.09	2893.11	3196.89	2947.73	3239.5	4944.85	4365.17	3617.73	4067.66	2927.72	3165.97	3092.7	3716.06
200774_at	C9orf10	1572.01	1414.28	1739.72	1330.69	1337.52	1349.98	1406.68	1334.45	1246.39	1200.36	1629.09	1835.87	1842.2	1401.1	1415.46	1619.37	1138.19	1499.99	2588.52	1644.66	1556.35	1251.67	1242.71	1233.37	1582.92	843.46	1271.86	1646.17	2055.74	1773.84	1521.83	1413.52	1562.46	1599.23	1220.29	1325.41	1151.71	1598.67	1534.34	1450	1264.29	2903.45	1290.83	1163.51	1032.43	1309.07	2133.57	2221.77
200775_s_at	HNRPK	3930.07	4324.25	3242.11	3681.2	3748.64	3501.13	3874.6	3340.08	2979.27	2676.86	3814.63	3752.52	3802.47	2956.4	3039.68	3599.06	3181.88	3386.97	4446.65	3475.36	4188.33	4290.58	3644.22	2994.32	3916.69	2756.22	3093.12	3185.03	4096.97	4038.2	4358.49	3618.99	2880.4	3365.7	4267.39	3095.66	2879.41	3565.66	2433.61	3313.68	4289.56	4025.63	3855.74	3635.61	2661.24	3281.7	3883.23	4204.41
200776_s_at	BZW1	544.83	356.2	368.62	749.79	844.07	738.89	407.04	662.34	524.8	737.52	1086.51	754.49	538.32	422.49	512.6	511.56	468.3	520.18	658.75	619.76	723.12	473.43	568.81	871.84	444.95	489.54	832.7	1028.34	470.14	1002.28	628.36	497.99	542.46	628.61	612.02	471.15	452.23	610.72	159.73	711.26	571.95	875.84	782.8	936.38	986.38	619.48	1353.37	887.74
200777_s_at	BZW1	712.42	480.62	537.9	729.36	819.23	775.39	674.21	874.79	824.16	866.92	1190.28	931.07	527.41	523.65	552.13	726.45	553.27	977.45	921.64	650.58	1224.18	595.98	835.86	1110.86	730.29	756.53	744.36	1103.63	612.12	1054.69	769	550.55	613.62	724.16	636.87	540.72	464.84	735.11	443.47	834.39	584.47	927.71	830.78	1021.91	1189.82	920.38	1409.28	967.06
200778_s_at	NEDD5	819.87	472.04	504.1	1301.51	605.53	764.03	581.57	878.84	612.78	484.82	942.59	632.39	1259.98	939.57	756.37	890.35	908.86	823.6	882.7	905.07	351.01	645.35	665.37	763.32	754.59	707.33	757.29	850.36	792.76	1298.99	1141.87	523.05	840.11	1061.29	1061.22	1179.27	740.29	771.86	193.2	779.45	1082.25	1478.38	1078.35	785.89	812.52	693.15	1535.04	1489.23
200779_at	ATF4	1619.98	1673.49	2937.38	1219.34	1352.06	1069.48	1763.56	1113.44	1892.58	1323.08	1290.66	2110.68	1888.22	1470.29	1603.44	2135.83	1977.13	1601.93	1776.74	1348.29	1593.36	1257.45	1504.75	1349.34	1701.92	1449.62	2183.54	1657.08	1058.01	1837.84	1371.91	1424	1661.51	1541.15	983.03	1720.06	1320.93	1821.58	1498.54	1755.77	1391.19	1699.57	1325.98	1316.11	1749.6	2196.31	1105.15	1556.39
200780_x_at	GNAS	8232.67	8572.1	7247.98	7836.44	8168.18	5310.11	5769.06	8889.67	3283.88	6265.2	5384.53	6870.56	6404.24	5019.78	6783.55	5602.85	7742.23	6059.72	9765.53	6476.79	4695.56	4830.04	7417.98	6024.42	8357.15	6924.45	6933.86	6286.95	6662.18	5842.65	12274.4	9226.36	9325.52	7303.75	7550.46	6496.58	6118.76	6029.45	4228.02	6970.64	9584.64	5498.82	5295.52	5291.88	6341.38	5086.16	11224.7	8769.71
200781_s_at	RPS15A	3618.95	1743.36	4132.87	2696.6	3528.99	3234.2	1959.89	2059.58	5284.63	2519.34	3438.45	3617.81	1554.69	1871.73	2818.34	1818.72	2462.69	1267.07	818.45	3726.1	2692.03	2021.2	2694.36	1649.65	1607.33	4489.23	1338.65	3436.87	888.58	1661.04	4325.72	1742.25	3142.92	2394.74	3005.14	2915.27	1758.24	2114.57	4735.06	3811.81	3133.18	331.7	3010.19	2669.94	3739.92	7266.81	1995.65	3883.85
200782_at	ANXA5	1688.48	1167.15	1104.82	1118.12	1486.12	804.05	1006.89	1180.02	1206.37	1294.38	2140.88	1516.68	1891.11	1298.05	1214.32	1306.29	1183.24	1400.27	1433.51	1226.1	1321.76	1102.99	1437.7	990.97	1267.14	1195.31	1827.13	1172.85	904.89	1400.94	1390.14	1587.25	1352.74	1255.84	1298.94	1689.26	1617.6	1619	599.92	1794.37	525.36	2005.31	1128.74	1100.17	1329.47	1806.62	1746.22	1109.26
200786_at	PSMB7	635.2	431.88	1083.08	664.28	881.28	971.7	562.16	858.48	1248.95	785.88	874.05	432.86	722.05	356.19	735.18	775.14	581.79	755.57	619.28	627.4	668.11	864.12	932.36	728.65	1152.75	564.74	730.01	1133.42	328.68	776.48	1229.17	300.89	651.58	400.66	729.26	642.26	498.58	775.37	291.86	700.39	436.99	558.28	755.75	1297.14	1137.23	853.3	653.78	620.98
200788_s_at	PEA15	1514.58	1504.41	1001.45	811.62	944.93	728.56	1025.37	1019.69	949.64	1061.38	1683.19	1202.37	1029.42	1556.98	2067.88	1139.1	1610.14	1488.81	1809.98	1206.86	943.56	763.78	1236.26	1228.43	1528.59	1492.81	1247.52	1152.52	1853.55	1280.13	1817.5	1513.17	2067.59	1427.16	1126.8	2278.63	1769.06	1430.21	680.74	1177.83	628.39	1824.2	1036.24	1479.47	972.42	1134.21	1314.87	985.33
200789_at	ECH1	291.19	376.92	322.58	463.07	402.46	983.28	384.69	466.51	485.98	349.21	361.75	279.72	394.92	386.14	1276.24	392.32	394.17	507.4	456.09	467.57	310.2	364.57	236.2	385.41	453.9	475.72	491.3	676.13	722.39	370.5	377.96	663.56	384.78	511.11	345.42	247.95	453.63	485.34	494.7	396.06	420.16	474.66	401.53	674.54	383.76	303.94	498.69	700.51
200790_at	ODC1	1235.85	585.53	3171.6	867.29	828.26	676.64	1034.19	693.38	1123.73	1140.43	725.44	639.56	631.11	494.64	430.14	1613.83	925.15	471.39	658.1	890.14	1413.34	1266.38	778	1668.34	421.67	490.43	1249.96	801.07	2756.37	446.33	866.83	1829.77	1027.05	368	2750.83	458.91	631.51	384.46	1854.73	1157.25	1082.8	438.64	2323.56	729.58	500.36	334.33	269.43	752.43
200791_s_at	IQGAP1	1704.26	842.7	860.29	1198.4	1116.49	922.63	1248.94	1989.34	1337.49	1090.15	1593.89	1028.66	1398.62	1236.68	1635.66	1074.7	668.17	1149.63	1232.28	1358.95	1693.24	1057.97	1095.87	1082.33	1206.23	565.19	1669.57	1131.26	906.94	1671.71	942.37	3046.68	1162.19	1413.14	1328.64	1919.48	1580.42	1490.22	1030.13	1452.52	705.02	1260.14	1727.59	777.49	960.45	954.61	1064.14	770.17
200792_at	G22P1	2372.37	1886.59	2630.39	1835.28	2455.57	2300.28	1909.11	1761.66	2683.37	2786.67	2105.51	2041.31	2325.33	1349.7	1795.84	2607.88	1946.84	3211.93	2461.23	1944.18	2468.45	2880.55	1917.12	1914.42	1521.27	2211.13	1650.74	1886.78	1329.94	2190.86	1336.83	1636.58	1837.01	1617.68	1416.38	1952.28	1887.72	1730.88	1362.14	3210.17	1645.02	2125.88	1681.67	1873.4	2383.55	1226.45	1517.65	1843.94
200793_s_at	ACO2	568.97	498.47	1030.96	505.96	650.71	535.08	490.39	391.08	875.4	834.16	635.57	587.4	661.63	448.22	693.65	702.2	612.67	778.21	954.58	357.9	721.75	515.13	488.01	1044.61	708.63	572.43	447.47	743.72	510.78	659.86	492.81	588.09	729.55	624.66	407.78	477.46	592.74	732.58	488.16	1037.45	392.46	478.8	521.14	527.22	819.97	300.66	542.42	637.83
200794_x_at	DAZAP2	2132.95	1568.64	1601.53	1648.8	1327.57	2096.28	1626.91	1277.76	1393.1	1086.58	2175.39	1725.24	1569.5	2113.1	2807.75	1767.22	1729.95	1489.65	1420.97	1412.12	1628.73	1749.93	1960.02	1230.71	1611.88	1305.67	1780.94	2429.64	2212.11	1648.55	1941.01	1640.73	1341.18	2104.06	1792.06	1996.89	1816.89	1781.64	1415.47	1477.64	1291.49	1287.61	2437.7	1272.22	1260.63	1754.82	3146.99	2199.6
200795_at	SPARCL1	707.34	857.17	675.06	775.09	265.06	683.91	545.47	164.8	471.11	241.42	940.68	302.64	786.59	1704.31	403.58	536.4	486.65	251.3	483.69	399.87	622.63	625.77	980	282.56	763.96	530.23	903.42	1513.36	624.92	608.18	770.91	570.02	1020.86	3331.18	1296.3	425.15	954.03	1361.81	281.67	533.22	250.21	561.39	1418.07	523.12	526.71	462.54	1120.76	471.49
200797_s_at	MCL1	2224.9	3654.52	1311.08	1877.39	2237.95	1922.51	3427	1504.25	1485.44	1547.31	2568.4	2775.59	1558.11	2002.38	1808.46	3466.65	1807.36	2307.36	2274.97	1996.65	1909.04	1586.85	2106.49	1297.48	2574.69	1400.53	1738.26	1164.6	1388.84	1456.02	1828.02	2004.28	1620.85	2507.38	1590.67	2089.04	2328.85	1773.32	2578.86	1900.34	1674.45	2800.68	1525.87	2687.48	806.45	1314.56	1267.15	2324.21
200798_x_at	MCL1	1469.4	1594.5	689.66	1495.97	1643.83	1553.6	1652.8	552.68	725.42	1202.16	2046.56	1655.57	1272.1	1029.56	1312.1	2511.04	2071.63	1396.21	2658.82	1213.81	683.58	905.45	775.85	537.37	1595.38	505.05	956.86	693.86	911.55	1215.01	1213.5	908.38	859.09	1482.32	783.16	1695.29	1524.13	923.23	607.41	1462.19	1184.71	2279.57	1418.54	2112.64	486.53	542.79	1137.27	1481.93
200799_at	HSPA1A	2366.88	1801.95	4107.8	2355.08	2921.65	2360.15	4872.34	3128.56	1812.1	2031.91	2822.44	3232.42	3754.24	1558.36	2516.92	2653.28	3267.19	4030.23	3255.56	1742.57	4262.1	4697.68	1322.64	2337.64	3305.92	2641.18	3380.19	1877.15	4429.12	1909.09	4018.64	3730.43	2367.64	2012.84	1614.21	2121.31	2252.37	3152.54	342.92	4540.4	3227.63	3769.55	2391.17	2085.16	3571.28	1393.17	3266.27	3785.26
200800_s_at	HSPA1A	1588.04	2054.58	2925.64	1257.09	2778.2	1655.48	4280.16	1918.3	967.98	1198.75	1589.92	1922.63	2941.22	823.71	1799.46	2186.7	2526.36	2427.74	1734.23	1444.47	3638.96	5023.49	881.11	1389.8	2239.49	1493.08	2064.99	878.02	2519.33	1311.34	2808.7	2883.74	1471.15	1186.79	1347.4	1690.5	1664.22	2192.23	181.01	3944.86	2086.51	2426.33	1555.7	1829.84	2420.79	934.93	2344.93	3470.44
200801_x_at	ACTB	12633.5	11797.3	8846.45	12160.4	13088.7	10424.7	11505.8	11246.2	11717.9	10821.4	12661.9	11550.1	11794.8	11676	11779.9	12563.5	9943.84	12149.2	12842.9	11104.8	11397.8	9107.7	12514	12818.2	11995.1	10789.6	11664.5	11251.9	10848.3	12582	9526.17	12354.5	11391.3	12475.2	13532.6	12051.2	13760.9	13018	12650.2	12342.8	12065.6	15540.2	10445.3	11231.3	8437.73	8817.55	11803.2	11997.5
200802_at	SARS	525.18	430.9	975.06	711.08	653.45	549.61	472.11	490.49	660.7	602.23	489.21	648.26	532.77	489.12	513.98	395.36	767.94	386.25	434.7	516.09	690.48	444.47	691.18	541.06	310.17	587.26	481.74	523.31	283.24	620.52	621.33	610.05	398.44	534.22	583.25	439.32	649.35	418.33	295.92	630.24	426.88	389.35	502.04	920.75	481.61	554.33	507.19	444.97
200803_s_at	TEGT	1038.85	782.94	785.27	922.02	1181.96	1733.08	750.01	889.12	940.09	780.7	1017.52	706.97	1066.7	937.42	1778.07	1015.9	1205.72	636.39	1041.11	1002.13	606.98	819.94	614.95	503.28	747.96	429.15	1064.18	1407.35	661.25	1324.07	1546.65	701.82	970.31	1102.56	926.91	1114.49	1467.98	1151.08	417.76	1119.95	898.17	1165.15	1759.67	1115.8	1455.96	925.32	1990.76	1571.98
200804_at	TEGT	1540.96	1024.49	1180.74	922.78	974.92	1712.05	1123.41	1014.3	781.98	720.77	1024.9	1108.17	1026.36	1128.82	2263.38	1046.45	948.92	984.2	942.11	822.99	939.03	1122.58	1036.76	612.4	897.56	737.93	985.07	2353.63	1109.39	1233.86	1348.21	1336.98	1350.3	1575.27	961.09	1027	1831.12	1740.3	741.73	1151.33	907.87	958.66	1548.7	715.5	1649.34	1468.11	1825.57	1897.91
200805_at	LMAN2	249.18	330.05	314.88	258.8	325.02	373	275.31	378.82	342.55	268.11	293.02	335.78	276.81	250	351.31	294.97	190.64	278.91	251.21	369.87	309.52	294.73	247.56	215.03	290.87	201.75	387.56	355.61	251.76	244.57	317.28	282.69	422.41	359.81	283.15	450.53	434.01	319.84	219.14	255.21	209.25	206.13	364.09	220.06	318.73	458.59	477.01	314.63
200806_s_at	HSPD1	1173.49	1276.4	2189.56	1758.77	2933.49	1412.52	1807.04	1302.18	1873.57	2915.67	1017.01	1412.46	1856.55	665.68	1498.74	1917.09	2370.75	1798.69	2438.19	2140.63	2814.25	1741.97	1406.72	1720.47	1895.49	1567.48	1426.2	1110.35	998.07	1680.45	1764.88	944.76	761.29	1057.97	1457.57	872.84	1012.19	874.51	250.57	1951.75	2182.42	2041.32	1629.03	2959.98	2117.51	1491.47	2592.13	2258.09
200807_s_at	HSPD1	2709.07	4113.08	5041.05	3999.52	4720.84	3627.18	4317.7	3318.3	3918.33	5948.04	2800.37	3560.92	3485.22	1643.74	2597.77	4001.58	4237.27	4422.88	5579.68	4747.92	6502.46	3867.55	3278.03	4232.69	4649.95	4567.45	3061.67	3251.63	2772.58	3857.23	4531.87	2539.66	2390.43	2438.07	2796.55	1833.38	2163.02	2255.29	1733.98	4404.83	4905.17	4436.76	3599.06	5734.46	5106.52	3688.61	4749.82	4135.25
200808_s_at	ZYX	496.77	463.67	445.08	289.05	550.57	363.95	352.63	385.57	249.78	352.15	438.58	500.26	734.56	621.8	684.68	648.98	472.28	275.13	575.83	500.82	297.84	153.21	260.62	532.52	525.02	334.53	369.4	496.19	259.34	525.83	218.71	886.13	529.12	653.89	405.57	315.64	893.43	454.46	275.21	503.98	309.19	1358.84	183.7	297.83	223.19	251.82	293.75	218.01
200809_x_at	RPL12	5585.16	5599.01	13092	4197.69	3877.34	6401.91	4232.46	6018.69	9417.74	6289.02	4188.55	6224.14	5112.91	5308.66	5439.06	4968.22	5097.89	4360.68	3274.91	6806.46	8240.91	6123.12	6178.96	6305.07	5601.22	6482.49	4231.41	4738.5	3343.52	6067.56	5967.68	3245.29	5739.01	5860.45	5446.88	3723.43	6108.17	5118.36	6692.83	7446.08	3744.95	2884.82	6857.74	8253.9	6212.67	9449.83	4792.26	8423.18
200810_s_at	CIRBP	770.73	1030.93	606.03	649.12	563.89	411.78	863.39	755.24	1066.33	612.64	782.2	801.8	702.14	1521.67	522.3	828.54	367.96	527.92	675.2	309.86	694.09	502.84	569.52	480.65	589.47	1007.34	940.13	1164.56	880.12	709.31	1036.11	1000.07	929.35	1745.11	1005.44	763.03	1144.09	1017.79	1743.03	604.62	1618.74	484.34	875.74	252.26	742.12	1272.51	1233.77	623.29
200811_at	CIRBP	387.31	493.21	296.97	345.28	296.6	236.87	380.01	296.04	446.89	247.36	379.01	411.45	362.22	761.97	349.97	367.7	193.12	204.42	391.45	186.94	281.32	235.59	236.15	198.74	291.91	437.65	428.63	636.25	442.47	343.31	512.2	462.49	467.12	862.7	464.27	394.99	612.45	539.52	597.2	308.7	741.95	270.25	434.2	110.15	303.81	522.34	609.72	343.9
200812_at	CCT7	910.04	837.62	1546.24	775.87	1456.58	1380.89	945.02	1069.55	1185.61	1390.64	699.86	624.39	692.56	506.42	796.24	975.5	897.65	762.08	906.24	694.75	1713.73	826.24	856.63	988.43	555.62	752.07	1264.01	723.73	618.12	830.98	929.57	434.89	731.04	630.36	731.11	579.42	921.73	676.88	524.28	1235.1	905.16	750.62	1154.24	1086.95	1284.16	924.82	907.95	689.2
200813_s_at	PAFAH1B1	306.44	206.5	180.68	266.07	168.64	156.29	223.81	146.09	203.47	227.83	282.61	209.95	290.67	294.11	266.83	226.73	174.38	279.35	232.23	200.89	218.14	455.02	692.96	255.75	245.13	234.72	277.05	276.86	281.32	300.51	213.8	332.84	267.76	413.73	417.96	243.68	408.05	247.13	139.88	281.67	167.17	296.77	267.84	245.74	241.71	172.13	322.96	225.94
200814_at	PSME1	2136.71	1928.24	532.11	1288.07	2326.15	1363.02	1280.6	946.59	1898.22	992.67	2084.47	925.34	1173.57	875.79	1853.26	1624.47	1934.88	807.43	1254.58	1658.86	667.91	1112.65	475.9	598.23	1676.97	991.43	778.9	656.21	643.96	1384.98	1072.66	737.05	623.04	789.49	719.19	1543.32	1070.4	1369.87	1394.33	691.38	2073.52	699.23	1448.81	1166.15	1198.92	1017.8	1078.8	1284.95
200816_s_at	PAFAH1B1	480.85	352.1	362.98	350.87	221.08	274.47	478.25	281.11	340.99	304.1	481.29	430.53	439.39	553.94	403.48	388.59	256.04	358.49	313.45	229.73	513.13	867.28	1133.26	463.85	428.45	440.32	383.94	502.35	448.14	463.09	355.32	562.34	370.91	650.01	568.79	325.81	618.57	404.6	378.94	534.97	248.11	498.91	427.14	429.96	431.6	294.54	534.55	283.28
200817_x_at	RPS10	4520.15	3567.18	7232.4	2615.83	4844.39	6147.16	2908.06	4047.76	3532.68	2921.27	2555.95	5209.96	3081.4	3301.85	4906.21	3778.34	4283.1	2245.73	2331.02	4646.98	5777.98	7313.34	4315.3	2371.61	3448.88	4843.32	2095.73	3712.67	2253.07	3538.99	3444.46	2536.5	3936.02	2610.25	3444.95	3778.39	5026.27	2876.8	3496.39	5647.38	3428.74	2231.66	2959.18	3799.61	6419.57	5774.36	2150.83	3603.41
200818_at	ATP5O	1291.68	868.41	1581.66	1449.6	1506.21	1684.4	694.4	671.01	1189.69	988.89	1550.68	841.22	1107.77	735.32	1018.98	743.94	789.62	486	436.23	1129.04	1407.58	1355.41	1309.1	749.37	855.81	1200.57	1048.41	2657.7	504.02	748.05	1593.32	1006.76	1137.19	844.3	697.32	1233.3	986.59	798.52	1107.12	1871.34	901.05	385.71	728.68	1164.36	1358.51	1624.45	1060.75	862.2
200819_s_at	RPS15	8341	6672.56	8972.96	4915.41	6314.51	7041.57	6662.65	4899.48	9262.09	6407.56	5393.9	5551.86	5014.18	6103.17	5531.62	7861.74	5039.75	4749.11	4934.89	6055.98	6521.78	9444.17	6180.33	4735.44	5824.87	8082.99	6149.05	7465.12	4786.18	5490.7	7624.16	6006.48	6632.21	6755.75	6974.39	4886.1	8892.22	7090.04	8389.34	8162.92	6763.08	3976.58	5983.06	4280.13	7458.46	9814.19	6230.63	5984.82
200820_at	PSMD8	861.04	567.41	675.62	2422.75	995.2	1231.74	636.61	818.74	852.91	738.23	804.57	416.61	851.66	442.62	2942.11	595.17	732.73	1087.22	892.75	1144.27	552.74	930.03	921.37	535.76	862.91	856.51	1083.56	940.98	1054.9	891.35	851.63	449.07	437.37	522.43	810.87	490.07	1001.66	638.81	343.89	1014.17	535.82	1177.72	772.23	1956.99	1768.25	534.89	1037.02	841.37
200821_at	LAMP2	482.78	391.93	847.67	481.76	387.39	606.41	499.64	247.67	211.78	330.87	611.96	427.63	563.86	250.2	261.92	312.45	726.69	931.15	328.84	465.31	654.04	458.12	642.74	305.05	411.14	467.4	275.71	391.02	388.03	339.76	418.15	444.4	338.62	236.34	303.22	681.81	351.13	280.69	152.75	580.84	292.98	653.99	482.88	796.74	516.13	355.11	443.18	383.24
200822_x_at	TPI1	1621.54	2420.16	3283.66	3125.93	2504.09	8171.19	1833.15	4624.12	3724.71	3668.88	1506.51	1772.51	3206.95	1298.27	2098.65	2752.67	3343.46	3061.13	2598.81	3844.79	2068.82	1592.83	1683.39	2498.5	1934.65	1310.24	1951.3	1075.72	1526.06	2227.35	2132.5	1806.93	3740.02	1176.98	2429.34	1790.85	2012.61	1115.95	1028.22	1708.03	3944.29	1744.39	1098.16	2031.19	1419.25	2478.01	1686.6	2602.01
200823_x_at	RPL29	3025.6	2627.92	6651.82	1703.2	2364.68	3515.93	2656.01	1970.98	3547.52	2793.22	2047.84	3474.83	2216.26	3329.69	4088.58	2584.37	3403.46	1580.32	2254.38	4299.49	4073.43	4421.75	3406.03	2745.46	2352.92	3166.18	1647.04	3109.41	1588.45	2242.6	3428.07	2100.11	2614.5	2953.24	2117.04	1729.41	2404.21	3251.35	3830.91	4476.26	1867.62	1247.99	2422.29	3657.75	6007.76	4090.58	2441.66	3066.64
200825_s_at	HYOU1	620.42	850.89	841.9	654.39	1150.89	2100.14	1189.34	772.84	667.6	990.88	757.9	887.42	1730.57	880.55	893.38	1974.03	1075.55	598.02	1600.96	1834.06	554.96	850.58	786.62	980.99	866.82	989.35	793.51	908.02	1766.52	1056.6	530.56	784.39	1543.38	740.36	935.7	882.39	1037.66	955.02	710.14	917.08	669.85	790.97	956	740.84	1985.59	496.21	702.58	721.3
200826_at	SNRPD2	1975.88	1531.11	1712.81	2197.16	2170.37	3030.7	1113.48	1352.13	1925.66	1670.4	1049.46	903.9	1392.82	956.02	1754.71	1022.54	1514.77	1096.32	679.4	3239.49	1264.4	1552.02	764.49	771.28	1397.61	1857.83	1075.62	1721.9	1063.92	2081.51	1903.76	1101.96	1006.65	865.01	1392.11	991.98	1023.6	977.52	1294.98	2087.99	965.21	565.57	1279.3	2187.1	1392.71	1362.75	1065.78	943.85
200827_at	PLOD	292.7	430.41	492.94	344.32	550.62	563.23	723.32	169.7	184.86	553.19	395.15	266.6	313.63	326.21	294.9	315.25	677.55	404.7	794.89	503.68	696.74	437.54	984.8	483.12	439.76	363.85	275.65	254.55	181.98	374.97	391.67	312.6	459.87	224.53	512.6	236.81	431.97	178.08	110.81	476.86	341.99	471.07	222.54	287.45	349.44	201.04	217.3	189.59
200828_s_at	ZNF207	1130.46	802.51	792.08	1216.05	1154.51	1032.14	889.32	819.44	1347.04	1024.83	910.64	749.01	928.8	718.43	964.46	1020.11	1053.66	819.92	755.72	1080.55	786.6	1357.71	1058.31	668.08	972.85	809.22	1108.02	1173.89	1078.32	950.41	1180.53	774.13	942.96	738.24	1306.2	895.22	1243.2	857.5	455.69	772.45	943.26	963.19	1074.29	1119.93	622.71	1050.45	1043.53	1427.42
200829_x_at	ZNF207	876.98	648.92	656.4	844	519.45	814.51	676.98	648.54	989.66	645.73	652.41	544.92	577.69	466.81	534.73	702.34	606.23	751.74	552.25	540.78	806.49	1101.07	801	498.4	606.64	671.54	760.72	789.38	830.7	563.78	804.3	538.9	638.94	496.26	921.74	644.35	682.45	550.66	590.65	643.31	563.74	637.35	752.61	821.26	448.45	974.04	667.64	769.34
200830_at	PSMD2	1098.41	774.03	890.86	1182.68	1571.55	1516.97	1268.52	1848.59	975.96	1166.4	834.36	1583.03	1281.72	434.8	745.63	1164.46	775.11	1323.99	586.76	818.53	738.92	1172.41	709.96	888.97	616.63	1065.22	664.96	981.29	1517.35	841.75	1221.26	576.76	531.08	602.73	837.99	946.23	838.84	857.22	416.56	913.78	1037.68	1181.51	963.98	1596.42	874.89	802.63	769.46	961.59
200831_s_at	SCD	333	435.86	161.05	319.07	248.7	361.2	232.36	566.61	316.86	256.15	167.74	178.34	508.18	181.36	481.92	438.13	347.53	278.32	785.97	666.35	754.68	277.49	230.68	257.04	400.28	200.59	867.76	1143.29	418	674.73	466.57	515.86	154.61	210.08	239.87	332.56	445.77	878.77	149.39	685.39	753.96	511.13	155.3	228.3	331.5	364.93	931.03	406.49
200833_s_at	RAP1B	2159.66	884.71	795.59	1220.48	1070.81	1311.97	934.13	912.59	1144.35	1050.87	1648.46	1121.14	1431.56	1538.78	1309.04	1105.96	1091.95	1006.06	830.09	891.31	1639.76	1107.54	1135.21	975.24	1122.98	718.72	1108.7	1093.45	1127.24	1296.95	1348.72	911.84	774.95	1122.69	905.9	996.5	1045.04	1011.77	1124.63	1736.45	919.07	1250.38	1459.08	823.32	1169.85	1033.69	5889.64	1067.62
200834_s_at	RPS21	6422.82	4016.25	7175.24	3754.57	3785.89	5540.22	2288.81	3873.77	5510.87	3134.93	2884.3	3249.33	2644.5	2477.14	3541.8	3093.79	5172.13	2355.24	1468.35	3821.08	4179.94	2545.33	2712.35	1875.39	2246.44	4934.26	3636.19	2679.75	1172.93	2052.36	4010.61	3365.17	2869.59	1937.97	2253.32	3140.77	2107.68	2210.43	6517.37	5019.37	3071.82	863.27	2721.23	3579.43	6664.1	4723.36	1049.91	3479.27
200836_s_at	MAP4	213.34	298.19	281.08	205.4	265.07	280.86	286.74	265.08	272.81	205.59	211.87	188.97	317.65	295.95	409.34	421.26	332.71	294.31	388.8	481.35	253.37	306.06	249.25	293.5	392.91	257.49	201.79	288.84	204.49	244.4	291.4	279.75	269.87	339.33	305.22	253.54	399.58	385.92	201.1	299.82	275.99	387.5	186.96	336.62	226.82	224.68	224.4	271.78
200837_at	BCAP31	809.08	986.54	1350.26	871.55	939.22	1533.2	1057.51	1036.1	755.72	1915.94	983.05	592.65	1304.99	598.41	1068.73	930.64	1111.36	852.54	687.75	926.11	868.12	680.87	735.96	807.77	729.4	792.1	880.65	1152.84	520.38	1190.84	1034.28	430.13	2000.52	866.2	686.53	1043.01	1208.39	652.72	400.45	1842.05	1018.46	974.49	892.78	1508.99	1331.62	777.26	2612	892.89
200838_at	CTSB	2281.88	2831.38	1139.31	2561.16	2935.76	2337.48	1934.29	2060.1	2678.05	1452.44	4476.56	3458.31	3407.2	3211.04	3934.52	2113.78	2181.28	2063.43	3622.32	3620.88	1617.42	1534.4	1816.74	2134.39	1732.18	2478.69	2322.11	2058.14	2281.45	3881.22	1901.33	2937.34	2388.08	1563.66	1934.35	2378.8	3242.63	2024.22	469.27	3354.1	1092.05	2732.04	2339.36	1517.45	1389.66	1416.49	2911.49	2105.23
200839_s_at	CTSB	2800.34	3677.21	1628.83	3362.08	3267.44	2721.34	2433.37	2751.02	3127.6	1954.81	5346.58	3753.67	3879.36	3877.05	4155.98	2620.91	2475.64	2709.05	3639.61	3862.77	2345.54	2046.83	2262.51	2795.25	2256.86	3058.44	2868.88	2768.6	3286.69	5053.65	2655.19	3471.64	2957.37	2156.26	2689.31	3160.2	3467.09	2896.61	886.91	3905.75	1527.25	3506.83	2780.53	2289.34	1886.26	1743.13	3565.49	2427.78
200840_at	KARS	2028.1	2380.99	3421.81	2639.4	3586.63	2861.82	3256.83	3111.52	3889.82	1817.43	2993.97	2675.34	2360.54	1372.08	1703.1	2375.22	1543.11	2357.22	1666.59	2360.07	2194.67	2104.77	4005.98	2958.32	2764.09	3487.35	2534.87	2067.04	2287.69	3028.3	1283.07	1582.72	1944.63	1750	1580.93	1484.08	2418.02	1271.47	2526.52	2320.96	2211.24	2120.65	1632.28	1890.81	2905.27	1713.84	3470.07	1966.43
200843_s_at	EPRS	1369.4	831.67	992.52	1038.99	1109.63	917.94	608.82	614.84	1200.58	992.2	521.16	1802.66	419.19	354.1	916.38	1187.6	1575.24	1100.97	1386.96	543.8	1220	982.4	628.74	654.29	946.1	1480.39	1015.12	637.62	890.43	1128.92	989.46	873.91	1204.04	524.93	823.12	579.42	844.17	831.7	592.93	751.3	564.76	809.04	791.67	1338.44	1006.65	974.14	656.29	878.84
200844_s_at	PRDX6	2031.83	2547.77	1623.58	1903.58	3254.83	2837.66	2074.1	834.06	1648.38	2641.47	1256.52	836.55	1043.67	1025.63	2401.75	1759.19	3160.19	1602.31	1822.02	3214.22	1116.7	2245.57	1200.39	1442	1845.8	1641.67	1371.89	1177.08	857.45	1221.78	2709.35	580.02	1431.75	1334.32	1838.8	792.73	1167.36	1431.5	793.41	2059.34	1573.22	804.99	1190.89	2291.4	2242.58	1847.66	1719.49	1996.02
200845_s_at	PRDX6	1403.17	1106.69	786.18	892.57	1495.91	1096.28	1711.97	418.39	690.48	1604.78	662.46	518.22	539.73	450.48	1279.3	799.61	1272.44	1110.33	921.25	1207.9	770.53	1359.06	829.05	677.78	1224.89	1070.02	644.01	784.18	715.95	563.46	1589.55	326.82	891.33	742.2	832.53	405.21	504.87	757.35	423.63	1114.41	592.33	343.24	681.25	1068.02	1113.92	1054.97	836.6	1015.23
200846_s_at	PPP1CA	629.82	809.45	530.56	654.03	671.72	1182.08	747.84	721.34	758.5	692.66	828.33	834.03	979.13	700.53	812.22	786.46	685.33	488.83	610.5	710.38	611.61	699.67	1041.49	915.66	676.32	785.12	681.66	776.84	862.67	852.56	523.52	1268.35	792.46	707.15	636.52	786.45	966.62	658.83	1092.96	481.13	1041.4	1032.95	928.19	1376.78	1069.25	878.43	944.03	965.46
200847_s_at	MGC8721	1073.12	1238.55	649.81	953.85	971.39	995.91	1169.39	1008.45	1153.25	633.81	2275.71	1113.47	1397.94	1262.12	1473.32	828.01	798.29	1064.59	833.11	954.41	728.08	2345.22	870.57	808.01	1047.56	1730.38	949.65	1334.8	1126.75	1018.09	1136.48	701.66	1742.03	1295.4	924.63	963.78	907.01	1027.79	1564.44	1085.28	678.67	842.59	1558	648.58	1341.86	923.54	1275.18	1552.16
200848_at	AHCYL1	300.48	191.78	306.07	264.1	245.79	349.54	280.86	444.05	428.26	445.7	278.45	243.36	215.08	198.1	176.66	281.78	156.63	256.53	269.61	177.09	301.63	339.07	433.25	310.81	192.75	378.35	251.75	321.24	351.05	175.28	294.35	297.18	231.64	237.4	185.75	253.66	220.15	199.03	151.09	251.21	427.71	243.6	205.1	389.76	443.89	415.95	270.36	318.44
200849_s_at	AHCYL1	322.53	278.38	363.36	294.68	465.08	414.41	305.21	486.54	470.09	444	316.56	367.03	251.43	268.99	325.24	346.67	257.76	312.11	292.61	194.75	442.6	347.77	485.72	392.95	234.79	393	323.75	397.85	418.22	202.73	355.13	412.91	336.74	303.38	193.43	321.1	400.01	244.31	210.78	282.75	504.25	303.83	223.43	429.63	554.3	502.38	303.01	365.49
200850_s_at	AHCYL1	1128.38	1045.2	1388.84	952.78	1456.43	1378.85	1542.85	2204.82	1675.05	1752.98	1219.51	1286.08	997.08	1044.78	1202.79	1155.01	943.75	1262.31	963.88	756.9	1270.21	1300.86	1706.83	1701.11	948.04	1815.15	1128.16	1342.43	1599.51	852.1	1097.46	1499.26	1183.63	1124.35	863.19	1176.65	1224	838.05	673.72	875	1806.06	987.33	889.15	1533.02	1878.17	1807.41	1042.05	1340.06
200851_s_at	KIAA0174	660.93	791.46	798.29	1080.39	1130.08	708.46	1138.93	903.31	1021.09	642.09	1002.93	807.47	833.94	889.54	830.81	720.58	600.87	712.78	622.4	1052.63	702.86	533.46	964.35	655.85	874.76	822.49	856.7	1033.91	866.32	1139.18	663.51	702.52	855.44	830.15	720.54	614.61	771.05	672.41	913.23	721.31	685.55	814.53	727.48	556.04	853.17	565.82	1256.53	1067.33
200852_x_at	GNB2	537.48	491.8	536.01	605.48	538.67	640.28	361.56	1135.64	396.77	408.39	410.21	419.11	568.88	503.11	730.82	731.37	740.89	382.85	735.01	465.73	561.51	422.7	431.43	775.39	424.13	389.77	563.14	737.37	572.49	567.93	675.91	1144.15	750.87	607.14	522.58	469.05	1217.84	534.02	221.92	656.63	495.3	918.72	412.8	450.16	789.69	472.97	374.97	677.68
200853_at	H2AFZ	2402.4	1436.84	1369.32	2373.33	2811.49	1836.33	1570	1017.31	4007.61	2511.22	1568.82	1766.1	2622.41	687.64	1471.37	2120.32	1323.87	1383.38	1380.75	1669.27	2303.82	2172.96	1241.11	912.37	1468.45	1354.05	2691.13	1952.85	1279.75	2533.54	2150.1	1354.79	927.19	768.22	1555.26	2362.84	1430.72	1458.63	804.74	1797.01	2044.78	1768.11	1919.48	1877.41	1512.15	2162.14	1387.56	1682.41
200854_at	NCOR1	167.38	209.21	166.41	252.48	220.5	176.43	274.02	150.17	166.2	119.46	233.42	207.15	197.29	221.97	263.03	325.14	217.57	176.37	166.19	237.23	235.28	329.23	222.21	504.9	232.29	253.61	308.6	206.9	288.31	253.75	215.32	320.41	225.05	308.09	258.1	182.05	314.67	171.77	297	196.26	137.95	208.55	259.09	310.55	174.24	129.77	225.51	252.05
200858_s_at	RPS8	2961.98	2190.73	4673.32	1932.97	2229.8	2720.95	1769.03	2095.09	3570.69	2765.55	1894.64	2474.54	2511.64	2398.38	2119.29	2237.89	2572.34	1116.03	1212.98	2975.87	3406.29	3558.16	2573.86	2118.34	2590.08	3255.87	1591.34	2239.11	1451.38	1989.81	2048.24	2079.36	1760.51	2098.03	1826.5	2006.64	2100.02	1525.21	2832.27	3005.78	2225.51	1453.11	2474.12	3093.62	3969.44	4146.72	1596.52	2325.14
200859_x_at	FLNA	678.52	1253.56	1022.49	557.36	1162.52	868.13	1144.3	905.38	620.49	872.74	771.19	959.15	1825.35	1377.99	918.89	1136.32	908.51	602.44	781.37	1236.27	878.55	570.25	928.11	1393.67	1029.22	1037.22	1133.13	811.07	741.1	2003.05	512.88	1111.2	1133.34	1630.46	1700.96	918.43	2042.06	1135.83	422.68	1265.36	1272.6	2258.83	426.32	974.02	876.16	671.76	1553.97	864.11
200860_s_at	KIAA1007	530.38	927.19	585.08	802.39	592.13	587.05	792.24	1044.2	1237.74	759.63	723.5	899.59	892.17	538.27	821.84	777.6	669.6	558.27	842.44	922.83	614.39	519.35	630.51	694.01	685.96	696.3	636.8	642.28	979.11	808.67	549.67	718.53	717.45	580.02	641.69	597.61	686.91	477.71	752.39	524.43	855.24	1086.6	529.05	423.43	673.19	445.88	508.78	829.24
200863_s_at	RAB11A	1596.21	848.66	668.93	2135.51	1354.98	1303.26	852.62	2189.57	1484.82	980.89	1782.73	1331.48	1794.28	943.72	1699.57	942.09	1072.25	873.35	631.09	960.81	1493.95	768.58	742.62	886.33	871.29	748.1	1758.84	1413.34	848.33	971.13	1202.92	1185.01	1490.05	1185.55	881.52	2816.2	1337.66	1137.61	888.27	1164.57	1153.14	915.85	1527.87	853.12	900.3	883.57	859.27	1033.79
200866_s_at	PSAP	3211.43	1545.36	1198.02	2355.4	1902.99	1517.79	2018.63	1074.12	2280.63	1718.57	3059.88	2311.81	2276.99	1938.21	3268.98	3152.18	2866.39	1876.96	1914.31	2367.52	1792.94	1121.54	1244.84	1136.23	1582	1443.48	1820.09	1451.04	1688.27	2147.11	1293.99	1830.35	1758.19	2046.45	1618.88	1758.34	2297.53	2017.26	745.08	1704.33	858.51	2180.75	1918.3	1200.47	1623.23	1033.7	2064.56	2633.43
200867_at	ZNF313	737.64	499.23	368.02	268.38	504.4	381.93	457.96	344.14	323.31	441.43	477.52	247.05	230.25	193.02	424.07	352.33	341.37	404.98	411.37	208.95	315.88	319.9	434.78	1472.11	794.24	254.57	248.4	341.28	480.35	214.22	283.13	252.01	310.68	278.13	259.98	333.6	206.93	248.1	264.6	451.93	289.35	339.05	451.68	174.42	192.97	223.84	386.27	360.41
200868_s_at	ZNF313	610.34	341.78	269.9	257.06	678.39	327.13	229.35	185.67	314.32	599.62	381.91	166.4	166.74	133.79	430.17	323.12	552.54	178.98	476.5	235.72	171.61	234.24	244.17	1143.68	514.38	232.21	265.78	311.46	284.69	212.47	308.64	172.14	192.37	180.04	200.66	356.19	226.46	210.95	114.62	484.72	336.43	272.18	464.07	198.61	173.56	183.35	569.36	410.86
200869_at	RPL18A	5380.33	4628.83	7038.28	4955.86	4627.85	4502.95	3897.69	4890.12	7880.59	5333.78	3951.85	4807.96	4843.2	5027.32	4413.66	6040.51	4813.15	5805.44	4740.36	4385.24	5321.54	6459.85	5319.67	5992.35	5622.95	6880.09	5964.91	5033.29	2725.72	4829.54	3910.03	2786.71	2632.33	3972.54	3739.33	3919.29	3733.28	3980.92	5650.34	4867.93	5104.31	3573.17	5135.48	7484.78	7565.14	7736.45	3901.93	5445.8
200870_at	STRAP	1213.6	783.04	2261.78	718.87	593.59	4075.74	460.05	2098.75	1099.56	2679.22	1011.41	605.16	1329.41	633.81	677.67	1198.22	1883.2	777.81	501.19	2514.78	1708.95	1230.21	1358.66	1199.84	630.03	609.54	886.19	1439.5	853.65	1089.66	981.84	863.92	893.65	763.77	1058.36	603.16	1294.22	619.06	540.42	1234.08	1469.89	887.18	916.46	924.69	960.01	1122.23	1506.01	625.1
200871_s_at	PSAP	6631.64	4499.65	3636.59	5017.38	4639.11	3992.05	5479.01	2801.91	5057.28	4258.42	6530.79	5307.6	4747.25	5181.32	6662.82	6026.65	5883.74	4997	4274.63	4610.01	4730.3	2885.53	3529.07	3239.49	4237.43	4219.46	4036.33	4519.45	4319.85	5093.3	3183.1	4243.91	4241.96	4414.71	3642.16	3903.73	5138.68	4652.44	2828.66	4035.19	2733.06	4766.49	4147.34	3408.73	4022.17	2688.74	4383.91	4805.28
200872_at	S100A10	2344.26	4414.46	1977.67	1922.45	1810.3	3971.95	1510.83	2889.01	3638.05	2307.08	2963.5	1880.66	5234.06	1814.75	2980.98	2290.25	3027.89	4289.86	3420.67	2893.77	2068.73	1300.95	4194.11	2956.56	3263.21	3260.15	3689.04	2662.83	2096.14	3057.64	5513.54	4813.95	3936.81	2705.57	2247.59	6084.23	4341.97	4101.96	1009.76	4124.87	577.08	9597.37	1895.41	1801.69	1467.45	2554.85	2496.22	1156.34
200873_s_at	CCT8	1517.35	1244.81	1997.42	1158.67	1274.96	1632.09	1364.27	854.54	1418.62	1666.45	1579.61	708.79	1432.05	943.34	1107.4	1284.96	1184.97	846.74	1032.66	1335.95	2115.81	2061.31	1422.3	1015.59	1230.22	1675.8	1242.27	2444.77	812.76	985.42	1412.63	1397.16	1374.48	1014.28	659.67	965.59	1281.78	690.8	1249.55	2182.33	1622.83	929.8	1312.76	1370.48	1680.19	1633.5	1785.86	1128.29
200875_s_at	NOL5A	481.66	987.21	1598.33	674.79	1201.91	973.07	836.31	462.32	994.07	1065.05	853.24	571.67	789.24	568.79	637.43	817.61	986.73	417.83	657.43	363.44	1496.51	1123.74	957.01	732.67	594.81	861.61	912.89	440.26	597.68	831.29	672.88	501.84	635.15	538.11	637.34	627.78	610.69	583.98	708.58	914.4	2087.44	589.24	1040.74	1023.01	1017.98	912.87	955.31	719.73
200876_s_at	PSMB1	1367.67	708.04	1357.08	690.92	1428.08	1623.08	646.78	729.93	1507.3	944.04	1389.65	782.64	1422.06	655.58	944.96	825.05	1128.32	626.1	743.87	906.97	837.36	1636.59	1104.13	819.54	979.38	1563.27	944.52	1680.68	823.75	710.78	1347.36	844.07	1222.42	633.49	1015.06	1304.01	1128.78	870.34	679.3	1279.22	1041.56	333.95	674.01	795.67	1400.75	1260.43	926.26	1085.13
200877_at	CCT4	1962.69	1380.22	2593.31	1822.68	2841.93	2329.15	1021.73	2426.94	1953.9	2276.97	1251.18	1323.58	1276.32	957.28	1576.69	1773.32	1891.6	2602.37	1763.71	1545.59	3467.52	1887.52	1857.56	1802.54	1359.4	1908.74	1400.61	1370.65	1249.64	1873.58	2020.84	1499.22	1565.2	1293.3	1507.99	1627.94	1634.49	1146.85	840.08	2022.83	1538.24	1903.72	1994.92	1810.67	2179.3	1821.25	1489.22	1219.6
200878_at	EPAS1	258.89	593.86	482.42	845.54	400.4	2169.31	423.24	1740.69	587.29	354.58	805.42	543.77	925.97	2819.41	659.88	756.01	371.86	395.17	540.11	717.65	763.01	353.77	607.61	935.68	549.47	891.44	1045.08	790.99	886.47	829.34	1045.65	658.09	1407.38	2203.76	406.87	569.32	1164.73	2077.72	425.85	873.74	309.49	1142.45	1556.2	242.44	561.25	1099.37	1503.24	1101.42
200880_at	DNAJA1	813.92	385.74	927.65	369.36	756.47	617.65	666.17	360.37	783.78	449.12	580.92	303.38	243.4	260.61	563.25	807.06	550.22	803.34	476.83	348.68	711.75	433.4	439.39	250.91	555.33	236.47	368.55	390.53	341.17	301.81	773.96	222.76	520.45	350.23	320.44	333.94	347.21	364.7	192.25	795.17	216.05	247.68	740.16	602.55	654.56	386.83	434.04	385.1
200881_s_at	DNAJA1	1681.62	1310.99	2130.52	1348.76	3034.67	1968.48	1686.51	1613.53	2101.63	1800.6	1623.9	966.89	831.28	737.48	1745.55	1955.51	1855.36	1537.5	1117.66	1311.9	2068.08	1506.36	1465.12	630.18	1323.26	667.73	1441.78	921.22	758.04	1168.58	1865.66	825.61	1574.44	928.91	639.76	1355.07	1101.54	860.82	494.07	2097.02	1175.45	852.96	1948.84	1659.18	1459.89	855.03	1129.8	1463.36
200882_s_at	PSMD4	1010.87	1166.1	686.34	801.33	1421.63	1881.57	1158.95	660.05	851.76	1053.81	755.75	724.1	610.41	546.34	762.54	1519.18	1113.82	1120.4	1040.53	999.5	1256.52	937.28	794.43	459.11	1030.87	755.71	745.76	651.13	673.78	611.48	1334.07	325.48	859.84	447.27	655.92	849.89	699.53	734.4	450.31	821.4	631.22	608.08	640.31	1064.9	1008.34	823.89	742.1	1057.13
200883_at	UQCRC2	581.5	258.46	624.06	449.44	588.14	1087.39	295.58	371.78	503.51	637.97	431.86	369.58	259.9	301.53	500.3	397.24	281.58	406.67	243.25	382.03	350.77	312.58	461.16	308.95	258.01	450	354.89	421.21	223.95	374.26	686.76	255.63	462.17	277.01	258.1	197.56	299.33	263.04	202.08	571.84	468.83	142.11	388.04	417.6	258.81	712.35	670.95	211.01
200886_s_at	PGAM1	1391.41	1770.79	1305.5	1889.78	1646.99	2281.68	1384.33	1551	1694.5	1968.8	1596.78	1653.99	1491.82	1305.01	2018.83	1417.25	1565.06	1921.04	1717.87	2092.87	1814.96	2053.75	2258.12	2395.09	1308.4	1889.95	2152.35	1725.13	1890.88	2058.68	2472.13	2083.85	1889.03	1311.71	1495.75	1547.73	1942.81	1481.45	1222.79	3479.59	1785.41	2336.64	1725.44	1616.2	1420.69	1766.01	1835.19	2356.08
200887_s_at	STAT1	2568	2751.08	755.33	2194.17	3150.25	704.37	4154.81	1538.48	2213.13	1484.11	4665.47	2651.15	1703.72	1005.48	2800.38	2918.25	2579.49	2875.73	2205.12	3182.18	2025.14	2956.93	1852.62	1646.93	3361.66	1634.68	1958.77	1202.7	1584.32	3610.51	1199.28	1706.92	1007.86	1251.39	1669.87	1818.64	2354.89	1121.15	997.9	1543.57	1057.01	1763.03	3831.85	3049.62	2296.56	706.9	2737.82	3279.74
200888_s_at	RPL23	2857.47	1817.48	3592.54	2915.85	2380.09	2371.75	2088.21	1439.22	2815.14	1341.4	2200.5	3036.02	1618.68	2592.91	2617.86	1690.94	2103.03	1094.52	971.48	2667.55	3396.77	3750.38	2844.58	1627.05	1260.77	3624.74	2149.43	8949.36	6138.64	1623	2843.15	6490.03	2460.02	2762.98	3297.57	2607.28	2820.84	2811.66	4610.64	3240.58	1201.03	615.86	5366.57	5039.72	4227.14	5709.45	5061.24	3947.02
200889_s_at	SSR1	476.04	279.89	296.46	368.72	394.97	547.69	178.92	259.19	186.94	353.81	477	403.4	383.45	294.18	335.92	385.62	313.44	200.87	380.81	539.77	248	594.95	275.07	139.54	285.72	300.42	395.61	337.95	182.48	354.37	390.81	205.81	611.36	212.5	228.95	399.26	458.1	162.7	106.28	409.48	222.08	582.86	460.18	332.83	186.75	135.8	470.49	427.75
200891_s_at	SSR1	2993.25	2514.86	2507.9	1952.06	1694.4	2108.04	1983.3	1763.93	1256.61	2099.2	2627	2712.33	1917.07	1900.45	1344.72	2367.12	1711.68	2519.1	2633.77	2082.61	2865.25	3622.13	2141.81	1615.06	2400.87	3019.27	2235.37	2432.16	1680.18	2159.91	2166.01	1454.2	2665.96	1435.63	1325.4	2077.91	2017.51	1244.5	1569.83	2283.2	1604.86	3507.43	2541.12	2018.33	1364.96	1328.91	2501.8	2187.04
200892_s_at	SFRS10	525.21	445.07	433.62	613.74	786.56	634.42	581.21	551.69	635.3	566.67	571.73	854.04	592.57	414.29	459.5	524.77	453.3	470.31	458.4	387.44	591.95	762.29	444.93	371.18	333.9	409.72	458.08	440.64	567.55	528.75	555.06	411.44	360.48	423.25	589.42	649.96	425.64	554.88	301.26	480.24	984.02	374.69	555.78	607.68	443.85	339.71	467.19	617.14
200893_at	SFRS10	1881.84	1735.71	1903.31	1838.18	1408.58	2185.77	2374.28	2138.49	1826.24	1564.56	2053.38	2601.4	1937.63	1593.57	941.01	1777.13	946.57	2025.99	1492.01	1133.67	2068.57	2318.85	1497.55	1576.76	1270.22	1680.21	1474.71	1802.49	2257.83	1597.44	1667.63	1480.8	1415.09	1470.28	1921.08	2018.86	1262.52	1807.5	1612.14	1470.79	2330.23	1016.92	1830.72	1974.37	1590.94	1588.29	1418.34	1550.36
200895_s_at	FKBP4	476.33	1091.79	1733.97	734.75	792.61	1432.25	971.62	2121.62	1015.78	1517.88	352.1	442.98	945.89	205.36	664.76	559.24	1659.3	817.66	735.77	1028.73	726.6	739.13	540.54	655.1	814.72	279.45	516.81	610.08	260.57	332.98	545.3	362.91	1412.9	384.7	339.26	179.27	360.03	348.76	239.92	441.96	635.21	256.69	388.02	531.07	1330.76	1041.45	671.99	768.06
200896_x_at	HDGF	2287.09	2349.22	1227.81	1754.57	2809.01	1706.3	1691.49	2424.94	1562.3	2423.52	1135.03	1822.2	1370.65	750.07	1632.78	1321.53	2915.5	2734.72	2307.94	1780.3	1680.74	1107.18	1112.86	1896.11	1951.58	1540.54	1087	750.67	1641.05	1641.31	2224.67	1316.36	1994.89	847.58	1928.72	1974.08	1752.99	1215.91	493.16	1187.51	1740.35	1140.34	1148.41	1939.43	1490.96	1081.54	926.37	1423.31
200897_s_at	KIAA0992	768.3	916.65	853.6	1105.43	322.96	851.55	565.04	280.23	1151.86	1864.75	1414.74	705.2	2915.12	2004.2	693.36	1105.03	683.85	1249.15	1321.73	553.94	1578.16	426.14	1504.03	2221.89	1150.5	1299.94	2186.32	1807.65	2387.22	2146.2	1052.28	1612.08	1274.89	1889.13	1903.09	967.57	1052.48	1651	236.91	1732.57	548.95	2785.37	1273.99	503.82	820.73	1589.99	2381.79	775.49
200898_s_at	MGEA5	318.65	399.55	399.12	373.3	285.31	293.98	513.51	255.6	321.92	247.19	474.09	262.49	422.21	509.36	410.9	404.88	558.48	358.51	318.73	486.13	313.88	496.42	302.42	241.62	434.82	304.71	337.6	393.18	326.51	410.13	387.03	484.59	418.44	482.12	331.4	365.82	451.32	543.15	404.61	613.27	593.98	389.35	435.93	495.09	208.66	308.65	481.73	760.51
200899_s_at	MGEA5	377.01	377.74	598.01	347.12	254.56	219.2	733.69	257.28	332.75	176.43	521.42	370.15	308.56	563.63	518.56	387.77	389.11	447.41	239.61	372.55	653.76	600.79	436.73	306.67	452.63	466.11	365.71	502.13	431.33	376.39	360.49	578.82	524.05	578.28	308.74	311.26	362.51	550.72	644.28	728.34	261.85	399.79	434.65	380.84	246.06	564.58	492.18	544.92
200901_s_at	M6PR	647.54	516.85	421.52	506.64	614.5	1807.98	601.09	642.74	762.17	858.7	753.77	678.48	849.3	510.78	820.14	632.08	949.98	506.64	571.07	1229.66	651.24	365.26	486.72	351.07	338.63	267.96	431.92	576.82	355.18	599.71	419.7	395.66	702.69	364.1	422.86	287.58	571.42	411.45	490.48	474.95	591.69	325.9	661.21	465.06	275.42	400.31	498.84	629.46
200902_at	38245	1058.69	461.38	799.53	622.63	441.94	1141	577.38	688.45	753.38	780.74	881.7	632.46	643.33	756.17	424.84	738.87	605.66	374.48	544.81	497.37	739.41	829.85	695.01	549.64	284.71	762.29	593	661.53	828.04	754.25	642.86	382.89	437.99	487.44	331.06	760.5	405.15	380.76	417.64	903.18	379.83	542.03	784.56	561.79	722.01	551.78	829.89	547.82
200903_s_at	AHCY	429.36	544.09	1517.81	308.64	670.77	769.68	237.58	540.64	345.39	355.99	265.59	330.55	294.4	253.33	270.11	388.35	763.81	200.63	503.89	547.43	612.55	702.74	475.58	798.01	381.08	467.81	331.98	439.26	572.73	416.11	368.14	366.33	432.32	347.9	427.44	344.13	437.71	272.81	168.81	892.1	701.85	252.73	624.01	330.82	594.1	388.28	498.08	496.46
200904_at	HLA-E	1408.16	1215.54	531.51	644.61	906.02	508.86	1434.89	486.07	794.81	398.98	1303.91	1017.45	1033.38	1338.92	2284.45	1245.06	546.53	922.84	629.7	842.89	974.95	1398.51	747.11	401.79	1031.15	728.32	748.05	709.74	703.51	1252.59	537.17	561.16	572.05	1301.22	571.86	1114.29	1618.08	691.8	1379.8	758.15	283.55	605.01	1304.1	432.45	580.69	455.5	749.12	895.75
200905_x_at	HLA-E	3633.84	3212.71	1445.06	2183.6	3865.65	1964.39	3591.37	2448.89	3382.05	2079.56	4431.08	2399.15	2978.83	3207.72	4702.14	3851.34	2210.91	2725.79	2716.79	3134.25	2055.14	3302.01	2011.6	2010.62	3683.5	2389.09	2410.76	1639.33	1903.92	3249.77	1841.98	1779.42	1895.77	2516.37	2028.42	3086.75	4236.78	1794.34	4084.93	2255.2	1391.36	2235.01	3556.74	1766.79	2034.39	1463.98	2066.79	2736.77
200907_s_at	KIAA0992	520.56	605.78	552.2	673.02	445.05	561.33	325.14	243.17	1077.77	1741.68	855.07	383.77	2183.96	1502.17	854.95	734.99	512.75	1038.28	801.15	341.37	950.17	292.43	1413.66	1980.31	1042.1	1266.28	1799.64	1243.65	1444.72	1370.53	674.96	1029.63	961.49	1438.3	1387.34	569.91	925.55	1152.57	185.15	1154.33	383.09	1850.09	751.47	307.37	731	1395.22	1632.19	514.59
200909_s_at	RPLP2	5793.65	7634.21	8346.83	5502.34	4545.67	5799.1	7430.22	8684.7	8643.95	6467.24	4003.98	5176.17	5068.24	6251.56	6235.8	9191.84	8942.74	5956.78	5590.82	4411.63	7688.28	9852.6	7699.84	6635.05	5421.71	9219.34	5624.41	4759.07	5247.14	5339.03	3867.16	3543.49	6031.18	5699.24	5051.39	4876.98	5809.13	6191.22	7057.11	5566.04	11116.6	3711.57	6437.41	6069.98	9584.64	5934.03	5817.09	4849.38
200910_at	CCT3	1765.33	2262.25	1759.65	1508.57	3024.81	1626.45	1818.55	1399.92	1807.85	2111.93	1103.25	1045.43	910.14	651.42	1309.75	1171.73	2036.93	1382.09	1083.04	1458.71	3341.47	2420.06	1011.98	2191.37	1527.02	1641.79	1163.31	911.06	1047.59	1347.7	2375.54	908.58	1465.79	1002.55	1342.78	1250.66	1166.54	1043.46	721.31	1554.45	1372.33	679.01	1335.37	2562.47	1834.32	1663.25	1184.92	1410.55
200911_s_at	TACC1	685.02	739.63	397.72	648.48	749.64	279.49	857.61	340.51	830.41	540.13	1023.83	670.12	801.77	1151.29	841.28	668.72	423.62	412.88	494.63	609.45	733.67	862.31	658.14	507.77	629.34	376.82	638.31	657.73	554.32	787	518.22	681.66	578.17	1746.93	644.46	683.67	1110.77	1575.91	1084.78	429.31	273.4	681.13	728.25	225.17	551.48	373.4	863.23	330.33
200912_s_at	EIF4A2	3298.22	2627.62	3773.57	2580.19	2761.79	2146.34	3740.45	2732.8	3357.11	2490.71	2821.35	3632.57	3041.34	2826.43	2653.09	2267.54	2746.14	2696.67	1359.46	1867.82	2726.19	4149.16	2777.99	2276.62	1948.6	3034.54	1656.39	2300.34	1814.04	2292.85	3189.07	2209.44	2275.35	2771.1	2121.15	2262.64	2281.29	3308.61	2427.58	2464.23	3878.49	2012.66	2994.57	4194.57	3180.73	2637.05	1636.75	2134.91
200913_at	PPM1G	539.86	436.95	376.21	307.51	475.9	574.52	386.46	638.34	364.7	555.6	252.12	435.98	560.98	236.71	352.55	507.22	438.35	381.17	715.85	420.1	490.53	313.13	338.78	349.48	358.92	365.8	341.95	313.83	500.35	394.22	361.61	429.9	339.75	251.92	258.26	309.57	564.02	276.96	239.65	400.68	354.06	509.84	403.67	261.48	311.2	333.49	244	287.84
200914_x_at	KTN1	266.56	461.91	345.09	388.5	178.38	596.93	255.16	454.97	363.49	593.91	262.23	247.2	289.97	430.81	174.58	260.6	196.57	293.24	187.59	106.22	438.75	312.02	577.06	335.42	379.33	279.47	522.64	196.91	325.73	434.58	282.66	404.85	245.36	345.05	159.17	347.49	299.53	689.71	451.92	216.51	273.92	423.99	303.18	366.82	518.59	676.54	307.86	351.48
200915_x_at	KTN1	755.94	1132.63	802.83	1185.86	676.64	1595.88	674.88	691.32	598.61	1099.64	720.77	691.65	641.3	753.58	813.65	734.17	811.62	703.94	867.13	729.19	1391.58	1040.03	1096.74	694.2	596.05	470.47	990.51	693.75	934.46	1444.08	1094.35	1096.35	805.07	911.98	749.17	1275.03	750.24	1633.87	654.91	744.28	704.51	1480.79	1091.65	1011.76	789.82	1288.3	1358.37	1439.94
200916_at	TAGLN2	2572.83	3435.34	2014.29	2371.74	2995.26	4213.13	2638.58	3457.87	1985.96	3130.71	1826.07	1984.36	3391.45	1690.54	2424.04	2991.31	2981.01	2547.9	2976.1	2931.65	2437.4	2373.02	1243.06	1553.35	4210.49	1563.1	2516.71	1820.82	1753.04	2132.58	4457.8	3675.37	3904.98	1631.96	3681.81	5188.83	2740.8	2822.41	622.54	2911.47	1701.22	3470.31	1598.41	2204.78	1564.72	2270.36	1621.84	1854.89
200918_s_at	SRPR	871.81	1038.66	997.36	1170.66	765.74	1577.87	1321.7	1099.06	946.93	1015.59	991.36	1545.14	2115.09	1244.19	1253.9	1610.34	1494.4	1035.57	1761.72	1276.69	708.17	701.23	1103.38	1415.17	1346.61	932.08	725.3	1214.73	1737.12	1843.31	685.79	1077.98	1942.82	998.9	1119.16	1153.07	1191	1193.65	1221.19	698.69	1169.37	1528	1542.82	673.57	2643.03	946.56	1309.53	1791.17
200919_at	PHC2	488.32	719.79	732.75	584.67	706.17	649.64	523.02	521.73	580.33	1026.93	597.07	449.16	1136.09	943.86	570.86	539.28	686.32	786.12	921.3	571.94	672.83	872.13	824.19	1243.32	873.99	443.38	535.88	556.53	459.63	559.73	591.82	908.74	436.07	688.01	755.02	733.52	682.42	598.82	283.73	437.2	813.54	859.7	601.79	826.97	464.21	453.1	438.5	570.45
200920_s_at	BTG1	1251.68	2035.53	1153.78	918.93	1351.35	1232.34	2091.35	1694.6	2127.89	1450.65	1621.8	2278.08	1854.93	1787.16	1222.85	1419.47	1406.6	2689.48	1160.88	1220.27	1282.74	898.48	2132.03	3707.22	2298.9	2530.4	1705.69	1118.35	1107.67	2269.6	836.45	1989.79	2441.59	2403.42	1714.71	985.4	1179.86	1840.32	4432.15	1351.96	2993.95	1095.45	1615.99	1033.46	2357.35	2623.66	801.88	2253.89
200921_s_at	BTG1	1069.45	1242.1	1211.11	927.4	734.03	1268.23	1475.63	800.71	1095.7	598.76	1598.87	1815.58	1723.31	1358.16	889.78	1133.44	1152.38	1383.48	869.56	981.53	1210.84	898.37	1054.56	1556.79	988.69	1408.77	787.97	1269.94	1004.13	1751.39	648.47	1315.64	1758	1421.25	1197.14	700.97	797.99	1357.7	2383.96	1181.85	1794.11	868.14	1487.35	856.11	1202.44	1337.07	738.27	1302.15
200923_at	LGALS3BP	1604.5	2459.24	354.34	2836.26	2805.81	1612.31	1819.03	2419.34	1504.71	1704.22	2030.43	1566.63	1087.14	854.1	2270.66	3235.01	2215.88	2469.53	3413.24	2213.02	972.97	1455.15	1611.06	959.39	3627.69	1264.55	1727.94	606.5	4098.5	2224.22	2395.3	943.11	910.59	1334.25	1976.35	3295.94	2591.25	755.27	143.75	684.97	1701.6	1560.25	3126.55	648.01	2123.43	531.6	1076.03	2962.25
200924_s_at	SLC3A2	293.96	386.74	607.17	472.37	411.03	635.06	455.52	627.96	390.32	381.14	331.46	454.61	500.57	280	359.69	373.25	701.73	341.37	343.19	598.95	365.47	228.22	602.44	373.92	346.36	273.12	365.66	510.36	232.05	509.8	357.47	634.06	741.49	426.4	332.01	294.53	468.14	484.64	201.51	323.57	384.92	555.28	394.06	704.31	394.37	462.34	545.61	468.07
200925_at	COX6A1	1950.68	1230.84	1412.54	2252.45	1632.48	2658.1	1209.27	1301.26	1166.3	1560.73	1004.31	1203.88	1260.87	860.12	1663.84	1032.62	2742.72	796.95	886.5	1888.93	1797.42	1266.35	1139.21	813.53	1144.98	1720.03	1010.24	2184.22	1044.63	1700.51	1895.6	1024.48	1432.11	972.6	1545.68	1336.37	1294.61	1555.94	639.98	1903.35	1399.7	558.54	1424.19	1511.13	1963.11	1448.68	3453.67	2024.56
200926_at	RPS23	6894.25	6406.56	8148.04	6859.3	5815.27	7190.38	5863.37	5363.93	7248.09	5436.09	5801.24	5986.98	5022.7	6475.22	6887.66	6175.63	7150.78	3627.49	4207.92	7172.57	6775.79	7949.61	7034.31	5045.11	4125.15	7713.54	5378.8	5450.51	3899.23	5604.07	6103.19	5113.71	5706.79	6778.04	7580.33	5670.74	5237.46	6638.33	8890.3	5174.39	5964.12	2672.33	6163.8	4140.61	6417.45	9009.98	5064.85	5668.4
200927_s_at	RAB14	437.29	317.11	436.56	451.67	285.64	424.18	282.95	382.77	455.22	321.18	614.19	446.31	517.93	404.62	467.34	400.12	326.22	581.73	419.6	507.73	420.73	557.13	532.92	420.02	554.31	265.29	483.65	705.05	532.71	576.95	757.34	470.38	568.16	605.58	514.6	751.17	441.23	604.38	201.19	448.38	344.24	769.51	773.67	399.62	470.98	486.81	697.39	642.65
200929_at	TMP21	588.26	563.95	490.08	721.32	933.29	1235.85	599.89	1093.02	583.44	664.36	973.87	688.77	730.99	664.39	714.64	615.22	695.04	711.06	816.79	936.54	636.41	692.53	427.96	711.81	555.54	631.29	1097.21	719.65	634.48	693.33	1050.56	561.37	1295.25	551.18	475.17	1171.08	684.03	481.6	385.3	897.95	1241.87	719.64	914.72	935.61	948.89	905.1	1143.52	1972.01
200931_s_at	VCL	697.23	897.67	737.03	1063.77	273.37	1407.11	480.74	395.25	432.35	423.16	758.7	671.79	1301.9	1015.67	798.84	592.7	1117.43	718.35	701.81	763.81	882.94	417.21	821.18	983.05	510.29	1353.69	752.49	834.38	998.49	1035.99	661.72	1401.47	1265.08	1097.75	775.68	486.21	1332.43	824.6	165.93	640.16	1118.08	1757.57	497.43	664.59	379.27	925.33	900.31	682.03
200932_s_at	DCTN2	514.46	407.73	544.02	495.54	437.35	654.83	338.83	416.73	395.99	330.96	357.02	598.11	659.35	491.37	472.32	386.92	473.23	411.17	353.88	514.42	439.77	650.54	432.16	409.98	556.89	369.11	540.2	634.97	508.87	476.02	837.58	472.63	502.51	560.83	476.76	437.46	618.46	670.81	379.41	491.77	611.79	515.96	383.48	416.75	492.85	607.12	2747.72	669.96
200933_x_at	RPS4X	10824.2	7900.04	9779.51	6807.24	5631.89	8294.18	7822.08	6987.68	7430.17	9090.9	7431.85	7586.61	7807.01	8342.53	6985.49	7852.22	8696.72	6024.87	4988.42	7797.38	8884.38	10076.5	6813.47	10749.7	8404.9	11027.1	6821.22	6598.52	5396.94	8056.58	6696.52	6215.84	8970.21	9287.59	6768.39	7488.49	8425.14	7091.67	9474.14	9215.93	7900.04	6590.66	7798.84	10089.4	11955.5	10143.9	7450.96	7369.66
200934_at	DEK	2086.75	1095.68	925.9	1450.36	1394.98	952.82	973.36	1454.34	862.7	1314.44	1614.27	1452.33	1396.99	619.82	575.87	959.25	756.08	1960.44	938.73	931.99	1826.66	3193.79	1940.27	683.64	1271.98	1525.75	938.2	515.43	2054.82	1996.15	1038.17	1812.72	594.29	544.74	1148.72	1796.84	1405.15	1122.38	701.32	826.55	2031.81	1856.12	1341.51	1465.12	1508.14	445.87	1020.05	942.63
200936_at	RPL8	5269.1	6259.29	9363.28	3059.16	5563.1	4618.01	4890.11	4396.89	8227.69	7639.1	2667.84	6064.22	5839.49	4245.96	4339.52	6911.72	6694.66	4601.77	8333.73	5579.78	5779.82	8090.67	6103.21	5689.65	3578.98	5684.95	3481.75	3692.28	4142.75	5031.5	5798.7	3448.79	4372	3663.16	3760.54	4488.71	4680.84	5620.07	4664.16	9571.84	5038.5	3562.18	4307.62	5197.23	11456.6	5434.02	4870.92	7078.61
200937_s_at	RPL5	2679.04	1716.17	5264.76	1734.81	1943.61	2719.33	1884.24	2014.22	3254.39	2264.72	1407.47	2189.96	1369.72	2347.48	1568.55	1703.99	2426.77	684.75	1204.45	2484.86	3324.25	2478.16	2545.92	2224.42	836.37	3178.7	1464.58	1837.07	1336.85	1826.9	1656.94	1473.98	1798.79	1638.47	1526.03	1642.75	1777.71	1267.23	1942.63	2435.63	1880.54	1335.92	1553.7	1707.78	2952.64	4098.9	1161.04	1585.97
200941_at	HSBP1	341.2	294.16	561.03	354.31	408.04	424.78	226.21	458.05	291.31	146.75	389.53	490.32	245.23	378.6	412.68	216.09	179.28	415.51	147.73	134.5	360.54	262.89	548.14	296.13	255.55	623.31	395.77	591.58	279.13	416.94	363.75	288.19	658.24	306.4	248.95	241.7	256.32	224.37	230.18	560.88	165.69	266.88	331.05	177.19	627.57	315.96	466.2	478.69
200942_s_at	HSBP1	345.59	412.97	497.16	620.04	882.77	623.02	225.94	654.56	477.79	202.85	416.08	388.81	373.55	264.93	460.37	309.55	410.92	320.16	257.21	342.33	278.87	274.97	306.17	228.2	388.66	487.26	531.83	654.27	283.39	628.23	515.31	231.28	530.61	297.83	302.77	508.32	335.65	197.28	135.36	442.16	273.07	503.63	383.49	339.28	737.87	325.59	1012.73	655.98
200943_at	HMGN1	1637.5	1618.35	2657.67	1339.77	1645.21	1822.87	1652.06	1124.85	1270.18	1459.25	1539.8	1738.31	1654.82	1429.52	1060.45	1208.77	832.92	820.26	949.55	1391.41	1861.42	2782.76	1892.49	1180.4	1298.72	1453.65	1224.84	2357.75	907.67	1122.73	1274.85	1186.39	1507.98	2194.34	1162.92	1518.57	1207.07	2987.39	1483.37	2378.57	2369.25	1459.3	1031.12	1709.57	2027.11	1656.46	1542.5	2352.58
200944_s_at	HMGN1	1763.6	1728.47	3022.86	1547.25	2014.28	1821.4	1811.13	1045.21	1596.82	1941.54	1864.48	1841.58	1721.98	1337.57	1458.41	1292.15	906.93	1240.33	901.03	1434.53	2153.57	3168.27	2281.08	1220.12	1740.9	1734.66	1382.85	2696.07	930.26	1248.35	1636.27	1177.75	1863.83	2352.4	1145.22	1548.22	1408.63	3067.36	1803.79	2618.92	2601.23	1704.12	1070.73	2044.97	2222.64	2011.41	1621.93	2294.73
200945_s_at	SEC31L1	1713.05	1512.94	1140.15	1912.57	1619.43	982.37	1448.57	1446.75	1308.44	2000.52	2158.24	2382.71	2330.48	1948.6	1343.75	2289.68	1595.23	1738.97	1578.66	2106.87	1728.43	921.58	1408.35	2384.92	1995.43	747.42	2114.96	2753.27	2000.84	1741.32	1349.93	2137.94	2023.15	1802.03	1649.67	1881.79	2280.94	1652.07	1297.42	1607.43	1026.74	2294.14	1272.22	1442.07	1299.7	1605.53	2357.1	1787.87
200947_s_at	GLUD1	631.4	341.96	1122.08	302.72	262.15	678.26	338.87	184.08	179.89	233.08	396.74	514.13	319.91	353.44	505.45	306.81	755.5	192.22	338.23	278.91	474.12	427.86	384.09	165.59	204.09	286.24	239.8	556.44	428.56	454.82	268.25	415.22	715.69	464.34	252.07	333.69	339.51	386.87	204.62	911.95	207.19	291.19	385.04	252.33	224.96	174.41	643.71	528.71
200948_at	MLF2	638.11	646.41	1229.51	1027.69	813.31	2492.1	598.31	1487.02	579.82	925.1	471.92	651.19	1049.79	425.58	799.72	914.92	931.81	569.8	844.54	1408.52	487.12	494.86	344.56	680.9	654.96	316.92	430.13	680.39	278.18	533.31	531.03	464.13	1949.15	404.22	420.72	392.34	835.99	327.23	144.75	573.87	867.47	554.66	372.46	590.85	450.49	431.9	583.89	782.2
200949_x_at	RPS20	4412.74	4214.61	6721.47	5331.79	4798.72	3350.48	2563.06	3290.93	5502.48	3856.56	4198.6	4997.67	4189.53	3705.26	3846.1	4231.44	5216.07	3401.14	1267.55	4008.38	7423.84	4835.13	4428.31	2890.57	2975.86	5567.05	5585.23	4583.67	1440.49	2647.04	6050.26	2601.5	4463.54	3939.86	4104.52	3816.4	4371.64	4911.9	6089.7	8043.28	2753.43	1589.3	4309.49	4242.85	3298.07	8486.43	1997.43	4884.29
200950_at	ARPC1A	1517.77	628.14	1603.16	1119.75	794.55	2085.07	644.86	1171.24	1646.13	786.32	644.21	657.81	864.88	617.08	1213.68	1051.37	1502.24	1236.34	601.38	723.41	1284.1	1262.19	757.44	1694.55	920.88	928.5	991.01	867.77	1416.08	1158.8	1070.74	1862.2	1145.49	837.87	800.43	479.54	1265.42	849.7	336.01	1616.61	726.97	1255.07	875.41	877.53	1366.54	1155.45	729.37	1352.59
200954_at	ATP6V0C	283.37	399.55	357.55	309.17	363.54	711.75	419.74	452.25	265.43	323.27	436.67	407.07	444.5	350.71	636.5	456.23	312.23	259.35	655.72	490.62	308.02	236.23	225.44	384.34	421.91	252.49	231.11	612.45	431.1	462.77	560.79	443.9	551.7	397.68	387.42	277.93	465.41	411.45	197.59	365.46	302.27	499.16	414.28	266.27	251.53	398.44	533.01	526.16
200955_at	IMMT	597.32	561.13	925.22	474.36	999.31	985.39	483.09	633.07	807.88	762.76	654.81	787.46	679.81	424.62	658.4	846.59	609.89	788.87	563.34	584.44	1209.47	621.51	749.34	687.09	526.18	640.88	771.2	729.85	676.02	741.15	699.54	677.1	686.5	566.61	614.71	566.38	958.11	652.72	455.4	761.74	784.17	663.01	488.13	657.09	717.57	513.44	602.98	626.54
200956_s_at	SSRP1	476.12	416.6	452.67	364.36	390.1	522.7	419.6	665.57	520.16	639.27	262.85	478.54	547	210.72	331.79	352.09	514.93	219.93	500.29	317.66	1239.76	532.83	744.75	437.69	264.75	410.31	359.52	233.29	266.39	419.72	224.2	559.46	277.96	335.89	398.02	269.85	401.43	362.22	189.73	212.6	835.07	283.72	301.17	636.33	443.11	393.38	320.56	331.31
200957_s_at	SSRP1	521.63	551.1	552.35	403.7	416.42	598.5	463.79	798.01	561.53	679.28	299.85	604.58	533.69	263.55	358.49	424.07	568.65	327.97	738.24	443.98	1595.51	603.49	797.63	584.57	365.5	445.16	350.04	343.27	335.47	503.21	294.4	718.34	401.96	331.01	479.57	300.09	440.48	379.11	330.79	282.85	1007.99	293.13	346.43	641.69	510.19	396.65	260.95	379.62
200958_s_at	SDCBP	2505.8	1426.89	1091.74	1898.07	2046.53	657.07	1103.58	1143.5	1714.88	2158.76	2588.16	1786.55	1751.94	1805.95	1766.43	1621.9	2117.13	2008.31	1868.39	1541.26	1866	2019.76	1242.57	1048.58	1197.82	1262.39	2121.47	1256.92	1302.48	1290.58	2696.12	1855.54	1403.29	1535.41	1283.67	1593.94	1898.69	1386.2	922.62	2254.31	926.3	1639.43	2429.97	1370.86	426.18	1577.74	1816.59	1293.64
200959_at	FUS	561.63	957.86	696.18	777.03	1021.04	736.97	1096.31	363.85	647.25	611.28	643.32	883	910.75	891.47	870.42	906.22	738.81	646.86	537.98	589.35	931.41	871.46	715.11	653.87	767.64	477.05	809.71	624.28	778.37	897.55	839.43	416.51	567.93	706.94	1119.16	826.81	836.17	842.17	652.25	542.2	1394.1	591.28	873.25	1022.33	602.04	611.84	683.42	779.93
200960_x_at	CLTA	2229.28	1582.72	2183.3	1758.94	3150.07	2150.19	2254.73	1663.57	1993.3	1333.84	1519.33	1688.17	1292.87	1473.34	2670.53	2362.99	2605.25	1629.24	1656.86	2276.79	2234.26	947.69	1878.07	1206.62	1735.32	1287.63	1449.7	2467.56	1712.02	1900.96	2996.24	1543.84	2964.66	1472.75	986.59	1829.17	2135.93	1259.39	1126.44	2244.87	2153.38	1647.82	1664.26	1574.24	1552.55	1784.58	997.7	1274.81
200961_at	SEPHS2	323.43	361.93	392.89	877.74	913.82	804.11	494.81	394.76	306.66	606.89	580.07	663.64	475.28	330.64	388.1	416.24	381.28	466.28	278.05	386.03	328.29	291.21	316.46	460.47	409.48	524.46	500.49	840.27	416.33	449.91	821.57	291.09	476.01	365.93	344.97	344.14	309.24	358.07	521.38	362.41	282.78	350.69	1037.57	310.96	849.69	737.85	1640.65	615.33
200963_x_at	RPL31	5077.15	3285.4	6956.74	3964.92	4710.23	5367.23	2645.1	3111.68	5146.15	3306.35	3537.48	4447.66	2903.67	3314.98	3944.17	2429.66	4145.16	2200.42	1742.61	4207.31	3685.61	3250.52	3430.47	3069.4	2667.95	4807.51	3741.54	3726.18	1845.23	2931.99	4180.94	3383.72	3699.9	3991.76	3592.4	3123.28	3333.75	3685.8	5064.72	6379.59	3336.51	1327.89	7838.69	5605.99	3839.39	6516.36	3572.96	4318.85
200964_at	UBE1	1680.21	2624.74	1404.23	2273.29	2881.82	1796.58	1691.87	1894.75	1756.22	705.28	1641.31	2026.21	1871.87	1570.69	2045.88	2507.44	1812.94	1578.88	4844.54	2498.27	1715.99	1863.71	1822.15	1944.16	2373.35	1310.34	1686.88	1438.03	1636.13	1216.31	1335.53	3445.22	1678.32	1736.87	1769.81	1915.7	2926.14	1827.34	1253.34	1281.2	2459.41	2495.22	1159.27	2490.59	1593.95	2007.46	1112.37	1716.11
200966_x_at	ALDOA	1388.13	3735.97	4096.04	4078.99	4962.84	5755.92	3053.42	4717.83	1926.28	3519.63	2434.03	3560.34	4032.19	2150.88	3546.01	2863.19	3229.41	3724.19	3994.17	3713.68	2435.17	3708.05	2631.77	3944.89	2477.47	3172.64	3895.84	4698.92	3935.54	4190.77	4548.07	4770.57	3036.42	2662.07	4592.83	2806.53	3466.7	4768.04	1602.1	3498.41	4382.09	5337.38	3109.71	2645.99	5865.17	5728.92	9194.49	4764.57
200967_at	PPIB	2035.77	1931.87	1768.16	2084.26	2099.81	3253.77	2131.48	1934.03	1903.62	2350.95	2055.67	1497.87	3054.39	2365.83	2155.74	2015.3	1708.08	1541.35	1829.89	1783.4	1851.51	2305.57	1299.64	1424.14	1988.06	2148.67	2029.18	1784.41	1274.69	2209.43	1314.95	1131.87	2622.42	1846.74	1864.26	2801.93	1926.33	1829.13	1161.61	2223.98	610.83	1623.14	2211.22	1656.04	2210.01	1602.32	1891.17	1520.32
200968_s_at	PPIB	1200.74	1090.34	949.83	1302.35	1281.55	2063.43	1351.9	1017.7	1165.75	1525.05	1082.51	843.68	2045.55	1484.34	1420.2	1342.72	1020.18	937.19	1039.34	1301.16	1258.85	1455.85	773.29	881.02	1238.75	1243.65	1275.42	999.63	817.9	1503.29	827.88	701.06	1634.51	1216.77	1306.14	2062.56	1173.36	1118.99	673.02	1330.99	316.7	875.21	1616.38	1007.76	1367.77	931.51	1113.88	1102.67
200969_at	SERP1	1451.72	460.28	534.27	499.15	598.63	527.37	844.03	740.04	662.33	647.81	644.85	1088.49	913.56	472.71	432.53	725.97	621.66	1463.94	709.54	235.95	1011.75	664.43	504.39	834.55	841.12	1191.47	746.9	1011.85	963.76	1222.37	365.18	412.7	384.93	485.04	267.9	497.7	263.49	872.39	528.7	884.87	467.96	456.05	948.67	917.76	1289.88	856.7	1246.58	956.42
200970_s_at	SERP1	676.84	273.62	269.81	433.06	364	324.55	394.36	450.91	270.27	350.45	338.25	684.77	487.16	258.15	351.92	367.84	434.13	526.41	434.02	205.39	485.07	325.48	254.44	411.13	362.8	528.29	397.3	516.78	513.18	642.39	228.88	306.67	246.68	368.17	224.05	381.58	195.77	472.37	171.65	393.42	282.28	346.5	403.33	400.31	558.6	390.25	518.87	526.76
200971_s_at	SERP1	1705.2	1277.08	989.36	1896.71	1555.7	1670.61	1297.96	1638.22	1290.06	1135.03	1233.46	1596.36	1294.87	1147.87	1443.12	1431.16	1325.52	1223.62	1447.74	1283.79	1228.9	929.02	630.05	798.6	1123.02	1531.69	1388.23	1325.66	1067.88	1834.25	708.52	1032.25	1176.76	876.36	629.97	1626.17	1103.57	1305.15	1406.67	1274.3	1333.63	1243.58	1133.69	1291.29	1730	1156.41	1178.95	1704.86
200972_at	TM4SF8	618.73	406.44	413.56	758.93	476.43	961.36	528.22	616.29	437.73	427.48	671.89	292.12	403.27	622.87	675.65	469.62	567.35	549.52	394.16	879.06	405.19	244.86	345.78	490.68	389.88	450.08	734.37	286.94	655.24	578.97	575.73	518.75	700.51	523.82	508.14	817.16	492.35	551.22	504.81	439.24	502.91	244.78	748.28	328.55	629.28	325.15	657.66	434.79
200974_at	ACTA2	1289.06	3094.42	2305.49	2160.2	645.58	1807.37	1280.4	664.33	2438.53	918.93	2246.35	1186.35	3927.19	6145.77	2679.62	768.32	2334.65	2749.44	1370.07	1193.19	2003.31	1175.19	2992.25	3877.17	3030.19	2458.18	4276.99	4968.21	2924.79	4318.11	2866.21	3120.02	3579.76	5714.65	3707.64	974.08	6747.9	4688.4	520.53	3226.02	788.95	2650.5	1201.01	1325.69	2032.79	3345.91	3845.34	2741.97
200975_at	PPT1	1847.03	934.84	1385.47	855.54	1095.8	1201.95	879.08	1163.56	1375.61	1079.45	1616.56	1261.36	1434.73	989.3	1420.94	1101.63	832.28	1309.62	1676.05	1094.19	1450.22	1265.37	1385.87	912.17	1524.93	992.82	1144.41	977.06	1874.37	1565.64	912.78	1110.7	883.97	1014.42	840.04	1534.45	1101.02	6115.52	528.89	1088.04	956.31	1419.53	2218.44	1397.78	1437.83	1233.91	2480.05	1735.89
200976_s_at	TAX1BP1	461.93	342.02	289.94	515.62	424.71	426.68	356.42	448.11	473.85	263.42	472.3	494.42	460.94	392.02	448.2	611.45	873.99	590.78	205.11	650.87	480.25	350.07	607.44	620.73	676.01	710.63	482.39	504.55	508.49	318.22	828.61	567.97	689.58	425.93	449.47	409.14	383.17	692.29	432.37	512.87	562.75	222.21	1099.62	542.74	372.36	492.97	621.19	755
200977_s_at	TAX1BP1	726.45	480.12	404.74	848.18	555.25	571.9	619.49	595.75	599.69	376.2	686.68	651.7	612.05	510.64	432.36	925.62	1037.55	659.6	336.04	669.26	679.73	485.28	733.4	526.82	591.68	658.4	509.58	554.36	650.77	366.61	1136.28	685.74	929.38	537.37	423.35	744.69	598.74	853.19	423.2	628.99	643.93	317.69	1698.04	1013.08	542.2	439.89	871.99	774.62
200978_at	MDH1	1262.84	571.95	1241.78	1024.13	1693.24	1238.95	572.57	891.97	1029.62	611.67	800.36	604.2	821.78	390.6	1018.73	845.98	588.14	1112.26	584.9	871.17	1317.4	611.98	544.99	662.06	373.61	871.66	669.98	775.63	636.71	1047.78	881.73	884.33	889.92	560.51	615.09	1384.76	888.99	684.8	281.6	1588.56	681.84	680.17	1067	900.33	910.82	686.25	639.29	634.06
200980_s_at	PDHA1	468.56	710.43	860.09	824.5	662.35	599.83	706.57	358.25	626.61	634.21	400.11	479.55	353.53	275.33	424.3	616.49	938.77	498.46	477.09	465.19	352.51	900.03	278.72	436.86	681.62	491.7	498.48	372.14	266.26	444.08	575.91	590.74	460.63	331.41	383.47	502.05	580.56	329.02	227.43	481.38	735.4	1120.31	298.13	344.13	426.19	257.65	272.62	454.34
200981_x_at	GNAS	7406.25	7384.46	6268.44	6714.95	6983.98	4492.09	4943.06	7966.29	2812.23	5150.74	4783.32	5937.14	5701.17	4380.16	5697.4	4789.36	6787.37	5088.54	8348.96	5446.18	4078.79	4310.15	6534.73	5066.48	6979.87	6062.4	6154.85	5522.73	5737.17	4755.56	12193.2	8319.01	7694.85	6230.25	6865.7	5525.99	5141.99	5187.32	3652.87	6018.47	8207.11	4757.68	4624.44	4600.22	5450.5	4396.89	9621.89	7652.44
200982_s_at	ANXA6	540.89	520.83	308.89	425.25	530.11	391.91	667.4	150.27	385.22	262.97	611.46	376.96	611.64	778.04	608.24	582.62	543.01	397.14	553.19	1161.5	683.34	455.94	433.41	430.95	585.61	367.13	341.55	677.65	308.2	1145.45	453.77	547	469.8	796.86	748.55	1146.47	931.1	735.96	674.45	508.22	281.65	450.19	573.23	300.63	171.29	420.03	649.25	411.98
200983_x_at	CD59	988.39	958.63	2029.67	1515.99	1194.06	1450.19	611	493.87	528.28	1016.29	1532.17	1925.32	1791.39	1217.64	1593.74	784.44	1207.06	1575.62	1318.07	1959.49	520.37	830.1	1317.39	369.49	1893.71	2272.32	837.57	959.89	441.86	1491.27	1298.11	1928.76	2479.74	1216.19	910.71	5136.22	908.08	1661.65	120.04	1019.4	246.19	1501.63	735.24	3891.29	928.46	911.88	998.3	2784.96
200984_s_at	CD59	965.54	799.58	1444.51	1212.82	839.26	974.74	641.4	496.75	455.4	707.97	1377.18	2240.64	1535.01	1237.12	1271.57	649.48	996.52	1524.39	1226.35	1588.5	419.32	730.81	1312.04	404.85	1871.05	2100.72	649.27	861.48	420.18	1250.54	785.19	2031.89	1534.08	1075.18	917.1	4485.14	715.79	1509.2	158.41	756.69	292.11	1660.23	496.07	2826.72	690.54	820.74	792.84	2094.52
200985_s_at	CD59	1205.77	1098.75	1613.31	1446.97	768.73	885.42	913.79	486.3	585.62	817.58	1898.55	2794.64	1970.97	1678.12	1169.62	783.11	1038.85	2096.05	1650.78	1664.62	588.85	876.8	1492.21	581.8	2497.91	2768.25	913.43	1212.82	609.2	1612.08	1131.74	2715.65	1914.73	1470.53	1106.69	4738.18	866.04	2092.08	243.14	861.1	305.21	2001.1	701.91	3014.85	861.95	1010.95	1050.02	2080.07
200986_at	SERPING1	822.09	1282.13	422.29	918.75	1033.94	322.39	1158.91	485.05	1101.65	364.23	2077.39	628	850.17	1271.82	1942.57	815.23	871.49	1012.15	846.96	1104.04	638.5	629.37	862.14	929.56	915.59	733.83	765.44	672.99	568.22	1145.42	385.15	1002.8	793.25	1806.24	785.9	765	1846.89	740.12	216.34	767.12	456.18	1074.33	944.83	967.1	308.51	337.98	670.31	530.54
200989_at	HIF1A	1169.79	1071.08	796.78	2701.36	1134.86	2619.9	992.38	700.93	1472.25	1337	2044.75	992.5	1254.1	2273.89	1152.34	1061.56	1236.29	1507.88	1285.65	1176.21	1383.44	1386.69	1093.52	1209.88	935.09	1079.98	2347.73	1015.28	1577.85	1088.11	1541.58	1266.84	1054.13	1214.8	1245.57	1734.56	1118.41	1225.1	997.16	1476.03	1409.44	2632.37	1860.93	999.43	812.32	1405.18	1561.94	1412.4
200990_at	TRIM28	859.85	995.69	1130.07	1069.8	1332.36	1203.75	1214.64	1769.62	1010.87	530.44	540.17	687.84	678.89	749.75	705.45	1712.83	917.73	1070.35	968.02	757.68	1397.65	1096.29	619.63	731.22	943.02	870.13	626.57	675.22	929.48	1212.13	865.02	998.48	564.45	759.92	1038.87	534.47	614.77	480.42	539.66	843.84	3329.4	659.5	508.93	533.64	707.4	532.74	583.9	722.79
200991_s_at	SNX17	853.12	502.74	413.53	510	620.3	572.29	391.52	911.63	634.86	490.58	514.77	958.18	759.27	527.69	612.13	523.72	426.62	561.39	583.86	532	427.25	361.74	336.79	545.25	382.77	760.84	593.55	654.82	584.41	427.62	530.41	712.62	630.08	578.64	596.89	529.81	734.91	536.74	536.4	473.66	499.69	524.11	603.21	312.58	624.85	595.12	530.06	504.84
200992_at	IPO7	927.67	674.21	693.48	726.42	500.12	949.84	590.55	1450.2	1088.28	1858.69	591.37	553.28	858.17	578.44	586.51	969.76	1115.24	674.62	586.08	1308.47	1204.86	1181.42	1344.46	818.72	1283.84	1486.7	933.01	550.3	814.13	925.37	625.33	1633.05	550.12	447.48	723.45	637.39	639.71	622.91	450.67	561.45	1607.69	1219.93	957.49	771.53	561.47	1055.22	792.51	863.65
200993_at	IPO7	937.11	654.54	575.73	519.5	335.79	620.3	583.34	1574.98	1039.3	1827.19	424.9	527.34	706.34	483	551.39	774.8	853.9	727.59	480	1008.14	1143.45	1095.43	1614.57	882	1254.28	1731.6	891.39	453.97	596.59	742.83	479.49	1441.07	591.66	387.95	506.07	483.79	619.17	554.54	588.26	512.74	1203.31	1033.56	749.67	524.28	602.39	1057.49	702.38	611.7
200994_at	IPO7	634.61	386.06	408.33	339.07	174.11	475.74	372.52	702.84	368.52	825.89	322.58	291.45	402.24	274.47	317.77	563.88	507.59	338.57	308.77	505.64	820.23	745.28	609.85	416.69	476.52	774.57	324.97	299.78	463.07	486.76	334.82	773.72	367.54	228.13	294.24	265.82	293.37	323.27	218.48	356.31	544.19	613.72	621.61	404.94	295.36	536.6	522.04	418.96
200996_at	ACTR3	1723.89	1195.71	1725.03	2090.8	1858.18	3133.43	1294.24	1319.98	1376.69	1540.84	2520.8	974.85	1450.28	1117.49	1689.15	1271.55	1506.6	2061.11	1368.77	1049.47	1235.96	1603.48	1413.21	1361.76	1273.07	1739.67	2980.44	1943.54	2093.07	1752.44	1560.17	1255.12	933.17	1061.95	1213.69	1285.01	1291.56	1284.92	1989.65	2329.74	1001.73	1745.01	1870.8	1914.33	878.37	1406.46	1997.54	1722.65
200997_at	RBM4	480.28	651.52	590.63	651.59	703	778.13	735.16	631.95	655.95	545.63	635.32	691.85	614.07	551.15	468.72	612.19	590.61	511.29	458.14	576.79	519.46	440.21	803.24	1057.41	656.77	594.63	591.61	605.82	676.94	551.72	517.86	621.52	611.85	562.75	806.15	512.1	504.03	565.79	462.94	412.34	775.85	617.95	771.35	1131.98	911.6	715.19	616.41	1004.37
200999_s_at	CKAP4	1407.27	886.36	521.83	938.83	1060.01	1317.07	712.87	832.35	958.84	1314.13	996	1869.43	1216.63	1126.33	838.15	1210.62	1015.93	1616.97	1241.13	1175.42	843.22	832.13	758.52	1118.58	745.16	1122.32	803.79	1403.74	765.1	1042.2	925.5	687	1042.29	676.71	1799.59	551.58	770.25	807.35	155.21	686.48	777.83	1521.25	755.81	603.43	1279.46	1235.05	1202.62	966.05
201000_at	AARS	325.42	466.17	821.6	502.11	803.27	427.75	514.95	656.93	838.15	457.11	419.81	675.72	687.66	367.45	560.13	581.52	674.83	514.04	914.5	997.3	540.53	257.07	535.98	404.29	677.02	534.19	442.71	585.93	624.25	891.54	413.65	534.87	558.22	446.1	414.18	341.53	679.36	480.99	570.78	305.66	361.7	826.58	270.04	359.69	528.1	400.72	370.22	591.2
201001_s_at	UBE2V1	527.39	480.58	844.11	421.77	509.83	911.22	254.84	424.18	354.23	545.7	433.5	243.31	282.1	376.47	353.98	352.47	491.63	177.73	524.48	362.96	215.14	312.61	378.16	1540.07	422.81	304.91	671.69	517.89	569.9	299.07	435.9	309.31	382.28	376.26	364.42	481.24	350.41	312.02	386.78	774.64	495.58	548.5	473.61	339.26	275.28	347.4	1000.18	582.22
201002_s_at	UBE2V1	808.33	1123.13	1417.22	509.95	866.91	1134.04	559.59	667.66	427.7	550	709.01	619.55	493.24	795.09	896.58	636.84	739.82	296.36	874.83	447.35	615.59	480.19	853.82	3048.28	715.82	588.52	951.78	785.79	1113.99	507.48	783.87	722.28	798.86	714.22	634.3	606.65	648.96	686.82	791.49	1101.97	972.89	999.67	659.46	303.14	299.32	733.19	1141.9	923.47
201003_x_at	Kua-UEV	811.47	595.5	647.33	671.65	1205.26	634.2	439.57	620.36	464.17	526.51	464.26	482.63	362.01	445.48	634.03	728.67	625	740.57	635.84	355.8	445.3	495.79	312.01	718.02	593.19	547.29	536.2	515.18	645.3	404.77	535.34	332.12	880.19	701.59	719.98	755.52	687.51	515.14	314.79	672.89	623.07	490.64	786	289.41	610.87	636.07	556.18	552.79
201004_at	SSR4	1316.12	1599.98	2030.02	2003.2	1363.68	1853.44	1809.51	1356.1	1716.08	2843.46	1384.2	1680.17	493.06	2112.94	2171.82	2092.83	1879.54	1177.76	902.11	1756.96	2140.78	834.88	884.46	816.4	1077.06	1556.75	1706.75	2179.27	1173.93	2070.89	1477.44	1054.38	3555.66	1128.63	1062.56	1764.15	1178.81	1319.94	2023.56	1870.13	792.22	624.34	1517.97	2698.98	3205.97	1875.95	2720.27	1704.02
201007_at	HADHB	1073.8	802.53	730.66	589.27	685.17	947.75	586.28	643.06	554.91	581.61	827.69	526.99	1009.65	722.98	920.69	612.45	693.52	718	859.48	656.28	810.81	455.85	563.03	910.55	532.9	956.75	734.37	752.07	667.26	654.88	940.62	897.47	1358.65	803.01	721.49	606.14	785.27	680.84	444.54	729.94	390.07	638.86	922.49	604.95	752.69	725.28	810.89	890.01
201009_s_at	TXNIP	1920.23	1405.1	753.25	1284.58	781.84	239.66	1591.28	727.99	2223.15	1021.62	2582.2	1092.86	1567.52	2305.59	2127.24	1397.2	635.07	1674.4	1989.06	991.79	825.96	597.2	3664.68	976.44	2374.29	2259.54	2060.3	1029.09	1166.63	1641.26	810.05	1205.74	1053.12	3497.2	1737.2	1724.34	1600.9	2072.08	3484.6	729.39	1784.05	1337.24	1442.7	1334.01	2230.35	1161.46	1614.65	2087.63
201010_s_at	TXNIP	2991.77	2211.14	1396.78	2119.79	1364.68	486.06	2725.73	746.47	2375.82	1094.58	3778.03	1749.75	2756.46	3492.35	3290.34	2241.96	1043.34	1870.01	2807.85	1686.04	1588.51	987.85	4149.66	1045.44	2056.55	2250.82	2402.78	2092.4	2030.17	2689.25	1373.3	1797.72	1846.87	4460.85	2702.97	2692.92	2333.81	3180.69	2937.45	1226.5	2820.56	1923.22	2221.52	2400.07	2480.97	1368.09	2237.84	3032.62
201011_at	RPN1	968.31	904.87	820.42	775.85	1298.29	2021.96	1037.5	1307.94	746.02	875.75	951.48	888.51	1150.6	814.95	1012.86	1358.76	1124.98	817.27	718.76	715.67	1060.1	1484.84	744.32	542.76	813.48	892.63	802.28	925.42	654.98	1146.21	827.5	1047.78	781.05	708.08	1047.49	937.1	812.6	1335.66	588.58	1194.22	967.27	1058.95	860.6	993.3	928.51	676.98	1004.39	1110.13
201013_s_at	PAICS	912.12	515.27	1024.15	648.48	1082.99	778.72	801.66	1314.34	686.98	1343.19	459.19	956.36	742.6	257.21	457.99	664.03	669.61	527.68	1085.85	657.11	912.85	759.98	489.08	572.54	752.42	997.12	909.83	550.58	631.96	1060.37	739.19	1039.58	651.75	636.24	710.92	726.42	775.58	311.68	374.69	856.65	774.74	893.57	821.44	542.16	1252.52	878.98	682.15	921.39
201015_s_at	JUP	607.24	453.49	587.04	1604.14	562.78	1457.64	330.03	776.98	324.55	230.89	287	566.11	389.04	343.5	632.27	593.87	458.56	390.42	726.07	429.39	746.82	993.61	572.92	463.64	527.93	595.08	837.01	581.56	547.72	259.81	656.71	2117.43	809.1	779.43	615.42	447.96	1194.8	1057.53	313.81	654.63	613.96	883.57	634.49	1222.85	357.54	437.87	531.41	1012.49
201019_s_at	EIF1AX	887.55	775.22	782.85	756.57	1014.84	804.98	646.27	915.56	947.05	1543.89	777	1002.15	400.3	456.22	296.99	614.85	692.32	785.22	382.25	497	519.9	752.74	750.93	1105.03	1073.12	1311.79	861.81	435.03	385.8	493.94	650.29	729.49	467.58	495.34	373.13	721.9	427.9	384.56	607.07	581.9	1139.1	1232.94	532.94	1019.31	1945.01	1355.31	483.83	413.33
201020_at	YWHAH	686.41	363.98	578.49	430.65	549.62	294.95	540.75	486.21	721.09	485.49	582.69	552.47	786.3	356.99	638.86	613.44	437.13	642.07	631.71	573.79	473.72	515.45	703.86	636.97	477.34	465.31	405.85	531.58	364.37	534.89	554.52	743.39	634.78	446.96	336.04	711.67	682.01	716.78	165.88	913.29	313.59	870.03	402.94	376.45	376.09	380.7	457.96	346.73
201021_s_at	DSTN	1050.37	1546.9	2307.2	1549.14	1320.56	2580.48	823.66	1301.93	769.26	1175.49	1659.43	837.04	1651.23	1485.31	1499.88	738.74	1784.81	1356.05	888.72	994.26	1147.95	1036.89	1107	758.7	1018.07	1628.75	1441.27	1745.82	1557.23	1498.56	1338.38	1531.88	1874.98	1561.97	766.01	1603.49	1532.16	2472.12	187.77	2513.62	1221.28	2619.37	1908.99	1344.05	1787.16	1901.49	2083.63	2676.01
201022_s_at	DSTN	1500.84	2214.33	3139.86	2334.19	1658.93	3078.77	1368.49	1970.87	1369.74	1806.07	2324.16	1182.93	2329.64	2184.64	1558.75	1117.36	2373.17	2563.43	1373.04	1439.56	2002.92	1602.19	2223.01	1523.71	1861.74	2723.31	2116.63	2873.51	2258.24	2137.12	2260.57	2419.67	2835.17	2824.97	1602.28	2346.54	2164.63	3690.36	476.64	3882.83	1549.32	4201.03	2521.5	2080.3	2700.48	3114.05	2860	3762.6
201023_at	TAF7	483.31	386.7	437.3	530.16	530.22	486.2	444.54	293.02	343.64	330.49	549.37	336.55	339.34	487.64	735.39	343.15	446.47	430.3	425.36	564.61	314.78	553.97	351.35	244.63	346.12	324.02	625.02	455.8	361.57	451.65	723.32	310.45	368.31	477.2	498.9	488.41	402.65	357.25	423.17	419.99	436.72	278.8	424.26	354.82	237.59	567.05	686.49	336.97
201024_x_at	EIF5B	548.52	698.93	812.03	566.98	713.36	1209.4	688.38	603.37	795.85	1217.81	558.1	348.36	571.93	429.89	355.03	551.43	705.73	867.03	489.35	448.1	645.93	468.91	741.2	743.77	929.32	954.13	1092.48	503.63	528.73	508.68	393.65	547.76	365.24	590.83	310.38	231.95	455.03	385.84	916.03	603.18	598.1	791.7	506.45	651.7	505.74	553.63	341.04	396.3
201027_s_at	EIF5B	413.81	344.56	575.1	367.27	390.14	776.1	350.93	336.03	513.7	742.06	329.39	227.82	349.81	199.06	223.54	333.38	472.88	402.7	404.37	529.45	339.86	290.92	410.66	419.17	423.32	563.51	682.47	371.03	351.53	360.19	358.67	336.32	276.74	303.47	281.28	157.72	325.57	234.49	335.15	573.3	352.79	381.91	336.23	489.46	285.63	371.56	298	410.82
201028_s_at	CD99	522.2	698.89	364.39	638.3	914.97	506.42	309.65	1236.1	449.2	318.65	858.94	484.87	836.18	986.46	644.49	518.89	514.49	577.46	297.23	437.89	410.13	544.36	421.45	811.68	801.45	511.67	1125.42	1071.19	560.85	588.69	673.43	1321.06	914.61	1126.93	1076.1	1817.66	1247.26	857.27	298.07	684.15	348.72	1465.7	617.73	273.32	398.07	980.19	918.97	602.8
201029_s_at	CD99	1400.75	2471.64	1157.13	1864.95	2361.42	1493.49	1165.64	3320.58	1392.28	924.96	2717.09	1806.13	2304.51	2847.83	1966.66	1351.15	1483.78	2063.78	995.81	1319.26	1518.59	1515.9	1451.82	2382.14	2726.46	1674.24	2905.06	3284.67	1910.12	1658.94	2130.2	4254.78	2711.51	3147.16	2744.55	4510.38	3504.45	2395.57	1611.98	2133.07	1319.29	4368.84	1624.02	882.63	1145.32	2686.68	2380.45	1418.5
201030_x_at	LDHB	2420.49	3001.14	3550.58	3378.68	3828.18	10211.9	2419.62	5689.89	3915.87	7567.83	2781.22	2037.11	3827.91	1915.43	2247.97	2981.55	6359.31	2091.86	1407.74	6512.5	5398.8	3398.98	3302.84	3108.51	2017.01	2024.41	1108.76	702.95	2386.4	3546.14	1955.88	688.48	2008.79	1903.78	3093.58	1343.29	2549.22	1027.54	1921.55	3624.66	3934.98	1275.42	2237.56	3140.28	1801.43	2036.16	1452.44	1464.36
201031_s_at	HNRPH1	1121.41	1681.45	1365.55	1265.24	1438.25	1104.12	1490.66	876.65	932.38	704.74	1191.9	1497.27	1449.98	2022.74	1295.38	1365.73	841.06	635.23	984.81	623.09	1500.38	1665.77	951.41	617.74	534.15	757.47	737.4	986.95	1322.47	1108.29	935.57	1194.82	926.47	1584.57	1369.34	1317.15	1300.78	1229.89	968.95	879.16	1532.9	1257.02	1497.83	978.11	987.24	945.7	1199.77	622.75
201032_at	BLCAP	255.98	463.72	575.35	351.24	360.98	734.18	396.79	312.35	264.58	147.82	494.22	255.85	210.85	430.61	442.1	403.63	325.66	337.45	328.3	523.04	303.82	266.61	374.41	628.03	396.89	385.45	284.74	404.43	264.95	345.56	591.07	411.04	392.34	482.55	469.24	413.04	320.39	436.85	411.05	578.11	747.79	399.14	355.44	265.89	203.15	167.87	597.89	499.52
201033_x_at	RPLP0	8037.63	6127.48	8205.34	7511	5750.52	7812.75	5324.23	7958.64	6779.6	7524.52	4304.48	6036.19	6783.39	6644.17	7002.52	5906.12	9032.06	3652.93	4857.13	6617.29	7578.81	6030.87	5639.83	7371.08	5594.5	7683.82	6369.33	6226.16	4791.12	6346.01	5711.93	7111.65	6916.81	5824.14	5730.52	4272.67	6492.43	6405.01	5316.26	6753.81	7655.81	3698.32	5881.38	5360.61	8289.33	8604.36	7533.93	6973.59
201034_at	HADHSC	1385.76	653.28	298.33	694.1	447.78	649.67	789.74	751.74	450.94	425.75	1231.48	688.68	709.19	1353.68	685.96	513.42	643.88	658.69	357.93	803.64	671.79	1157.8	684.52	576.7	713.87	368.06	699.26	1104.34	2103.09	664.41	261.9	253.68	458.11	1352.03	703.52	550.05	523.92	337.09	1241.59	516.35	604.96	427.8	851.42	684.45	182.35	211.38	992.95	1264.98
201035_s_at	HADHSC	204.66	179.54	229.01	273.36	359.78	180.01	101.77	114.72	175.34	155.1	133.77	143.74	125.88	148.85	141.23	232.43	185.04	180.06	215.89	236.03	150.43	227.36	121.25	168.3	239.46	215.84	243.7	201.47	129.92	224.73	230.78	241.03	162.73	159.55	238.28	184.09	233.25	277.57	117.39	203.08	226.16	177.75	215.69	273.25	191.02	157.46	267.34	197.21
201036_s_at	HADHSC	246.33	203.72	263.65	350.48	360.59	223.82	234.66	193.8	175.53	231.82	187.52	266.26	139.04	163.86	195.63	307.96	218.78	284.02	255.13	165.27	275.68	302.36	128.84	162.63	306.77	310.22	302.76	288.75	217.88	343.17	318.66	337.6	233.74	197.2	271.93	204.28	257.41	363.35	239.19	252.23	283.36	232.3	233.2	371.44	260.57	258.9	255.71	275.29
201040_at	GNAI2	503.89	599.01	367.46	720.81	524.9	423.99	694.33	353.98	428.13	340.81	691.78	612.89	548.9	852.75	1016.42	553.63	487.44	382.38	869.78	795.65	408.86	488.93	314.24	532.46	418.09	383.28	303.79	537.68	389.47	615.92	480.8	480.81	569.69	586.21	593.54	586.83	811.52	632.5	454.18	445.9	633.74	679.18	393.71	338.54	367.7	279.13	454.7	595.9
201041_s_at	DUSP1	669.44	2204.44	526.38	704.4	582.02	813.2	1015.7	438.12	710.45	467.31	1538.52	595.81	1498.71	929.14	885.55	1047.28	939.73	757.47	920.01	1361.49	473.07	605.02	934.24	1052.83	740.43	227.73	1145.04	638.52	446.4	532.21	516.23	1578.88	827.14	3814.4	717.26	993.64	1275.99	2328.17	513.68	1896.1	532.4	448.14	603.26	1173.67	314.02	629.61	1407.45	1329.3
201046_s_at	RAD23A	1060.46	946.75	2560.05	846.13	999.62	820.99	977.61	1604.08	1117.19	852.8	655.56	1265.91	1242.27	845.9	946.24	1228.71	1717.35	1357.67	1149.7	682.5	1151.39	687.27	713	2117.63	1459.99	741.35	1076.59	1077.37	738.41	1021.99	676.24	958.35	1492.14	714.3	740.19	1071.43	1002.48	972.89	883.52	801.14	1725.89	804.65	640.72	1673.7	899.57	755.54	664.91	724.29
201047_x_at	RAB6A	532.14	773.04	767.58	847.17	451.49	943.69	534.11	651.24	401.67	634.2	867.53	683.62	1140.64	603.76	597.11	727.6	1026.93	688.72	700.07	2123.77	451.32	904.67	816.3	976.88	537.92	721.62	962.81	960.36	1090.53	714.54	924.22	963.94	1108.05	689.5	630.88	746.41	1005.57	668.77	471.28	698.93	1100.93	2142.99	877.91	1005.45	1081.37	737.21	1064.63	1016.54
201049_s_at	RPS18	9180.24	6868.35	11588.7	5739.74	7272.25	8412.51	6590.11	6508.01	6516.69	5567.74	5375.06	9608.33	7175.13	6655.31	6399.45	7641.03	9245.39	3911.93	5032.4	7839.72	8551.19	11851.3	7511.1	5576.1	7152.05	8505.86	3442.96	7059.48	4896.58	5653.07	6931.38	6045.96	8701.86	5278.35	5003.92	5681.31	8007.77	6325.09	7898.4	8701.73	6151.6	3945.32	7124.95	7947.16	10171.1	9754.73	4664.41	6804.56
201051_at	ANP32A	864.86	847.38	502.47	820.11	659.07	651.66	638.31	1637.02	1143.22	546.18	659.6	639.09	953.86	591.96	888.87	642.84	463.16	686.72	558.43	397.96	864.89	724.02	735.33	703.56	878.49	511.85	893.67	427.84	642.07	808.28	582.57	488.15	515.38	769.13	1184.05	711.1	518.55	677.86	1032.19	564.03	803.8	435.52	693.22	535.22	393.73	508.8	499.03	532.28
201052_s_at	PSMF1	290.25	372.32	610.52	384.66	574.62	551.83	374.36	377.55	354.24	310.62	625.99	362.39	415.33	287.65	493.8	472.19	561.81	298.06	433.17	273.51	363.2	345.29	265.96	474.11	412.47	309.62	633.31	327.08	424.87	485.04	371.01	351.67	400.54	337.78	273.4	300.78	388.67	331.52	269.7	282.81	588.34	430.7	468.22	448.64	452.03	373.73	367.35	519.75
201054_at	HNRPA0	758.87	705.89	1040.93	695.64	397.24	777.6	718.42	419.89	722.33	525.54	823.83	633.06	864.86	743.05	658.58	754.25	483.58	964.33	615.96	394.8	801.96	1191.91	967.89	1246.4	694.77	525.06	662.23	697.13	1026.62	520.63	985.61	581.93	698.93	985.1	1325.71	542.11	481.02	814.32	484.81	739.37	1320.76	1028.22	812.65	744.84	665.6	1090.17	1136.92	550.94
201055_s_at	HNRPA0	177.21	312.48	257.5	329.83	329.18	340.68	299.6	139.89	145.47	197.87	231.97	262.16	275.1	261.82	205.08	310.96	230.03	223.55	253.88	285.39	253.5	230.99	218.13	235.06	287.25	213.56	221.16	202.83	301.03	230.85	402.21	256.05	233.6	215.64	421.45	281.35	269.77	266.08	216.35	173.55	418.51	198.1	256.7	329.84	189.21	319.76	227.7	220.7
201057_s_at	GOLGB1	406.4	410.28	305.48	431.2	609.72	402.84	485.29	620.69	488.79	271.93	543.98	380.36	627.93	525.44	525.21	669.93	445.1	507.83	209.56	464.57	353.88	436.37	411.69	361.07	506.79	489.68	488.16	519.68	671.02	376.23	291.68	638.36	382.97	534.74	605.52	303.43	370.09	907.18	355.51	350.85	600.98	398.95	527.72	716.3	617	596.12	418.66	708.98
201059_at	EMS1	414.5	702.74	878.39	490.13	458.23	816.58	685.93	640.69	402.51	598.73	497.15	792.61	854.19	641.29	732.84	525.53	757.33	550.04	713.67	738.78	464.93	513.27	745.57	681.02	540	848.4	759.79	832.66	1056.89	585.5	583.89	1543.44	1067.92	680.42	572.61	534.37	1231.78	733.38	180.28	582.51	427.31	1135.81	760.38	857.07	588.79	853.21	791.67	577.93
201060_x_at	STOM	587.57	414.83	684.02	594.83	489.35	737.92	606.28	235.62	512.14	406.93	1101.8	423.34	413.64	722.09	899.1	462.16	646	500.72	809	619.21	681.15	426.07	680.34	720.57	565.46	259.6	661.57	636.99	758.26	661.05	437.05	601.61	793.29	929.69	284.46	727.18	793.77	1016.69	105.01	860.79	510.5	783.22	1498.33	332.14	840.05	352.44	554.51	815
201061_s_at	STOM	766.72	616.18	728.54	694.07	597.78	669.48	733.87	373.83	691.53	436.4	1312.17	559.81	460.88	1161.62	1055.96	597.77	646.77	785.52	490.86	668.69	1117.11	475.74	934.79	1080.88	714.77	411.13	876.3	913.92	834.37	858.48	438.06	751.42	999.23	1378.06	427.75	1086.33	930.93	1367.64	269.22	1250.39	413.33	791.66	1607.99	383.78	1105.51	609.49	711.49	1011.42
201064_s_at	PABPC4	964.2	676.01	1597.53	544.48	606.1	694.03	667.67	942.58	1221.28	892.33	498.84	727.52	914.04	623.91	687.25	882.59	1067.27	619.04	680.38	1146.43	909.97	541.55	1008.37	843.12	1601.72	632.39	468.93	680.27	766.16	651.74	351.67	864.07	593.31	511.03	523.93	367.79	498.28	828.79	615.35	553.72	734.15	851.87	618.97	608.23	601.51	817.26	688.13	640.52
201065_s_at	GTF2IP1	870.27	635.92	805.03	820.73	633.55	738.84	627.74	933	809.9	861.22	755.86	761.85	870.52	764.96	1043.14	972.42	1002.83	1230.4	601.75	567.4	710.08	795.76	895.52	1449.16	1164.68	797.4	634.47	662.63	1055.03	782.37	847.95	979.83	1290.12	1093.3	1127	1011.69	713.2	682.7	765.93	1042.76	924.98	972.3	975.55	1139.69	773.89	683.94	615.07	925.45
201066_at	CYC1	638.21	1034.7	1532.42	531.03	954.23	730.1	589.26	408.11	1138.22	921.85	477.01	651.1	798.06	323.94	565.24	1186.01	1067.18	618.87	1454.81	649.77	677.78	1094.1	596.5	665.91	398.02	410.86	360.9	345.09	367.96	852.87	1552	522.7	634.57	405.95	469.81	438.39	565.44	748.25	249.97	1395.62	1052.36	531.13	411.64	526.09	1787.72	229.85	628.72	571.12
201068_s_at	PSMC2	1540.66	572.11	1105.62	1363.26	897.55	936.71	773.82	827.96	1080.22	1191.08	1253.39	802.24	765.16	572.75	793.5	1096.65	1116.1	1001.04	531.18	872.84	958.63	721.32	877.77	994.44	896.61	1047.36	729.21	656.51	580.36	892.86	928.04	1015.38	939.22	638.61	880.22	1021.98	863.84	650.9	542.3	1251.87	303.29	536.42	988.74	1345.63	1521.27	788.74	651.96	863.35
201071_x_at	SF3B1	1294.57	1572.01	892.65	1958.55	1598.65	968.76	1978.67	1607.05	1338.61	1472.76	2117.32	2695	1642.83	2099.99	1292.78	1598.02	1354.69	1722.46	1926.45	1374.17	1686.74	1207.12	1367.92	1282.5	1529.34	1617.49	1122.58	1257.54	1928.54	1792.58	1407.1	1459.33	1434.01	1706.1	1789.82	1183.39	1231.98	1410.88	1430.89	1127.56	1979.49	1987.54	1869.51	1786.46	1266.32	1248.58	1718.95	1881.19
201074_at	SMARCC1	327.21	474.22	679.15	269.9	479.34	613.87	442.57	582.6	415.13	450.36	252.63	399.39	336	238.07	394.7	494.12	521.23	580.17	496.54	483.38	1155.03	881.79	931.83	991.78	432.93	365.02	363.13	331.31	559.64	310.44	448.96	555.67	342.55	316.27	424.03	201.95	446.38	569.09	360.38	489.41	482.26	376.69	338.82	576.66	461.4	299.06	265.25	284.23
201076_at	NHP2L1	336.03	256.89	402.99	176.39	240.08	218.41	209.07	226.78	340.01	345.12	203.83	221.13	192.29	204.08	242.64	349.32	219.18	307.47	219.12	221.07	271.71	269.13	235.04	237.37	237.72	249.14	207.29	235.29	175.35	191.72	260.86	185.28	239.33	225.73	148.55	288.77	169.43	218.46	261.03	415.37	190.46	187.18	160.27	184.84	278.13	172.47	147.82	274.39
201077_s_at	NHP2L1	1253.41	1040.64	1656.28	756.6	1396.62	866.71	773.37	778.16	1618.23	1779.66	855.45	760	814.2	683.74	1019.38	1495.58	1413.48	885.81	1294.48	1166.63	767.63	883.26	801.55	829.59	1013.68	1257.27	1164.85	885.83	640.74	808.28	884.24	611.33	814.75	664.99	404.67	921.39	1051.37	756.15	679.37	1804.26	748.94	829.32	880	1017.49	1500.01	474.71	622.74	1089.11
201078_at	TM9SF2	1387.89	903.81	693.67	1070.62	745.4	897.82	559.18	1061.47	1031.88	761.37	1736.05	1352.42	1034.68	977.2	1317.01	1318.15	1073.23	823.8	2666.04	779.31	915.02	1106.92	995.36	1496.23	807.77	1033.75	857.19	1975.26	1433.94	1421.77	1074.89	1890.36	1883.15	1282.33	1037.74	1471.78	1013.71	1565.64	632.39	1243.08	314.45	2600.62	1182.48	1722.11	989.94	1138.8	1871.07	1064.88
201079_at	SYNGR2	853.14	543.57	450.09	732.34	830.93	1076.53	648.79	908.84	639.73	817.51	643.91	552.65	725.7	472.3	835.71	1236.22	689.98	664.6	1107.8	968.38	381.8	352.71	489.11	356.06	952.89	562.64	750.82	918.43	1085.74	857.95	1131.95	802.04	501.28	677.74	547.96	1317.84	828.35	461.13	320.16	557.75	282.34	660.5	1152.07	726.41	709.95	751.95	2874.18	716.84
201080_at	PIP5K2B	166.49	237.08	143.44	201.31	192.66	154.18	215.68	161.8	141.47	164.07	139.94	147.81	159.82	230.49	221.87	162.7	122.28	129	136.87	214.25	221.96	357.56	316.34	178.66	194.69	283.13	180.14	1235.44	863.1	117.71	253.53	1268.28	173.98	562.75	269.65	217.89	290.09	237.19	185.76	135.98	164.1	171.55	337.11	478.46	209.91	316.14	261.23	234.95
201084_s_at	BCLAF1	1042.53	933.92	1050.91	1575.45	861.68	928.42	1026.31	968.48	860.5	912.31	1129.35	1047.26	1171.51	975.73	914.89	969.24	924.98	750.98	703.99	898.05	1317.28	1615.29	1096.35	1076.37	829.93	1262.98	812.35	1214.13	1592.34	917.88	1057.23	1027.11	898.88	1678.59	1245.97	996.09	926.78	950.71	711.51	1045.79	1435.7	933.34	1497	1307.08	874.19	915.42	1177.34	989.92
201086_x_at	SON	748.16	755.34	641.59	757.27	784.46	640.86	879.98	591.2	693.64	653.99	1357.58	659.2	881.69	1170.13	891.32	952.57	471.88	535.78	515.75	657.52	1059.22	1058.9	1052.61	736.86	1067.66	733.15	746.82	1431.22	857.05	786.72	834.07	1146.71	806.1	1113.3	727.73	894.26	933.98	1334.72	980.1	970.29	991.78	969.17	874.84	877.39	792.08	768.42	1122.55	1037.81
201088_at	KPNA2	944.72	1617.91	1038.95	2282.53	1985.04	1527.3	1274.64	1836.6	1625.37	2439.96	1300.56	789.15	2044.94	674.55	999.06	2097.48	1219.57	1087.47	1373.67	1045.75	1795.84	2015.05	1483.46	860.14	1451.33	1278.22	971.6	1091.63	2852.92	1409.6	2010.49	1165.96	746.78	655.44	1010.16	1819.54	1161.06	411.43	738.62	1393.62	1148.99	1577.99	1721.06	1944.99	1598.6	898.98	871.86	1189.94
201089_at	ATP6V1B2	828.42	590.03	423.08	666.57	630.41	472.9	424.36	446.33	933.65	425.02	1022.39	574.28	963.53	694.54	985.39	612.88	439.31	554.02	1008.78	672.59	475.83	736	390.27	433.35	521.92	560.66	579.09	449.73	504.54	647.67	452.42	655.66	520.32	515.11	556.89	553.73	716.8	566.19	261.55	549.91	320.6	502.11	636.44	378.54	287.6	348.9	495.28	590.39
201090_x_at	K-ALPHA-1	5416.6	4838.93	4262.68	6227.54	7073.38	5295.4	4291.01	5194.58	5214.69	5401.6	4085.01	3936.89	5583.41	3735.49	6408.04	6110.21	4164.52	5935	6086.67	4518.78	5327.84	8100.91	6014.44	5078.24	5257.66	4371.33	4571.57	4734.86	4651.49	6759.77	5866.24	4320.93	4001.58	4625.6	7203.16	5734.13	7298.75	4698.92	1856.52	5107.07	7255.57	6068.25	4701.96	5375.01	5070.74	4170.42	5052.63	5233.54
201091_s_at	CBX3	366.1	332.3	612.19	822.62	632.89	638.63	402.94	580.66	520.16	616.88	483.49	465.36	491.97	268.83	415.06	487.02	675.64	424.58	269.46	425	560.88	515.51	611.36	369.63	481.81	490.24	601.69	390.33	428.27	270.22	608.01	610.98	454.57	258.14	426.86	327.8	310.7	423.36	243.85	494.11	359.56	201.08	1041.72	719.17	718.33	470.42	511.62	649.64
201092_at	RBBP7	1220.19	1012.95	1024	1061.46	1715.25	1443.3	876.89	1036.71	670.11	959.78	830.06	731.43	768.6	448.01	504.95	825.38	852.31	882.76	510.52	922.84	563.46	1299.63	590.34	583.17	1061.2	809.81	721.85	3820.55	942.5	758.44	684.2	1474.07	1172.39	660.82	867.49	1200.94	807.35	742.34	505.62	616.89	1308.82	1102.29	756.09	629.36	771.59	1760.71	950	902.82
201093_x_at	SDHA	563.52	563.5	525.77	407.23	759.26	1071.46	502.07	958.55	478.94	566.2	513.64	437.21	340.14	396.86	604.17	694.59	506.56	454.71	980.26	417.68	796.47	757.42	498.91	768.76	499.76	552.17	454.47	482.44	900.26	711.12	792.88	607.09	331.73	566	509.96	427.73	609.35	488.9	484.59	727.56	627.75	611.2	666.68	428.14	593.76	489.82	673.72	616.88
201094_at	RPS29	5792.15	3573.62	4505.17	5235.54	5584.56	5027.61	3133.25	3036.13	5667.39	2509.21	5976.82	4592.37	3545.64	3427.23	4788.63	3943.95	4131.45	1936.95	1485.27	5770.67	7419.31	3873.28	3021.78	1805.16	2163.38	4383.76	4218.62	3742.27	1772.55	5794.25	5066.32	5320.82	3974.54	3601.37	3331.88	5107.84	3414.08	5524.73	7028.17	5776.51	2186.71	1330.01	4460.45	6294	6480.8	6375	5218.04	5102.98
201095_at	DAP	568.03	333.63	443.14	320.74	475.47	660.27	214.95	650.4	276.57	371.77	333.99	593.18	464.3	445.09	433.53	500.35	384.41	628.74	829.22	446.31	369.76	293.13	361.95	979.43	428.59	923.05	566.05	876.6	1378.61	787.55	909.79	535.57	570.35	528.4	408.79	536.29	623.41	604.66	278.31	452.23	490.67	648.67	631.06	344.26	717.73	412.28	1189.58	398.06
201096_s_at	ARF4	780.35	409.73	686.34	1474.2	690.09	826.7	473.85	518.27	561.32	644.98	729.83	550.75	881.17	647.23	755.74	857.21	759.73	652.13	518.31	1004.07	570.7	851.18	802.33	542.17	524.21	460.38	824.15	1124.25	577.14	574.65	751.28	728.49	842.7	736.27	640.52	571.81	778.01	1116.15	189.67	1237.85	383.76	1029.39	756.45	710.25	1430.39	497.72	1314.36	700.31
201097_s_at	ARF4	2018.73	1369.1	1980.53	3252.89	1608.15	1719.18	1336.27	1635.43	1421.1	1511.87	1929.12	1663.53	2069.93	2026.2	2020.25	1886.63	1660.87	1864.64	1241.57	1975.07	1976.38	1738.69	2195.85	1604.88	1364.72	1538.63	2120.9	2779.02	1705.29	1353.89	2034.8	2164.92	2689.33	1742.02	1607.04	1498.93	2039.32	2760.68	925.69	3073.25	708.76	2230.19	1639.75	1471.62	2881.55	1534.16	2478.83	1620.76
201098_at	COPB2	1860.42	848.11	877.44	1218.78	1164.67	1398.57	1105.51	1699	1048.29	866.37	1064.17	1138.8	1081.9	637.73	790.39	1483.71	1017.89	2160.54	1235.87	1307.25	800.07	980.45	753.06	1123.77	937.69	1990.27	1424.34	1298.07	783.75	1276.19	738.63	999.04	989.77	831.11	686.98	760.16	726.27	1172.06	620.9	925.64	843.4	1597.46	1206.27	1063.56	1518.86	1169.45	1865.98	1240.1
201099_at	USP9X	574.57	420.93	245.28	574.56	658.7	413.21	376.14	425.88	300.28	178.93	575.88	532.76	347.96	329.03	397.19	449.75	317.08	293.06	186.84	320.13	243.14	468.42	211.91	395	447.96	389.69	585.6	511.89	431	346.43	407.66	468.66	363.25	446.19	367.09	363.17	315.48	249.91	235.78	418.63	237.73	419.57	474.6	471.58	406.07	541.09	388.06	299.78
201100_s_at	USP9X	1351.77	1344.06	672.2	1525.49	1892.82	1198.92	1078.71	1573.54	996.11	775.57	1484.31	1549.18	935.01	911.01	1139.68	1145.98	1046.64	1034.5	722.55	1324.22	607.38	1085.03	583.42	1231.94	1540.64	1275.92	1646.57	1139.67	1082.25	889.3	1136.69	1811.16	1036.26	1173.39	854.92	977.09	1079.98	820.11	758.11	935.94	1063.17	1465.39	978.03	1446.9	1093.92	1430.05	751.84	864.94
201102_s_at	PFKL	464.38	330.59	222.08	209.71	385.77	267.35	268.19	286.97	303.14	260.7	210.66	356.59	279.73	232.7	235.91	267.79	220.64	217.74	318.01	260.12	310.68	319.78	264.5	385.45	381.21	371.87	237.05	354.73	204.55	233.73	313	287.43	214.93	333.45	328.22	248.79	350.27	331.78	163.21	491.46	464.28	346.71	243.54	257.18	275.14	276.97	247.87	371.29
201103_x_at	MGC8902	1182.05	2389.3	1634.55	1609.56	2183	894.07	1858.54	1129.74	1333.66	1397.31	1599.69	1714.88	1787.45	1845.69	1445.54	2846.35	1906.49	1347.3	1687.44	1193.56	2029.8	1880.53	1513.14	1404.48	1333.77	1159.42	1324.93	1910.12	2147.61	1509.01	2067.02	1704.29	2051.78	2071.94	2393.53	1911.75	2067.56	2040.91	1588.9	1618.76	3815.56	2267.4	1102.91	2200.69	1870.38	1482.62	1435.39	1635.28
201104_x_at	DJ328E19.C1.1	826.29	1842.02	1159.08	1244.4	2393.01	558.07	1491.6	858.44	1006.87	1098.66	1176.67	1359.46	1402.92	1363.13	1250.01	2529.06	1875.06	969.72	1445.29	998.96	1266.08	1529.71	1227.49	990.84	1032.6	846.5	981.74	1357.86	1534.69	1038.74	1791.61	1396.24	1612.12	1879.62	1932.22	1528.52	2015.33	1551.67	787.21	1247.4	3810.25	1869.32	896.63	1846.16	1323.02	1171.93	1181.16	1586.35
201105_at	LGALS1	2379.45	2500.8	1775.09	3432.7	2215.88	1584.86	1346.08	1130.94	3945.24	2704.2	3532.09	1996.97	4205.73	3286.8	3109.37	1291.88	1989.6	4344.61	2802.46	2183.84	2897.11	1944.76	3245.26	2052.89	1738.44	3010.97	3858.51	4154.76	1682.91	2871.87	4298.67	1671.47	3048.83	3116.8	4116.88	4472.65	3967.69	3260.15	2021.27	7216.62	351.37	5320.31	2284.92	2438.81	3335.77	3204.87	4093.56	4749.21
201106_at	GPX4	3017.06	2001.21	2302.15	979.44	1719.57	1841.35	1714.65	1594.6	2222.73	1627.6	1737.16	1701.93	1458.54	1868.49	1470.03	2470.26	1330.94	1007.72	1242.31	1227.43	1642.42	1367.11	1300.6	1020.56	1217.52	1980.63	2553.32	2880.48	1129.56	1348.61	1916.12	2030.25	2081.81	2310.04	2230.53	1518.28	2477.49	2506.83	1314.93	2340.7	1705.12	1070.12	1402.66	1304.92	1514.89	2524.97	1743.12	1385.87
201111_at	CSE1L	550.51	542.48	398.49	391.72	320.4	611.49	319.38	305.28	319.44	631.33	256.18	229.06	171.79	107.99	266.71	307.06	405.81	296.34	248.56	124.64	653.48	626.82	239.82	741.35	223.03	356.96	444.32	216.78	290.94	219.68	419.14	252.45	264.11	151.25	356.98	262.22	201.25	181.94	150.82	399.69	463.38	228.77	404.42	412.66	307.01	289.45	356.71	398.8
201112_s_at	CSE1L	1447.94	1465.2	1261.67	975.39	1361.44	1812.02	616.27	1098.36	1098.93	2231.23	706.55	647.27	597.67	409.39	677.68	863.55	1552.62	734.26	1145.31	713.18	1183.24	1249.7	812.16	1976.89	710	1316.85	1837.25	1015.5	632.92	608.37	1400.66	802.45	841.88	684.07	1097.4	748.13	891.06	613.78	402.27	1401.66	1670.57	1108.79	1333.83	830.72	673.43	770.2	1812.35	1071.45
201113_at	TUFM	666.69	778.49	1214.62	970.05	1359.9	1875.5	922.25	1137.17	712.6	1251.26	678.05	1051.56	960.36	743.05	910.19	899.9	734.02	667.35	904.52	948.48	795.96	637.93	706.72	1259.58	703.41	988.2	615.73	911.33	778.58	750.16	1190.36	856.86	1312.89	659.71	722.53	486.16	902.36	653.92	696.76	803.84	1005.33	662.28	924.6	659.4	1125.5	1059.65	1122.68	504.54
201114_x_at	PSMA7	982.67	1224.93	1619.26	1371.17	1271.48	1689.09	679.81	1310.82	1504.9	1314.04	886.59	452.61	744.08	478.87	884.71	695.05	1015.98	1135.19	1048.05	837.26	895.75	875.38	861.66	704.11	1166.81	1123.52	1397.09	1221.86	537.02	674.95	1194.74	864.68	715.7	537.37	533.45	931.08	710.85	540.68	580.1	1466.89	688.48	420	830.54	951.54	1633.71	869.1	480.82	884.85
201119_s_at	COX8A	1576.6	1639.15	1227.78	1124.57	1297.04	1852.56	1457.59	1022.2	1301.09	1152.1	1035.09	1092.35	1311.19	1034.77	1456.34	1129.25	1358.4	939.21	956.22	1378.34	836.04	1039.65	1255.87	1741.42	1211.34	1551.79	1219.69	1793.47	824.89	1403.26	1285.19	1446.56	1375.02	1044.43	1344.04	1385.21	1395.99	1209.65	713.04	1062.31	1520.17	942.25	1191.46	1991.74	1244.13	925.15	1828.19	1731.34
201121_s_at	PGRMC1	1587.87	701.86	1419.64	1636.78	1191.59	1816.04	1155	1977.25	749.3	745.72	644.96	1020.32	2258.82	674.6	738.79	1468.15	1667.23	1796.61	1073.79	991.82	1740.95	1304.47	1379.03	994.42	1137.01	1105.38	1084.47	1705.75	995.11	1297.88	1751.79	1298.63	1113.76	1044.91	1090.38	1214.55	1016.42	843.61	165.05	2730.63	1765.48	1500.11	2046.58	2166.4	2199.52	1135.08	1163.3	1376.46
201122_x_at	EIF5A	623.24	743.24	417.61	645.86	805.65	569.7	341.6	248.12	329.16	423.2	252.98	246.01	633.18	499.87	728.99	907.45	201.91	425.16	477.11	482.2	328.13	514.38	249.75	511.45	514.39	448.26	636.32	526.39	441.03	655	242.52	572.58	542.73	593.91	600.34	476.92	925.27	294.28	342.57	391.9	689.87	514.26	616.28	1025.49	281.38	417.49	478.36	656.17
201123_s_at	EIF5A	1855.11	1253.71	644.63	1316.09	1731.22	1012.78	409.7	346.29	557.89	678.78	362.99	208.24	1427.12	775.09	1452.13	1676.63	297.34	594.27	722.04	703.05	435.9	1249.8	306.21	816.43	702.89	586.77	1258.58	985.86	827.35	1401.21	339.78	911.73	824.95	1100.24	1202.5	933.82	2208.04	323.13	175.95	687.39	1108.1	907.65	1489.06	2220.26	381.45	592.41	1110.57	1420.68
201126_s_at	MGAT1	336.01	398.92	237.26	327.57	382.31	310.57	364.61	262.34	328.93	231.81	419.63	472.38	289.72	520.29	519.77	396.01	281.72	268.45	414.47	489.9	272.25	220.28	261.47	307.12	275.45	214.44	299.99	281.04	264.14	322.1	253.65	331.08	280.96	416.38	498.13	397.55	625.47	329.97	256.37	278.87	209.85	362.21	256.6	339.42	178.91	218.42	262.4	228.96
201127_s_at	ACLY	226.08	202.41	176.89	265.7	297.54	695.96	192	176.54	253.54	240.16	147.97	183.29	171.69	159.98	202.1	267.04	242.11	137.34	321.04	238.51	306.56	326.34	169.1	180.89	181.57	224.32	419.7	180.06	238.41	154.71	349.23	478.87	230.13	182.65	168.44	173.32	310.4	219.91	118.42	288.72	288.04	226.52	318.66	343.77	197.94	224.37	252.66	246.36
201128_s_at	ACLY	819.04	627.91	697.75	1017.9	845.4	1903.92	642.53	667.16	887.49	768.77	544.25	481.12	587.02	461.24	665.93	792.82	583.39	626.1	883.48	573.63	1261.12	1179.77	640.43	507.62	590.98	853.63	1443.09	640.77	779.33	491.63	1002.97	1331.63	605.08	596.91	567.49	498.93	918.07	732.65	503.21	1142.1	905.67	741.88	1000.84	1070.56	695.26	816.25	872.94	702.33
201129_at	SFRS7	607.71	250.27	522.8	159.47	254.7	230.15	282.73	204.24	451.28	165.04	345.01	267.78	182.13	312.96	284.88	337.87	156.24	374.81	300.58	107.48	330.5	276.63	269.3	386.46	450.47	235.78	238.37	295.97	226.01	210.39	256.25	165.56	199.37	299.82	417.01	295.73	184.65	249.97	302.13	279.7	413.01	138.46	399.91	448.08	381.82	363.53	388.42	186.56
201132_at	HNRPH2	408.74	202.08	256.31	453.86	171.72	612.11	430.44	419.1	232.31	196.43	460.39	507.16	349.4	398.23	230.23	439.43	482.17	268.87	258.52	220.97	497.06	515.44	355.78	232.3	237.75	390.76	346.45	475.37	354.27	376.39	387.48	415.06	446.59	388.62	191.98	324.66	320.28	370.62	250.83	598.52	481.37	288.12	517.65	516.59	411.22	555.72	515.24	417.39
201133_s_at	PJA2	272.21	232.39	238.45	297.63	169.06	271.87	290.84	308.15	384.39	281.7	441.71	209.58	238.45	352.31	312.07	239.52	243.66	400.54	257.16	189.82	412.48	621.79	438.75	394.95	358.37	416.5	375.59	264.48	310.9	361.1	386.29	305.06	273.46	486.17	326.13	284	186.55	433.44	679.02	299.58	200.85	345.47	368.9	216.25	403.07	594.43	600.96	345.82
201134_x_at	COX7C	1181.19	990.98	1755.19	1597.7	1577.69	1858.01	991.97	923.46	1543.12	885.76	1818.1	1312.28	893.19	901.81	1568.31	981.73	1089.85	726.76	466.16	1455.58	1511.24	1071.69	725.59	595.5	518.01	1102.35	1111.89	1520.67	589.74	950.7	2406.71	1066.07	1440.87	1216.53	1691.2	1683.72	825.26	1704.76	1878.84	1662.74	906.34	312.68	1205.5	848.2	1387.99	2566.58	889.74	1716.31
201135_at	ECHS1	1291.83	810.2	740.73	784.42	1056.19	1862.39	701.86	982.11	607.7	807.96	1240.37	1241.91	1636.21	608	1053.13	940.88	833.04	551.76	816.18	585.29	804.58	776.8	784.24	458.5	558.19	1205.27	554.64	920.43	1139.78	867.98	884.13	1016.68	1208.17	946.95	504.31	571.93	1241.88	927.05	565.37	677.91	760.31	832.89	630.99	621.4	1547.69	749.99	1102.76	1963.31
201136_at	PLP2	790.83	1231.67	1034	574.68	1689.94	974.24	897.16	1971.59	756.75	667.32	541.06	689.66	965.99	602.34	1543.75	855.81	951.91	1253.52	1985.51	1717.52	621.09	1653.74	1279.15	1164.66	939.15	900.7	1938.29	677.73	806.78	756.53	1152.9	1363.94	1310.64	779.99	549.75	1285.75	1699.03	1336.39	655.74	1137.46	713.73	2425.79	634.2	714.69	897.26	828.29	632.2	995.01
201137_s_at	HLA-DPB1	2410.57	1963.5	683.59	1430.1	1617.64	1800.72	2065.22	1369.17	2975.22	759.69	3513.95	2872.18	1809.53	2634.52	4041.04	1913.9	793.31	1029.52	754.17	2018.77	1486.22	2241.74	988.5	598.28	1664.56	1967.41	1382.7	1201.78	808.59	2776.25	774.4	1037.1	1190.31	1869.54	1016.43	1899.98	2925.15	1222.78	3114.84	1545.85	651.7	483.58	2232.98	373.63	472.89	646.24	1669.02	1471.35
201139_s_at	SSB	470.19	323.95	480.26	748.55	612.35	400.12	399.63	304.03	408.63	518.52	427.61	204.24	209.36	201.44	394.76	408.72	617.46	305.51	304.2	306.45	559.75	429.96	375.41	407.2	327.9	378.55	264.64	338.17	296.8	262.36	405.45	194.07	171.26	246.74	219.42	235.61	276.58	206.34	200.09	748.29	292.72	248.12	347.93	502.16	697.2	282.64	477.54	286.79
201141_at	GPNMB	1644.35	1784.3	3772.39	3329.48	1561.51	726.53	2079.19	1212.1	2565.69	1067.23	4818.24	2381.34	2010.6	1985.45	3371.41	1664.46	3017.45	2660.93	1038.08	5063.84	2159.49	851.43	1701.4	2454.77	2135.73	2479.81	2072.7	3087.26	2349.45	2481.42	5547.71	4489.8	1345.48	2965.52	2271.2	1688.01	3433.67	2091.07	1604.29	2255.09	636.96	3675.58	2100.19	1533.84	1549.8	1196.42	2178.18	1843.26
201142_at	EIF2S1	205.07	171.26	285.83	187.2	181.81	196.26	206.38	156.28	216.1	190.76	246.34	180.96	155.04	180.96	136.03	190.56	141.6	201.75	256.19	158.89	486.64	438.49	218.39	219.64	137.94	182.91	235.61	195.66	233.17	184.39	291.13	309.8	188.63	210.46	164.22	149.24	160.99	136.69	163.83	294.5	215.46	217.75	194.44	281.02	161.74	237.61	217.36	195.84
201144_s_at	EIF2S1	436.94	442.96	452.67	587.92	607.16	573.82	439.47	346.29	725.53	682.11	446.36	306.94	276.01	293.42	378.88	559.17	456.47	398.5	395.35	376.62	718.05	721.26	429.76	383.88	400.19	361.55	574.34	332.14	241.37	408.13	668.39	289.42	402.6	300.97	304.23	369.56	367.11	284.23	306.69	601.58	605.9	319.46	484.82	779.04	431.81	509.04	512.6	591.75
201145_at	HAX1	831.02	975.23	434.11	982.8	1581.01	890.4	655.52	619.55	724.2	660.98	536.87	911.82	543.09	460.14	1019.67	1592.95	1033.26	860.65	773.73	911.34	719.2	597.19	393.05	367.66	660.83	595.42	602.51	487.66	406.21	725.72	1501.6	693.89	913.66	383.14	650.93	676.53	770.04	873.14	523.45	568.4	512.11	719.54	512.17	735.21	932	873.93	628.21	859.01
201146_at	NFE2L2	538.73	539.5	593.05	1029.02	739.36	807.96	561.56	506.59	637.83	1078.22	1360.04	581.53	577.53	787.12	778.11	896.86	829.34	1167.82	587.28	689.17	999.59	551.41	522.95	1147.87	776.36	920.87	714.08	806.02	1828.45	712.98	630.93	648.55	673.38	883.44	598.45	655.56	563.17	783.48	521.78	971.25	652.04	962.52	771.46	952.13	710.3	706.93	808.74	814.76
201147_s_at	TIMP3	301.54	647.89	548.31	598.7	215.82	142.19	235.77	194.39	296.97	238.75	365.58	436.51	843.45	269.79	332.7	249.52	550.07	524.04	333.25	193.96	263.39	165.74	1483.49	891.98	421.49	343.81	1068.93	1019.57	469.84	477.8	402.8	844.98	659.09	962.52	1042.74	264.3	550.58	1170.2	137.06	543.51	164.28	1564.23	318.48	395.6	849.14	730.05	1877.44	542.71
201148_s_at	TIMP3	153.98	396.88	361.16	320.89	156.58	122.8	162.46	158.26	255.16	182.54	210.16	211.37	447.1	162.22	318.63	155.58	304.34	442.07	211.86	132.03	165.56	112.95	1164.98	626.12	389.22	352.65	719.29	707.61	267.87	336.98	289.77	394.16	363.58	616.29	647.66	166.44	366.88	691.8	197.93	325.52	116.69	823.08	167.63	185.06	436.37	610.22	1123.41	363.86
201150_s_at	TIMP3	455.36	1393.1	1405.63	1016.03	413.86	319.55	609.9	365.09	609.19	444.5	782.66	773.23	1466.26	629.84	946.12	530.72	1060.25	1225.37	600.73	270.66	662.87	321.89	2765.86	1978.59	867.96	1010.13	2074.92	2799.08	1184.43	1078.61	911.58	1342.08	1144.48	2221.28	1510.59	488.43	997.57	2170.95	510.88	1064.33	301.87	2530.45	513.25	460.78	1045.16	1739.57	3580.39	840.79
201153_s_at	MBNL1	1182.31	781.67	612.66	749.47	655.82	743.47	1190.52	788.49	724.43	512.86	1292.35	1033.34	1008.24	1177.27	724.48	932.58	492.88	1085.5	752.77	338.92	904.59	1233.52	682.69	481.34	748.58	836.32	688.93	661.5	726.23	984.67	411.94	1052.45	528.31	928.01	684.17	1053.81	629.15	563.53	1193.2	687.39	742.74	638.98	1158.13	704.53	450.85	561.74	793.84	784.04
201154_x_at	RPL4	4603.04	3347.57	5908.4	4255.48	2656.2	3247.53	3038.79	3188.88	4704.21	3273.44	2722.47	4622.38	4268.38	3872.11	3576.81	3390.25	3146.86	1727.5	2863	3885.26	5520.72	3441.44	3250.81	2973.04	2841.6	4261.65	3676.26	2848.49	1689.64	3421.89	2816.6	1994.05	2891.33	3346.37	3209.04	2970.67	3121.27	3022.15	4496.34	2811.48	2186.47	1373.63	3394.19	2868.05	3318.82	4502.08	2064.43	2598.19
201155_s_at	MFN2	279.76	287.56	267.48	319.72	388.52	542.02	309.18	250.96	185.62	430.3	216.72	188.48	214.97	248.48	311.96	275.45	330.95	254.87	330.79	287.65	335.51	288.58	310.93	335.29	415.23	180.15	207.83	290.88	186.55	281.24	320.34	211.38	238.85	245.19	314	176.92	289.08	199.23	248.41	224.06	374.48	235.35	219.41	201.11	259.17	155.75	231.39	214.89
201157_s_at	NMT1	499.53	280.99	271.8	420.38	485.83	401.68	264.08	441.79	345.56	269.95	320.1	241.44	280.49	273.97	353.45	353.11	260.03	268.15	402.81	336.79	276.28	440.77	382.02	157.7	340.89	314.67	280.78	220.12	164.53	466.39	254.43	162.27	218.68	215.09	282.1	322.9	365.17	250.98	328.77	330.8	313.77	203.51	418.95	472.03	320.63	143.14	287.89	362.14
201162_at	IGFBP7	2085.72	1252.81	1268.28	1370.15	1024.78	944.04	794.52	573.09	1038	1266.26	1207.48	611.79	2154.3	2947.22	1476.36	1059.02	1135.77	792.94	2051.87	1363.39	1060.68	995.42	1446.1	1091.65	1511.04	985.11	1675.17	2134.37	1356.28	1956.49	1014.66	1000.84	1785.87	4426.99	2029.19	1282.52	2362.22	2908.42	358.67	1049.61	568.95	2035.69	1764.31	613.05	876.86	1236.27	2257.87	1083.67
201163_s_at	IGFBP7	1782.37	1489.72	1702.81	1327.92	771.67	1491.6	1223.42	575.61	1395.7	1504.34	1661.47	809.76	1806.57	2844.61	1038.64	949.55	982.28	1172.81	1749.65	792.88	1368.43	1587.1	1646.85	1188.98	1722.58	1259.87	1950.08	2180.32	2244.38	1998.99	1093.83	960.57	1353.59	2840.16	1325.28	1072.32	1530.71	2322.54	553.61	1518.86	434.7	2000.65	2580.99	962.24	1078.8	1589.43	2622.63	1317.7
201164_s_at	PUM1	585.62	721.48	795.13	616.87	611.16	612.56	752.55	1352.9	927.57	1324.8	644.32	595.66	904.46	604.94	559.13	599.96	780.7	1373.44	889.61	728.77	909.85	942.2	1554.37	1177.29	1330.24	705.78	711.55	569.99	637.59	705.25	726.17	825.58	696	895.15	946.05	616.16	674.7	524.74	718.96	564.25	1053.27	761.35	717.96	876.57	1050.35	589.55	627.54	892.14
201165_s_at	PUM1	543.51	622.25	846.69	706.49	454.03	541.64	594.14	831.19	656.84	827.32	566.92	558.45	831	538.42	538.15	493.64	671.73	645.86	713.51	666.3	770.55	786.98	990	637.08	744.53	462.6	460.09	459.52	565.52	588.73	625.11	723.07	495.65	657.87	937.01	615.42	540.36	455.82	543.78	609.47	734.66	751.58	620.59	680.31	667.04	386.8	609.38	603.83
201166_s_at	PUM1	970.05	1361.12	1751.8	1304.11	1160.26	1120.83	1334.57	1567.67	980.93	1562.49	1240.84	1007.36	1491.03	1077.38	1190.02	1050.53	1406.39	1315.1	1294.78	1221.39	1783.85	1759.21	1785.61	1277.47	1313.8	902.09	913.2	1043.74	1432.71	1368.65	1540.51	1384.1	974.34	1290.91	1659.07	1224.09	1183.28	868.86	766.81	1168.54	1496.81	1270.42	1675.41	1633.23	1213.7	814.5	1495.29	1475.87
201168_x_at	ARHGDIA	291.65	436.66	245.9	412.3	432.89	305.05	322.64	465.51	261.42	222.78	342.01	417.5	630.67	425.25	425.11	577.48	438.93	337.09	879.71	649.95	257.8	244.69	344.39	373.51	490.55	267.76	271.24	363.22	602.82	240.41	817.38	745.22	393.19	504.57	422.14	695.05	558.19	283.65	345.59	239.92	597.09	747.05	208.63	217.28	160.09	241.66	244.94	325.97
201170_s_at	BHLHB2	1158.21	1279.58	652.94	502.43	1217.37	1223.02	795.32	1326.27	725.17	570.77	835.54	1047.46	800.55	664.61	1368.51	2307.46	934.94	1045.67	1541.09	1104.79	1409.53	494.92	593.66	842.34	894.46	441.87	944.02	981.22	776.37	1334.51	1416.6	1161.97	1117.55	1423.56	1323.96	1099.37	907.65	4042.74	679.83	1066.53	922.54	2719.46	1259.73	475.83	1581.24	958.3	1106.4	842.26
201172_x_at	ATP6V0E	1226.8	807	1110.33	1229.3	1015	1287.23	1019.83	696.02	1020.13	983.28	1450.29	944.09	1174.24	1071.92	1755.55	860.49	876.13	1017.85	818.17	1788.43	778.32	557.92	776.02	548.99	952.23	689.21	1378.88	1626.77	682.22	754.21	1402.66	855.96	1438.93	994.51	921.85	1029.83	2004.75	863	1006.58	1159.7	312.28	542.27	1240.73	491.12	683.78	1205.29	1164.35	802.13
201173_x_at	NUDC	536.88	640.19	540.98	585.09	581.96	571	496.57	1023.51	494.89	717.39	315.83	341.71	638.3	326.43	460.27	530.72	613.26	617.07	799	545.02	936.98	714.47	708.78	553.7	676.95	359.16	457.45	487.37	341.54	534	502.25	362.48	426.46	482.79	587.96	604.89	462.5	377.63	375.02	472.07	845.2	325.15	568.9	479.23	643.66	359.23	473.14	567.24
201174_s_at	TERF2IP	385.44	398.92	514.95	384.88	304.09	301.3	800.54	555.77	431.5	211.02	597.33	512.53	391.05	591.02	393.29	393.99	253.07	362.69	320.36	435.84	382.44	282.89	409.87	324.68	388.27	424.24	347.45	503.43	385.45	488.57	324.2	395.79	538.15	424.74	288.65	297.2	357.8	343.73	692.19	363.17	256.34	392.3	365.37	224.18	594.8	202.92	645.59	377.7
201175_at	TMX2	818.3	442.04	680.51	569.99	507.8	891.09	523.89	692.18	462.33	947.19	587.38	644.83	891.63	417.96	782.5	506.77	725.92	365.5	907.43	538.32	2235.31	371.53	894.05	531.08	447.95	491.79	657.66	725.73	658.49	645.48	447.81	762.67	747.89	642.74	566.98	650.85	525.54	550.17	298.5	518.78	704.76	411.42	875.52	801.45	782.78	497.65	1043.58	664.05
201176_s_at	ARCN1	594.57	734.51	717.33	794.12	787.06	1017.36	701.58	892.27	765	739.65	824.48	801.66	1248.5	686.53	890.09	1169.16	1031.21	911.29	975.17	1087.12	551.18	594.21	1150.1	1170.06	993.55	1209.08	1014.03	1092.8	1289.59	1078.8	604.71	733.68	1211.41	790.7	630.74	635.82	1009.74	1061.2	586.39	743	518.59	1090.04	1212.17	935.67	2422.96	626.08	1050.42	1064.38
201177_s_at	UBA2	978	402.23	698.33	897.65	401.58	1137.93	561.02	546.65	611.22	629.28	574.95	330.44	387.15	329.78	161.53	399.1	503.84	623.76	642.83	705.34	776.25	820.56	575.6	280.34	575	546.74	424.39	386.76	1172.15	581.64	563	592.71	179.57	299.8	379.87	377.23	263.67	396.19	306.54	591.12	616.01	535.42	547.48	1077.86	578.49	270.2	411.69	411.5
201178_at	FBXO7	576.4	542.81	497.03	533.77	695.68	448.84	618.01	478.09	576.38	536.19	664.54	618.47	600.08	474.86	724.47	565.77	540.58	867.79	654.07	972.39	466.75	593.91	826.61	576.34	542.84	571.75	510.77	550.28	420.35	491.28	1525.36	387.54	754.78	528.04	346.99	610.35	643.64	469.06	509.16	735.01	435.26	684.51	540.86	453.33	801.58	497.25	438.93	459.38
201180_s_at	GNAI3	960.6	587.72	652.69	995.46	1228.98	908.05	845.43	706.59	917.79	1003.08	1220.8	483.95	684.82	546.15	755.19	487.06	762.95	528.45	542.35	713.94	1346.35	1085.17	893.85	798.09	332.93	1055	726.85	1004.82	1086.69	844.15	972.21	1059.84	710.65	731.97	889.41	1230.81	977.61	454.58	266.06	1087.05	648.49	640.73	946.73	1344.18	676.03	822.6	793.14	1099.88
201184_s_at	CHD4	270.45	354.14	374.34	455.99	414.93	733.93	368.83	352.62	402.92	348.8	315.19	396.74	441.73	346.99	403.4	480.64	377.1	242.62	381.32	418.29	402.58	286.3	325.45	364.42	311.35	278.96	261.21	331.29	392.9	313.33	281.37	279.68	375.2	355.54	347.42	341.19	379.76	287.97	233.39	240.73	519.54	319.2	324.28	322.31	257.05	293.05	268.99	474.85
201185_at	PRSS11	502.18	592.82	497.9	1011.52	257.04	504.49	282.56	293.26	460.41	104.08	1282.04	308.26	831.85	1660.11	528.81	433.49	440.17	768.83	367.01	519.59	588.44	234.71	844.19	1317.87	485.49	881.4	922.92	1333.7	743.32	343.45	490.04	1160.13	1260.21	2077.52	1601.98	485.19	1196.25	1553.04	175.05	357.8	202.41	1287.87	546	360.47	448.45	1156.3	1116.89	495.46
201186_at	LRPAP1	210.06	194.63	223.14	221.25	281.86	384.44	229.86	346.39	302.09	196.76	288.41	242.28	306.14	255.62	296.71	192.79	151.97	259.27	184.9	228.69	188.8	176.65	194.5	204.45	224.93	170.24	259.57	246.39	227.65	291.8	247.72	176.78	348.2	281.87	328.44	257.29	291.67	215.05	208.41	245.36	180.7	270.51	305.93	486.57	273.84	198.7	344.03	255.03
201189_s_at	ITPR3	609.09	545.15	481.83	319.09	734.77	751.99	680.48	1152.46	636.96	544.44	409.58	716.3	823.71	614.36	690.94	661.72	745.75	723.54	781.65	530.89	813.03	778.86	977.69	444.26	974.11	284.2	403.4	607.01	967.14	338.3	254.63	1055.3	819.02	424.72	695.74	727.79	1029.21	663.73	712.37	326.59	1672.28	622.55	535.08	433.58	298.34	421.33	332.43	274.87
201190_s_at	PITPN	396.6	357.34	340.64	409.06	329.2	382.67	352.91	244.46	328.24	386.96	308.12	423.61	327.62	366.76	399.02	411.57	216.98	375.03	475.45	422.18	315.66	536.83	403.29	245.66	305.15	629.52	443.59	410.34	385.95	368.22	413.48	325.8	420.88	450.12	505.73	308.01	597.77	259.39	315.42	388.25	224.37	279.65	318.52	427.85	446.58	355.34	394.9	351.78
201191_at	PITPN	267.19	199.46	218.19	275.85	235.2	268.74	202.22	133.62	221.04	273.37	175.98	267.18	226.42	202.75	289.55	279.25	173.72	219.13	329.23	291.28	167.45	304.58	264.46	139.49	176.65	435.69	325.81	263.2	255.24	213.05	248.8	203.47	241.51	261.11	252.83	196.41	388.14	161.02	201.61	242.17	142.23	180.37	181.99	270.6	299.19	224.62	200.55	206.37
201192_s_at	PITPN	238.14	203.28	216.69	393.2	280	409.47	200.86	251.37	251.16	237.17	274.48	268.24	226.77	306.74	320.16	275.84	251.59	250.98	427.28	450.2	182.81	298.14	394.4	215.25	168.19	334.77	304.14	218.21	173.82	323.58	277.12	219.49	291.76	243.55	282.05	257.72	428.24	140.98	278.25	287.75	306.27	224.48	251.16	485.17	340.45	164.58	219.21	227.34
201193_at	IDH1	915.44	676.88	685.61	1662.99	904.23	2003.63	884.79	1034.79	635.55	532.26	1382.64	1625.2	800.14	704.71	1230.48	631.28	816.48	1281.59	716.53	1169.46	733.99	492.63	393.84	836.27	751.85	756.33	997.92	2695.44	976.55	626.28	1286	734.15	1737.42	1416.01	603.81	805.21	667.48	529.49	252.7	1109.05	431.32	1019.45	1184.42	1184.24	436.63	1475.7	908.19	1088.09
201194_at	SEPW1	453.08	911.01	484.32	939.87	1455.48	1406.32	436.81	865.76	645.09	356.85	695.32	505.96	871.33	851.66	1250.25	319.56	580.66	763.36	364.41	971.29	326.34	497.25	482.36	504.18	570.83	494.43	680.77	788.39	358.1	681.5	1267.25	623.02	628.3	823.04	461.18	562.24	984	1044.05	260.7	1335.57	254.67	1007.02	557.15	665.66	759.9	411.71	641.52	388.01
201195_s_at	SLC7A5	233.47	606.85	2004.44	875.74	897.44	1712.73	717.05	1978.93	380.32	487.86	279.74	780.21	875.68	193.26	532.25	1250.55	795.67	492.65	712.44	760.77	632.79	139.53	370.67	635.11	582.18	332.63	550.65	367.34	247.12	886.5	676.26	577.25	2819.74	172.79	224.23	414.15	431.16	224.24	428.78	372.91	551.38	1543.45	140.35	607.01	661.29	493.57	432.23	504.86
201197_at	AMD1	665.47	264.07	578.25	484.09	330.03	550.2	334.79	455.25	457.66	464.39	493.49	346.52	289.75	226.72	298.98	330.63	385.48	293.14	367.83	580.9	329.88	924.11	597.15	273.76	394.93	476.51	420.73	241.58	261.9	395.16	271.98	756.83	271.46	229.91	250.97	647.69	422.07	225.74	300.52	746.9	334.69	298.41	279.19	318.86	316.75	345.49	388.59	416.35
201199_s_at	PSMD1	666.04	626.61	588.28	787.99	602.26	867.86	665.27	476.1	763.66	912.78	991.6	802.21	869.96	464.89	664.46	797.24	688.87	657.88	813.01	901.66	683.5	636.36	602.7	595.87	578	669.82	687.46	1579.53	758.92	799.87	724.09	556.4	639.58	576.05	890.5	818.57	693.93	449.91	420.18	656.29	751.96	667.15	757.37	778.05	451.47	632.4	984.62	836.76
201200_at	CREG	3037.05	1253.36	2328.26	1984.52	1507.09	2150.86	1396.8	632.28	1302.63	1253.11	2609.65	1746.48	1491.74	1461.39	2758.83	1212.14	1825.3	1469.7	1150.6	2169.63	1001.08	1027.82	643.36	718.21	1219.53	2368.72	1256.73	962.34	769.69	1169.91	2415.03	1172.97	3932.55	1053.9	765.76	3282.58	1724.6	1427.46	544.95	1204.03	540.08	643.89	1342.91	2155.4	719.76	901.89	1431.75	799.07
201201_at	CSTB	4045.94	3030.89	2101.86	1690.8	4685.21	3423.18	1996.02	1974.68	1834.83	2823.08	3367.08	2727.98	2977.23	1233.22	3078.47	1608.63	3285.81	2415.6	2943.95	3341.37	2128.14	2572.93	2107.39	2056.75	3042.06	2391.64	3690.28	4248.9	1656.26	2199.35	4453.73	2483.78	3295.79	1964.95	1274.87	1599.89	2709.25	1763.02	696.43	4783.51	1475.13	1655.17	1528.31	1565.85	1578.41	2802.52	1637.75	4961.08
201202_at	PCNA	897.18	686.11	1669.82	1574.15	1058.96	1334.78	784.11	725.86	1427.39	1549.55	1084.44	673.55	1118.34	386.49	622.99	842.89	854.68	1324.37	825.97	583.22	2184.68	1584.17	1101.1	288.97	506.12	1083.94	1151.56	630.8	1043.72	1095.66	774.43	969.06	621.58	311.07	826.43	1323.42	851.13	1022.05	450.81	583.39	1771.83	1068.39	1374.87	884.3	1169.38	716.67	490.8	619.39
201204_s_at	RRBP1	584.77	1021.28	704.49	920.08	860.08	833.34	896.31	237.93	354.1	505.15	1123.19	1051.13	704.65	1001.46	780	884.44	927.11	925.24	854.11	562.2	1139.61	374.93	585.32	546.3	985.85	983.11	507.84	728.58	606.21	601.35	696.48	830.14	1505.94	709.05	490.09	900.81	858.99	679.91	388.52	1449.9	915.43	1608.19	696.44	630.84	690.01	623.84	428.69	807.6
201206_s_at	RRBP1	189.78	311.3	228.4	305.15	351.61	270.07	279.55	139.11	135.25	216.21	373.61	313.77	253.36	304.01	296.56	286.81	307.54	285.42	281.39	239.7	306.14	155.4	219.14	217.13	351.64	385.24	218.8	260.09	200.94	276.66	235.58	279.59	446.26	286.75	240.23	315.36	309.88	259.73	141.64	479.92	374.75	579.36	269.04	234.33	272.2	229.24	211.47	280.67
201207_at	TNFAIP1	236	157.85	146.92	186.47	179.56	349.34	136.2	335.52	198.82	157.85	164.43	146.32	235	257.36	282.65	156.1	170.42	192.38	208.46	198.65	248.33	260.64	260.83	236.43	163.82	266.89	227.27	406.79	394.91	128.33	340.16	276.1	323.52	354.75	216.96	144.82	466.74	371.26	118.59	181.75	151.98	290.49	258.39	308.59	156.89	753.33	192.16	258.76
201209_at	HDAC1	778.25	777.38	1206.29	924.31	623.45	1429.08	786.94	693.63	1054.85	714.27	633.07	549.6	1083.55	713.07	756.84	643.45	1028.29	793.8	1137.99	601.28	933.8	1171.47	780.38	792.91	682.02	583.18	667.19	476.18	629.01	709.21	634.38	934.92	636.25	587.63	658.48	905.11	771.4	793.46	845.85	897.11	1058.76	609.78	992.37	831.28	710.1	332.13	904.86	717.21
201210_at	DDX3X	1364.13	1535.86	1020.27	1578.67	1628.33	1468.15	1548.83	1160.48	1190.3	923.68	1566.51	1525.34	1282.3	1453.31	1390.8	1490.57	1283.79	1005.84	1053.57	1137.96	1698.22	2188.12	1111.88	1405.13	1308.03	967.27	1735.23	1239.06	1476.21	1144.46	1411.23	1349.49	1140.68	1383.07	1293.89	1247.59	1336.76	1150.14	1120.11	1427.32	1636.92	1828.02	1501.89	1434.56	1160.74	1323.14	1826.32	1381.84
201212_at	LGMN	657.86	463.93	350.29	511.41	1022.6	484.78	591.24	298.71	780.82	383.07	1732.96	516.64	394.86	1114.42	1411.6	1084.96	719.68	577.94	617.52	799.47	858.72	618	408.66	417.45	675.14	521.76	700.31	542.43	581.09	391.91	377.71	570.35	517.38	598.2	307.44	502.5	1051.87	537.61	101.3	790.99	479.26	531.83	859.4	624.3	527.88	485.21	853.68	736.47
201214_s_at	PPP1R7	257.67	262.16	208.81	503.83	189.54	303.52	297.61	351.78	339.3	159.8	343.67	237.79	327.72	194.72	348.19	366.96	254.72	404.65	233.72	199.82	277.51	327.58	188.67	230.54	326.43	428.65	364.09	410.93	265.82	258.51	338.82	183.83	201.97	247.2	245.03	368.58	238.01	279.48	415.76	227.4	169.29	315.98	356.16	358.28	367.13	398.13	453.17	380.51
201215_at	PLS3	939.96	578.09	672.11	695.01	564.49	1788.67	648.39	608.51	790.67	435.95	884.16	657.23	1068.14	1013.45	424.39	420.7	854.62	1178.02	441.84	689.74	1395.88	804.74	1109.44	1056.19	517.45	740.75	1339.1	1160.34	1713.24	1332.29	1043.72	1164.93	656.69	964.63	1043.15	634.23	1153.14	742.69	121.39	1341.67	575.23	1787.98	460.47	920.5	569.88	482.59	952.55	703.02
201216_at	C12orf8	1418.7	969.73	780.93	1075.83	816.21	1729.63	1111.9	949.72	696.94	724.55	829.65	1268.71	930.98	1068.06	1229.91	1055.6	1077.78	804.28	663.44	1395.66	1068.48	650.99	711.85	468.56	893.9	943.14	544.17	1194.07	794.59	1041.29	485.4	657.37	856.91	871.36	803.28	1114.67	783.46	1065	1055.03	1065.48	1182.41	652.19	840.52	861.53	786.1	1004.84	661.77	1266.22
201217_x_at	RPL3	8100.34	6271.48	10622.7	5082.16	5633.83	5836.69	5147.26	4898.57	6369.55	6409.75	4283.05	7062.42	6096.24	7691.01	5848.92	6518.56	6896.48	5075.59	5646.89	6484.81	6888.96	7671.82	6486.31	7658.04	5502.09	7317.68	4939.22	6020.29	3967.84	6770.89	4735.14	5115.01	7319.49	7823.41	6485.69	5466.29	6411.81	7151.82	6682.92	8632.9	6444.54	5258.52	6202.16	5335.59	8991.43	10958.2	5964.34	7680.03
201220_x_at	CTBP2	1469.48	1495.58	1187.15	960.06	825.94	1009.9	1083.04	2311.41	1092.02	1809.52	1524.62	2541.72	1850.63	1008.96	727.47	1092.28	1040.88	2049.59	1460.84	1500.72	1289.92	1496.54	2188.63	1103.85	2193.27	2522.19	1303.87	1190.91	1918.9	917	2125.58	1169.75	1596.91	1430.72	960.39	1034.64	1449.57	1627.35	553.26	1277.98	1033.99	877.84	945.32	1642.76	3224.88	2546.86	1164.01	3654.57
201221_s_at	SNRP70	485.67	803.04	854.48	696.64	653.59	472.16	780.89	560.31	505.53	321.32	528.27	522.63	555.42	984.21	570.14	560.19	463.76	431.21	511.5	529.39	585.03	550.28	412.54	464.28	557.01	463.13	288.69	662.36	492.84	687.08	420.09	671.25	412.92	806.25	755.31	463.63	620.74	973	908.91	472.78	820.9	592.67	378.36	431.75	333.29	313.51	351.47	453.37
201222_s_at	RAD23B	1212.59	1219.82	1353.28	1214.02	1520.12	1474.61	882.98	251.36	527.35	566.6	1330.4	1483.68	1185.15	747.18	1119.85	1266.22	1033.91	387.47	1843.59	1320.43	1742.71	1734.52	660.37	609.69	1190.37	298.02	531.54	2017.69	1426.33	1429.65	2163.67	1090.84	1375.3	950.53	990.73	1042.99	1029.66	1520.52	141.86	1080.87	1376.19	1712.32	1193.75	818.7	317	557.36	1373.23	1452.28
201223_s_at	RAD23B	622.8	422.27	781.2	430.74	702.31	573.34	362.8	275.18	510.36	477.53	533.62	549.38	438.18	323.24	596.42	497.75	501.22	674.94	712.83	485.68	701.71	672.41	520.72	508.43	767.73	358.76	521.33	903.68	650.24	520.35	921.55	417.79	564.91	413.71	467.06	417.87	394.3	655.97	187.81	518.71	312.2	613.37	514.05	336.14	324.51	732.68	704.08	416.19
201224_s_at	SRRM1	324.87	526.49	521.6	434.7	466.2	311.44	406.11	1098.25	601.28	984.65	319.39	455.31	540.72	386.4	426.75	431.13	507.9	856.66	573.35	381.51	533.12	408.62	919.99	604.04	787.03	394.46	384.75	275.75	328.92	368.05	243.58	539.21	368.37	389.98	418.85	395.8	432.83	274.9	525.47	347.23	957.73	406.33	299.26	372.35	455.95	323.74	233.2	344.65
201225_s_at	SRRM1	882.45	933.25	1235.04	1081.99	913.72	740.94	763.54	1011.72	865.03	1310.28	741.44	910.61	1443.77	722.31	981.44	1117.98	1159.01	1012.12	1044.23	844.33	1845.47	1206.82	1388.74	704.28	854.1	453.22	613.54	861.53	941.76	862.38	702.31	973.66	653.58	852.97	1072.43	973.21	953.17	625.25	614.5	1016.57	2899.14	884.36	832.71	1036.23	743.58	415.56	616.12	717.58
201226_at	NDUFB8	452.23	448.01	531.13	564.65	642.23	560.32	398.31	341.93	601.8	526.92	401.48	417.98	459.4	427.66	446.03	360.74	403.91	331.93	356.36	753.21	444.23	483.23	460.71	384.71	384.82	643.52	503.65	413.05	287.37	510.8	463.77	335.27	539.13	416.99	371.6	494.17	429.6	427.19	303.7	878.6	270	271.99	433.62	401.18	429.55	530.92	496.29	559.39
201227_s_at	NDUFB8	574.87	600.56	685.53	667.9	688.58	683.9	517.02	389.99	674.63	602.21	557.4	593.13	492.87	481.46	468.36	373.06	396.07	342.96	375.34	770.87	614.75	648.34	458.19	360.1	431.35	735.41	516.38	495.74	325.58	598.26	488.62	388.63	589.26	389.89	377.92	464.33	463.96	455.4	457.05	1227.45	277.11	298.83	557.64	510.99	458.3	580.05	537.77	531.77
201231_s_at	ENO1	1580.04	2954.58	2765.4	2952.54	3477.95	4685.26	2162.54	2639.43	1949.04	4093.14	2047.69	2331.32	2232.9	1618.14	2065.73	1682.72	2634.29	2941.25	3467.29	2293.87	4618.01	4964.16	4229.42	3059.69	3432.06	2107.4	3019.92	1568.05	1652.84	3411.53	3083.53	2673.61	1618.89	1597.28	3714.15	2475.53	2714.98	1860.29	1143.77	3485.91	4111.58	2536.6	1736.2	2114.81	2378.44	2424.41	2600.23	2665.19
201232_s_at	PSMD13	346.99	349.38	335.79	406.44	373.43	498.99	338.3	470.52	552.93	383.17	323.61	265.29	203.84	233.51	261.65	271.27	398.97	459.59	384.26	188.14	455.05	385.28	409.15	177.98	212.99	597.75	235.9	432.51	165.53	248.38	158.1	136.47	318.85	174.05	269.19	312.47	284.34	260.01	286.48	376.55	589.72	170.46	336.35	410.28	444.51	244.56	343.85	248.44
201234_at	ILK	427.62	436.29	321.65	418.99	380.83	387.28	352.56	526.27	440.15	334.69	420.46	397.98	546.64	598.92	563.33	396.31	442.2	334.78	448.66	388.34	361.37	349.08	441.08	411.1	412.51	554.81	406.37	503.82	289.17	418.92	375.69	421.89	514.75	673.56	512.76	543.36	575.11	617.03	269	320.91	764.14	767.23	335.84	257.18	258.74	366.15	502.41	489.88
201236_s_at	BTG2	300.7	563.47	208.44	548.45	228.47	279.3	641.58	365.55	366.7	253.67	450.04	557.54	140.07	647.29	540.13	545.18	455.64	161.01	359.43	207.58	385.8	122.87	207.65	218.38	322.49	192.29	250.67	224.5	512.82	344.08	134.08	340.67	331.33	826.3	319.28	570.5	288.28	1154.68	1465.04	280.92	874.76	205.3	477.42	437.56	328.78	319.19	314.28	745.65
201239_s_at	KIAA0102	715.83	866.6	613.57	699.04	697.4	1172.43	892.47	1024.91	665.81	1147.28	1086.51	815.68	1083.78	837.51	953.3	980.39	1097.04	653.99	902.91	1617.59	726.72	784.25	1057.56	663.02	762.85	908.89	1112.69	991	982.01	968.38	701	784.42	1000.93	798.71	850.23	1172.73	710.39	881.11	992.4	610.72	775.98	1518.89	1241.85	1001.43	1652.87	1003.44	1752.06	1406.15
201240_s_at	KIAA0102	1105.14	1420.01	1129.85	1245.68	845.11	1705.8	1645.07	1599.91	859.18	1284.66	1656.33	1436.08	1494.1	1196.38	1163.52	1458.08	1494.08	1138.27	1363.49	2011.62	1292.33	1159.19	1517.87	1186.44	1044.01	1545.46	1465.48	1541.84	2023.05	1533.6	1222.2	1283.61	1523.22	1313.33	1563.82	1888.9	989.56	1289.85	1599.01	857.68	1137.66	1914.79	1873.16	1499.11	2153.96	1622.44	2096.05	1990.99
201241_at	DDX1	1266.96	701.99	1052.88	666.94	957.91	890.07	405.7	908.83	757.44	727.2	650.17	715.21	801.82	412.56	673.36	771.09	1025.56	564	585.6	930.78	1230.34	681.99	511.9	746.72	428.17	932.72	705.13	628.07	545.56	371.49	699.84	713.95	1102.63	589.54	613.87	548.59	687.04	588.84	319.77	759.66	745.86	625.24	1052.79	433.17	860.6	612.59	599.3	652.06
201242_s_at	ATP1B1	1551.15	1653.19	1288.29	2350.43	390.47	602.83	1190.77	1308.42	629.02	1830.02	956.92	1160.83	830.25	379.16	233.26	188.04	880.06	2985.66	1173.14	569.82	271.73	152.23	1826.91	1292.88	2720.19	1367.78	1660.23	425.43	2567.63	1225.07	405.05	767.04	2037.12	1484.16	1540.37	1147.44	483.85	2304.75	434.82	1343.07	539.34	881.6	1187.26	931.27	2686	2214.22	1476.21	785.85
201244_s_at	RAF1	343.8	363.89	452.9	368.8	600.52	454.81	480.36	416.71	286.54	444.93	334.54	477.95	411.72	416.65	475.41	790.48	281.14	401.57	349.45	383.75	674.39	506.68	317.06	308.23	294.58	268.48	275.81	279.72	345.86	758.02	403.69	475.29	343.1	353.24	263.62	322.92	387.01	543.64	276.94	366.72	739.74	529.48	263.93	492.64	444.49	464.64	352.38	297.88
201245_s_at	OTUB1	371.99	271.04	228.5	272.02	334.22	409.1	340.49	192.16	266.02	194.6	280.09	308.29	297.77	275.94	307.76	272.05	295.51	134.88	230.4	211.44	150.76	176.13	226.84	261.29	178.94	237.76	195.51	218.08	169.36	258.81	141.51	342.69	322.47	222.16	232.8	268.24	284.6	203.38	158.76	193.56	364.34	159.83	226.2	483.38	189.7	141.91	312.97	406.12
201251_at	PKM2	1882.06	1803.55	1660.26	2447.18	1843.89	1940.26	1393.3	2802.52	1362.08	1755.94	1230.04	1491.54	3879.36	1379.66	2422.87	1461.34	1450.58	1152.55	2418.44	1727.09	1300.98	1148	1377.21	1467.03	1325.58	963.88	2040.87	985.44	1968.79	2562.8	1744.92	2736.73	1262.14	1338.79	2631.34	2732.89	2035.2	1599.07	630.19	895.66	2309.07	2469.1	1184.06	1122.28	944.42	5357.92	1309.44	1845.14
201252_at	PSMC4	463.84	281.81	320.8	448.17	517.54	733.62	410.19	575.19	419.45	352.94	570.71	267.86	427.22	259.43	1317.41	482.02	393.66	400.62	519.38	471.23	401.77	360.66	218.47	226.66	440.2	336.86	310	249.68	504.18	382.32	366.85	332.11	225.63	250.5	337.84	260.88	321.94	386.79	279.12	401.48	418.59	386.16	400.5	564.81	287.61	193.05	414.27	260.24
201253_s_at	CDIPT	729.84	811.9	1137.74	908.28	506.12	967.01	945.26	980.91	522.86	651.69	931.19	1017.71	878.7	1100.05	918.69	704.55	645.57	883.5	824.08	672.7	523.53	635.2	761.21	815.41	594.26	960.1	609.85	1082.66	923.9	858.6	969.56	802.76	1474.61	798.95	553.02	672.47	901.02	1178.99	443.01	703.63	507.11	1022.85	938.54	662.66	1026.21	901.87	1607.13	564.72
201254_x_at	RPS6	7535.61	4943.27	12840.7	4002.08	6850.01	7432.75	6128.81	4114.72	6526.18	3777.2	4052.37	5033.61	4372.54	5032.52	5897.4	5329.52	5819.52	1765.56	3552.11	6155.86	7381.18	5527.07	5047.47	3152.03	4829.96	5013.27	2654.1	2774.28	2699.29	3990.33	5466.94	5552.17	6697.62	4446.58	3009.6	4204.79	4920.1	3961.21	5714.99	6556.68	4218.97	3004.34	4213.01	6675.75	4797.77	7725.1	2879.86	4275.88
201255_x_at	BAT3	459.92	683.73	680.77	455.46	918.31	686.64	692.94	976.15	410.92	433.44	448.85	644.29	810.65	553.35	849.72	655.25	740.87	597.88	591.49	531.41	754.8	843.71	616.14	803.46	763.03	551.61	398.03	462.07	1069.51	570.63	646.49	876.18	683.11	503.61	641.12	621.23	1159.95	695.49	547.66	391.57	1157.71	667.09	629.91	527.5	542.1	415.44	374.8	455.95
201256_at	COX7A2L	626.11	230.89	326.97	502.05	452.96	612.19	199.98	308.75	304.23	293.81	292.41	296.55	235.33	270.37	348.9	335.34	377.7	323.49	327.22	574.19	316.91	194.11	223.54	248.37	240.96	385.01	317.3	398.42	234.2	190.09	356.98	373.24	328.96	223.35	238.18	403.94	189.57	176.96	265.51	463.2	210.41	222.94	252.95	329.69	462.2	428.53	262.96	307.22
201257_x_at	RPS3A	4066.21	3010.91	4913.32	2967.99	3149.67	3397.04	2598.32	2199.93	5905.69	3001.7	3626.74	3595.22	1573.7	4595.09	2632.06	2916.89	3103.3	1865.72	2979.27	4871.53	3726.07	3202.18	2971.19	2679.89	2287.19	4227.44	2579.42	3550.26	1309.25	3124.62	4140.01	3058.41	3779.84	3014.9	3350.63	3404.92	2760.95	3511.45	4659.16	4987.43	2450.57	724.98	3817.34	3123.12	4053.75	6017.87	2260.36	2851.33
201258_at	RPS16	3234.04	3277.87	5612.75	2613.57	2646.23	5204.29	3069.45	4049.63	5448.99	2935.5	2784.96	2711.81	3466.21	3126.04	7418.48	2917.27	3957.51	2310.86	2852.54	4810.9	3247.58	3092.03	2678.73	2273.64	3887.23	4644.33	2628.19	2719.55	4724.52	3241.89	2558.01	3967.09	2303.42	2458.46	2069.98	1786.28	2998.89	2348.89	4645.25	3043.5	3145.78	2824.88	3177.51	3397.85	3895.89	3910.12	2119.87	3234.27
201259_s_at	SYPL	575.36	220.24	299.44	380.19	245	673.22	139.15	299.54	226.28	510.23	356.4	140.98	556.61	279.8	390.26	353.17	530.01	220.58	331.66	362.7	261.34	324.99	339.41	529.85	216.58	239.11	492.47	288.82	397.62	460.58	421.87	648.3	438.57	492.43	403.82	689.04	536.37	504.57	271.55	888.48	180.57	744.62	576.41	450.8	620.69	394.78	629.36	632.86
201260_s_at	SYPL	675.4	295.15	574.94	502.08	191.81	884.53	226.17	316.21	318.12	567.41	471.4	208.42	501.15	349.39	278.22	388.5	502.81	385.79	351.9	316.63	530.86	470.36	399.5	689.35	329.99	380.46	539.72	444.29	583.34	502.46	440.88	605.32	385.98	453.35	337.52	606.15	431.81	461.51	435.05	1200.38	156.4	709.02	621.97	606.55	912.24	572.33	578.83	546.17
201261_x_at	BGN	246.28	735.35	489.59	610.59	322.37	466.12	444.89	282.52	439.73	327.79	588.13	638.02	1278.19	1731.78	516.07	317.36	549.96	856.81	397.22	477.57	869.36	321.2	897.81	1279.9	563.16	656.79	775.26	895.94	510.3	965.28	979.76	990.16	880.1	861.32	1355.91	366.22	1260.13	1168.89	265.18	617.95	357.39	1776.17	592.07	523.54	361.51	779.89	846.53	390.83
201263_at	TARS	642.14	451.34	671.91	642.81	525.95	1449.72	412.39	830.81	584.6	751.61	487.29	1218.5	482.54	298.25	451.84	571.83	1135.22	1024.91	451.87	642.82	1094.1	667.96	824.27	1101.24	465.15	1023.81	587.98	726.92	1209.76	774.77	894.34	440.92	427.41	443.7	529.43	548.25	792.43	608.81	581.91	469.15	743.28	440.67	534.95	580.64	896.55	658.32	793.68	464.31
201264_at	COPE	553.18	750.23	422.87	586	639.99	429.5	466.89	652.72	560.85	407.51	346.82	378.29	700.77	477.83	513.85	557.07	270.28	422.67	771.22	533.8	417.31	492.97	384.96	695.13	444.4	422.23	555.89	529.02	275.1	437.67	377.32	583.8	343.54	393.54	376.93	628.55	459.67	465.65	248.32	440.3	697.73	532.38	442.73	916.81	849.49	525.54	456.46	780.83
201266_at	TXNRD1	412.05	333.89	495.42	417.81	552.91	503.2	256.58	522.43	341.15	1253.8	524.47	575.62	727.55	368.33	504.02	479.01	505.66	445.58	539.96	816.02	707.95	487.13	423.63	736.44	391.45	330.61	313.4	575.57	604.2	622.02	447.9	628.15	280.83	292.49	351.47	429.55	377.42	596.34	248.84	398.49	576.54	456.47	463.01	355.24	309.47	426.49	853.95	424.38
201267_s_at	PSMC3	424.78	283.13	226.93	300.14	601.73	416.16	216.68	493.88	445.51	471.27	302.9	365.43	506.1	227.55	379.99	383.34	360.66	423.64	470.3	320.77	298.86	497.12	579.95	304.25	248.16	485.33	287.41	254.25	233.42	410.14	220.93	327.33	250.54	229.74	389.79	397.25	340.23	418.31	105.66	284.33	454.69	216.9	500.39	630.57	425.27	236.51	521.21	348.55
201268_at	NME2	2507.23	1861.8	1692.93	1279.44	2352.99	3027.41	1262.48	1495.62	2284.23	975.75	820.35	1282.01	1001.46	1174.39	1216.07	1235.61	2523.99	856.13	1325.27	1917.19	1632.79	2182.17	1625.59	772.76	2151.26	1969.97	1332.59	928.69	552.73	2335.15	1450.55	1429.57	1098.02	775.22	1410.75	2316.35	1101.54	1151.66	993.19	1997.42	1209.77	586.51	1837.6	2718.1	2182.03	2124.43	1167.36	1895.46
201270_x_at	KIAA1068	231.95	290.53	360.33	404.34	269.06	190.29	260.2	397.14	336.56	194.81	257.88	303.53	291.49	331.06	263.32	340.51	398.28	476.49	243.5	256.2	331.81	242.58	318.09	315.16	397.27	301.74	345.27	337.41	268.81	202.6	375.66	333.54	397.62	349.26	363.86	179.82	370.58	414.48	286.76	243.83	217.39	245.17	359.42	461.99	243.83	308.19	280.07	261.11
201271_s_at	RALY	278.71	410.13	437.67	266.39	446.29	519.12	380.11	398.2	229.1	224.18	282.67	253.55	266.91	269.94	287.44	291.12	465.99	224.69	469.92	356.96	380.67	339.59	318.12	372.85	310.84	296.75	245.1	301.2	607.4	315.03	267.51	452.46	272.94	269.33	301.14	449.76	381.96	252.61	201.17	335.43	530.5	239.11	301.85	263.65	281.91	277.24	311.67	398.04
201273_s_at	SRP9	2108.67	1813.84	1322.84	2809.58	1633.64	2536.86	1494.79	1328.45	1278.08	1487.54	1951.23	2459.17	1529.3	1186.97	1517.92	1844.08	2049.08	1709.99	1623.69	1035.93	1702.77	2291.01	2232.31	1211.89	1540.9	2460.17	1437.01	2327.19	1756.02	1739.86	1822.58	1661.9	2388.27	1612.96	1889.63	2346.17	1387.3	2231.93	557.71	2407.8	1913.26	1386.45	2490.17	2794.71	3264.74	2151.76	2482.1	2324.95
201274_at	PSMA5	994.17	607.47	649.69	899.09	1439.29	1141.65	938.83	780.96	1593.75	1075.44	916.05	486.72	785.82	355.58	803.99	778.79	857.54	388.62	544.41	793.4	676.05	603.07	628.35	425.16	350.4	703.68	678.59	800.78	287.5	716.44	628.59	396.94	491.76	276.01	472.32	622	690.97	366.87	281.04	697.81	379.52	284.23	811.43	977.41	814.19	726.54	482.72	503.63
201275_at	FDPS	621.33	606.57	450.71	441.97	697.72	550.37	454.93	694.24	881.69	516.93	322.55	310.54	594.25	277.03	489.41	1276.66	397.67	582.93	564.51	473.76	887.84	614.33	571.87	594.54	522.98	489.02	3097.51	433.26	423.77	445.34	728.69	386.74	450.23	383.98	527.84	614.95	448.74	363.45	258.66	567.18	607.24	454.78	352	492.56	396.63	448.6	360.52	325.76
201276_at	RAB5B	328.22	206.61	250.86	301.2	286.29	360.06	281.62	181.99	172.61	103.73	226.77	468.14	245.15	296.01	341.62	247.94	224.97	261.24	123.27	285.42	234.5	261.1	248.13	230.65	234.08	184.38	232.3	486.53	317.58	181.24	406.74	287.84	275.21	361.31	395.67	191.95	404.62	362.91	227.14	205.01	371.92	259.55	237.2	197.44	301.69	247.98	707.4	326.53
201277_s_at	HNRPAB	1611.85	2980.6	2541.26	1948.15	1868.79	2284.91	1995.15	2557.3	3439.58	2214.23	1295.93	2800.47	1725.64	1323.83	1879.26	2343.9	1612.42	2119.22	2197.15	2824.7	1864.16	2211.26	1889.6	2181.61	2148.02	1248.49	3414.01	2144.79	1601.57	1443.81	2794.54	2037.52	1939.1	2106.45	2402.1	1664.18	3659.7	1838.99	1207.17	1787.42	2707.88	1676.15	1908.53	1283.31	1589.98	2181.92	2382.14	1384.8
201281_at	ADRM1	419.89	464.38	444.94	479.92	484.31	562.01	365.91	662.03	503.06	439.01	349.22	319.27	396.43	304.08	336.31	466.47	575.68	352.93	847.38	400.13	402.93	326.55	362.55	442.39	519.54	381.81	577.05	457.27	287.84	348	399.58	729.96	428.63	281.48	362.16	363.7	453.51	274.06	217.16	425.74	569.59	299.53	300.41	434.49	502.99	298.49	305.78	436.03
201282_at	OGDH	211.14	177.47	229.48	320.23	229.24	196.61	190.65	167.42	221.38	110.34	236.3	255.37	263.69	182.79	257.92	278.44	266.84	192.91	197.61	275.81	258.28	126.81	262.77	260.39	315.69	200.58	149.81	202.75	258.66	208.29	167.21	313.33	316.23	307.07	278.94	215.8	360.59	247.75	183.9	148.39	220.24	194.28	328.04	249.15	168.37	153.5	202.12	302.1
201285_at	MKRN1	983.1	360.28	579.34	460.35	776.24	602.48	513.8	439.69	555.63	1035.43	571.54	708.51	922.6	450.71	635.95	625.8	613.93	721.15	460.65	1052.96	617.16	428.4	674.26	635.06	679.57	480.52	396.4	424.78	786.45	824.35	545.79	624.36	537.06	586.23	466.07	476.48	709.2	447.49	558.63	969.94	387.19	736.1	842.9	1202.21	797.72	460.84	472.8	691.61
201288_at	ARHGDIB	1198.56	1116.52	625.55	686.9	850.22	915.63	1367.89	661.65	1348.87	583.17	1880.27	960.35	901.6	1363.13	1396.67	1081.01	1381.6	664.96	735.04	879.46	708.23	415.5	587.23	350.59	914.08	844.71	1091.08	1168.21	640.82	1076.75	380.56	639.76	1010.91	1109.91	653.28	1288.58	1282.87	629.75	2116.65	660.78	341.47	481	1263.13	236.67	339.42	780.2	2097.71	679.59
201289_at	CYR61	723.95	1672.99	568.99	562.97	466.76	468.51	1306.4	351.1	385.5	323.43	1090.45	801.64	1390.26	1247.33	500.09	482.46	1128.87	816.97	871.55	661.64	567.34	419.16	718.81	1333.08	758.83	730.24	951.9	533.54	469.01	665.93	456.45	1135.73	935	2501.84	768.42	350.62	1112.64	735.56	317.17	1312.65	457.42	1284.38	265.52	1354.94	251.24	522.74	703.57	489.17
201290_at	SPC18	1567.84	800.04	768.06	1716.42	1025.08	1159.27	1557.8	1711.34	1252.95	949.7	1546.14	839.56	1099.18	1123.85	1183.75	845.16	763.99	1134.58	734.08	3076.93	1658.44	801.98	1435.03	819.17	1061.69	1185.27	1296.74	1096.5	996.04	1575.35	1205.34	1533.45	1344.01	1048.19	955.57	2092.07	1065.42	1092.36	1257.21	1249.3	525.25	681.7	2158.92	813.16	2385.07	1288.19	844.49	1060.53
201293_x_at	PPIA	4382.38	3485.58	5065.34	8044.17	5558.9	4544.45	3530.33	6254.5	6714.87	4253.72	4125.07	4443.52	5051.38	3567.44	4739.29	5355.2	4652.58	5560.99	4424.34	5874.8	5349.89	4309.57	6416.24	3719.46	4794.89	5109.89	6310.48	4721.41	3883.56	4062.63	7083.61	4587.67	6499.86	4582.09	6257.06	4800.05	4947.4	5451.82	2798.34	5307	3508.48	3275.34	6880.31	7510.06	6392.01	5030.53	4941.75	6999.3
201296_s_at	WSB1	669.3	829.49	447.29	685.84	327.24	354.4	854.19	366.54	649.12	508.13	931.2	530.28	513.07	1370.12	336.94	603.55	480.21	836.47	474.3	376.25	574.52	885.9	776.48	653.84	556.81	853.71	961.07	1226.17	1230.04	552.78	627.28	701.54	481.5	1230.23	751.02	699.06	675.87	733.43	1270.92	543.36	762.33	932.77	441.56	1129.48	414.89	800.66	587.61	751.3
201301_s_at	ANXA4	1196.38	475.81	812.1	688.43	549.92	993.69	373.21	499.03	846.72	444	810.4	572.86	447.17	403.97	937.19	854.56	828.43	830.52	326.67	657.99	720.21	372.83	413.84	519.51	381.06	586.46	768.6	955.86	766.58	534.55	660.08	740.4	792.72	481.31	432.51	470.2	725.76	406.1	106.25	908.11	514.4	535.92	788.75	587.39	437.11	686.98	524.5	401.55
201302_at	ANXA4	1113.89	289.06	556.62	429.99	337.67	438.92	285.62	282.62	516.05	295.91	547.31	563.66	341.62	302.91	754.07	465.6	490.61	836.55	240.61	345.58	663.51	219.03	289.33	390.18	306.31	452.35	499.84	913.72	756.08	357.69	525.35	571.22	660.81	434.58	360.24	294.97	480.65	349.16	132.4	702.32	258.33	381.4	644.26	365.63	267.33	544.23	389.88	262.75
201303_at	DDX48	548.74	754.41	503.16	1356.71	1016.96	924	580.43	876.44	656.28	1232.95	542.84	460.76	738.38	376	601.25	922.67	893.27	874.19	1223.61	907.51	812.79	1182.67	1251.6	587.86	682.97	596.51	545.97	515.21	1320.07	745	2601.18	637.53	502.6	543.94	434.82	1367.98	844.58	357.79	305.9	830.93	598.53	758.23	1015.27	890.79	461.34	739.76	582.87	955.79
201304_at	NDUFA5	438.21	179.54	471.98	247.48	135.75	410.14	259.9	164.08	268.94	294.68	385.66	210.36	197.54	238.87	131.06	217.63	220.68	278.11	114.66	158.25	469.5	316.4	266.27	383.56	236.8	327.45	170.35	258.62	280.98	362.88	461.55	144.89	301.68	227.79	237.15	269.14	192.13	348.29	135.28	614.29	126.41	157.46	461.97	442.49	692.4	325.29	316.59	324.03
201305_x_at	ANP32B	1368.29	1267.05	1682.78	905.11	1776.7	965.11	1648.46	1823.58	1830.55	1284.09	1291	1636.28	1078.51	1098.18	1137.73	1225.15	1164.62	2031.85	1973.43	1106.66	1683.06	1632.11	2124.64	1680.99	2369.03	767.22	1016.48	880.39	991.78	1591.97	1193.3	1198.9	1116.23	1105.86	1125.93	961.27	1173.67	1352.04	2344.13	1268.09	1567.22	1572.29	803.49	1261.55	1070.53	1462.2	767.76	822.05
201306_s_at	ANP32B	2611.23	2368.29	2944.19	2127.57	3446.8	1884.64	2760.54	2879.39	3289.2	2167.22	2435.27	2949.25	2415.67	1785.59	2460.62	2319.22	2123.95	3990.63	4513.98	2619.38	3339.38	3873.93	3823.14	3160.93	3378.87	1659.12	1917.37	1736.92	1998.24	3737.62	2525.11	2132.61	2100.72	2151.4	2830	2015.74	2005.88	2432.76	3725.96	2631	2966.31	2991.8	1763.45	2325.77	1520.22	2609.77	1768.81	2043.14
201307_at	FLJ10849	674.23	385.25	345.36	488.94	581.09	346.62	306.86	318.82	328.69	459.58	438.1	369.01	720.74	505.78	426.34	584.46	289	456.61	418.13	533.31	536.78	559.74	512.86	478.17	392.82	418.44	527.45	564.23	702.24	562.54	495.83	917.97	473.57	687.21	737.03	633.4	801.67	462.04	281.13	614.53	242.03	1022.41	401.41	572.66	244.57	599.11	745.31	525.6
201312_s_at	SH3BGRL	1668.35	874.88	639.58	1267.83	655.21	1019.65	1084.59	741.56	940.99	416.51	1761.74	1414.97	1308.3	1718.81	1210.79	1020.55	969.53	1236.91	648.35	1040.1	753.45	992.4	894.72	739.25	659.9	1218.79	821.37	2164.52	1036.91	1168.58	1260.17	670.83	1301.71	1444.98	1109.27	1189.22	1108.34	1372.68	918.3	1546.55	829.32	959.42	3038.4	1088.04	1080.6	2358.13	2645.83	1781.49
201315_x_at	IFITM3	1992.28	2469.66	1207.45	2150.92	2313.9	1089.93	2215.87	2083.53	2203.15	1958.59	2239.46	1431.36	928.7	2984.3	3144.66	2261.01	2705.25	3146.61	3529.98	1878.74	2355.04	2665.36	2173.37	1328.86	2117.28	3415.81	2032.32	1048.84	983.19	1866.9	1595.1	1808.27	2757.68	2868.68	1790.71	4392.36	3143.2	2536.09	936.23	1650.89	2015.49	1807.28	2246.98	2682.02	3641.14	1208.56	1885.94	3771.18
201317_s_at	PSMA2	515.04	283.22	361.75	1102.25	603.03	677.16	271.24	350.72	831.77	481.34	597.86	493.53	425.26	315.87	458.45	537.29	556	335.62	229.35	695.66	479.55	347.42	392.52	178.66	560.42	596.73	563.99	576.01	295.29	255.91	769.65	292.54	507.11	286.93	393.29	486.2	314.71	319.88	278.13	532.92	186.39	115.2	846.98	803.28	613.33	611.31	499.83	608.55
201318_s_at	MRCL3	2411.23	1779.21	1764.6	1472.76	1497.78	2752.59	1741.92	1236.1	2207.48	1860.92	2566.9	2398.89	4666.44	1839.32	2785.95	1737.5	2279.81	2077.39	2008.38	2400.6	1593.43	1695.14	1898.84	1514.25	1834.66	2043.78	2145.24	2827.92	1946.86	2517.47	2079.66	2258.91	2423.65	1967.1	1723.03	1748.54	2749.74	1631.95	1346.41	1912.25	733.23	3248.04	2539.69	3017.99	1336.78	2038.41	1658.64	1498.67
201319_at	MRCL3	693.2	606.44	671.38	494.22	584.36	772.7	637.62	386.56	840.74	690.87	986.92	899.47	1490.89	626.55	999.23	587.65	720.18	665.04	771.95	758.52	620.8	558.66	707.61	428.19	754.25	658.51	712.48	948.95	681.79	884.27	660.51	685.78	709.87	647.08	519.75	559.54	896.17	527.08	587.2	737.03	180.03	1179.07	885.93	961.22	356.62	643.12	646.2	472.67
201321_s_at	SMARCC2	289.88	342.78	243.98	329.6	307.37	261.66	357.28	438.14	233.53	213.69	249.9	612.8	224.75	294.91	309.38	333.31	309.86	248.69	291.31	298.4	229.34	197.48	268.5	421.75	364.54	190.86	235.86	293.04	350.44	163.94	335.81	404.26	215.72	327.2	295.74	201.03	324.5	429.97	426.28	228.52	847.13	240.98	234.41	279.21	331.76	263.24	209.49	267.31
201322_at	ATP5B	1872.94	1276.5	2112.55	1524.32	1405.77	2489.78	1275.15	1033.11	1606.88	1445.81	1209.6	1857.99	1110.62	1039.83	1637.7	1697.26	1767.97	1106.6	1374.08	1502.22	1361.41	1659.71	1525.8	2303.03	1223.46	1089.02	1204.06	1432.56	1110.78	1148.28	1882.77	1519.85	1387.83	1574.14	1485.75	1041.57	1649.4	1358.31	936.64	1575.09	2437.06	1108.47	1218.17	1546.45	2067.46	1447	1485.4	1643.96
201326_at	CCT6A	393.8	443.51	975.25	568.42	507.8	749.25	503.45	407.01	826.14	403.65	522.56	513.95	398.37	290.25	426.42	802.22	532.65	659.52	719.97	183.06	1173.78	528.61	743.95	514.04	549.39	569.87	1430.79	414.29	566.11	268.48	1235.33	446.88	449.33	367.42	426.34	187.96	579.44	371.88	307.28	1264.17	358.25	300.06	893.58	613.03	630.35	534.48	362.44	346.84
201327_s_at	CCT6A	408.02	508.82	994.9	943.92	608.65	1093.13	485.13	752.78	1033.63	622.12	552.7	565.42	531.84	316.6	370.07	824.34	814.87	658.98	894.76	250.47	1087.97	660.78	876.45	540.85	497.48	753.12	1587.7	312.74	605.98	326.23	1012.68	521.97	640.13	388.83	323.75	321.06	770.98	404.4	318.52	1181.64	541.87	502.85	1036.04	771.55	790.87	554.83	434.73	485.28
201330_at	RARS	539.43	442.68	535.13	554.28	494.25	476.81	399.69	333.62	487.4	535.97	433.61	497.42	414.15	364.39	561.83	515.86	425.12	430.25	436.46	613.72	513.18	443.56	383.04	369.45	327.33	341.39	577.99	395.59	323.55	467.68	461.56	447.16	400.49	348.84	509.52	435.61	600.14	501.87	355.8	433.18	379.45	439.58	464.77	268.99	403.66	483.76	642.88	379.12
201331_s_at	STAT6	422.6	498.26	250.19	568.27	336.06	419.44	527.2	119.75	365.48	237.7	421.22	563.81	254.96	623.94	443.16	425.96	479.53	347.49	477.02	622.65	265.24	279.31	301.31	270.51	381.71	291.69	327.15	376.96	319.68	294.12	118.36	327.86	335.45	553.75	425.49	262.84	491.62	406.08	659.66	399.8	467.26	276.14	245.14	328.25	204.21	354.6	314.25	501.15
201334_s_at	ARHGEF12	442.24	603.4	922.24	621.17	440.66	1154.14	642.98	477.94	467.28	453.59	636.29	864.81	1114.24	869.49	647.89	761.7	681.96	685.02	714.91	893.03	544.6	767.03	904.11	919.18	752.42	974.86	774.18	1137.63	1953	971.57	844.51	726.99	857.69	1177.88	833.47	759.2	1462.61	994.22	324.84	541.56	531.53	733.08	1538.6	983.88	1576.48	868.93	949.04	868.2
201336_at	VAMP3	1232.39	983.16	673.3	1362.72	1210.52	1276.56	949.13	796.25	957.72	917.4	1100.66	1048.73	724.78	1158.55	1313.73	865.42	843.27	1003.1	1238.92	877.54	1124.7	1127.93	1288.84	1106.58	1056.48	850.34	1364.95	1210.2	719.6	1081.26	903.94	966.36	1338.99	1319.33	1097.95	906.61	1357.52	955.02	602.24	1146.22	733.52	971.97	1409.31	679.47	966.68	673.87	1262.13	944.69
201338_x_at	GTF3A	1289.9	1805.18	2773.27	3216.06	1497.33	1008.07	1120.82	1045.44	1516.64	1164.78	1493.38	1563.2	750.61	1103.47	1146.02	1113.97	1613.12	709.33	783.69	906.89	1220.22	933.39	1030.01	1747.43	658.17	1316.1	1053.75	1986.63	996.71	763.42	890.85	1947.12	1745.51	775.96	837.72	1793.33	1153.16	627.83	1313.63	1188.1	683.02	506.98	1260.25	1143.82	897.71	1379.26	974.37	467.45
201339_s_at	SCP2	625.16	375.13	492.68	549.07	493.44	648.87	468.56	530.83	485.54	471.26	783.46	522.06	752.17	485.01	395.18	453	391.87	420.1	237.79	509.59	504.87	676.44	475.46	312.27	657.42	610.81	531.92	1086.36	803.25	584.34	638.15	887.94	607.89	682.3	445.75	1050.04	528.38	512.09	265.39	659.91	442.01	608.51	1123.44	771.62	605.22	587.68	847.55	549.23
201341_at	ENC1	317.32	550.38	238.65	239.39	293.87	154.32	465.04	153.36	234.55	181.89	434.81	402.34	528.51	779.27	525.78	509.53	319.75	581.47	337.13	307.04	182.82	211.43	368.29	557.89	500.8	420.7	409.95	390.69	3753.3	818.07	281.37	505.9	332.69	669.83	2426.09	403.66	348.68	341.26	141.16	213.63	694.39	957.44	726.12	450.88	434.71	427.4	384.02	299.02
201342_at	SNRPC	546.54	636.9	601.11	504.76	608.99	881.72	528.9	510.67	418.45	471.13	431.44	438.54	517.9	324.1	675.49	540.89	523.18	471.57	399.5	529.99	739.43	1033.42	500.9	341.57	616.83	459.61	415.92	452.12	423.46	583.57	368.34	362.24	422.65	265.22	454.05	509.8	615.71	369.74	296.58	529.38	592.09	435.52	405.08	449.52	624.29	430.15	419.51	434.82
201343_at	UBE2D2	340.77	335.48	422.49	336.82	382.28	581.64	359.62	308.92	252.91	331.02	364.24	249.87	290.93	281.81	429.44	381.33	407.98	350.81	291.24	355.56	467.61	659.22	314.14	227.58	310.87	283.36	391.65	308.04	399.79	291.11	454.86	285.87	273.49	249.2	328.66	419.64	326.26	311.5	433.97	414	369.85	431.17	319.98	353.55	294.05	432.14	371.29	295.54
201345_s_at	UBE2D2	484.54	661.47	488.4	424.29	518.4	580.99	433.59	389.4	451.34	542.27	468.76	340.15	413.64	455.66	623.52	492.35	439.78	466.27	433.17	683.46	410.87	828.73	481.3	341.79	459.95	302.25	732.47	495.36	374.37	490.47	768.1	396.02	346.6	442.46	562.01	729.61	508.59	409.75	632.71	478.47	581.45	486.66	474.16	623.81	385.22	510.16	756.34	400.94
201346_at	ADIPOR2	333.25	343.99	460.85	407.12	283.7	1107.25	331.05	596.95	550.06	603.51	349.27	297.96	570.35	217.55	357.7	254.2	553.48	545.81	327.26	672.93	378.72	402.59	681.12	294.41	416.96	154.61	264.6	492.45	298.72	364.75	210.41	272.56	353.49	296.72	370.05	273.25	330.96	200.98	199.45	244.63	503.44	288.77	306.54	369.13	323.67	319.68	1265.92	536.4
201347_x_at	GRHPR	330.03	228.51	600.87	276.35	361.57	419.28	262.09	376.67	364.72	239.71	183.18	182.03	377.49	191.35	494.62	293.73	302.5	365.25	299.09	317.85	414.77	270.54	365.4	233.31	293.73	187.16	176.72	636.13	193.9	483.17	493.34	208.14	323.67	228.4	202.05	277.94	311.16	258.34	242.3	546.37	246.75	391.31	333.06	531.87	366.42	376.43	228.98	244.33
201349_at	SLC9A3R1	302.5	403.33	254.71	392.19	325.19	288.77	342.61	178	158.66	264.97	260.63	284.58	536.21	254.27	542.54	539.47	345.79	446.14	599.51	362.7	230.08	187.16	224.85	170.5	318.61	294.88	1446.68	826.25	1389.69	354.13	3387.35	666.67	281.44	493.12	167.88	463.73	428.73	356.79	250.44	591.92	196.42	379.66	584.12	258.71	855.39	914.52	917.49	1314.24
201351_s_at	YME1L1	891.36	871.31	561.14	1581.49	1384.35	999.65	590.68	1416.68	1003.48	1109.28	878.75	1004.26	918.69	524.98	1526.04	1331.16	1348.19	955.8	1984.08	1311.96	880.05	1053.35	768.87	881.96	916.6	784.1	1645.82	1106.64	970.39	1148.32	1321.84	808.32	1393.56	529.35	372.39	910.61	774.46	605.87	465.45	1179.41	650.99	611.88	1175.04	834.95	922.53	710.32	905.06	1235.8
201352_at	YME1L1	1150.55	895.25	938.81	1712.77	986.71	971.44	746.37	1264.17	803.15	746.67	883.15	958.07	917.56	818.95	1613.93	1408.53	1402.97	1185.48	2299.18	1168.21	1205.24	1038.59	956.69	997.9	827.58	1075.4	1422.53	1656.85	1387.16	1191.11	1744.02	831.37	1417.07	856.48	609.81	836.09	916.46	816.15	556.92	1389.67	544.05	907.31	1335.55	1022.45	1036.94	851.73	1061.01	1143.67
201353_s_at	BAZ2A	175.92	249.3	178.62	142.47	172.24	203.45	221.39	322.52	263.47	266.23	221.8	234.13	120.55	222.22	166.82	252.9	211.5	247.71	246.77	245.51	166.12	141.36	235.22	326.25	395.11	202.67	251	190.16	189.03	160.7	221.75	175.81	150.3	223.3	142.64	119.59	254.24	248.9	569.33	137.32	336.85	204.14	168.86	152.94	304.16	290.4	205.72	225.92
201354_s_at	BAZ2A	167.2	226.25	187.3	171.13	207.77	192.95	244.14	169.7	168.13	187.2	171.67	270.39	155.76	200.4	212.59	239.93	243	154.43	235.33	245.18	212.25	156.4	167.97	215.66	217.75	154.22	160.64	212.24	211.09	161.7	246.7	181.8	206.58	186.79	146.14	173.27	188.46	205.11	223.44	173.69	226.09	155.36	164.87	135.77	174.89	223.47	189.53	266.2
201356_at	SF3A1	308.45	369.3	366.79	311.57	362.96	375.69	332.33	676.89	458.48	331.47	363.07	376.91	415.57	316.91	355.48	551.87	372.27	287.01	562.46	399.14	618.58	457.53	467.4	427.82	309.81	284.06	266.83	214.33	333.17	431.35	230.47	440.98	197.48	378.36	404.01	381.7	342.26	436.47	399.66	340.89	426.29	446.83	309	345.44	397.81	281.46	579.16	403.96
201358_s_at	COPB	2277.59	1081.68	1035.39	1778.72	678.26	1476.7	1195.61	2558.96	1288.08	1314.93	1811.72	1403.78	1632.19	1241.61	1061.78	1547.12	1400.25	2008.09	913.71	860.8	1476.84	1881.26	1783.05	1223.12	1094.99	1826.76	1272.91	1218.46	1231.78	1266.23	1258.36	2834.42	2149.08	982.03	1032.78	1405	1038.36	1473.99	1235.32	1039.02	1683.57	2376.2	1754.31	1881.28	2282.49	1008.91	2247.33	1388.03
201359_at	COPB	1423.9	520.39	567.25	1002.64	694.34	884.84	565.83	1502.37	735.33	788.06	1141.37	788.83	1006.56	717.41	998.83	915.05	922.92	1241.95	505.04	592.38	843.1	1123.78	1109.03	700.88	618.79	1070.42	824.49	711.64	643.39	766	686.59	1755.28	1267.33	607.44	722.45	952.46	740.2	881.81	560.11	610.8	1111.75	1604.67	942.02	1128.25	1394.43	584.9	1310.62	923.44
201360_at	CST3	1544.67	960.46	525.84	883.24	1031.93	762.72	1126.87	1266.38	967.4	330.59	1584.67	964.67	1401.39	1494.44	1898.58	1278.04	433.39	733.46	757.54	1330.93	808.33	534.89	734.51	543.24	720.33	454.97	740.57	726.16	967.95	1623.2	449.79	727.43	711.82	2701.57	1865.9	1730.77	1898.6	1751.96	364.52	641.27	2104.76	773.63	1248.41	332.05	1076.43	540.96	1092.22	1021.5
201361_at	MGC5508	615.71	431.89	382.97	343.59	359.46	275.26	391.3	567.49	344.87	305.61	471.27	665.19	580.64	429.22	518.19	422.11	501.43	416.78	693.21	552.87	574.09	251.91	464.35	473.75	432.12	558.47	433.54	461.39	494.1	399.48	228.37	850.74	591.99	493.18	405.71	688.19	545.35	529.02	351.03	356.69	346.19	1063.05	419.28	350.02	370.07	258.95	301.39	353.24
201363_s_at	IVNS1ABP	356.94	269.4	272.19	478.13	217.27	256.5	332.55	143.23	312.72	277.42	355.95	350.75	256.39	435.88	214.79	239.57	368.71	500.72	326.23	265.84	382.01	449.38	307.85	365.94	245.83	293.96	192.18	237.57	702.43	264.75	398.69	336.27	413.7	264.93	469.2	280.48	215.52	283.64	341.47	257.49	427.3	326.35	319.12	188.45	101.34	160.84	250.57	218.36
201364_s_at	OAZ2	348.96	196.09	321.42	404.68	287.59	368.9	181.39	284.38	238.71	283.31	288.23	296.08	413.29	347.64	332.77	260.06	214.94	165.85	170.87	262.44	268.22	303.26	129.67	228.14	224.16	162.53	281.99	203.82	185.28	330.19	297.26	196.63	236.6	373.62	335.32	296.8	334.18	260.4	111.44	311.21	239.21	233.34	317.77	295.22	239.45	176.63	250.75	307.06
201365_at	OAZ2	293.1	233.19	337.69	318.52	197.23	256.62	205.78	255.46	173.87	182.11	232.89	286.03	301.85	346.79	288.03	235.9	143.31	164.96	138.14	211.51	299.31	284.49	147.73	237.19	228.15	185.84	234.77	195.27	158.7	258.31	238.61	194.32	250.54	354.79	290.1	239.22	263.7	280.64	144.85	307.62	193.87	211.79	235.8	283.5	193.85	167.26	195.63	229.69
201366_at	ANXA7	1034.99	604.91	564.85	1166.18	396.86	968.82	862.73	401.11	567.47	845.56	942.47	690.59	827.28	527.93	510.92	548.89	822.17	693.9	523.34	483.44	812.33	794.35	571.05	457.52	560.3	819.49	704.97	816.3	699.59	821.71	491.75	713.46	590.79	605.36	418.49	575.74	460.28	581.16	531.84	714.8	193.6	408.52	808.95	534.48	552.52	513.31	1051.46	767.11
201368_at	ZFP36L2	1518	2428.73	1208.49	2686.3	2310.15	614.06	1846.53	653.57	1530.36	1471.31	2131.47	993.28	1516.78	1869.13	1406.3	1382.51	2143.56	1870.67	2027.06	2283.52	1336.59	2307.41	1549.77	1078.35	2024.87	1988.91	1528.24	1460.05	914.63	1155.6	1847.11	1436.6	1329.46	2739.65	2302.14	1353.52	1451.4	2261.99	1471.84	1102.05	609.15	1923.66	1240.18	2081.73	832.14	966.84	996.76	1689.6
201369_s_at	ZFP36L2	389.48	697.48	350.21	720.28	1025.2	157.97	560.17	245.68	399.44	355.18	470.69	328.68	356.16	789.96	429.08	434.15	593.8	433.25	622.65	802.19	404.65	520.66	387.72	299.65	704.2	725	297.77	369.35	175.99	258.31	346.82	511.36	391.21	829.93	631.54	393.27	473.63	814.92	642.72	224.42	267.75	483.43	179.09	562.34	207.47	259.3	148.84	416.41
201371_s_at	CUL3	588.66	538.15	614.49	715.66	368.52	660.28	569.32	692.1	663.64	902.26	837.94	650.39	800.5	547.76	560.01	958.9	612.12	504.71	536.12	734.16	579.54	749.92	663.12	592.94	471.1	672.36	699.1	799.26	741.21	876.12	821.77	865.61	459.99	784.46	773.85	712.26	521.25	507.38	768.32	598.11	1201.64	833.43	956.53	604.55	805.27	749.73	1091.77	732.67
201373_at	PLEC1	140.84	309.96	220.39	187.16	225.75	134.52	243.32	245.47	145.53	157.83	184.82	219.16	579.61	239.03	265.38	375.21	246.64	164.25	565.72	223.98	169.72	163.45	191.44	294.85	172	189.96	199.21	243.63	150.69	235.02	204.22	491.85	259.93	250.19	243.63	277.85	302.85	407.45	116.63	235.09	117	332.89	164.03	162.2	225.48	141.52	215.56	215.8
201375_s_at	PPP2CB	623.32	884.34	440.5	755.52	514.51	690.76	509.74	496.94	470.01	873.46	1029.86	673.83	1400.57	647.1	634.05	392.02	692.71	610.09	955.1	546.17	394.13	1941.11	466.79	740.53	602.21	824.43	628.77	676.86	744.65	578.07	807.42	806.68	1027.72	931.75	726.35	758.25	568.16	734.88	193.48	483.63	529.91	1342.46	595.42	376.16	426.84	465.3	759.73	852.46
201376_s_at	HNRPF	680.33	642.38	436.93	620.14	943.83	501.37	615.39	578.79	548.55	550.82	423.94	491.46	488.66	366.27	474.13	1057.91	785.09	424.85	779.75	444.65	595.75	751.59	568.61	387.42	734.68	540.31	673.76	461.33	785.82	604.88	367.57	826.91	565.75	454.49	332.41	386.22	585.07	570.34	437.38	477.36	583.59	245.46	639.57	595.1	474.91	616.15	624.12	682.32
201377_at	NICE-4	321.64	515.06	262.88	381.9	589.62	438.75	406.86	528.75	321.42	424.05	222.44	527.15	320.17	178.25	274.26	842.5	469.97	577.97	401.33	633.77	362.01	231.05	281.66	262.63	368.22	162.56	255.51	127.8	401.78	353.11	598.69	236.8	298.37	222.07	552.77	253.4	364.93	185.54	246.52	225.56	543.38	427.48	273.37	292.64	370.94	264.73	207.87	610.97
201378_s_at	NICE-4	566.94	855.72	470.9	694.06	1301.99	559.59	672.72	627.42	461.66	697.55	386	724.29	581.25	351.37	681.05	1639.46	967.66	660.77	665.22	856.59	518.32	559.21	450.68	403.79	575.57	231.85	445.25	293.61	616.8	642.05	946.39	558.24	681.48	526.31	952.06	504.61	723.6	512.69	201.11	405.32	889.02	768.03	441.71	503.72	542.22	377.3	466.71	1104.19
201379_s_at	TPD52L2	500.07	523.4	532.94	507.99	452.63	463.79	353.3	605.29	471.49	415.33	301.31	167.12	362.44	386.79	547.84	456.93	770.69	494.53	709.81	511.36	491.67	413.49	387.06	335.31	393.92	409.5	695.41	357.63	295.04	356.26	596.01	275	463.47	344.83	378.52	321.13	412.28	418.67	167.03	507.31	530.39	337.22	342.91	399.29	545.7	339.72	368.42	495.82
201381_x_at	SIP	642.27	1036.55	573.22	558.52	868.34	661.3	776.24	210.87	518.45	807.35	368.02	395.82	252.05	196.75	548.52	301.8	925.65	521.67	641.09	578.67	820.81	877.88	474.74	278.35	512.74	690.94	569.99	386.43	347.23	232.5	1372.26	297.73	524.34	232.89	277.7	324.69	269.64	306.04	220.3	792.7	521.2	173.68	431.76	414.71	680.7	353.57	415.12	332.63
201384_s_at	M17S2	537.87	438.16	313.84	333.26	351.66	270.73	496.85	513.28	431.41	252.28	626	432.87	361.15	629.98	436.86	337.83	226.69	395.04	343.24	383.8	525.47	801.01	515.08	287.89	336.34	546.84	407.77	455.07	524.28	692.09	545.8	880.61	372.32	508.29	514.05	380.77	459.68	849.28	476.69	358.19	384.29	339.65	681.54	741.03	524.6	278.91	749.82	610.92
201385_at	DHX15	1190.05	929.69	1200.78	966.51	1258.37	1248.92	1248.82	1875.61	1235.87	1192.85	1128.54	1392.7	1788.93	896.69	1042.05	976.48	1189.66	1242.13	822.33	885.52	1377.86	2095.71	1351.15	881.94	873.4	947.37	1026.72	999.65	1227.79	1340.2	1298.16	1210.12	945.9	1152.63	1719.32	1258.54	1031.13	976.19	929.95	1520.63	1412.54	1011.3	1624.58	1395.19	929.13	870.8	1513.25	1135.14
201386_s_at	DHX15	698.78	503.8	664.43	508.19	827.68	723.6	760.37	1139.53	754.8	790.19	627.63	851.78	1238.56	540.05	627.76	612.2	690.33	750.35	512.28	584.52	642.69	1100.49	836.22	543.56	547.23	515.49	658.86	559.21	714.15	801.61	828.56	711.67	596.2	840.49	1285.24	788.56	671.75	596.89	298.72	812.47	973.19	638.96	982.74	782.32	482.09	468.89	1042.72	753.97
201388_at	PSMD3	520.44	361.06	480.08	544.67	668.87	545.81	443.67	290.37	328.75	369.9	310.37	365.36	383.03	258.92	335.36	534.06	356.06	285.37	472.22	527.34	427.79	742.55	811.53	264.69	456.37	416.9	2993.41	360.83	1546	238.63	445.83	908.58	303.87	382.18	427.01	350.81	635.69	294.63	151.87	362.46	316.3	337.08	668.35	664.73	507.79	1720.41	930.55	465.35
201390_s_at	CSNK2B	1120.49	1271.33	1163.83	962.72	1814.5	1618.79	1041.22	1817.08	782.95	1065.47	892.45	1239.89	1424.66	801.91	1482.25	1360.4	1225.85	1202.51	1136.99	1123.7	1096.15	1930.55	862.85	957.43	1648.73	1055.45	857.57	1057.85	1645.36	1106.76	986.19	1160.31	1369.55	814.55	1082.02	1078.61	2460.26	1006.78	731.33	993.97	1956.6	1666.58	955.28	1080.95	1015.54	1016.81	971.89	1089.25
201391_at	TRAP1	421.64	568.42	853.23	480.07	540.05	993.23	389.21	455.73	634.83	995.06	271.99	549.69	364.07	279.18	178.2	583.57	549.78	372.11	1083.43	529.31	623.62	511.57	534.34	510.17	804.82	772.11	301.28	343	395.23	566.17	341.57	344.48	416.2	231.1	461.28	287.43	420.01	220.21	272.31	539.3	406.5	249.44	443.34	648.53	430.6	534.42	546.96	583.3
201393_s_at	IGF2R	294.96	475.29	413.12	313.65	472.39	486.75	415.09	229.23	473.93	347.53	754.91	555.6	679.48	494.32	631.49	456.23	680.49	351.96	516.35	370.91	482.17	656.69	519.43	422.28	514.68	630.83	488.53	688.31	771.36	429.77	549.32	697.25	523.3	518.45	491.6	409.43	491.22	350.49	261.26	496.82	631.64	773.96	510.92	337.92	377.1	502.07	374.52	588.83
201394_s_at	RBM5	265.34	420.89	250.47	410.1	341.88	157.15	470.61	210.02	365.39	232.81	372.51	377.85	267.56	739.25	413.51	338.14	212.61	276.74	260.71	250.54	324.91	452.37	395.9	324.67	320.72	189.27	273.87	280.39	294.73	276.38	432.02	315.91	323.91	692.51	394	297.15	378.98	651.73	613.56	291.42	327.28	269.29	306.66	334.82	338.77	249.26	259.7	364.26
201395_at	RBM5	467.73	803.89	534.09	768.7	665.19	381.2	909.92	458.89	654.37	399.88	753.09	745.16	502.75	1344.08	894.14	619.08	429.72	542.5	524.21	465.48	680.95	768.91	667.56	546.19	565.32	428.17	476.11	578.37	631.12	547.49	770.21	612.26	603.35	1073.65	641.12	555.39	718.13	1156.98	1078.67	536.61	632.38	500.33	541.63	636.9	586.21	449.05	433.71	587.89
201396_s_at	SGTA	162.81	194.39	231.03	149.89	208.22	153.46	170.88	180.46	182.5	103.78	123.67	149.47	137.09	151.79	149.6	211.76	194.69	126.84	198.64	126.48	133.25	134.58	135.81	199.73	130.82	153.44	168.07	186.1	147.37	148.84	177.23	171.06	155.69	174.74	179.19	108.88	235.67	158.98	117.46	154.46	167.53	169.25	187.74	205.33	127.62	176.33	149.2	167.47
201398_s_at	TRAM1	1718.39	1429.96	1157.45	1224.02	1002.38	1282.93	1424.3	1391.4	837.91	1416.95	1683.87	1213.12	1458.95	1527.66	1150.61	1421.72	1527.28	1242.26	1248.03	968.64	2308.57	2522.55	1377.62	1053.63	897.04	1166.66	1361.06	2264.82	1202.77	1223.36	2633.09	958.24	1713.17	1230.17	1016.47	1526.66	1223.65	1550.27	1152.88	2797.9	414.43	1613.55	1645.78	1444.32	1197.76	1259.8	2112.49	1579.61
201399_s_at	TRAM1	929.36	738.54	634.47	735.24	1218.67	1493.28	648.93	837.53	677.77	1130.49	936.2	698.2	1234.19	864.28	1197.18	742.24	1431.58	597.21	735.53	907.98	820.1	1366.27	904.31	486.46	679.11	520.98	1069.4	1304.8	602.33	780.13	2169.14	633	1167.28	771.6	509.25	1167.23	1175.19	910.46	329.82	1854.23	498.17	1232.85	1202.16	1283.55	731.27	574.63	1495.96	1616.24
201400_at	PSMB3	1152.49	771.75	643.96	1369.64	1351.56	1341.36	722.87	490.1	894.8	820.68	605.49	442.13	515.7	601.15	790.26	742.34	631.68	571.57	652.9	955.47	964.01	1054.13	878.62	359.43	694.04	1260.76	846.75	5645.17	2825.43	790.63	741.62	2256.34	453.37	1030.67	830.57	927.06	1070.49	632.89	373.25	886.66	258.22	299.3	2243.07	2398.98	1055.82	1364.28	1796.57	923.64
201403_s_at	MGST3	1550.08	909.07	1231.54	1487.49	1553.57	747.76	692.87	1134.45	792.52	805.86	940.84	759.08	653.07	477.42	1308.04	353.19	1129.93	599.96	427.47	1728.49	653.63	1033.81	918.82	772.21	610.17	1527.56	842.85	926.98	1465.1	521.51	2273.27	1180.28	1904.25	744.64	908.63	1854.06	1243.2	970.28	221.69	1653.94	379.25	465.61	537.6	1355.39	2671.71	1612.21	773.67	1887.16
201405_s_at	COPS6	424.34	326.82	433.06	461.53	317.61	626.87	291.01	648.86	419.48	568.33	285.45	223.19	283.65	285.76	303.04	406.79	412.66	368.54	226.88	348.84	439.37	260.15	233.61	759.26	256.49	445.35	557.65	443.33	361.9	451.01	446.97	353.13	335.79	298.29	346.73	253.09	495.11	442.87	239.69	536.19	311.05	248.02	281.19	422.58	896.1	456.2	359.9	485.93
201406_at	RPL36AL	5562.44	3325.21	7059.02	4694.98	2701.73	5628.44	3518.52	3850.94	3820.53	2531.27	3684.85	6039.53	3318.28	3359.78	3534.97	4721.16	7475.05	2107.11	1803.39	4227.91	4538.5	5334.37	3424	3649.12	2518.64	4998.9	3591.11	4203.36	2311.6	4222.4	4969.81	5497.46	6820.34	4042.35	3846.31	3699.84	5057.44	4848.33	4460.29	6852.75	5587.9	1997.72	4605.26	5967.85	6079.6	6391.54	3251.87	5474.29
201409_s_at	PPP1CB	713.08	449.1	430.17	338.46	337.43	525.35	237.87	681.39	213.24	359.97	458.81	727.19	396.18	320.45	400.85	483.52	289.45	496.91	313.82	364.51	434.3	437.68	419.52	329.81	418.21	679.31	354.59	346.88	402.36	398.04	463.06	675.43	544.7	248.67	248.58	380.49	315.2	294.9	173.26	845.24	125.66	343.97	786.86	266.65	296.97	419.65	407.47	302.3
201410_at	PLEKHB2	633.97	301.58	368.01	439.31	555.98	435.76	316.98	399.93	480.76	478.97	717.39	353.08	403.58	383.39	882.9	497.77	427.24	580.76	797.71	390.51	635.27	378.66	588.07	693.5	299.17	401.32	531.61	583.7	626.6	543.6	497.77	380.18	411.98	453.07	324.52	444.61	541.92	428.6	330.83	912.35	290.68	775.54	674.02	451.8	606.75	332.59	947.05	564.07
201412_at	LRP10	577.5	847.84	349.15	613.83	902.46	401.98	566.47	528.9	571.49	455.84	931.76	587.89	828.41	842.64	841.04	684.83	438.52	442.37	1035.11	910.94	383.2	392.81	425.68	640.36	1032.23	642.84	754.71	721.74	675.56	586.88	756.73	743.14	812.95	1145.89	453.73	823.98	1080.47	1684.42	642.65	520.91	352.9	1429.73	789.17	583.01	562.97	809.98	1160.76	717
201414_s_at	NAP1L4	255.09	363.89	396.8	256.18	301.46	230.98	341.72	394.95	345.88	342.42	242.8	234.56	242.45	311.18	375.19	344.23	375.52	311.19	257.86	195.42	434.43	414.77	418.4	300.3	407.06	434.29	247.88	272.01	273.11	241.95	217.14	264.6	281.01	270.15	489.58	328.02	300.78	362.65	274.42	284.22	1009.24	264.61	298.99	305.94	428.87	203.98	381.83	433.55
201416_at	SOX4	755.21	1165.89	885.26	1162.76	1164.16	897.71	781.28	560.69	424.08	732.98	771.7	1207.41	637.25	628.24	292.36	869.89	1033.59	1815.19	604.61	831.89	1036.2	795.91	1123.92	1966.37	1382.21	1087.87	549.16	835.13	2205.46	626.83	455.25	734.08	1082.3	645.95	1272.27	548.43	879.41	800.92	177.38	650.65	2072.81	993.41	818.49	1202.42	1112.37	794.07	362.44	856.87
201417_at	SOX4	2207.43	2609.9	2205.95	3178.99	2988.18	2128.58	1737.66	1431.08	1170.94	1821.39	2199.1	3579.64	2248.6	1503.03	949.95	2536.55	2796.69	3631.92	1668.47	1823.35	2957.52	2259.09	2961.07	3862.42	3090.84	2163.43	1420.78	2217.82	7036.01	1948.55	1535.35	2264.53	2368.49	1717.02	4072.4	1567.22	2339.11	2253.71	346.32	1873.37	4312.81	3360.61	2695.58	2782.65	2566.74	1747.81	1636.89	2221.49
201418_s_at	SOX4	392.15	652.91	415.1	608.03	650.25	410.14	496.76	464.45	297.36	465.97	360.93	731.67	397.6	413.52	226.69	552.01	573.78	1274.29	318.83	493.04	567.15	361.29	865.6	1128.9	987.57	556.95	350.17	416.91	1098.8	355.76	312.52	486.75	532.05	425.36	888.3	359.15	506.56	509.69	168.72	372.3	1204.96	464.79	369.28	610.14	736.8	485	227.76	485.65
201422_at	IFI30	3059.02	3695.99	1185.86	2625.74	3563.03	1579.99	3476.24	2027.2	4518.77	2443.08	4001.18	2518.69	1703.76	2592.96	4753.44	3907.86	2393.03	2565.1	3411.8	3818.58	2090.66	1466.82	1351.48	2050.57	2555.24	1308.7	2528.14	1698.93	1579.26	3784.54	1309.37	1941.16	1370.69	600.79	1507.62	2022.69	3495.14	1788.6	1548.66	2538.4	941.33	1692.27	3724.24	1559.1	1287.25	1097.35	2148.23	2849.48
201426_s_at	VIM	3533.64	5745.2	4090.02	5434	4872.2	2079.26	3593	7023.72	5651.54	3855.5	6041.34	6610.83	9784.4	6415.13	5655.1	3814.4	5096.38	6986.17	9291.04	5711.36	5830.05	5704.73	5362.07	6490.81	6224.16	6762.02	4984.68	5147.62	4162.46	6959.26	4307.23	7434.73	4752.54	8656.68	6672.92	7170.74	7499.91	6034.12	3676.42	6938.78	3574.03	10776.9	4321.71	1792.2	2688.89	3594.77	6096.08	4420.96
201429_s_at	RPL37A	10731.7	10368.6	12747.1	9083.7	9325.63	10753.5	11439.7	12424.1	12461.3	11337.2	9807.65	11016.2	12801.7	10617.6	10568.1	11872.3	11807.7	10655.8	8368.69	11585	10809.4	12429.8	12702.4	10685.1	10369.6	13826.2	9483.86	11020.4	9769.51	11143.7	10298	9823.22	9558.68	11606	11404.4	8665.15	9477.77	11415.7	12018.1	11698.8	13015.7	9963.2	11733.7	13627.9	14643.8	14066.6	11429.9	11539.3
201433_s_at	PTDSS1	861.12	1043.98	1830.54	752.61	907.74	1673.47	844.9	988.95	867.52	2766.16	781.9	775.34	835.58	520.78	848.06	1184.77	1530.9	918.97	1554.24	1683.74	1912.98	1521.57	1193.58	759.09	902.99	699.1	775.21	721.74	961.1	1291.48	1326.14	482.84	971.38	531.64	744.46	539.12	1127.91	476.26	880.31	1699.48	719.73	502.64	1617.1	1225.22	593.95	804.3	1074.6	517.78
201434_at	TTC1	257.94	273.5	320.98	271.06	221.31	282.86	270.64	221.96	253.14	192.39	268.42	267.75	176.51	243.69	326.26	224.22	195.94	256.69	169.43	500.24	188.34	299.45	218.36	134.39	270.33	261.37	254.02	327.83	125.93	208.48	250.63	172.11	222.05	186.14	227.7	283.7	233.74	256.45	306.43	201.72	120.8	160	195.7	158.19	142.54	280.51	215.07	176.56
201438_at	COL6A3	1364.28	2687.66	2627.19	2970.31	1194.31	1332.09	1681.47	1256.5	1835.88	642.75	4462.96	1667.54	3667.31	4187.05	2168.28	1707.95	1944.57	2437.93	1630.32	1750.92	2637.86	1128.11	3310.04	3672.91	1881.22	2050.72	3793.24	4235.5	3141.23	2568.28	2148.81	3437.27	3656.5	4453.26	4595.25	2147.09	4357.5	4237.09	592.68	1806.62	1016.13	5664.54	2654.75	1004.1	1595.62	2714.96	3855.04	1681.75
201440_at	DDX23	192.35	209.02	146.25	177.21	200.72	311.87	219.81	151.34	174.42	178.87	186.54	213.66	165.03	181.52	267.39	239.59	186.27	159.88	166.87	136.19	180.47	206.94	321.7	137.24	193.89	120.57	183.77	228.05	203.91	206.24	187.49	218.73	141.41	250.47	219.48	149.26	333.53	202.03	190.39	145.93	200.07	151.04	283.29	233.83	233.9	247.7	204.79	191.32
201441_at	COX6B	790.1	592.36	1067.53	1204	984.71	1826.6	744.52	908.07	1012.57	641.52	734.22	494.55	676.59	604.76	960.4	744.5	660.58	1008.8	640.92	1014.08	738.68	656.3	844.06	532.42	818.81	963.43	644.42	1006.42	1054.74	817.47	756.42	631.95	564.07	560.99	632.35	565.56	742.77	729.86	656.1	975.11	433.72	485.86	720.13	1309.86	1516.64	727.85	821.31	792.7
201443_s_at	ATP6AP2	1470.71	1541.75	1060.84	1511.57	946.48	1538.04	1330.21	1106.22	899.19	577.24	2103.58	1397.51	1246.83	1115.24	810.62	1355.41	1003.67	1034.86	671.76	1280.99	794.54	1137.33	682.24	813.86	1038.52	1160.05	1075.28	1515	1445.5	1171.54	1419.49	1172.65	1275.35	958.81	782.44	1032.23	1019.26	1365.95	490.73	1624.03	846.07	1198.48	1159.36	1936.66	1210.03	952.57	1331.57	1200.29
201444_s_at	ATP6AP2	694.45	623.24	369.66	690.23	739.11	813.8	510.08	498.66	444.04	352.31	851.3	593.78	654.81	460.38	599.56	514.26	519.33	512.11	313.93	1012.79	314.48	548.16	288.28	395.14	565.56	547.25	600.24	696.84	487.21	586.27	718.07	599.16	791.39	565.24	468.88	578.92	739.35	647.28	146.96	754.07	458.66	566.34	518.48	878.77	562.03	394.33	631.36	722.82
201446_s_at	TIA1	374.88	427.14	379.28	683.64	497.46	395.83	514.78	736.23	347.66	515.05	605.36	630.44	438.17	599.17	421.87	441.52	462.07	806.73	429.5	285.07	469.89	335.2	405.16	417.66	370.76	358.97	457.6	382.8	916.92	462.34	441.01	621.07	629.57	597.71	693.29	435.82	389.85	389.03	298.13	335.81	866.29	509.36	944.12	732.58	381.95	352.37	318.59	594.42
201448_at	TIA1	444.33	390.86	517.43	380.41	218.18	307.99	532.19	467.81	209.43	268.49	549.3	675.61	345.99	567.99	254.08	380.43	245.65	713.21	270.24	119.88	701.96	392.55	376.83	363.53	275.41	336.08	310.69	385.93	869.26	306.56	266.37	570.17	459.6	532.74	443.14	304.98	260.77	334.18	232.88	415.39	252.57	331.2	819.75	616.11	307.61	386.95	264.18	281.95
201450_s_at	TIA1	348.61	379.49	416.65	608.87	264.21	510.46	493.16	624.14	293.4	410.41	571.95	609.66	382.76	511.16	360.69	397.68	344.57	682.94	347.07	156.23	585.03	311.34	359.49	378.07	315.31	325.73	393.34	356.56	1081.05	422.53	348.96	509.23	333.07	436.29	445.08	296.69	264.19	304.97	224.91	368.26	617.06	453.43	815.6	757.79	357.34	260.83	277.52	374.04
201453_x_at	RHEB	1929.83	819.62	1505.73	1067.42	1298.47	1564.83	857.05	897.63	993.45	1725.85	965.44	961.35	1368.97	623.26	1180.85	1228.59	1577.26	832.32	441.2	2523.29	1311.18	1020.58	1061.78	1393.38	921.33	1180.31	1145.59	792.06	938.7	1021.09	1238.52	1256.76	1387.02	743.77	949.47	803.17	1473.31	890.52	292.64	1726.83	721.3	1840.84	717.02	2035.16	1926.86	772.7	659.01	1118.13
201454_s_at	NPEPPS	258.22	206.51	266.84	278.62	342.95	492.29	227.48	672.18	475.03	280.39	182.58	185.71	227.6	224.3	278.75	224.67	280.1	246.99	186.77	291.32	247.91	399.54	880.55	204.12	281.72	469.73	337.36	145.75	212.31	261.14	352.77	521.33	191.54	276.39	336.26	309.02	264.57	390.04	312.09	249.14	491.46	269.97	316.05	290.67	819.34	237.4	328.28	922.68
201455_s_at	NPEPPS	393.28	276.8	338.87	358.42	228.98	515.06	292.94	468.25	303.84	189.2	251.86	279.6	300.52	370.21	258.42	300.24	222.41	245.42	265.99	298.49	435.37	521.47	628.12	204.99	213.86	359.5	260.59	242.85	313.42	312.07	478.22	682.22	311.51	429.1	385.71	375.11	244.94	573.7	251	351.33	454.84	334.08	323.87	300.63	527.17	244.4	349.55	892.86
201457_x_at	BUB3	890.96	456.68	772.86	568.61	489.56	788.34	775.01	334.72	796.61	711.84	827.15	697.56	1256.72	339.92	471.84	789.29	596.95	326.47	508.8	585.12	756.02	847.98	603.03	270.83	482.71	556.52	443.2	689.07	699.67	635.96	445.96	333.79	574.51	470.3	440.73	551.7	659.76	830.3	510.83	534.51	894.4	364.21	641.16	580.64	1308.07	656.24	820.71	1220.72
201458_s_at	BUB3	711.92	342.47	984.21	413.71	368.58	587.45	759.59	262.6	406.15	428.34	731.07	797.24	906.2	354.57	336.86	592.16	416.93	324.79	309.18	411.37	1159.56	721.32	526.88	206.28	305.41	403.27	198.91	635.81	644.02	547.91	359.64	281.18	332.22	421.57	322.81	361.79	345.75	658.88	363.92	514.53	486.28	368.29	458.71	463.01	983.08	329.53	607.83	916.15
201459_at	RUVBL2	524.27	627.24	746.62	800.22	744.47	846.9	484.28	705.6	727.72	723.44	346.04	312.37	689.17	254.25	499.94	542.5	524.25	479.19	658.33	949.72	706.67	774.22	394.82	411.16	585.75	566.6	391.66	574.76	510.22	984.12	610.88	336.98	272.96	332.86	467.04	328.71	432.5	408.11	237.3	866.82	679.86	629.37	377.34	531.48	570.65	314.94	691.26	396.68
201460_at	MAPKAPK2	358.7	308.97	292.58	326.21	441.81	509.54	310.83	256.89	265.88	407.23	271.44	403.83	244.99	390.39	369.78	400.42	472.49	331.57	529.85	284.16	297.98	246.21	242.41	308.78	314.97	330.4	312.59	353.09	344.64	257.46	271.71	321.06	615.92	281.49	449.78	474.97	355.1	351.16	339.39	273.94	390.07	603.2	221.22	260.11	536.6	390	198.01	433.64
201463_s_at	TALDO1	1455.99	1359.61	1847.37	1721.6	1486.47	1385.47	1326.45	1492.86	2048.58	1918.53	1233.86	1147.5	1375.95	975.65	1778.96	1428.67	1624.81	2595.51	1636.5	1407.11	1423.9	1755.37	1875.02	1751.4	891.65	2338.81	1369.39	1512.35	1238.44	1118.24	735.2	623.33	1803.14	767.88	1295.02	1303.99	1543.57	1273.62	803.42	1770.75	2326.18	1074.33	1394.08	1424.83	1724.4	879.54	1850.44	1568.95
201464_x_at	JUN	540.84	2153.55	1472.16	871.59	830.05	538.25	971.53	447.47	782.83	800.85	1037.8	1076.81	1176.5	657.55	604.95	864.79	966.25	676.35	1620.95	810.25	1047.49	1150.67	992.78	962.95	2020.7	662.23	873.15	525.59	864.92	650.33	988.29	1612.45	489.53	1981.82	881.52	2061.81	912.5	1610.3	626.04	1605.18	2288.27	1414.29	508.53	2065.19	383.25	778.56	1222.55	1373.61
201470_at	GSTO1	767.16	472.68	467.03	740.55	847.79	620.36	431.91	494.15	911.77	612.03	873.44	509.46	493.24	599.04	743.33	413.38	657.29	395.92	453.99	961.01	275.31	620.76	491.11	402.94	318.08	607.91	605.55	752.89	258.47	654.69	481.05	336.48	571.1	327.54	460.39	517.25	584.75	609.89	272.06	522.76	274.27	337.05	545.31	402.63	591.37	623.93	462.28	292.02
201471_s_at	SQSTM1	1174.02	946.51	702.58	1068.76	852.18	559.05	1122.51	832.6	773.93	1248.14	865.65	1638.21	676.6	834.42	1222.98	1268.12	1270.98	853.96	1341.74	2420.02	662.26	645.37	634.34	564.05	1283.54	603.24	807.08	823.95	619.02	628.74	1226.67	1394.71	644.08	998.17	920.03	800.47	1202.3	1410.39	580.52	553.4	431.03	721.43	608.59	1467.2	545.77	802.32	1304.87	838.32
201472_at	VBP1	583.24	349.38	309.85	825.95	388.34	573.12	336.82	262.39	468.75	405.52	580.93	510.86	365.04	191.79	388.97	433.89	491.63	383.2	180.01	567.19	512.8	441.11	286.02	207.13	220.23	407.26	366.86	435.01	180.31	592.02	943.71	403.66	863.48	248.75	353.71	703.14	362.87	314.54	301	712.64	480.28	223.33	294.34	737.01	714.51	300.57	715.8	364.49
201473_at	JUNB	461.11	1011.55	359.49	447.9	585.13	531.8	499.36	435.08	602.81	509.08	558.65	633.33	417.52	757	445.48	722.43	770.85	535.92	676.62	501.62	456.18	301.36	433.68	681.18	498.58	389.92	464.9	371.48	256.53	467.14	288.66	572.72	464.01	834.17	561.72	580.69	538.49	1750.02	333.13	558.96	494.84	369.6	362.6	879.95	407.72	517.75	300.82	524.99
201475_x_at	MARS	590.65	314.51	393.6	553.25	474.53	454.37	380.93	280.35	451.31	350.89	314.21	780.12	864.09	341.09	439.29	552.29	746.42	329.71	452.75	543.55	418.4	353.13	379.07	278.37	749.25	252.92	454.24	416.05	394.96	508.05	464.58	368.24	344.62	352.5	401.55	297.73	601.39	427.05	321.46	264.62	611.07	422.64	408.51	519.02	504.19	342.74	1495.38	445.06
201477_s_at	RRM1	386.64	611.03	387.56	406.66	497.24	559.84	645.27	1114.7	776.59	604.95	366.39	432.5	400.95	290.02	561.92	686.48	471.66	859.48	438.31	210.63	1012.86	1639.29	708.53	429.51	576.63	887.23	320.69	330.1	542.43	449.11	424.01	494.42	385.4	190.13	627.9	658.65	522.14	725.75	654.66	265.28	1939.05	577.83	518.95	643.09	544.81	326.89	535.19	404.77
201478_s_at	DKC1	450.63	519.24	868.65	616.95	674.78	740.25	602.63	403.31	650.19	1493.3	328.21	385.48	580.09	200.95	421.24	676.74	829.57	503.88	372.13	798.67	975.19	595.92	617.79	473.05	440.88	401.93	451.8	294.43	296.55	650.8	458.02	306.71	611.57	283.58	391.42	324.27	506.19	234.59	266.38	651.34	823.16	361.31	458.99	428.62	613.7	359.55	663.39	379.91
201479_at	DKC1	732.37	834.02	1221.29	979.76	1045	1081.93	884.19	672.6	906.74	2114.49	448.87	593.83	820.58	287.36	607.74	944.44	1221.48	732.84	572.9	1492.98	1429.42	831.46	943.39	705.08	669.62	616.69	575.85	441.56	462.33	1035.39	670.47	430.9	943.68	442.54	675.54	509.63	676.82	354.33	457.15	915.32	1232.95	585.07	594.32	688.89	865.16	517.39	972.72	609.04
201480_s_at	SUPT5H	305.21	296.18	219.12	292.6	368.82	267.81	298.28	328.07	250.52	191.52	300.45	250.32	322.51	319.47	1018.31	325.58	345.38	257.79	418.7	451.88	308.89	204.54	161	235.87	338.83	219.31	189.53	241.18	550.74	285.27	259.96	370.97	254.29	342.6	307.96	225.32	387.29	318.58	277.49	235.62	351.62	587.54	195.47	265.35	159.05	164.95	189.15	278.47
201481_s_at	PYGB	194.48	353.43	775.38	827.96	536.43	476.73	386.98	340.53	197.54	372.4	201.77	339.61	652.36	294.09	693.43	298.95	764.08	445.73	424.7	353.31	393.79	298.05	2407.95	282.73	373.2	700.68	181.33	253.91	620.39	659.34	237.96	681.19	519.8	449.07	774.97	381.64	493.19	680.77	163.65	502.22	1743.17	492.16	258.86	617.86	251.19	191.81	281.4	486.85
201485_s_at	RCN2	758.19	237.92	167.49	519.73	289.23	654	339.55	486.07	397.84	577.28	403.01	253.89	383.71	257.74	289.9	344.88	282.31	386.39	254.57	697.86	461.12	407.99	349.89	371.45	347.36	361.48	475.99	244.94	388.98	327.59	361.05	294.12	352.5	289.09	638.88	805.21	360.69	249.88	234.89	475.61	437.22	200.18	523.28	265.87	721.52	242.57	264.65	241.32
201488_x_at	KHDRBS1	672.88	849.04	791.2	744.36	762.58	783.45	734.13	1176.66	1376.32	1157.22	630.56	674.43	827.48	521.67	611.16	723.29	841.97	922.15	946.91	643.69	918.29	962.35	1221.69	1340.9	1139.76	862.29	876.75	576.52	843.24	765	756.61	950.7	518.3	663.75	824.87	625.59	623.34	547.08	998.28	636.69	1464.79	704.65	629.1	661.1	1059.88	896.14	701.35	706.41
201489_at	PPIF	722.81	687.98	776.38	1067.81	749.41	1527.6	861.85	368.95	876.67	1181.58	506.2	580.09	551.27	415.64	857.65	983.05	1166.3	398.37	851.14	1051.47	617.58	615.36	497.75	525.84	607.67	556.63	511.52	464.57	208.46	744.78	524.28	732.18	651.75	347.05	357.56	284.61	606.91	374.01	347.19	1099.7	429.76	346.87	407.59	546.63	751.33	653.77	343.62	487.34
201491_at	AHSA1	495.99	632.66	1081.55	565.67	552.08	500.57	650.35	692.97	842.58	637.18	396.1	333.06	415.56	298.28	586.04	553.4	665.84	442.88	807.89	551.58	963.8	750.77	493.97	657.44	697.49	420.21	519.34	310.49	329.54	312.52	732.74	431.07	564.21	413.2	268.87	346.06	513.91	302.98	325.5	781.36	764.56	386.34	478.66	573.42	524.89	423.47	436.23	614.41
201492_s_at	RPL41	13557.2	10858.5	13044.8	13763.3	11815.2	14656.1	9631.95	8841.28	11751.8	9740.67	12147.8	14322.3	8807.51	12179.6	12368.1	9298.44	11560.6	8037.22	7837.08	13373.9	10220.8	12595.1	10436.1	8475	8393.71	10203.8	9964.16	14025.6	8861.22	10274	14546.5	9867.88	12254.7	12195.6	11299.7	10389.3	12116.4	13860.6	13237.2	13369.7	10246.7	6455.3	12940.9	14247.2	15112.8	14701.7	11402.5	13290.2
201493_s_at	PUM2	547.71	446.62	799.55	363.98	333.04	759.64	416.69	572.55	317.33	393.94	573.6	869.15	756.9	455.19	435.96	557.48	458.73	271.68	410.75	418.97	531.61	514.9	437.56	391.11	316.87	455.72	511.21	532.82	931.78	392.56	392.18	668.58	526.36	448.48	573.45	450.99	428.76	459.59	303.7	467.03	597.87	333.57	626.11	556.85	431.11	417.16	501.19	454.13
201494_at	PRCP	619.87	465.16	343.29	493.31	457.34	645.04	422.12	353.97	610.93	433.8	905.68	479.05	750.61	1030.15	735.49	466.75	380.21	331.2	393.89	1076.37	536.51	356.3	431.36	310.38	317.24	511.27	460.14	444.83	578.54	496.86	461.77	265.49	806.44	898.74	445.22	544.03	1088.53	388.83	479.95	485.25	570.2	677.01	708.81	525.89	806.6	274.76	1269.38	925.07
201498_at	USP7	231.4	508.43	583.04	539.09	318.25	684.84	949.08	515.4	609.05	734.26	489.6	552.17	508.39	420.4	394.42	458.97	269.82	764.51	648.63	353.66	350.19	417.09	531.84	655.47	651.72	581.01	446.35	659.15	556.87	442.73	736.99	564.88	478.88	418.67	453.93	277	312.18	431.09	573.54	351.64	1866.89	258.4	692.6	451.03	517.86	750.39	502.68	363.46
201499_s_at	USP7	341.62	590.33	546.94	706.77	583.09	877.61	704.24	597.26	783.89	856.83	603.67	579.45	574.64	487.35	602.43	610.29	449.19	833.47	784.9	683.56	312.19	478.03	618.25	621.37	799.98	707.92	566.59	686.24	623.09	576.7	780.1	638.61	548.42	527.58	666.64	380.94	507.32	564.24	769.27	464.8	1963.1	362.15	869.47	482.54	448.45	817.41	701.35	616.83
201500_s_at	PPP1R11	819.17	956.04	776.18	735.21	732.44	935	698.13	697.78	479.29	604.96	767.94	944.35	733.58	693.72	773.86	888.2	865.36	960.83	837.18	589.2	656.38	639.46	620.92	1024.09	1109.05	623.61	673.86	822.98	979.27	826.05	791.72	1468.6	1131.42	648.19	866.62	835.44	1402.89	849.86	534.54	604.22	800.97	1322.44	836.15	384.22	708.18	896.56	581.14	745.67
201501_s_at	GRSF1	431.16	134.84	215.46	226.51	161.22	306.73	283.51	325.94	234.09	481.89	417.66	384.57	315.64	136.19	114.71	320.76	137.67	292.41	204.18	338.16	319.74	367.75	331.67	197.37	293.43	328.11	346.55	966.07	306.53	287.66	304.83	345.28	254.85	240.28	180.94	221.32	255.36	131.51	197.27	305.1	120.99	328.86	391.24	341.35	329.47	360.5	279.63	267.78
201502_s_at	NFKBIA	3885.18	1968.88	646.9	789.34	2326.98	1384.24	1134.74	1100.81	4375.21	4034.95	2617.8	1238.74	2072.02	1474.87	1066.2	1999.64	1286.8	2529.48	2234.41	1181.06	1420.02	1138.89	1697.39	2533.22	4004.84	1594.73	1315.77	615.06	685.72	1512.21	628.26	1518.99	794.04	1427.63	2005.01	1525.32	1509.04	2210.82	2190.77	1085.4	817.1	710.57	1094.01	1858.91	1291.71	1499.26	491.93	2116.07
201503_at	G3BP	694.47	472.52	782.59	603.33	534.36	748.14	661.07	349.77	604.77	583.36	564.39	457.09	484.26	332.34	591.42	675.42	521.62	648.43	757.66	538.58	627.06	852	405.59	325.11	597.5	341.27	467.52	393.72	563.63	1185.95	548.51	264.23	252.26	363.47	692.37	450.74	356.64	335.14	411.45	422.63	520.31	341.41	534.93	411.37	309.76	421.33	482.64	333.45
201506_at	TGFBI	1246.81	1394.26	495.22	1804.8	898.96	981.77	665.21	757.83	2211.87	910.58	1760.77	1646.71	2113.78	2233.05	1477.03	887.72	1433.22	2667.74	1588.02	1987.39	901.47	373.02	1129.58	2413.11	644.25	1518.3	1422.39	857.32	532.97	1372.87	4455.67	1983.75	861.31	1326.08	2678.78	1617.4	1816.82	1293.87	125.8	808.63	454.08	3949.09	938.36	373.95	773.89	1548.22	2363.31	743.87
201507_at	PFDN1	168.58	188.13	155.3	195.78	166.57	202.15	170.86	197.98	183.03	159.02	156.68	162.77	153.29	176.64	216.07	161.37	149.57	174.53	187.12	298.49	141.12	175.61	163.02	148.67	210.83	190.4	233.46	175.51	111.98	162.59	235.17	184.7	194.93	160.27	170.43	218.43	173.06	217.78	185.28	166.69	166.4	153.84	151.97	161.31	114.34	210.59	199.6	158.71
201508_at	IGFBP4	932.27	778.42	393.82	820.89	622.94	1337.84	403.36	1344.67	430.71	193.04	1016.42	510.95	633.36	2523.48	1102.08	527.05	344.3	341.25	834.99	605.42	554.85	269.11	805.47	548.14	518.4	301.4	723.32	694.59	1447.14	649.71	421.11	757.38	1691.53	2795.14	1547.68	408.77	1427.76	988.8	111.99	378.65	446.63	997.99	417.84	187.94	1022.01	341.05	878.37	759.01
201509_at	IDH3B	140.22	203.99	310.18	231.86	283.6	379.66	146.17	145.51	142.52	262.42	168.66	173.41	180.04	136.14	231.16	170.5	223.75	150.15	160.29	128.48	356.05	209.91	205.92	127.78	146.65	173.06	258.7	163.79	124.19	199.3	182.14	127.83	211.79	151.52	191.21	180.5	156.1	172.61	172.27	218.59	214.04	148.11	284.07	171.46	181.73	148.31	205.05	175.99
201511_at	AAMP	282.05	239.35	538.48	262.16	342.93	344.91	375.64	183.46	266.77	321.98	245.77	222.32	321.98	255.02	353.1	557.52	370.45	167.48	267.46	363.82	347.39	433.85	247.8	205.51	233.13	281.42	213.64	297.47	248.82	370.37	218.4	218.15	205.46	286.75	358.1	257.83	315.6	321.61	134.54	370.01	322.55	299.39	295.62	596.43	395.48	294.89	447.32	415.6
201514_s_at	G3BP	390.95	306.48	382.61	343.25	313.92	348.39	340.13	198.91	441.09	398.85	297.5	273.1	294.63	209.03	385.19	342.47	304.65	300.26	366.4	355.26	255.66	410.12	322.53	185.21	423.19	287.69	297.41	227.73	288.68	698.9	342.3	208.7	167.24	239.77	422.76	310.33	274.11	278.99	271.77	284.56	295.07	225.98	312.79	241.34	167.05	209.72	307.52	298.99
201515_s_at	TSN	874.28	435.59	611.26	758.25	886.7	748.02	450.59	573.39	498.6	600.91	574.18	331.92	747.83	401.04	555.69	540.34	523.67	665.54	599.15	417.41	910.66	751.51	662.58	562.32	389.75	573.72	509.16	729.98	761.76	636.64	644.51	655.88	399.13	473.67	557	494.46	474.36	522.65	345.17	908	1258.47	728.1	714.64	668.48	337.73	537.5	1007.42	593.1
201516_at	SRM	456.33	593.84	1109.99	456.42	690.12	490.55	777.57	349.89	477.8	721.28	304.8	376.62	308.31	417.07	561.28	898.83	621.45	284.71	1134.14	668.45	752.27	644.61	353.07	726.74	1033.76	292.11	648.29	324.17	288.31	573.43	401.05	401.93	665.91	335.92	382.81	209.93	447.75	587.16	402.39	620.97	419.48	450.62	367.14	330.66	852.37	174.39	268.76	274.52
201517_at	NCBP2	396.89	299.91	498.06	311.74	390.25	414.38	530.23	405.98	284.77	260.66	241.22	482.22	351.93	196.6	307.05	277.28	303.42	514.83	169.12	185.18	351.66	574.14	299.85	311.16	257.63	367.98	224.77	260.45	659.83	366.15	445.76	244.97	186.66	215.02	382.03	309.81	258.4	264.14	297.59	366.05	530.42	251.58	450.44	914.41	562.4	281.75	364.81	441.86
201518_at	CBX1	601.79	591.69	403.81	733.05	716.96	801.64	779.11	647.59	576.66	705.12	437.57	498.82	530.74	367.52	533.43	593.61	801.87	594.93	304.01	555.89	694.31	1284.84	673.37	509.21	654.54	764.12	659.09	360.05	798.45	1127.5	903.23	1079.74	440.79	558.46	827.08	470.33	674.7	577.16	289.88	614.6	1319.73	619.99	659.8	1318.68	959.88	940.26	677.2	1044.14
201519_at	TOMM70A	641.99	650.74	880.68	868.45	715.38	753.14	566.07	505.76	354.14	1081.84	566.3	472.32	564.35	360.27	535.27	1080.26	780.68	823.86	440.67	412.82	822.96	1102.08	511.46	760.96	807.3	1003.56	496.27	972.18	366.16	897.02	723.1	695.07	451.08	729.86	670.51	432.39	515.48	889.03	388.22	676.96	648.88	638.31	775.49	1182.04	971.49	786.33	1021.75	1117.67
201520_s_at	GRSF1	692.88	272.92	378.55	616.96	796.4	565.63	382.47	856.78	507.34	1080.67	576.03	608.64	707.95	317.35	473.09	773.65	500.41	378.38	437.85	1611.24	479.32	601.73	654.3	334.94	521.27	445.59	742.88	1300.05	363.06	656.55	628.72	746.1	556.75	572.52	556.54	644.13	923.66	236.42	314.56	567.59	541.76	758.51	757.59	695.11	597.16	552.64	561.83	639.49
201524_x_at	UBE2N	1145.59	690.24	810.49	856	845.6	1765.7	745.94	732.7	697.45	771.88	840.78	913.5	909.78	641.41	827.2	785.42	1034.64	521.04	660.69	651.02	897.43	926.03	786.08	397.05	517.7	983.08	640.65	1185.38	599.74	1092.34	1143.37	584.98	704.68	577.98	857.11	854.74	724.93	582.65	721.09	899.67	990.85	406.99	974.34	855.69	982.21	716.21	688.2	979.86
201526_at	ARF5	501.11	234.71	352.86	297.99	522.95	507.2	228.67	203.84	217.45	254.16	239.74	184.65	344.84	242.59	349.09	264.21	310.13	280.96	201.61	299.82	307.43	238.49	207.69	423.05	241.72	295.47	177.78	269.72	255.51	420.81	308.06	361.53	496.17	290.6	306.63	300.94	456.86	284.34	138.88	468.29	291.33	401.59	257.96	566.98	388.99	301.45	186.54	431.35
201527_at	ATP6V1F	1045.66	656.54	982.51	863.99	909.61	1199.72	612.52	597.33	763.34	835.63	577.99	446.36	646.05	598.76	923.08	747.13	773.02	609.14	521.29	737.31	516.84	392.65	562.22	945.36	643.8	717.53	669.29	626.13	426.66	745.06	587.61	589.11	891.74	498.06	522.9	686.85	984.94	578.38	369.6	1028.49	249.01	671.38	628.77	824.47	965.54	777.33	460.36	783.04
201528_at	RPA1	1060.33	627.79	764.86	788.56	506.43	872.93	596.05	644.28	630.92	700.31	570.92	747.27	625.53	362.29	571.72	866.01	532.03	743.03	897.02	797.34	754.32	1650.02	877.81	577.02	526.05	987.65	619.54	523.7	756.18	1258.98	594.33	770.41	524.98	531.7	1160.87	1094.85	953.29	556.35	876.79	577.89	689.53	649.57	530.64	1232.55	776.9	330.15	646.45	546.44
201530_x_at	EIF4A1	4056.54	3978.74	3241.34	3489.23	4032.72	4201.42	3246.47	2604.04	3307.72	2204.93	2923.03	2752.48	3268.82	3157.55	3391.36	3555.92	3751.39	2239.67	2508.63	4036.5	3017.42	4283.5	3345.42	2752.83	3452.63	3417.11	4326.6	2873.27	2273.9	4178.78	2968.24	2993.12	3096.92	3607.81	3915.56	2627.81	5982.35	1940.74	2226.75	3435.34	3851.42	2815.31	3131.15	4104.63	2646.25	2788.66	3388.12	3104.09
201531_at	ZFP36	391.59	1521.01	320.11	456.77	678.39	461.61	781.52	402.41	409.17	332.22	856.53	510.05	676.76	676.06	1231.92	718.6	547.88	394.18	1371.68	727.88	291.11	344.96	395.93	509.85	722.3	301.91	437.03	414.37	559.75	418.57	347.22	1395.43	551.03	2347.08	363.84	568.82	960.85	1266.99	574.36	1094.71	614.55	721.89	451.05	791.84	182.25	295.08	489.05	713.95
201532_at	PSMA3	788.66	550.42	695.11	929.28	1156.62	900.65	555.93	359.34	1263.11	789.35	923.1	518.02	464.65	350.56	786.2	766.13	626.63	411.85	450.74	836.83	825.08	897.95	423.97	304.74	544.73	492.36	761.24	735.98	395.42	1070.43	743.56	440.86	450.68	475.9	442.79	1016.53	579.12	426.65	456.54	695.14	603.28	445.75	936	643.41	611.62	597.98	684.04	718.95
201533_at	CTNNB1	1470.28	1340.21	1212.55	1789.11	2449.77	1439.77	1191.49	1096.5	931.68	756.29	1155.15	1430.02	2213.84	1700.83	1498.24	1193.6	1027.44	814.01	1196.32	1142.87	1698.81	2494.3	1508.37	596.14	723.12	1155.21	875.32	1367.73	1393.03	1700.24	1164.82	1424.44	1146.08	1812.17	1789.97	1348.66	1783.79	2428.55	594.66	1400.9	1070.53	1842.22	2079.38	1768.89	941.87	1012.24	1617.08	589.49
201536_at	DUSP3	331.45	335.33	302.32	251.48	308.81	243.56	296.86	730.65	446.83	355.44	305.39	342.34	276.86	440.27	373.19	244.72	245.4	351.2	293.08	409.73	266.29	266.43	496.25	502.15	468.02	548.4	450.06	260.83	205.53	333.9	433.96	933.91	334.51	494.03	238.81	284.22	469.42	417.1	206.13	249.07	229.96	531.13	233.6	398.49	388.8	348.25	406.98	384.75
201541_s_at	ZNHIT1	520.42	216.77	443.91	377.5	299.42	638.83	275.94	445.33	427.07	413.97	297.11	236.81	299.57	359.26	485.44	312.91	332.26	400.06	188.92	295.77	440.71	272.25	203.29	381.35	256.53	388.07	413.35	293.05	209.81	390.21	424.28	262.94	407.65	208.38	213.83	183.87	514.64	307.9	223.34	893.58	166.45	258.79	253.46	395.09	675.61	418.52	268.14	359.54
201542_at	SARA1	1009.88	691.51	468.59	1058.24	329.35	544.22	797.68	489.41	374.95	708.57	790.58	704.92	544.03	461.98	569.62	476.55	722.05	597.86	351.53	421.07	853.21	582.66	528.48	574.84	465.06	731.43	709.18	788.19	437.69	874.62	492.57	546.56	695.96	483.72	556.78	374.88	570.52	1214.39	275.98	374.33	295.47	1142.29	548.25	387.18	957.59	559.67	788.12	452.1
201544_x_at	PABPN1	1197.69	1895.94	983.58	1312.84	1907.37	1184.02	1264.06	1204.33	1288.14	1403.53	1150.44	939.38	1357.08	1294.56	1257.27	1403.22	7521.25	1088.56	1675.8	1175.62	965.57	1073.54	1013.95	1250.69	1632.75	1051.89	998.11	824.96	913.79	1502.47	899.6	1170.75	994.13	1348.16	1134.48	1284.45	1206.72	1767.75	945.61	758.71	3506.95	1260.23	1103.63	1182.65	1087.61	1143.87	996.45	812.74
201545_s_at	PABPN1	297.06	406.93	295.26	316.16	533.91	324.18	360.68	154.13	192.98	163.8	286.82	258.97	259.91	315.89	406.01	325.58	2761.71	198.14	290.62	269.21	318.26	277.25	159.24	132.68	230.66	165.89	132.83	180.57	233.61	361.87	241.25	269.96	216.45	280.79	255.49	352.55	251.74	392.91	223.63	230.49	831.8	274.02	256.4	265.58	141.87	181.47	194.89	239.54
201546_at	TRIP12	552.48	671.64	321.19	853.83	624.08	813.85	628.47	439.9	726.28	1019.37	1011.09	597.67	916.26	670.46	695.8	881.14	795.56	684.4	689.72	821.71	605.17	748.68	731.98	661.98	696.06	787.38	787.75	911.56	939.19	813.5	906.05	573.99	583.52	830.4	914.76	1033.21	670.06	378.53	759.23	768.66	680.63	1073.24	1031.43	814.75	394.63	731.82	708.12	990.01
201549_x_at	JARID1B	427.86	576.31	278.6	816.63	920.57	620.91	335.87	493.41	128.1	485.08	316.29	635.36	213.71	219.66	499.44	491.41	897.01	667.77	139.39	358.28	446.51	647.93	425.19	635.92	419.38	668.14	661.84	574.53	850.86	272.22	705.5	527.55	1067.39	560.77	1678.81	163.73	396.14	502.55	112.78	520.42	377.68	232.3	720.22	403.19	619.21	977.41	354.73	1258.75
201550_x_at	ACTG1	5091.99	8837.19	5876.99	6818.25	8407.54	7184.54	7234.08	6872.07	4921.46	7874.38	7471.47	6003.72	9284.89	6543.39	6302.84	7119.48	6832.19	7980.66	7736.45	7530.24	7232.15	8288.7	7731.09	7052.38	7862.2	7052.53	7563.12	7442.56	10095.2	7781.75	9344.18	8867.09	6600.65	7809.82	9090.67	7645.46	8963.95	7700.68	6706.93	6678.97	9041.61	10691.1	6668.27	9304.45	6058.57	7022.49	8645.6	8721.51
201552_at	LAMP1	933.65	1898.1	1849.63	1118.26	1396.32	1431.73	1158.83	1747.76	1213.65	1336.49	2106.11	2855.87	1453.4	1668.41	2047.77	2161.99	1485.69	1225.85	3561.97	1319.91	1575.12	1576.04	1303.72	1884.3	1932.11	1252.53	871.33	2188.79	1865.26	2696.01	1042.27	2298.2	2856.5	1901.37	1500.37	1322.42	1920.66	1920.55	679.1	2124.1	922.78	1996.5	1314.01	2257.84	941.63	1286.3	1899.91	1413.92
201553_s_at	LAMP1	2418.84	5151.74	3922.13	3161.63	3212.97	3571.15	3478.21	4998.17	3789.46	4158.98	5208.74	5975.66	3344.5	4225.57	4478.05	4868.83	3321.63	4460.54	7351.91	2917.78	3896.55	4043.62	3974.95	5054.21	5138.36	4105.99	2903.74	5400.13	4971.26	5919.72	3241.88	5068.27	6318.37	4393.27	3462.01	3566.01	4369.33	5024.25	3363.73	4757.07	2523.36	4891.76	3455.71	5565.39	2941.14	3511.19	4376.62	3528.52
201554_x_at	GYG	729.42	386.08	625.64	650.41	561.28	467.94	382.52	512.47	628.05	454.64	494.41	415.49	582.83	286.86	564.31	586.06	722.43	691.33	573.16	562.9	621.89	365	247.45	323.55	586.44	350.88	945.31	547.84	252.44	360.95	297.39	395.93	407.46	294.5	269.24	573.81	481.02	207.55	183.37	431.7	117.76	340.91	451.81	508.83	289.17	313.6	332.22	255.05
201555_at	MCM3	545	571.5	503.54	747.78	933.16	452.01	623.61	884.01	1086.04	832.03	365.32	579.96	722.05	247.3	275.36	505.26	476.83	457.7	559.01	492.46	1002.98	1472.79	783.36	336.35	625.44	516.67	400.83	323.28	780.48	548.83	451	811.26	394.36	264	655.08	647.69	737.37	525.22	488.33	322.95	1545.38	394.59	496.61	506.49	430.43	231.26	732.29	348.89
201558_at	RAE1	567.75	846.33	693.11	660.11	550.57	849.1	488.47	526.11	470.07	504.1	497.97	324.75	340.52	308.59	477.52	449.47	561.99	322.24	437.44	352.99	720.25	672.99	483.31	324.65	528.98	512.5	679.47	439.49	342.8	375.8	670.7	431.11	453.01	284.71	511.99	512.1	392.85	388.85	623.62	643.07	822.31	294.16	509.22	686.34	770.46	568.53	1162.1	561.33
201560_at	CLIC4	1413.75	809.3	1505.64	1316.2	593.91	758.21	599.91	590.34	640.77	1608.39	1066.46	898.07	1676.57	1183.79	678.78	713.46	1467.55	1792.39	1312.54	640.44	2137.83	2086.14	2073.31	1288.72	981.4	1042.23	1295.36	1273.44	1182.68	1642.56	1123.91	1112.67	952.85	1028.5	1310.24	1245.88	1107.86	828.03	490.26	2223.13	559.7	1359.76	1282.18	1807.09	969.88	846.14	1429.16	1244
201561_s_at	CLSTN1	460.98	604.35	622.36	659.27	709.54	763.12	430.64	576.91	477.53	864.07	726.9	743.36	736.49	767.94	636.94	753.37	585.07	593.5	1356.06	736.31	628.63	552.74	1509.59	796.04	996.23	761.21	955.69	879.93	1225.42	820.16	489.31	1176.95	573.87	838.52	1137.82	535.14	658.41	3587.28	711.17	606.37	801.48	751.64	595.46	421.74	752.92	466.56	735.76	736.05
201565_s_at	ID2	643.05	800.47	293.67	609.52	985.38	482.27	528.19	599.88	713.64	320.08	756.97	664.61	650.2	639.5	683.04	452.62	333.9	565.81	360.51	471.18	720.6	581.16	1029	347.73	342.51	705.57	709.3	546.03	178.1	448.39	657.5	445.55	794.09	671.29	366.45	808.86	760.55	667.35	210.38	631.6	1176.75	207.19	852.54	419.83	590	931.92	445.47	632.22
201567_s_at	GOLGA4	330.67	369.92	920.45	517.24	319.29	452.3	410.01	377.06	305.46	464.92	495.1	424.45	326.8	316.26	310.68	678.1	408.86	355.55	384.47	525.99	662.35	530.13	523.32	264.61	380.62	308.65	412.43	336.43	363.31	481.8	593.74	623.33	353.22	386.37	201.13	333.31	372.56	776.36	281.9	637.61	177.63	863.06	683.76	496.36	659.46	662.16	573.42	389.72
201570_at	CGI-51	253.84	330.01	308.81	458.38	451.18	401.27	262.93	247.2	517.18	330.76	362.53	462.05	255.12	262.6	303.14	386.34	271.21	370.57	367.79	366.81	221.06	262.31	302.49	349.28	257.54	407.43	248.44	415.58	200.28	344.58	504.41	151.07	360.59	266.37	162.42	159.64	264.94	349.76	338.33	465.62	181.74	216.43	279.04	239.61	507.05	258.33	227.56	350.7
201572_x_at	DCTD	301.39	244.25	282.51	218.8	240.49	298.58	194.74	196.83	462.13	284.07	282.53	212.92	265.88	297.82	318.45	825.66	202.52	243.06	351.24	257.57	354.86	178.76	227.13	246.31	257.21	201.18	335.62	405.25	150.01	260.98	241.52	143.43	277.36	235.81	331.77	145.92	267.38	306.95	288.7	137.02	147.77	198.5	226.12	150.42	180.39	258.07	254.63	213.94
201573_s_at	ETF1	221.61	214.55	185.14	299.95	283.9	403.24	184.01	204.4	250.74	330.62	262.17	172.88	164.73	157.21	234.2	287.49	185.01	183.9	176.16	261.02	236.93	272.35	198.05	162.59	157.71	176.04	287.92	173.26	158.75	198.31	288.15	189.64	181.8	150.39	195.14	217.87	210.91	210.88	157.15	283.22	214	166.54	204.37	317.13	190.44	210.81	202.17	179.8
201574_at	ETF1	591.03	566.81	687.56	537.94	509.84	532.42	495.22	510.05	500.19	616.82	462.84	440.92	490.82	448.07	715.53	690.36	438.2	608.81	579.5	642.21	573.29	543.21	548.87	481.53	452.68	348.68	716.95	552.89	411.31	443.47	763.64	347.87	398.01	490.4	596.14	387.06	547.1	574.48	404.83	576.25	397.21	602.73	467.72	455.46	338.54	625.84	655.89	275.83
201575_at	SKIIP	373.88	394.6	303.45	451.92	324.23	346.03	426.29	508.51	549.11	375.27	440.6	316.61	251.91	312.92	312.1	429.97	382.59	425.8	316.98	365.67	577.41	503.99	419.04	372.72	381.08	193.44	436.92	249.74	304.07	269.95	536.2	324.86	321.52	350.99	216.49	362.95	318.7	292.96	476.39	412.44	578.13	258.94	395.2	457.63	294.04	452.55	382.28	467.6
201576_s_at	GLB1	328.15	249.31	265.17	329.85	534.36	356.84	332.2	387.54	332.09	267.78	446.76	289.31	355.34	375.51	701.83	646.26	307.28	259.89	342.19	549.66	325.04	257.29	258.67	191.05	282.08	236.26	410.33	499.36	383.19	360.78	377.79	393.65	349.96	407.68	229.79	326.72	482.77	456.52	127.73	382.98	227.11	356.07	520.45	380.36	336.46	520.32	467.25	317.33
201577_at	NME1	863.2	1081.03	744.22	662.34	1273.27	1430.14	312.49	590.98	937.3	680.38	309.09	366.05	399.74	200.22	469.13	546.43	1055.76	345.56	653.91	790.09	888.7	801.26	697.51	195.46	719	586.29	670.55	359.02	199.2	1007.95	916.66	328.82	486.96	191.07	537.02	757.66	419.58	384.53	218.44	1227.78	342.3	224.15	1082.55	1207.99	881.11	713.45	520.52	965.58
201578_at	PODXL	671.91	287.86	969.26	337.16	402.46	1972.89	293.3	1479.8	586.04	353.22	481	1521.22	2356.52	751.92	450.56	380.43	736.16	1564.99	415.49	783.17	1037.2	306.86	628.86	634.66	852.16	1554.02	293.15	392.4	511.99	1827.91	181.09	656.71	538.56	995.81	614.19	631.16	538.91	487.05	118.14	169.59	254.79	417.81	463.77	908.75	403.12	329.57	266.66	291.93
201583_s_at	SEC23B	285.95	265.14	202.41	419.88	489.74	613.39	279.59	478.27	375.9	516.02	265.34	267.62	380.42	214.62	450.51	390.82	506.65	592.44	366.23	267.43	321.75	335.8	251.34	146.2	324.96	425.77	352.4	342.42	399.93	387.59	426.71	243.12	747.62	314.46	242.01	420.15	289.24	324.77	236.63	365.38	270.17	384.34	871.46	369.5	674.54	269.18	376.31	703.44
201584_s_at	DDX39	620.53	669.32	677.3	939.75	895.95	549.27	766.64	738.25	1000.43	683.31	510.75	717.99	716.38	628.94	428.72	1069.17	1239.5	1002.92	819.65	429.23	1386.5	857.39	711.21	966.58	664.36	760.3	939.13	560.63	418.31	752.55	752.17	708.13	664.93	552.52	467.11	804.08	631.08	677.51	960.41	665.25	1334.46	894.41	820.68	1141.75	812.62	601.86	530.66	1721.8
201585_s_at	SFPQ	418.61	514.95	615.31	460.98	650.82	433.07	466.87	416.33	548.63	580.73	346.48	450.64	551.48	344.52	345.21	542.71	530.75	362.69	565.6	558.63	670.56	583.99	581.97	368.11	470.76	391.97	335.45	321.84	545.8	517.67	462.9	565.91	309.48	394.71	549.45	459.48	435.16	278.15	224.07	333.23	662.84	384.67	514.97	517.51	377.07	311.66	439.64	505.37
201586_s_at	SFPQ	783.34	922.22	1030.55	685.45	929.81	826.19	738.86	1144.13	1523.22	1568.5	805.53	697.17	924.88	575.18	549.27	1034.92	614.75	1067.47	1276.47	895.47	1331.12	1099.9	1428.21	884.63	1172.78	952.35	779.74	618.88	1142.61	1246.78	660.51	878.46	431.76	722.29	946.58	671.57	591.17	434.7	777.09	631.26	1153.35	821.81	1034.64	932.6	907.11	842.72	1014.51	929.43
201587_s_at	IRAK1	1102.54	999.77	2670.23	1014.51	1467.62	1400.3	1262.4	1422.42	933.19	3048.91	655.33	929.86	1371.46	628.42	974.83	1821.54	1601.6	1458.62	1148.93	1643.65	2062.8	1579.47	948.47	910.49	1050.34	818.39	857.81	533.54	811.71	1586.05	1592.35	693.83	1224.87	698.6	641.2	844.14	1371.46	614.29	729.99	1167.16	905.1	1454.04	549.31	1924.57	1226.52	559.97	1432.59	722.53
201588_at	TXNL1	1320.63	814.51	1185.94	647.39	1598.51	805.8	841.67	843.23	1024.58	941.8	917.78	1286.03	657.05	638.45	551.3	1031.38	781.54	544.64	655.63	1716.14	968.53	566.23	650.3	838.53	556.14	1280.15	728.72	751.52	706.61	1368.37	1479.31	796.83	1444.95	657.54	457.01	878.53	707.2	469.13	771.78	860.64	517.9	987.2	890.1	416.3	1920.74	692.47	566.74	573.45
201589_at	SMC1L1	728.55	1136.41	481.04	1226.04	292.96	744	747.89	802.33	636.1	379.33	736.75	751.46	531.83	376.58	436.89	811.82	437.54	522.47	806.68	458.25	1229.41	835.27	633.33	427.52	994.49	698.92	625.03	508.34	1197.17	589.67	591.52	692.52	370.15	1711.28	820.47	774.17	780.24	483.51	639.63	604.52	840.93	1088.39	721.43	566.79	687.77	641.66	635.75	479.19
201590_x_at	ANXA2	4963.78	4468.27	3103.16	5242.45	3935.29	5279.99	3830.15	5166.24	5866.24	4504.4	5515.84	5593.17	8119.79	4024.99	6711.7	3335.11	3929.18	6592.81	4659.91	4101.78	4513.33	4598.37	4415.67	4652.65	5856.93	4278.12	6563.86	5309.56	4826.86	5890.02	4388.64	6328.14	4223.15	4865.85	3922.78	8813.54	6141.86	6687.31	2027.11	6008.86	943.67	8994.57	2886.78	3457.57	2654.69	3791.69	4457.1	4272.97
201591_s_at	NISCH	470.39	866.04	623.86	640.25	714.61	433.95	972.81	412.54	466.57	378.33	694.84	784.63	594.25	1606.63	989.56	549.84	461.66	578.63	581.07	524.71	745.84	844.75	796.54	659.61	764.61	391.87	412.55	631.56	592.62	557.62	677.75	372.57	569.5	1240	759.75	543.04	721.77	1468.43	818.69	579.74	960.95	720.72	442.76	529.53	646.21	369.61	422.17	513.15
201592_at	EIF3S3	2554.94	2742.25	3540.81	1747.56	2364.08	1423.89	2064.35	2147.53	2959.16	2657.75	1982.85	2986.25	2262.81	1795.98	1774.05	2647.83	4435.94	1659.06	3673.81	3436.77	2781.61	2372.51	2559.94	2862.92	2171.06	2343.24	1697.82	3824.99	1865.11	4678.31	1944.37	1581.05	2120.68	2115.64	1442.96	1504.9	2671.71	2396.16	2077.42	3742.81	2672.59	1498.78	2463.45	3440.06	2961.13	3055.42	2286.24	2917.18
201594_s_at	PPP4R1	428.61	422.21	322.56	396.15	281.2	667.64	333.16	373.85	290.09	764.77	467.91	406.95	482.17	428.25	528.27	358.37	559.97	484.42	310.21	585.33	402.98	690.88	612.3	614.76	388.98	349.61	378.05	443.86	770.53	580.65	250.83	909.34	464.09	486.81	585.49	312.17	915.81	352.74	242.19	368.33	260.83	474.42	487.8	1033.51	195.45	345	388.14	324.89
201595_s_at	LEREPO4	376.01	276.51	618.01	640.27	562.07	401	447.17	339.1	462.5	919.26	498.84	287.69	388.92	246.09	198.16	456.93	581.1	520.48	309.1	442.56	582.26	309.6	370.43	252.37	317.66	462	300.57	404.51	335.43	455.6	525.71	297.41	385.13	200.86	238.69	235.71	236.92	272.71	284.64	574.36	334.01	223.02	466.93	503.16	403.45	391.41	382.44	439.67
201597_at	COX7A2	746.4	547.76	987.8	848.15	843.4	1128.23	561.88	743.24	1015.03	1177.84	894.13	619.85	401.22	456.31	638	650.55	654.84	729.62	510.45	803.54	1419.32	977.7	804.19	559.81	491.78	1123.41	949.18	1197.07	772.92	616.43	1182.71	533.18	981.4	426.08	570.11	1154.13	467.36	749.72	597.07	1528.71	487.74	382.87	996.61	908.83	1244.27	1200.87	911.26	698.22
201599_at	OAT	3065.55	1388.45	1974.32	2454.34	1054.29	2920.65	1703.53	547.05	1197.7	1674.77	2857.38	3391.58	2555.59	1121.24	888.85	1437.67	1603.34	1421.87	1647.89	951.51	1955.71	1607.63	1479.11	738.16	1681.37	3220.61	1651.33	1597.6	779.7	796.57	1265.64	1384.54	2927.88	1511.84	872.74	1651.91	2204.84	2293.14	382.5	1825.22	765.12	894.42	2033.51	2658.33	3623.07	1424.09	2368.47	2366.98
201600_at	REA	2008.24	2092.16	4296.71	2177.72	1931.08	6345.84	1549.48	2761.13	2970.87	3145.88	1383.98	1829.92	2856.12	1541.9	1658.38	2475.87	3504.92	1296	1841.15	3377.31	2282.78	1652.97	1480.84	1399.01	1816.9	1081.61	1122.45	1676.7	773.16	1413.17	1165.89	1115.25	2023.29	1184.12	1450.6	1249.03	1726.3	764.66	1140.75	1286.95	2232.43	824.03	1399.31	1366.11	1014.67	1685.53	1290.22	1432.97
201601_x_at	IFITM1	3127.8	3288.02	514.42	2024.84	4730.3	885.39	3436.49	2510.82	2586.29	3332.68	3068.34	1584.98	830.14	1698.67	4236.58	2400.59	4917.1	3539.05	5374.11	1877.05	3724.24	4628.08	2251.32	778.95	3655.02	2564.95	2286.33	760.75	1021.69	1617	2014.03	884.25	1679.19	2214.22	1299.14	4123.98	4206.89	1943.33	605.75	2052.58	1177.89	2017.89	3935.59	3927.45	5291.33	510.33	1478.13	6554.81
201603_at	PPP1R12A	468.77	307.16	297.91	300.43	227.7	364.37	388.67	282.2	219.43	229.82	457.53	379.9	393.27	441.99	250.59	334.63	221.99	332.83	183.99	209.18	616.33	472.2	378.04	237.89	402.31	170.27	264.03	319.71	350.45	625.8	290.07	260.94	229.58	352.32	295.2	249.31	175.11	245.31	305.62	325.68	342.37	264.99	406.8	289.31	231.61	335.39	335.45	318.71
201605_x_at	CNN2	216.25	217.06	135.4	172.73	143.48	426.27	228.71	186.61	153.71	106.95	235.26	146.81	251.67	465.17	295.29	175.52	137.1	183.24	271.85	189.37	146.45	113.38	264.13	388.5	184.55	211.64	288.74	214.69	237.69	237.03	135.24	215.46	348.01	298.99	416.55	178.59	465.87	340.43	228.25	338.97	142.27	442.96	176.78	118.25	141.7	170.94	263.87	189.22
201606_s_at	PWP1	635.09	449.37	626.74	477.86	399.36	541.49	299.39	964.86	946.73	1041.66	421.57	638.71	371.5	420.27	350.99	467.8	607.28	521.37	421.95	510.24	707.12	736.16	975.17	771.93	691.33	1076.95	707.7	453.3	293.75	467.29	544.75	372.23	367.95	348.94	501.28	333.68	364.07	487.88	839.17	524.76	633.19	383.22	455.8	458.21	865.06	814.91	356.95	546.27
201608_s_at	PWP1	522.19	384.74	498.21	430.39	473.36	501.59	289.97	483.86	551.73	566.76	337.83	495.04	346.46	355.28	424.65	447.4	565.6	383.65	342.12	477.36	557.52	706.14	544.22	335.14	313.81	568.39	393.88	349.89	209.67	396.05	500.24	294.34	383.97	281.64	524.82	272.78	417.77	366.47	405.26	450.07	471.62	279.31	362.45	463.37	481.18	458.4	310.77	396.24
201609_x_at	ICMT	441.79	378.28	327.14	457.54	474.76	620.45	316.87	343.21	307.03	635.55	379.14	439.56	334.81	268.32	340.49	384.9	365.31	369.54	615.1	517.91	426.87	521.86	553.98	578.29	524.66	341.53	414.81	399.52	425.63	411.21	371.26	463.87	420.71	336.31	445.93	381.71	510.47	316.68	179.38	453.21	479.14	549.32	630.06	309.15	398.68	182.84	424	387.75
201612_at	ALDH9A1	1437.19	1021.13	265.27	1111.78	1752.8	752.85	1412.58	924.88	661.58	1017.04	1244.58	998.49	724.85	883.89	947.76	1070.61	867.94	1050.81	656.73	978.17	656.93	1790.16	564.34	575.73	962.67	1151.19	651.65	1061.72	806.79	1480.69	2172.01	1056.27	1195.43	1102.21	2436.68	663.98	948.28	774.94	495.15	1005.45	739.66	385.78	769.01	1463.82	1301.15	1113.52	645.73	1215.49
201613_s_at	RUVBL1	323.97	591.5	290.39	324.3	597.85	202.25	418.53	277.59	253.84	191.77	337.85	245.23	300.67	428.43	402.86	273.79	2619.74	148.6	317.77	338.47	134.1	227.92	167.78	231.26	246.92	248.7	232.22	353.22	277.18	223.94	310.21	285.41	362.93	406.08	160.98	366.33	429.54	553.09	559.01	271.66	967.66	244.48	341.3	204.22	346.72	367.39	268.69	439.54
201614_s_at	RUVBL1	287.36	446.17	324.05	326.61	536.84	569.57	344.02	597.19	415.32	510.12	206.71	268.62	279.9	119.33	250.58	550.25	392.7	356.2	294	218.64	518.81	715.72	259.11	207.15	397.71	271	281.07	231.79	162.05	363.31	470.83	250.08	287.5	153.98	290.7	130.54	228.39	259.15	186.59	447.23	316.28	233.15	328.18	484.04	294.8	335.44	327.44	391.97
201616_s_at	CALD1	624.74	754.32	568.14	414.24	420.99	548.61	338.6	305.3	883.87	637.47	904.8	255.81	1155.69	1068.31	445.6	154.57	548.75	1594.97	474.25	947.04	409.96	272.32	1671.69	1349.59	1270.9	1594.02	1380.98	731.39	833.18	1157.86	454.64	660.28	730.48	1433.78	894.49	363.4	1274.21	672.95	224.66	431.45	293.45	2322.22	596.02	1353.68	557.54	632.8	1024.82	501.97
201618_x_at	GPAA1	345.37	474.93	414.1	233.39	308.7	307.03	309.19	439.25	250.54	280.77	233.27	513.51	574.28	357.32	301.66	508.16	298.09	364.25	905.96	378.57	411.05	391.59	183.43	447.61	188.42	292.26	221.32	331.93	303.45	293.45	1011.41	549.88	518.63	367.92	314.77	314.73	497.87	707.22	240.32	572.4	565.57	438.92	239.35	219.94	856.25	220.6	435.09	331.54
201619_at	PRDX3	1037.38	382.83	567.18	601.23	735.89	1028.42	788.17	458.65	658.48	698.79	1199.44	1121.14	732.42	504.3	606.66	650.8	656.58	379.96	471.34	712.17	1045.92	737.87	510.98	383.14	449.08	789.78	429.42	871.56	429.44	536.1	843.12	592.23	1073.89	504.5	362.8	501.26	537.74	663.05	359.72	684.73	468.83	240.14	1064.96	711.15	1064.86	490.57	852.09	1684.39
201620_at	MBTPS1	240.59	254.81	299.4	230.28	393.45	304.23	324.63	253.47	239.23	140.02	265.82	378.55	360.47	378.88	291.19	258.34	233.81	264.2	198.77	170.1	254.94	220.98	329.51	296.05	265.05	287.1	237.21	426.47	411.3	419.13	237.07	244.06	292.42	412.03	249.24	176.65	269.96	245.31	235.34	217.32	395.64	581.21	222.42	193.81	324.31	167.12	672.82	378.17
201622_at	SND1	691.34	642.36	838.68	514.12	513.24	741.87	559.61	637.5	754.86	739.21	518.33	544.68	750.55	660.79	701.94	751.2	1058.07	628.77	679.07	713.01	785.26	466.42	581.98	1237.1	575.92	1054.73	511.64	412.45	590.64	878.77	502.5	700.62	859.13	580.04	658	661.1	654.75	559.31	696.72	813.82	469.51	727.28	625.11	734.56	1052.24	809.01	480.89	915.74
201623_s_at	DARS	575.35	440.77	705.32	701.91	979.62	392.42	375.29	626.06	609.59	564.07	464.99	361.02	259.76	358.13	808.04	397.93	434.35	747.96	591.21	398.94	738.19	390.84	752.12	591.08	305.23	841.74	425.48	598.32	399.55	567.7	697.54	587.57	338.89	290.01	579.93	384.78	463.72	293.86	564.02	668.39	549.3	570.35	387.92	410.46	583.04	748.41	483.26	690.41
201628_s_at	RRAGA	688.08	489.64	820.34	707.77	994.95	824.83	688.42	596.02	449.15	342.95	527.23	470.33	522.36	504.24	784.56	610.22	546.43	354.71	380.57	472.28	570.21	495.41	441.24	347.36	547.85	340.42	401.23	364.57	410.25	457.43	980.81	1135.94	767.51	632.26	448.36	700.26	690.44	561.59	308.16	620.06	410.82	1078.36	458.92	962.04	330.11	575.44	530.82	523.57
201630_s_at	ACP1	767.87	312.86	589.25	290.01	328.21	366.64	423.48	662.06	233.22	257.03	307.71	315.81	434.99	247.22	440	345.56	372.33	273.7	210.21	269.14	662.76	304.4	469.08	296.51	278.46	494.6	377.04	454.92	562.83	271.67	303.1	455.77	587.67	316.25	328.45	431.75	401.07	323.13	238.9	517.41	271.53	135.96	327.49	523.49	296.62	361.44	452.87	434.62
201631_s_at	IER3	1340.99	1106.35	159.07	642.53	551.19	1247.68	513.31	898.74	557.3	1240.99	521.02	934.49	1187.74	963.07	396.63	726.13	495.15	865.75	822.43	916.03	384.65	408.75	718.26	907.54	557.01	998.02	1444.02	413.05	219.65	692.02	440.73	1338.96	720.93	909.66	603.81	430.71	913.79	3706.28	320.7	387.17	679.5	1224.53	1322.46	3019.46	1595.48	2311.46	648.12	1576
201632_at	EIF2B1	569.14	414.09	1077.47	561.82	444.57	457.93	569.83	625.03	348.24	555.1	412.26	506.85	627.38	416.04	500.28	420.58	830.53	365.57	347.85	570.66	657.52	535.62	479.66	375.22	391.93	516.88	324.6	499.35	329.29	829.33	570.84	538.1	577.17	426.37	510.26	420.41	528.06	507.65	457.79	487.61	595.15	374	436.87	362.24	489.83	417.37	859.87	508.08
201636_at	FXR1	331.8	236.87	330.75	335.12	265.67	304.93	518.42	391.93	222.02	226.69	217.93	448.76	299.47	160.12	212.43	247.6	282.87	354.85	179.77	212.19	345.99	510.11	207.67	290.16	244.58	280.18	190.08	202.27	567.16	232.26	488.46	205.13	143.07	186.54	279.72	312.78	153	221.5	174.08	281.55	274.68	220.56	325.79	439.7	212.15	199.31	199.2	335.52
201637_s_at	FXR1	1136.38	798.68	828.13	869.87	758.24	918.1	898.83	1221.64	900.4	820.72	759.78	1600.84	1028.02	587.63	630.76	954.28	817.86	1081.78	503.06	855.89	843.91	1156.72	738.81	812.24	605.12	903.15	661.84	525.56	966.19	725.51	1153.68	618.9	516.88	547.31	623.62	1121.11	532.29	704.68	868.82	758.13	1018.74	666.03	917.44	1155.46	761.92	747.2	626.21	931.21
201639_s_at	CPSF1	479.46	665.44	451.42	202.85	641.95	182.11	369.91	410.8	482.71	389.03	285.33	607.1	557.93	408.07	357.45	784.26	706.57	292.46	1141.95	466.22	490.65	521.89	265.07	503.03	253.04	254.16	200.05	209.89	381.16	279.85	471.6	475.51	371.03	276.16	203.65	260.05	486.28	705.53	250.32	538.51	583.49	303.03	209.39	445.37	577.14	139.54	257.47	393.76
201640_x_at	CLPTM1	234.21	212.58	173.24	242.85	222.02	283.16	226.41	119.72	155.29	182.33	177.34	314.42	255.37	179.34	288.88	259.94	179.69	123.38	375.59	316.48	164.79	128.26	120.17	150.91	269.07	142.24	142.18	220.6	200.28	243.83	175.75	254.92	212.74	199.98	219.94	167.17	209.54	183.03	155.49	188.84	220.86	312.97	200.11	178.96	129.37	106.65	189.82	158.57
201642_at	IFNGR2	961.91	659.46	326.14	614.13	1163.23	579.39	745.53	487.04	772.49	829.89	1211.69	719.36	1056.79	751.41	917.3	696.68	459.32	661.48	691.74	1035.68	607.54	599.63	648.07	549.64	760.34	1018.29	840.3	753.74	409.22	786.3	580.49	755.49	768.37	796.33	824.88	688.85	921.99	780.38	805.4	696.51	465.12	658.96	649.49	469.73	560.22	882.23	1076.38	942.45
201643_x_at	JMJD1B	234.45	389.43	293.3	360.61	348.03	277.2	437.95	211.64	183.11	290.69	361.73	284.87	301.48	332.95	525.66	389.73	399.81	320.54	283.51	328.26	472.87	512.8	226.2	204.09	277.06	300.38	295.45	276.56	400.59	343.21	540.85	253.64	257.71	351.43	511.25	353.24	353.96	373.38	366.11	306.18	324.76	284.21	308.56	380.52	193.55	228.38	353.74	239.39
201644_at	TSTA3	305.84	446.74	388.55	287.18	466.39	230.33	300.2	272.08	313.06	382.41	298.2	365.43	371.56	200.12	234.11	488.83	435.15	232.88	436.26	339.19	282.52	351.48	193.76	394.03	276.22	369.07	330.38	690.99	211.68	223.23	298.74	264.01	475.72	315.33	143.41	181.74	319.36	532.88	141.66	611.26	272.58	294.84	166.92	320.54	870.25	189.61	277.77	416.32
201648_at	JAK1	915.02	1014.03	743.99	687.92	1012.7	1417.24	1185.14	860.52	1133.65	1305.75	1594.09	1059.64	1153.64	1451	1101.56	1000.68	824.84	852.8	983.28	1226.18	1094.4	831.96	1017.39	879.25	1451.46	1016.09	919.04	1000.02	1413.53	856.04	793.81	1233.91	1092.91	1276.41	1052.73	1220.67	1370.27	691.8	1999.86	810.24	2615.29	1246.28	1037.51	760.01	711.76	1301.27	942.47	1314.12
201649_at	UBE2L6	1126.72	1128.01	190.5	690.54	992.8	372.63	1228.85	840.15	907.54	626.86	1341.93	831.15	302.81	393.51	1425.51	1082.08	1007.6	678.45	792.83	930.28	728.18	755.02	553.52	367.71	1393.07	398.83	849.51	411.84	332.17	885.06	286.26	337.54	268.39	391.73	468.98	706.19	741.32	455.83	616.94	410.76	307.59	305.79	1247.53	1511.37	1069.75	443.95	674.24	1549.35
201651_s_at	PACSIN2	620.89	791.81	662	554.5	820.28	582.14	743.33	502.97	780.23	750.09	1015.93	1071.49	1609	692.59	794.02	672.1	718.83	1373.31	1455.95	573.21	710.27	733.52	911.55	616.28	889.76	790.98	839.38	1308.32	665.52	1219.17	830.03	764.18	715.94	980.72	505.12	1214.76	907.37	1131.61	748.07	1802.41	626.51	1330.52	745.64	918	495.08	533.69	702.24	1939.98
201652_at	COPS5	488.53	324.9	547.29	515.63	637.99	609.15	305.32	522.56	435.23	566.25	403.76	289.21	364.61	199.11	344.27	400.66	563.78	399.73	249.54	313.66	993.23	530.83	506.85	260.23	254.29	364.31	457.64	386.1	150.03	227.57	1099.78	271.53	495.29	244.63	199.48	281.46	394.18	563.65	248.78	1148.62	224.98	275.31	602.04	359.48	533.44	576.18	803.48	427.58
201655_s_at	HSPG2	627.04	769.7	750.97	678.99	481.2	674.03	548.2	379.36	499.9	505.16	606.7	557.56	1092.89	2148.81	489.76	669.29	476.09	545.33	622.27	537.37	670.12	370.24	1053.48	920.12	784.37	543.03	707.98	913.01	488.74	743.93	489.43	813.37	852.28	1805.06	1083.18	613.06	969.9	1018.11	451.19	593.34	661.67	1031.99	546.2	476.35	480.27	663.84	690.69	427.19
201658_at	ARL1	445.4	225.18	228.88	282.97	171.82	291.47	195.61	315.11	253.68	274.61	248.34	718.69	332.04	244.22	342.16	255.08	286.45	327.99	168.03	169.26	304.88	366.04	241.53	256.97	276.34	551.4	232.31	591.79	149.08	331.83	337.9	138.32	247.45	309.96	261.55	156.6	183.3	361.06	302.34	378.37	246.84	285.37	281.76	234.17	596.32	376	302.78	319.05
201661_s_at	ACSL3	220.04	228.48	177.92	211.14	113.42	115.52	235.15	263.02	331.26	644	312.11	310.37	355.5	209.64	188.48	220.37	102.11	490.43	280.84	115.83	316.07	255.1	513.41	362.69	339.23	548.31	630.12	553.28	201.73	280.89	292.69	322.07	227.45	219.49	178.74	235.05	125.26	298.06	207.83	437.86	200.37	501.35	338.55	705.12	206.58	876.27	570.19	182.66
201662_s_at	ACSL3	339.08	331.88	149.93	623.54	302.41	459.32	293.58	414.64	258.24	1602.3	555.53	561.28	683.51	242.74	262.34	385.85	371.09	424.26	970.75	451.09	300.75	403.64	592.37	439.28	356.67	672.01	974.88	948.44	384.37	547.85	548.12	426.2	434.17	399.8	291.76	657.31	261.88	419.58	132.93	547.71	638.74	967.08	454.3	1202.8	342.19	804.61	908.69	379.35
201664_at	SMC4L1	827.04	627.81	529.01	737.68	577.72	588.42	921.15	880.25	640.65	661.55	471.3	739.84	821.84	200.65	400.06	777.9	284.05	1338.89	780.65	157.76	1159.4	1477.74	409.07	689.37	399.4	706.4	446.67	232.88	480.54	582.85	795.38	533.1	214.86	230.89	416.17	717.11	266.03	628.04	290.48	480.01	818.25	578.65	648.32	800.86	719.23	333.98	408.77	466.71
201665_x_at	RPS17	6670.72	3731.51	5533.22	5253.52	3971.22	4984.85	4958.62	7056.54	6671.07	3431.72	4403.46	4740.96	3665.78	4025.87	4301.19	4116.17	3917.39	1757.17	2142.54	6918.04	6524.39	4505.81	3425.09	3686.64	2939.71	3510.25	3489.82	3969.78	2110.53	5275.75	3693.99	4807.13	4358.04	4159.71	5368.85	5252.55	3784.41	4107.51	6049.07	5168.79	3174.56	1191.13	8035.7	2535.44	8571.56	5236.28	2178.64	3983.78
201666_at	TIMP1	1790.86	3799.26	2556.75	2527.43	2931.94	2041.31	3012.02	1885.11	2433.6	2387.05	2717.97	2166.03	2377.27	3788.12	3988.07	2013.62	3320.2	1498.46	5946.46	2096.91	1634.39	1452.7	4108.75	2244.16	1991.24	1848.61	3384.92	2258.66	2085.43	4048.25	1917.69	2252.3	2566.22	4311.8	4085.49	2185.09	3781.35	4313.53	946.11	1900.31	1759.91	5456.06	2952.08	1709.46	1204.29	3512.7	3579.48	1863.65
201669_s_at	MARCKS	2288.57	1680.38	700.49	2045.46	1095.46	1426.16	1432.89	776.49	1708.95	1566.73	2560.78	1595.69	1818.82	2273.08	1470.55	1485.12	1198.33	1427.93	1451.75	1257.1	1466.31	1501.66	1354.71	1639.54	1183.68	1617.22	2054.82	1503.07	2726.13	1670.33	1287.51	2262.38	1249.79	1569.66	1735.22	1408.94	1431.18	1478.03	936.82	1219.81	1084.05	2199.67	1806.78	1416.83	1001.03	833.98	1698.08	1176.12
201670_s_at	MARCKS	1444.37	1143.35	392.82	1068.51	833.84	776.78	944.53	454.86	1451.79	1182.75	1521.5	1082.94	852.17	1384.5	1094.03	985.6	716.29	1190.74	928.78	847.71	916.46	746.39	908.19	1123.84	1104.03	1204.22	1251.28	752.33	1099.08	906.16	595.6	1798.28	949.04	929.59	1161.27	686.41	969.5	1045.9	850.86	712.7	636.51	1435.75	793.74	809.2	541.1	508.89	741.3	740.3
201671_x_at	USP14	467.92	231.54	449.03	272.43	198.93	318.92	382.23	319.3	502.93	480.1	313.06	498.82	382.67	260.89	451.24	394.26	376.8	638.01	423.87	346.55	478.85	345.41	528.7	445.09	351.13	501.32	457.96	241.91	351.98	397.5	187.75	451.97	354.81	295.59	466.15	210.48	391.18	163.57	453.98	531.79	146.2	781.44	310.76	649.46	231.66	492.92	345.51	239.82
201672_s_at	USP14	943.91	674.62	812.64	881.29	628.59	1152.88	989.95	715.04	1157.58	1530.6	984.92	1167.01	1075.85	427.66	1336.85	1145.45	1220.94	1263.01	1236.27	1156.44	745.28	1026.62	984.32	1035.72	1016.17	1044.28	948.2	426.25	1024.29	1613.9	705.73	1139.85	1001.55	698.11	1056.84	558.96	982.32	370.52	634.64	1173.09	596.96	2768.72	975.32	1710.48	600.98	894.1	791.52	618.1
201674_s_at	AKAP1	432.61	684.53	630.67	292.42	416.5	298.17	355.3	408.59	740.01	629.89	272.45	316.54	268.97	195.23	204.79	376.83	819.07	386.23	872.28	418.91	466.24	419.13	1010.28	604.49	1039.92	843.89	471.35	238.73	1324.14	484.66	325.35	646.28	275.78	380.9	379.01	587.04	241.33	546.21	235.21	472	620.18	422.67	338.89	547.59	796.06	570.54	543.67	554.79
201675_at	AKAP1	604.93	838.06	941.03	502.06	504.16	438.02	438.24	352.37	611.23	380.82	362.78	462.46	377.25	270.29	270.78	548.9	1194.61	285.17	1238.69	584.13	668.79	875.31	956.9	456.89	739.87	763.76	352.47	379.02	1898.1	767.4	422.67	870.35	324.05	470.32	539.18	901.37	312.14	772.53	259.21	881.09	701.88	454.36	485.49	729.71	688.14	434.46	945.47	712.24
201676_x_at	PSMA1	2031.55	1351.58	1785.23	1655.87	1312.13	2207.7	1315.62	1744.72	1506.6	1497.83	2690.11	1304.33	2151.14	876.33	1345.62	1486.95	1509.75	1525.08	790.18	1344.63	1720.06	2181.01	2062.3	790.35	1323.03	1760.16	1069.59	1449.41	687.9	1781.51	1203.8	2131.72	1563.95	749.51	1704.15	2962.48	973.82	1044.14	765.51	1258.26	1794.92	1311.73	1423.95	2176.67	1527.52	855.68	1415.74	1142.6
201680_x_at	ARS2	531.49	835.54	752.49	670.68	723.3	670.96	847.13	897.41	732.8	612.11	585.8	692.66	683.24	569.09	598.88	853.4	707.93	670.09	704.84	508.7	812.1	824.03	611.49	870.56	658.89	641.43	582.69	813.8	710.73	717.2	629.06	1213.33	521.93	721.14	800.19	512.76	953.1	653.04	824.81	621.92	1107.4	570.01	614.99	835.44	767.83	631.9	368.26	809.36
201682_at	PMPCB	631.67	380.51	594.28	719.04	304.06	768.72	442.31	479.19	609.97	539.6	486.4	276.34	353.01	358.21	402.96	499.02	456.82	475.38	240.64	466.55	586.81	584.5	507.08	659.33	323.93	556.52	358.93	344.3	381.7	533.49	545.32	491.99	536.41	402.66	427.93	408.78	397.15	361.96	527.92	488.81	306.81	344.81	497.28	639.37	863.32	451.11	387.31	408.19
201684_s_at	C14orf92	293.16	329.88	175.99	304.35	406.92	252.79	192.71	205.39	294	188.59	257.32	201.04	276.81	226.69	285.18	232.41	228.46	210.04	357.36	307.44	189.72	246.69	193.9	175.85	296.31	233.71	226.4	161.55	194.93	364.47	263.49	199.6	220.24	208.41	208.86	278.88	257.13	275.38	191.76	229.36	400.78	360.06	275.7	344.37	259.24	231.12	352.89	331.05
201687_s_at	API5	625.81	364.58	674.51	424.03	574.1	537.22	354.03	482.9	361.81	608.62	518.23	656.71	459.85	305.38	422.61	549.92	506.55	503.46	459.75	297.94	653.33	862.55	476.89	333.51	296.61	753.95	278.97	333.22	337.01	449.43	291.25	560.14	429.09	250.16	362.75	731.05	317.62	352.53	326.89	274.69	565.92	302.41	533.8	706.29	560.82	244.72	476.38	299.83
201688_s_at	TPD52	335.21	668.62	585.18	507.04	494.14	706.47	405.46	419.22	290.89	1074.46	438.06	475.83	547.63	169.91	473.58	434.68	1677.16	697.13	699.8	958.49	749.64	648.19	834.27	608.72	464.43	433.46	1040.61	389.3	608.29	456.8	468.73	543.47	721.93	313.29	152.88	362.72	813.85	918.5	364.31	1693.46	529.83	574.41	1225.21	540.78	695.27	1040.49	3414.16	1578.45
201690_s_at	TPD52	590.86	1198.05	1084.23	723.1	566.55	982.59	726.93	681.93	507.18	1467.62	669.1	756.78	756.33	300.9	533.86	834.71	1931.47	1491.03	1183.1	1090.15	1938.54	1076.65	1484.81	1256.08	855.02	944.88	1536.04	749.51	1070.58	743.18	793.67	776.12	1156.92	535.25	291.24	525.39	1154.03	1711.65	1037.55	2346.46	706.02	887.05	1726.48	846.59	1300.07	1673.56	4178.02	1636.24
201692_at	OPRS1	317.34	184.41	1449.48	165.89	374.17	564.85	307.38	493.01	202.69	236.94	126.22	193.64	160.53	150.99	294.23	375.22	324.14	279.57	215.58	222.82	488.41	222.07	226.1	161.44	253.11	179.93	116.51	224.43	159.89	207.87	336.75	189.22	379.21	143.22	120.19	231.92	304.7	184.11	111.88	286.04	245.58	264.32	234.1	260.07	327.7	185.76	158.82	201.42
201694_s_at	EGR1	352.19	1810.47	700.66	318.52	947.47	539.04	982.09	333.72	472.73	308.07	810.74	424.7	728.44	807.34	790.05	989.45	739.02	503.22	704.61	761.36	415.05	762.78	832.45	728.18	500.69	392.72	548.71	469.08	339.57	431.88	363.43	981.45	486.73	2323.42	1308.51	655.84	891.8	2195.29	516.91	962.45	1373.64	923.17	521.08	1138.3	147.81	699.61	931.44	360.79
201696_at	SFRS4	542.11	775.61	729	521.05	621.89	472.17	829.61	1034.4	848.39	834.07	671.26	639.96	856.7	671.96	620.78	700.54	549.78	1036.65	826.16	380.67	836.89	927.98	919.56	692.75	1072.76	418.38	572.17	491.62	499.53	623.89	554.03	1380.81	546.74	623.22	729.41	858.17	829.95	484.86	1016.91	558.4	1257.73	1123.09	610.52	672.39	576	398.06	306.46	540.57
201697_s_at	DNMT1	456.51	519.46	376.98	469.22	688.97	391.12	501.13	840.41	732.48	553.99	430.67	421.94	596.28	318.3	487.4	600.71	655.37	509.69	640.87	257.76	1007.19	563.08	559.53	474.01	597.99	450.9	348.82	348.3	462.26	629.41	319.44	363.52	384.99	290.31	482.6	358.5	463.12	411.48	425.57	334.4	1094.27	435.4	565.87	604.06	617.1	283.09	327.75	417.73
201698_s_at	SFRS9	932.17	708.23	548.32	1024.62	972.07	1643.61	807.75	1080.34	581.25	974.89	565.32	699.13	873.93	595.76	944.42	805.57	1723.49	463.58	721.12	867.94	863.86	776.88	589.67	495.89	563.72	681.35	690.42	823.38	721.7	1034.92	1078.15	611.11	660.31	529.69	771.7	540.31	773.61	628.58	515.74	639.91	1255.28	592.09	710.42	655.78	990.07	770.71	1662.9	1025.84
201699_at	PSMC6	385.01	235.43	331.86	412.45	304.95	389.72	282.47	189.53	343.57	241.46	486.27	276.08	311.76	334.49	205.6	293.21	288.65	218.51	180.1	294.57	373.69	494.54	272.03	171.74	220.79	249.19	379.48	352.87	242.19	545.85	404.22	462.3	235.22	257.48	177.74	479.43	238.91	374.47	251.95	388.64	228.79	297.66	492.17	472.95	472.98	415.75	379.75	253.49
201700_at	CCND3	356.31	368.9	307.31	237.79	353.76	332.71	319.16	441.6	343.85	177.69	383.06	389.62	297.72	304.55	398.95	419.02	195.73	216.51	268.07	428.18	336.47	437.97	284.13	182.34	291.33	181.76	265.62	361.65	209.62	357.17	228.07	259.22	374.07	331.88	403.3	503.04	664.9	438.21	276.4	281.67	252.96	435.63	355.76	282.34	346.44	164.53	310.6	348.13
201703_s_at	PPP1R10	234.86	240.6	171.56	238.05	383.78	273.22	304.89	137.85	224.37	202.27	225.7	333.28	292.44	235.79	230.87	488.2	284.81	187.39	272.07	218.8	280.47	316.55	160.46	152.74	293.17	159.47	286.69	368.57	303.18	182.33	269.09	593.94	293.87	300.44	253.7	231.99	298.34	265.27	362.64	200.08	366.4	253.47	188.74	195.03	211.14	388.35	208.72	294.97
201704_at	ENTPD6	309.82	408.28	399.32	309.78	540.71	514.2	409.63	302.06	175.9	246.75	223.58	249.99	226.89	280.62	493.76	262.91	357.63	270.86	256.49	346.64	223.37	325.86	608.94	114.4	296.87	394.28	198.87	276.22	217.27	326.15	233.16	428.98	319.35	306.17	500.25	389.2	293.77	494.99	108.7	378.44	652.73	293.9	212.43	464.2	239.97	154.33	200.06	441.42
201705_at	PSMD7	497.95	374.48	554.53	560.44	611.68	456.33	501.63	665.77	605.48	368.64	656.4	563.21	597.42	371.9	518.1	478.78	364.53	453.71	380.11	484.97	434.46	281.37	599.33	438.4	548.54	425.1	594.72	1021.7	572.95	698.74	359.88	432.7	631.84	363.18	425.89	415.78	536.31	298.12	344.2	450.62	211.77	547.21	508.73	317.45	533.38	369.82	691.98	461.03
201709_s_at	NIPSNAP1	506.5	284.84	341.34	424.21	583.89	861.08	400	997.95	433.53	492.69	244.42	581.36	398.36	240.58	512.02	595.37	561.66	399.86	443.15	736.83	570.85	306.63	394.78	813.5	403.02	302.07	642.67	309.37	362.47	580.92	538.34	336.38	589.92	386.39	328.78	298.42	473.56	329.54	185.51	852.15	381.8	526.97	412.62	246.99	790.12	500.97	728.92	348.75
201713_s_at	RANBP2	341.59	393.92	580.94	601.01	573.88	748.25	408.35	459.31	492.2	470.27	525.21	318.64	520.55	322.85	429.6	409.78	411.29	450.09	227.09	319.22	385	455.85	451.09	298.4	389.66	463.23	1052.23	500.65	500.9	433.48	386.75	361.31	271.37	366.56	389.55	243.15	310.13	380.94	367.89	567.03	598.48	507.6	398.79	594.13	231.1	325.86	500.93	461.8
201716_at	SNX1	355.95	312.04	221.55	561.49	286.02	406.53	260.97	437.69	357.01	134.83	450.05	381.5	384.36	345.45	440.24	261.72	277.65	224.84	341.22	320.52	231.7	212.21	181.6	161.68	310.49	274.93	315.31	332.3	249.17	446.16	189.13	209.2	301.67	288.89	345.98	397.12	267.28	332.78	279.28	210.65	256.3	147.04	292.56	238.29	188.51	216.88	224.95	471.64
201717_at	MRPL49	656.1	497.98	648.43	393.25	399.35	762.13	594.61	438.84	544.81	657.92	467.67	447.8	458.06	377.87	466.42	487.14	520.16	295.07	631.04	603.68	348.51	347.28	566.83	587.95	391.19	517.3	509.99	707.2	557.79	684.29	405.67	759.29	632.28	450.23	421.02	592.07	566.79	557.69	272.4	394.73	749.74	358.44	461.82	772.11	565.86	442.9	767.15	663.93
201719_s_at	EPB41L2	696.73	782.2	1952.48	362.34	346.62	916.97	560.88	182.26	430.97	443.19	833.88	1105.51	475.34	806.48	269.67	392.95	554.99	368.25	534.46	302.66	827.06	1933.63	850.16	565.89	415.25	966.01	244.98	407.81	234.91	670.76	253.67	854.26	431.63	703.43	432.17	395.88	588.51	343.48	222.86	832.4	116.32	538	268.77	387.08	168.04	177.3	343.23	133.59
201721_s_at	LAPTM5	3346.67	3116.87	1160.81	2808.69	2711.76	1350.65	3104.05	2075.01	3365.08	2077.97	3883.82	2906.7	3124.54	3626.47	4647.09	3370.92	2192.41	2587.51	3055.3	3307.07	1997.02	1127.04	1649.84	1476.89	2053.48	1969.6	1890.92	1539.31	1491.13	3542.57	1157.86	2138.16	1707.78	2136.09	2214.24	2773.33	3515.24	2054.69	3721.34	2055.21	676.32	1649.44	2829.82	1045.55	1070.96	1131.64	2221.13	1935.36
201722_s_at	GALNT1	516.98	225.17	223.27	334.04	547.61	661.72	253.17	273.4	197	313.36	445.68	372.39	401.63	358.98	689.12	231.85	205.64	272.12	205.16	450	331.8	212.11	346.84	430.15	180.14	561.95	357.43	567.9	612.52	626.01	340.79	350.89	680.02	260.53	273.27	305.85	386.87	226.32	260.17	355.81	121.34	661.02	428.1	326.73	217.51	283	573.85	368.88
201723_s_at	GALNT1	363.75	223.16	171.08	227.95	313.65	371.27	178.46	280.46	242.45	371	297.2	294.57	309.8	287.24	536.69	182.94	173.27	271.1	158.49	334.72	217.88	158.34	365.73	424.98	194.81	692.7	361.8	353.8	404.2	543.24	280.17	311.03	477.4	238.31	277.36	227.3	317.74	194.34	245.68	262.52	120.91	553.91	307.67	286.33	224.47	270.72	359.72	319.28
201725_at	C10orf7	760.17	624.71	575.05	1530.22	1107.14	984.17	621.32	878.43	1559.28	1058.21	458.37	682.88	507.92	283.81	1356.05	1040.76	1083.31	901.74	1243.29	1268.96	678.07	520.92	573.95	509.26	911.48	709.95	941.82	691.2	556.75	377.09	973.97	595.12	993.02	265.01	233.11	554.23	950.24	298.63	527.03	756.97	375.99	1173.07	495.4	555.55	1265.78	491.1	257.58	446.89
201726_at	ELAVL1	935.3	1011.59	1038.33	1145.55	1287.15	1133.56	1039.56	1132.11	1004.33	975.39	833.11	1163.15	1088.99	654.91	949.79	1226.19	1290.83	1058.82	1161.82	897.78	1293.97	1045.09	907.93	913.08	1070.17	881.74	920.1	998.98	1139.39	871.11	1190.41	1046.49	989.78	764.09	1252.35	681.25	1072.1	722.4	631.12	764.12	1408.79	1036.17	1056.66	1053.88	785.01	771.78	945.58	1004.84
201729_s_at	KIAA0100	438.76	279.05	327.86	355.87	296.82	456.8	501.74	333.23	558.99	348.66	209.13	354.3	315.36	356.4	349.76	415.01	281.44	229.77	314.42	347.7	415.66	524.52	447.31	354.65	296.87	328.79	564.72	656.16	1120.32	270.2	314.94	351.34	263.96	538.97	417.65	249.64	743.82	363.87	304.79	274.43	345.96	315.32	450.57	602.68	287.19	1270.43	304.06	423.51
201731_s_at	TPR	724.41	720.21	472.51	732.14	1018.39	637.73	1018.53	356.04	855.98	818.06	494.26	514.45	420.37	550.01	730.55	762.28	811.98	627.67	761.1	633.9	760.06	1067.61	675.38	424.99	543.6	478.98	430.55	409.19	804.49	470.85	998.67	500.37	740.53	637.52	899.93	730.63	574.34	746.99	474.54	452.42	1178.89	394.79	612.66	593.71	244.54	517.53	422.01	541.12
201734_at	CLCN3	225.62	185.04	452.9	242.25	206.47	235.71	174.61	142.99	217.6	146.73	321.36	209.16	255.48	239.2	258.33	262.52	182.02	195.26	250.54	219.99	254.64	306.52	214.03	172.13	175.36	163.99	394.26	598.63	449.49	551.93	394.15	359.27	248.76	305.44	355.19	243.48	187.78	275.39	162.09	466.54	188.07	234.97	675.8	287.93	191.85	395.58	542.25	442.59
201735_s_at	CLCN3	212.35	197.31	330.83	349.06	448.13	354.59	129.4	194.96	258.12	238.38	246.5	261.1	385.02	206.57	323.6	318.04	255.71	287.58	325.43	260.05	230.5	251.37	273.7	229.68	216.37	219.18	427.62	374.99	508.57	506.66	476.93	411.62	384.38	281.94	398.52	285.46	234.52	219.5	139.11	305.03	207.05	187.04	576.98	398.89	206.65	404.35	374.15	500.22
201736_s_at	TEB4	462.92	455.62	308.39	460.14	802.43	1005.75	409.65	877.69	244.59	734.75	485.21	1073.24	335.65	471.61	311.69	424.64	692.71	472.49	760.51	556.63	331.6	474.76	328.18	1087.09	389.35	380.23	484.74	568.55	1082.97	793.93	973.59	423.93	455.14	533.54	502.09	273.81	559.91	494.42	462.73	497.95	1305.5	394.86	1063.15	609.57	515.67	403.86	1110.96	865.55
201737_s_at	TEB4	558.33	516.15	603.2	249.82	245.67	643.08	445.54	1022.18	296.82	594.76	502.63	731.42	306.02	601.78	151.32	299.35	343.67	623.57	395.12	204.43	611.94	472.81	636.91	1575	610.11	801.83	535.1	684.58	1752.6	632.33	602.4	400.79	261.55	560.53	416.09	196.59	290.25	550.84	1174.08	577.34	889.34	366.58	947	549.09	926.24	806.34	1118.51	602.37
201738_at	GC20	647.54	587.93	831.16	602.39	522.98	611.92	500.39	831.3	468.2	469.36	915.63	480.39	447.77	658.1	601.98	771.23	455.28	376.85	457.71	525.72	653.75	881.87	598.82	370.51	431.1	377.55	493.47	575.89	591.79	533.71	585.02	563.47	355.05	604.37	290.23	571.71	450.49	710.98	568.36	700.83	576.68	787.75	772.3	648.4	482.42	778.56	590.92	303.34
201739_at	SGK	652.42	1232.21	481	1000.83	568.87	756.25	648.77	470.39	798.56	508.44	1391.28	739.43	909.72	1108.1	955.71	827.73	532.22	398.06	466.5	797.77	663.65	352.63	453.06	702.49	424.67	755.89	698.8	1001.62	3895.3	949.71	435.42	808.62	1768.23	1089.38	1764.64	702.74	670.54	657.4	404.79	986.92	834.97	794.96	765.98	1170.14	570.59	343.96	711.8	489.46
201740_at	NDUFS3	421.96	271.8	328.6	381.82	515.6	514.85	211.53	343.13	457.34	456.74	340.93	295.96	264.02	234.21	441.1	283.3	330.38	249.66	294.24	325.14	469.54	343.14	371.77	189.11	187.43	578.9	228.4	234.48	146.96	328.69	303.93	313.41	299.17	194.48	297.94	322.01	260.33	311.66	203.46	252.66	307.49	123.51	340.66	467.79	520.28	224.36	287.26	338.62
201742_x_at	SFRS1	684.85	647.22	897.24	632.36	803.67	597.58	556.1	489.69	562.62	560.13	660.68	542.31	1119.46	509.35	464.46	574.16	748.75	301.05	855.09	520.88	434.91	973.2	645.16	345.6	540.86	381.72	677.09	574.7	1182.56	803.56	635.08	842.58	558.58	636.63	888.68	1187.05	546.64	336.55	170.41	533.55	1054.65	684.44	1036.36	825.24	564.52	483.38	1107.93	824.07
201744_s_at	LUM	1503.68	1149.84	1686.85	2595.16	880.63	1491.34	619.95	824.11	1737.45	650.62	3920.5	1818.44	2047.13	3078.08	1517.95	870.53	1317.28	1621.2	565.32	1185.98	2523.19	671.2	1806.64	2126.65	863.37	1371.83	3143.25	3359.7	2261.75	1324.98	1999.28	2233.54	2808.93	2384.1	1973.22	1697.02	2348.38	2498.16	517.66	1966.9	250.92	1872.43	2973.37	828.17	1665.94	1716.23	3141.8	1425.48
201751_at	KIAA0063	496.9	467.12	620.7	513.89	737.12	501.96	475.54	545.21	478.37	634.28	510.06	643.6	781.24	389	504.97	503.64	623.12	860.6	661.96	435.42	497.51	753.58	584.62	622.5	601.72	582.33	448.46	479.36	485.62	419.93	378.49	612.83	637.05	519.27	338.78	785.6	484.35	599.82	263.96	536.04	351.88	1100.52	366.03	557.81	494.37	515.9	369.02	685.37
201754_at	COX6C	2408.4	2471.31	2982.82	2160.54	3601.08	3346.09	2001.37	1682.01	2758.57	2249.19	2877.07	1590.67	2506.8	891.14	1969.85	2051.69	2706.54	1635.48	1683.37	2604.87	5178.68	3189.31	1693.43	1773.22	2087.99	1920.74	3780.85	4212.89	1825.81	4215.87	6327.96	1487.13	2584.79	2435.33	2174.45	2504.13	2817	6499.35	1577.37	6385.9	1717	1113.07	6023.3	3872.25	8599.23	2648.89	12512.7	3609.4
201756_at	RPA2	281.86	164.35	303.5	255.67	234.92	359.98	228.25	344.48	314.52	190.17	223.62	184.97	231.47	179.77	281.5	169.32	209.37	310.87	232.13	229.08	299.57	310.97	194.86	170.75	228.5	138.08	181.23	199.64	121.68	209.72	189.03	153.88	213.52	144.71	228.71	274.91	230.19	153	204.41	226.81	338.88	151.32	185.96	176.72	229.46	139.08	152.99	134.96
201757_at	NDUFS5	1179.05	1013.22	1131.43	1548.34	1860.14	2702.19	681.81	906.65	1577.13	1519.56	1402.37	1397.4	1642.47	836.77	1240.16	1187.21	1055.61	1241.34	383.37	979.67	1564.2	1083.3	1278.44	904.01	1394.69	976.24	960.9	1141.96	443.98	1447.9	1252.63	1178.13	1012.76	908.73	991.44	1194.92	1155.95	2479.48	768.66	1213.5	770.88	736.09	798.16	3019.77	1233.53	1258.34	967.55	1442.53
201758_at	TSG101	464.77	256.18	298.23	707.95	279.11	348.58	223.19	393.42	274.9	269.19	420.95	432.15	401.68	289.62	487.1	344.73	462.4	354.32	323.01	223.1	377.95	458.13	430.85	194.47	356.24	408.83	326.83	327.63	233.66	431.92	312.91	604.2	555.46	436.39	347.14	1062.9	484.52	439.96	231.93	268.43	483.1	399.33	286.83	499.45	461.43	253.06	498.91	353.14
201760_s_at	WSB2	971.51	483.34	547.45	900.57	498.87	1075.87	575.93	708.47	692.62	773.87	764.7	745.38	2012.82	686.14	785.49	952.26	1119.48	855.9	760	656.55	891.73	970.81	825.34	1217.74	550.98	888.7	844.14	1134.26	933.1	929.1	835.05	876.91	738.23	588.5	1109.49	630.37	771.7	802.87	306.21	582.08	951.25	1320.83	938.11	537.67	719.02	736.51	1616.31	648.19
201761_at	MTHFD2	1025.78	605.8	1454.34	570.75	710.69	1067.7	688.96	644.6	1384.52	1215.77	819.67	1131.44	912.3	196.09	598.44	1258.24	1173.83	1090.78	892.53	832.41	1695.13	951.69	586.37	750.93	529.81	522.81	881.67	698.58	1082.85	1190.78	917.97	901.57	396.32	471.98	298.71	526.25	604.74	785.04	662.45	1473.17	925.7	896.03	1645.74	1918.8	1301.52	1028.86	773.81	1001.6
201762_s_at	PSME2	2013.54	2456.61	669.26	1637.1	2979.88	1374.38	1663.65	973.14	2920.93	1658.49	2995.12	1147.1	1162.49	1077.16	1776.29	1888.21	1643.42	1135.31	1552.02	1201.75	1008.26	1193.95	746.72	563.24	2272.46	1095.07	977.76	773.13	555.95	1878.39	912.4	698.16	572.9	823.51	687.54	1766.94	998.4	1375.13	1383.08	975.16	1694.21	619.84	1850.2	1389.11	901.95	908.09	1061.93	1706.71
201763_s_at	DAXX	203.95	236.4	200.25	128.81	294.49	257.01	261.24	334.9	153.38	153.6	175.58	322.36	270.31	190.12	202.51	286.19	191.55	287.42	183.61	145.56	245.21	434.99	219.48	195.14	355.78	215.52	164.65	131.77	195.73	203.06	180.55	196.46	224.49	136.99	149.87	240.84	356.68	144.18	403.45	184.43	409.58	225.93	200.08	169.52	229.58	200.89	131.05	222.9
201764_at	MGC5576	583.77	292.42	436.1	360.96	311.63	435.59	188.86	393.66	212.16	218.82	194.19	241.98	265.52	159.57	387.17	259.64	297.04	253.98	302.97	273.06	291.95	265.89	307.6	221.02	200.84	267.66	143.42	228.35	338.73	386.78	310.69	198.69	264.54	218.67	302.98	665.18	577.51	370.71	178.28	476.01	324.57	269.49	241.86	281.4	491.08	273.21	404.63	300.59
201765_s_at	HEXA	497.43	389.23	239.64	427.46	392.43	381.95	380.42	398.41	485.47	346.96	521.05	208.98	543.13	455.62	460.95	336.97	316.59	303.74	384.16	598.84	298.34	316.55	356.5	294.33	483.17	349.13	414.73	325.7	299.36	563.44	264.83	341.27	363.65	392.3	403.3	663.08	494.69	465.38	256.6	454.05	277.18	363.32	586.46	428.68	316.5	226.57	399.1	371.51
201767_s_at	ELAC2	199.95	206.45	246.33	200.99	196.71	211.03	177.22	171.93	243.49	125.64	178.8	136.31	146	189.25	156.16	244.64	210.57	156.87	117.45	220.63	258.92	280.08	204.99	147.34	228.64	230.54	336.14	197.1	139.67	195.42	159.47	182.73	146.33	202.21	186.11	124.9	290.43	137.03	182.73	228.95	171.4	174.82	161.71	240.87	147.12	125.1	168.01	281.32
201768_s_at	ENTH	203.82	230.34	208.15	298.74	369.54	282.99	201.69	185.03	224.65	482.51	249.11	289.27	318.27	193.55	337.41	301.4	284.16	213.62	256.51	375.81	146.25	226.14	202.04	152.8	263.96	165.39	318.64	198.73	249.69	265.61	242.6	171.45	195.07	217.11	274.82	249.27	256.07	215.08	174.4	181.76	184.93	225.44	234.81	157.18	182.01	244.23	299.12	191.23
201769_at	ENTH	457.93	408.53	483.36	675.9	382.63	505.29	461.06	263.97	297.65	709.25	555.8	520.07	594.88	415.9	550.86	738.74	390.22	422.98	493.46	689.21	507.97	515.54	344.99	229.32	345.75	274.78	539.53	460.89	596.47	535.1	528.6	317.54	390.71	403.79	464.75	481.07	335.76	380.84	392.6	398.11	240.89	428.7	486.63	294.97	281.94	472.64	670.31	285.28
201770_at	SNRPA	514	607.07	785.22	534.1	863.25	563.98	888.83	656.69	719.81	658.14	390.91	690.33	719.83	393.4	562.6	656.59	702.75	660.18	1069.65	790.21	676.55	636.94	589.73	614.27	675.77	596.66	341.23	355.13	736.85	601.45	497.23	619.27	395.72	368.16	674.4	503.32	553.65	500.38	578.48	504.14	1188.23	512.76	556.16	553.25	401.77	418.31	385.73	447.87
201771_at	SCAMP3	562.83	563.43	365.81	423.44	660.36	437.8	438.59	372.86	336.29	499.71	361.99	514.02	433.45	255.07	579.31	1292.63	716.07	434.02	776.95	594.81	478.61	404.88	274.39	303.52	467.02	459.13	1012.31	342.74	304.14	440.46	679.15	461.35	781.54	280.83	604.24	442.57	647.86	474.23	246.21	342.6	288.83	681.68	368.72	559.99	491.44	347.81	414.14	508.87
201772_at	OAZIN	415.42	393.38	411.68	321.93	219.1	649.64	341.07	356.06	470.55	642.53	352.64	279.28	458	273.35	246.69	415.92	582.33	371.05	728.28	540.78	662.71	784.31	426.6	418.12	281.53	323.7	404.61	497.42	501.69	650.18	617.92	320.74	317.97	258.18	216.34	293.16	609.74	434.46	230.91	1017.58	235.44	443.89	651.1	658.09	880.39	459.62	617.02	436.37
201773_at	ADNP	682.45	879.3	693.45	1113.93	861.37	1079.94	602.77	782.99	544.91	801.23	729.34	518.74	636.45	466.26	561.86	720.37	960.89	580.43	882.87	356.38	571.98	959.97	840.97	544.42	893.45	582.35	1481.55	655.31	2141.95	551.22	1211.82	590.78	540.12	768.47	831.79	585.98	492.14	746.05	360.89	819.93	1138.97	667.4	1134.42	921.15	530.62	623.76	1058.52	994.15
201776_s_at	KIAA0494	221.22	176.83	288.93	228.87	210.25	357.04	190.42	230.49	229.99	260.26	402.57	260.1	479.58	256.36	244.5	266.48	220.12	269.74	189.81	292.16	256.71	212.48	227.75	182.15	438.41	289.93	226.85	363.98	439.74	192.35	267.9	284.96	293.95	304.9	169.91	346.76	242.54	205.65	159.74	324.66	271.32	516.18	409.94	184.1	235.35	172.63	384.07	303.37
201778_s_at	KIAA0494	661.1	597.9	737.58	522.45	542.16	567.1	588	574.36	625.12	666.22	749.46	638.04	959.48	839.91	778.44	578.31	536.64	712.2	443.83	809.64	746.95	616.44	788.45	641.96	962.98	766.43	509.3	870.97	1098.92	533.95	597.3	853.25	699.04	931.41	639.55	969.69	686.19	603.23	776.77	683.51	513.85	987.05	721.58	420.5	548.09	740.24	724.74	729.47
201780_s_at	RNF13	642.21	229.33	366.16	305.63	239.03	225.43	397.61	358.46	294.71	188.88	654.17	544.89	387.1	365.05	302.06	329.48	285.75	425.52	349.79	205.98	629.53	332.25	259.58	207.67	347.55	381.51	275.82	405.1	496.26	450.25	250.67	371.65	206.77	246.12	138.99	346.43	257.06	428.14	189.28	415.08	139.78	303.45	484.03	393.75	275.97	247.61	487.22	246.62
201782_s_at	AIP	203.4	215.66	205.95	161.52	196.68	225.08	231.54	150.15	182.26	110.85	232.68	193.87	170.54	262.81	221.4	172.98	251.28	146.77	174.17	137.74	191.5	153.28	173.49	196.43	145.5	204.77	161.55	207.04	166.97	195.4	143.36	285.06	223.85	168.16	179.43	222.55	203.17	174.96	319.88	169.82	208.01	192.92	269.04	271.63	217.44	190.8	184.52	196.53
201783_s_at	RELA	478.63	443.14	289.68	359.91	457.19	340.97	462.68	252.63	386.86	380.4	400.81	706.38	427.24	312.97	391.27	468.9	585.64	303.35	527.51	501.97	287.32	268.03	361.55	445.38	480.27	402.74	236.39	341.43	463.5	362.39	279.27	741.48	508.27	403.03	459.24	381.14	488.01	481.96	324.86	207.43	558.2	450.18	330.2	492.84	192.25	333.35	362.22	381.7
201784_s_at	SMAP	886.04	492.9	564.19	472.91	461.97	790.13	459.71	780	621.62	702.89	937.63	424.7	702.91	518.14	592.53	719.98	797.31	591.34	398.53	453.36	733.59	884.7	848.5	312.95	390.63	805.8	603.11	476.78	358.66	590.16	656.52	619.72	697.07	489.65	554.86	1107.09	490.22	619.07	348.95	555.61	957.25	540.36	748.34	1056.39	935.88	357.65	743.7	698.84
201786_s_at	ADAR	2378.07	3696.26	991.93	2284.52	5808.91	1477.24	3844.27	1698.16	2252.58	3211.48	3242.69	2375.33	2005.42	1640.01	2887.9	6282.84	3454.51	4308.71	2709.66	2381.9	2503.82	2688.42	1609.3	1518.9	4364.56	1729.18	1911.71	1457.06	1987.13	2645.68	3031.52	1668.85	1996.72	1963.39	2762.08	2744.98	2810.83	1938.01	1613.34	1524.87	1959.83	3256.15	2930.75	3560.13	3158.17	1838	1700.01	4149.28
201788_at	DDX42	396.18	722.07	386.15	413.49	690.99	412.66	553.81	508.06	516.21	988.55	482.28	449.47	738.32	484.32	351.31	667.07	614.36	456.76	603.95	517.4	541.69	595.56	960.68	437.04	607.8	432.48	396.05	449.13	753.2	576.74	649.57	493.05	404.26	497.81	444.58	800.85	469.06	656.09	580.01	471.03	689.14	581.8	519.25	721.58	526.27	529.26	541.92	512.08
201792_at	AEBP1	684.8	1300.13	1004.75	1655.2	727	555.15	584.06	511.69	863.65	351.23	2621.25	761.01	2108.72	2756.51	1402.19	482.38	1361.42	1555.3	890.45	898.02	1147.25	381.54	1586.88	2636.81	1145.86	1238.85	2096.72	2689.85	1375.2	942.88	1034.63	2220.05	2367.78	2315.24	2790.8	821.86	2360.31	3275.65	276.11	829.23	475.16	4289.16	1242.97	573.76	792.09	1686.33	1869.87	1276.72
201794_s_at	C1orf16	532.62	461.87	324.45	439.36	686.04	560.18	332.65	243.67	241.1	455.59	301.1	501.45	290.39	284.47	508.6	740.22	717.34	376.16	713.4	575.96	476.01	298.96	372.73	368.73	581.22	254.69	353.97	318.06	633.7	374.81	617.98	331.02	482.8	314.62	622.2	599.69	473.75	351.3	419.31	501.54	546.46	299.19	351.01	352.94	162.07	263.86	329.95	315.76
201800_s_at	OSBP	313.42	273.7	301.68	362.05	229.08	253.06	298.97	426.11	297.94	351.69	285.66	476.1	376.99	314.1	484.08	313.91	372.25	311.31	371.56	323.54	598.96	291.57	450.28	391.81	318.38	505.38	402.34	445.78	290.99	324.14	300.15	477.33	428.6	331.26	299.79	258.87	290.54	420.18	340.17	277.94	254.71	430.15	316.47	497.72	526.58	512.32	356.47	530.9
201803_at	POLR2B	648.64	416.34	462.61	578.14	758.89	472.12	524.77	712.21	443.85	896.35	505.04	753.06	557.9	429.46	444.56	521.18	451.08	398.45	397.42	614.04	477.24	530.35	393.94	436.19	579.92	537.13	766.57	433.8	434.37	601.92	640.39	654.93	468.31	655.29	611.9	687.79	569.8	259.83	479.62	592.67	461.12	554.95	723.87	488.48	595.84	505.77	546.85	633.47
201804_x_at	CKAP1	683.95	432.05	1113.72	642.42	629.26	791.43	549.19	643.18	746.91	520.03	542.44	315.72	541.83	412.1	921.77	499.57	658.12	609	1188.7	552.97	823.7	549.35	643.71	337.91	693.98	706.53	471.32	357.89	608.15	478.72	518.7	485.1	415.67	395.8	403.3	565.92	736.78	314.16	402.72	844.89	603.95	628.43	494.28	949.89	1115.33	269.05	577.2	732.24
201805_at	PRKAG1	416.37	187.2	229.66	213.65	198.25	275.06	180.54	129.28	182.74	168.61	219.12	286.48	146.07	200.83	438.16	242.36	277.27	158.26	161.42	172.36	157.08	181.92	178.33	152.04	197.55	164.67	216.76	299.88	165.81	165.65	255.44	289.94	273.44	221.94	211.08	225.56	366.49	237.25	152.01	296.49	164.85	154.76	293.56	276.75	234.6	430.51	222.42	324.36
201807_at	VPS26	1068.22	701.07	720.84	1155.94	469.58	1234.05	826.91	408.09	502.36	1315.41	890.5	980.18	757.02	459.79	669.88	696.86	1366.23	561.35	436.16	1160.88	940.03	788.8	1294.49	566.28	634.23	973.96	654.74	745.06	388.19	625.87	760.77	941.74	792.39	675.31	396.07	494.82	625.19	546.55	365.3	555.23	353.13	893.57	700.51	721.02	704.9	566.91	832.27	616.93
201809_s_at	ENG	280.4	363.07	246.13	377.35	296.31	330.66	347.02	195.81	321.89	173.76	457.86	404.25	332.93	998.7	401.89	525.13	201.46	241.97	455.79	316.94	252.43	153.07	321.26	332.91	340.75	259.06	307.02	295.16	191.64	317.81	199.6	346.11	589.98	805.03	306.61	311.33	753.94	373.6	178.26	247.53	215.51	455.75	318.75	221.94	184.25	191.84	299.94	234.19
201811_x_at	SH3BP5	478.36	610	294.69	558.83	384.51	385.13	709.03	781.71	275.98	564.87	404.94	696.56	504.52	459.55	482.63	718	501.54	328.25	409.61	490.31	585.52	381.49	280.79	244.99	636.11	198.98	289.54	367.71	293.43	667.93	652.23	247.33	495.86	592.79	304.14	292.63	220.45	337.56	578.53	429.8	262.99	215.99	261.64	997.92	335.28	343.01	387.33	333.23
201812_s_at	TOMM7	998.08	479.35	1597.62	1133.13	803.35	1287.23	668.91	1754.13	1396.45	858.53	847.64	1117.76	1102.1	921.56	1093.61	1043.08	1577.37	713.45	299.98	1522.82	1113.5	451.09	1431.78	637.47	715.82	1132.82	918.08	900.43	516.92	653.58	1412.87	1400.21	1183.85	1245.5	899.31	734.37	1033.24	1183.32	1689.07	1073.13	434.42	375.83	1860.06	1072.8	2238.33	1594.54	905.83	833.04
201813_s_at	TBC1D5	149.43	239.45	482.78	129.02	220.37	141.66	184.39	499.75	336.57	366.35	247.77	197.33	331.24	218.58	281.87	309.86	102.88	316.13	336.12	210.44	435.76	207.1	360.55	324.66	444.93	242.77	294.53	194.62	274.52	254.18	238.07	279.22	219.14	264.42	156.91	308.73	206.22	275.08	593.3	190.66	337.3	427.03	196.51	149.02	351.28	330.31	173.55	115.18
201814_at	TBC1D5	200.64	243.27	523.17	184.43	243.84	180.8	159.48	291.4	226.33	243.91	285.22	238.73	426.89	244.12	374.49	383.15	158.63	198.87	276.82	207.11	564.58	289.93	292.45	205.63	236.45	151.69	241.62	336.74	317.45	290.18	285.94	283.88	244.26	305.02	172.6	317.79	283.36	359.59	408.14	307.15	233.36	374.05	271.07	206.72	276.33	258.23	286.2	102.42
201816_s_at	GBAS	291.47	253.13	408.58	664.84	504.97	692.93	202.02	478.9	292.74	410.81	490.13	419.51	318.07	287.75	287.65	325.63	460.08	383.47	439.12	142.83	460.02	434.9	430.63	357.64	389.66	479.9	806.02	370.36	358.99	239.65	633.27	454.04	449.64	322.46	235.28	247.79	417.99	337.53	148.06	626.11	310.77	347.56	824.14	249.59	530.64	375.9	340.53	544.77
201817_at	UBE3C	483.54	270.08	462.88	302.06	305.29	954.77	367.18	454.45	376.69	507.06	332.53	310.18	652.93	189.37	320.87	372.91	370.86	456.05	128.06	580.37	463.28	370.68	337.52	500.34	279.73	252.47	461.15	273.7	362.55	284.77	227.91	355.36	418.43	293.65	352.53	134.72	537.12	303.98	203.15	575.23	282.23	651.9	246.32	303.27	424.98	235.4	297.18	336.51
201818_at	FLJ12443	433.89	515.07	353.27	274.25	781.54	403.24	297.17	835.58	354.24	411.07	334.08	453.65	187.8	463.18	312.54	467.96	638.41	556.55	509.33	387.68	926.66	495.17	432.86	940.64	311.45	419.58	554.62	329.46	762.83	670.97	351.83	605.96	258.97	403.78	331.2	364.09	493.55	407.1	1017.74	862.94	433.37	343.39	383.73	390.68	719.71	838.31	524.85	746.76
201821_s_at	TIMM17A	428.07	280.4	222.31	534.14	756.35	576.32	236.7	225.84	420.19	725.17	361.59	190.54	190.73	152.73	327.26	477.66	396.96	274	371.98	190.81	286.54	413.33	302.71	169.21	281.11	330.61	531.33	382.07	318.14	244.78	509.35	125.01	381.04	191.72	245.26	385.18	281.49	259.82	109.96	626.72	290.7	158.88	510.29	266.46	444.49	350.72	460.67	424.96
201827_at	SMARCD2	314.35	345.61	183.86	232.08	406.3	281.82	305.28	238.08	300.46	277.41	236.27	244.87	293.27	173.4	210.57	460.42	311.9	199.69	419.25	198.64	316.07	254.5	298.36	204.79	349.55	222.05	230.29	272.05	260.49	247.2	447.51	249.66	204.21	189.62	188.38	403.17	219.04	268.7	258.06	264.69	269.26	183.8	260.26	266.52	338.73	237.75	216.39	244.11
201828_x_at	CXX1	490.06	734.62	702.65	1226.62	844.12	626.13	711.58	597.33	393.69	350.73	563.69	964.02	1032.98	914.1	1226.83	653.49	930.96	687.97	627.49	614.48	387.14	494.32	705	979.85	610.87	791.08	890.8	871.42	967.94	767.8	906.8	1092.33	1305.97	1002.82	831.34	988.45	1041.52	769.81	102.3	1006.51	952.9	1744.39	632.17	917.42	861.63	564.12	1191.62	772.78
201829_at	NET1	434.38	464.52	334.95	1012.41	541.02	264.83	299.67	257.97	642.43	488.79	396.51	623.81	361.45	466.17	781.48	544.57	668.11	719.25	583.79	348.08	551.43	911.71	559.3	520.16	498.5	424.36	511.57	372.19	664.47	216.73	381.52	489.06	384.09	337.78	302.61	845.24	858.03	642.61	208.6	532	222.6	443.15	195.12	1502.87	816.91	489.78	436.87	238.01
201832_s_at	VDP	907.05	488.49	387.12	637.66	634.38	463.66	549.43	439.9	392.3	642.86	768.44	870.52	614.86	622.03	654.1	685.07	461.45	491.98	382.28	1290.64	587.1	598.46	447.98	415.94	545.45	857.8	721.8	1374.24	539.62	763.51	505.58	743.38	618.57	789.21	608.98	867.25	799.75	427.32	487.49	628.38	283.08	897.91	832.7	517.88	892.93	721.34	860.05	902.48
201833_at	HDAC2	696.18	485.81	818.38	991.25	475.54	1113.43	434.19	691.51	624.67	746.21	688.83	775.11	356.94	287.85	558.04	519.84	950.28	473.57	499.17	864.62	648.63	1906.49	987.65	755.36	415.97	1082.81	644.84	700.99	1029	599.54	756.37	1488.84	754.74	349.16	639.06	443.1	1016.29	322.81	188.98	658.72	1051.84	620.53	706.52	671.62	690.41	591.83	501.28	451.08
201837_s_at	STAF65(gamma)	317.36	355.03	236.26	319.7	353.96	398.52	376.49	463.93	273.51	289.44	370.14	409.25	485.01	320.4	327.01	281.7	238.57	429	300.26	257.04	248.56	207.44	349.37	386.14	256.46	313.52	296.26	226.17	264.58	356.32	304.75	340.1	331.31	241.68	331.4	304.94	379.83	282.49	264.38	232.24	394.86	370.54	427.6	286.79	273.99	134.67	234.84	286.22
201840_at	NEDD8	716.87	773.56	390.1	649.88	993.93	788.83	406.78	523.71	825.62	537.36	658.37	453.59	565.29	493.21	743.8	553.4	859.25	416.14	575.73	656.75	479.13	660.88	370.06	334.4	578.66	569.39	638.77	485.1	335.44	598.67	781.27	495.69	566.07	395.09	367.89	674.9	570.49	885.94	563.29	888.92	1101.91	520.23	569.75	614.43	681.36	624.37	599.28	609.54
201841_s_at	HSPB1	1151.64	2478.04	763.73	2885.1	792.91	1535.26	700.62	1530.2	953.06	1401.72	1664.39	954	984.49	1260.56	1716.38	1011.54	2089.25	2161.65	1288.07	1372.35	1335.1	494.54	938.42	4665.39	1487.86	950.79	5300.36	4242.1	2648	914.47	594.61	676.26	905.81	2140.98	1419.54	2233.76	1408.21	1141.11	242.47	5780.53	745.06	5226.56	919.52	298.17	2037.32	2890.63	7013.92	4510.11
201844_s_at	RYBP	436.04	554.58	678.95	490.83	415.88	368.75	420.79	428.1	535.09	1055.03	362.81	266.74	299.62	459.44	528.36	374.04	302.33	1068.67	557.14	576.03	450.98	311.06	1066.88	622.9	790.84	622.75	1140.78	415.29	539.66	264.68	628.19	1090.9	546.45	576.88	392.55	288.58	443.73	663.17	992.07	677.08	610.51	361.95	360.78	488.12	796.47	600.66	295.94	271.59
201845_s_at	RYBP	252.89	269.85	395.37	316.33	182.14	419.14	322.14	161.26	176.97	443.05	426.35	171.18	226.3	237.24	259.64	249.73	189.92	343.43	376.39	336.98	371.92	383.52	389.64	220.11	209.75	218.29	565.45	398.6	346.86	232.19	470.64	531.33	226.62	293.41	210.83	186.52	267.37	339.94	338.16	458.11	275.81	299.08	309.51	331.25	341.12	192.58	320.93	210.22
201846_s_at	RYBP	267.5	475.43	463.5	362.35	335.04	352.99	360.34	453.19	445.97	993.19	381.31	254.87	268.96	317.78	368.76	307.65	314.1	653.45	556.67	483.6	344.93	343.61	883.93	619.24	710.06	405.13	1125.5	353.75	362.13	307.84	515.28	678.46	286.81	471.79	354.92	239.3	420.26	428.34	680.09	420.98	491.68	404.18	308.82	361.61	683.43	481.39	308.06	333.17
201847_at	LIPA	1346.66	497.78	631.56	553.66	558.37	433.47	668.98	393.02	491.79	314.53	1911.1	783.99	387.89	1144.86	2645.35	1194.73	538.59	358.68	604.7	907.17	648.58	594.47	460.45	406.83	364.02	732.11	719.91	1047.81	442.95	1024.6	737.89	323.16	754.85	775.22	491.7	761.85	753.94	678.87	474.49	820.45	203.84	283.24	812.84	312.12	716.69	605.7	1158.17	1034.77
201851_at	SH3GL1	184.62	215.57	235.3	204.86	296.17	213.71	164.1	302.65	170.83	147.43	171.34	182.47	261.01	209.5	196.19	231.29	311.81	187.77	249.89	196.14	130.74	158.96	180.22	322.71	209.99	205.61	244.29	247.31	232.6	157.24	261.57	291.67	257.07	248.45	238.36	146.88	206.59	244.13	131.9	174.38	159.08	337.41	148.83	233.46	200.48	204.78	171.36	170.58
201852_x_at	COL3A1	3022.19	4308.12	3468.91	7324.94	2951.75	3882.55	1775.25	2670.57	4914.7	2201.47	8192.81	3995.34	8444.51	10239.9	4167.9	3195.51	4618.96	6445.97	4170.78	4605.98	5062.51	2414.51	5657.97	9299.95	3174.24	4460.02	7398.18	7984.88	6865.48	4527.72	5131.74	8414.86	7218.99	8097.13	9332.71	5223.71	7769.84	7807.17	422.48	3881.1	2022.94	11537.4	5887.72	1663.85	3531.71	5511.33	8519.48	4224.56
201853_s_at	CDC25B	222.42	693.87	429.77	751.62	974.67	534.64	461.81	347.44	345.27	527.35	649.67	348.5	535.96	465.63	681.53	566.82	367.05	417.39	779.66	230.25	1223.5	1222.55	452.02	797.68	664.95	418.52	510.39	204.27	359.73	431.83	862.15	1521.81	281.37	355.92	495.41	965.42	890.08	574.08	286.22	705.35	1670.09	546.56	425.45	324.42	311.92	270.55	222.14	429.09
201854_s_at	KIAA0431	170.81	218.16	158.63	360.01	670.81	280.2	389.62	561.97	216.99	209.96	230.35	243.8	230.21	148.84	379.37	181.25	181.79	184.55	164.79	186.84	146.6	150.92	296.4	250.1	597.95	283.6	253.08	227.37	305.32	387.82	162.89	170.88	276.24	188.75	145.38	188.97	254.87	123.81	223.67	144.57	239.16	707.21	196.6	206.71	266.63	160.63	426.42	369.44
201857_at	ZFR	851.15	392.77	508.66	575.63	280.41	702.24	363.61	561.76	320.7	577.35	568.11	680.45	506.72	344.24	199.45	499.43	604.48	509.7	507.98	502.7	659.3	565.42	590	651.52	410.49	601.33	427.97	464.67	1087.39	714.87	643.28	472.41	317.33	417.97	403.3	425.93	312.2	370.54	272.58	600.58	454.06	391.33	586.66	675.01	455.47	380.39	839.04	474.93
201861_s_at	LRRFIP1	220.82	276.9	246.97	303.23	232.11	245.63	382.99	459.09	433.94	293.91	321.42	235.48	396.5	304.14	267.9	266.84	324.57	587.58	209.5	236.39	191.39	220.98	413.46	452.29	436.01	733.97	460.52	332.51	326.45	253.93	163.7	285.51	188.49	334.11	225.86	400.79	222.96	349.42	389.27	186.46	261.99	412.96	375.72	207.04	483.19	594.71	346.56	346.45
201862_s_at	LRRFIP1	304.37	357.42	434.25	464.87	219.35	399.89	497.45	578.76	509.52	246.78	494.17	269.04	560.43	450.86	302.95	402.19	434.4	832.92	360.42	346.46	393.46	311.72	399.31	433.72	289.81	898.61	531.95	551.11	558.3	372.79	254.6	333.11	217.99	370.55	338.89	606.2	237.52	455.12	619.19	325.73	263.55	593.92	489.25	280.93	540.27	746.09	541.63	450.61
201863_at	FAM32A	424.22	250.57	273.22	400.04	351.74	306.03	286.01	381.88	361.51	234.13	368.23	383.8	302.95	320.61	360.97	307.07	281.6	421.32	349.75	302.82	331.12	309.42	416.9	615.97	373.77	367.41	425.63	381.15	233.12	323.96	325.25	272.36	490.01	306.24	377.76	373.29	363.13	323.36	217.07	341.89	390.15	301.91	430.82	566.48	462.31	355.98	315.45	565.64
201864_at	GDI1	370.06	596.23	1238.2	390.16	533.82	430.21	529.56	720.9	357.95	543.22	428.09	410.1	631.94	639.86	576.59	496.32	630.23	415.79	451.93	505.19	494.35	441.17	380.96	481.22	387.34	281.42	318.34	365.96	457.71	531.85	529.99	491.53	839.92	614.59	487.72	609.86	570.95	638.63	491.37	519	976.21	731.6	308.49	454.9	869.57	363.1	957.97	575.75
201865_x_at	NR3C1	391.28	546.99	317.01	382.46	325.29	449.31	490.31	441.36	522.51	388.41	754.88	316.97	247.5	720.32	540.28	438.79	291.09	799.05	394.17	455.3	382.39	666.22	504.76	456.98	760.41	439.96	659.41	423.19	509.43	742.6	421.71	415.03	350.97	663.94	469.99	731.44	474.45	587.38	1103.26	394.23	239.73	524.84	592.67	217.06	403.68	258.16	430.19	295.63
201870_at	TOMM34	248.4	352.99	564.7	197.67	332.43	414.09	273.11	237.93	209.25	288.51	169.86	141.69	138.97	145.21	210.22	205.08	343.18	201.41	289.37	352.75	310.06	169.1	211.83	310.64	155.47	179.26	167.95	184.62	165.3	176.54	182.43	113.7	213.41	147.04	208.04	137.1	224.5	141.26	104.8	313.35	348.1	199.98	142.8	189.82	143.45	125.58	404.83	232.27
201871_s_at	LOC51035	409.37	291.55	297.17	426.17	257.21	390.04	333.3	362.99	360.59	248.55	299.69	384.75	293.05	378.71	335.27	277.6	375.07	186.95	226.81	373.61	328.49	244.72	314.45	302.3	243.77	357.55	217.2	270.63	206.72	310.92	151.77	390.01	250.16	293.06	334.63	270.14	370.81	307.07	449.36	204.82	344.27	176.63	225.92	362.59	172.99	336.46	261.85	255.07
201872_s_at	ABCE1	451.68	357.42	519.41	537.46	255.97	490.97	352.01	320.23	772.91	899.47	597.2	631.22	449.17	247.23	282.21	505.76	396.49	311.71	349.82	998.43	446.86	615.2	382.48	322.83	323.79	362.99	564.27	325.48	268.79	453.15	489.19	355.74	336.96	276.63	430.06	300.91	264.28	226.76	173.15	507.4	392.75	802.11	445.15	522.93	521.37	394.19	381.94	452.53
201873_s_at	ABCE1	289.09	209.51	316.18	283.17	113.72	300.39	224.18	156.89	362.95	421.3	306.03	341.97	219.05	154.91	133.3	346.04	174.1	186.11	216.1	328.57	380.1	303.58	200.6	177.54	209.35	215.29	320.26	217.24	199.93	330.51	265.13	195.94	180.37	134.62	179.83	128.31	124	137.51	158.33	322.81	158.13	396.79	260.16	276.38	292.3	235.42	220.8	212.32
201874_at	MPZL1	627.86	530.57	402.11	632.64	890.12	522.22	480.64	188.21	332.05	767.54	381.16	415.89	458.6	494.1	483.02	269.55	909.07	979.09	615.74	590.8	243.41	1032.13	760.25	405.93	1790.17	828.99	441.6	496.7	390.72	401.78	723.42	459.69	1128.94	596.22	879.81	358.37	351.76	257.42	194.23	539.99	256.56	415	455.45	710.48	403.76	582.76	460.06	610.32
201875_s_at	MPZL1	558.04	413.69	460.15	439.6	584.55	467.44	449.31	142.98	286.81	489.67	285.27	405.91	296.85	364.97	315.71	205.78	604.59	827.55	378.53	321.02	275.32	790.74	622.18	369.75	1486.34	736.7	316.11	367.1	358.22	286.5	562.35	392.37	820.22	375.77	443.16	219.83	239.98	187.66	176.03	473.86	153.9	296.42	315.61	478.74	333.16	439	304.6	389.71
201877_s_at	PPP2R5C	327.15	317	468.35	478.43	350.93	278.44	354.92	480.32	299.69	249.97	539.8	348.15	366.36	505.79	556.63	370.41	258.19	389.5	324.72	225.6	622.44	683.93	348.25	418.13	343.44	394.31	409.74	481.1	455.49	420.66	434.4	424.45	302.92	512.69	284.54	466.65	451.26	261.02	503.03	443.81	336.73	391.01	620.87	364.91	217.61	450.4	478.88	421.45
201880_at	ARIH1	366.64	258.08	196.91	446.85	198.18	279.8	573.66	265.17	277.6	410.05	373.79	223.19	434.13	309.76	253.57	376.08	230.92	254.88	257.44	192.06	487.78	360.36	277.05	356.89	414.56	238.84	308.84	321.29	287.33	357.2	224.25	443.06	315.33	380.87	345.86	238.81	193.72	420.17	302.7	289.73	205.1	265.33	590.22	358.28	240.04	272.32	293.61	251.1
201883_s_at	B4GALT1	274.77	162.21	244.01	282.27	443.03	381.07	324.5	296.1	239.59	297.73	126.2	287.86	170.71	407.02	335.15	209.96	360.28	163.13	323.96	200.46	149.32	181.11	123.91	174.78	160.39	159.1	212.29	199.53	151.28	200.37	198.74	159.53	221.14	214.89	185.2	190.68	261.89	267.68	203.08	288.32	122.87	422.89	243.75	177.99	175.99	130.53	170.12	175.64
201885_s_at	DIA1	1292.54	1174.85	1432.25	975.24	1258.5	998.52	956.14	906.42	988.43	1527.29	1613.94	1394.26	1551.38	1473.57	1143.89	1099.66	1038.29	2043.18	2840.46	1069.79	996.02	1172.46	1340.8	1619.36	1384.18	1295.95	1612.44	1753.98	1058.07	1601.11	961.4	1937.88	1884.03	1625.03	1055.63	1386.77	1822.74	1229.78	862.69	1548.59	765.15	2686.94	924.19	1057.34	1118.7	780.59	1348.46	1694.99
201887_at	IL13RA1	431.87	235.34	300.99	400.54	315.66	503	423.05	324.15	353.69	198.11	538.33	343.43	448.35	526.61	360.98	246.23	431.86	503.27	208.13	299.71	402.98	274.46	425.17	341.58	265.51	422.95	798.95	728.56	413.59	395.74	408.79	415.66	393.99	508.42	240.04	573.81	430.63	696.69	226.36	443	777.47	612.43	537.17	481.43	499.36	776.79	832.66	483.62
201889_at	FAM3C	623.64	255.54	303.53	322.05	235.78	592.35	296.14	359.93	341.87	491.7	543	332.41	603.13	547.69	262.81	510.87	482.76	447.34	294.74	468.06	444.6	274.71	234.87	540.98	318.22	423.06	320.49	253.23	736.46	795.18	464.2	256.09	427.64	383.15	283.4	237.79	364.3	240.61	200.59	579.9	160.46	836.53	539.16	1162.67	619.9	288.84	377.08	217.28
201891_s_at	B2M	7095.41	7095.41	4975.98	6623.59	7472.02	5138.02	8300.7	6448.78	7796.93	6448.86	8561.82	7549.41	6408.48	6848.53	7429.77	6815.69	5873.63	7008.15	6602.53	6272.85	6717.49	7060.55	5631.8	5252.15	6780.79	5847.39	6892.43	6304.24	6286.78	6971.67	5932.09	6260.55	6002.81	6077.65	5514.66	7247.53	7002.8	7340.16	5364.98	6664.2	4529.52	5281.23	8777.25	6982.57	4872.35	4030.76	6574.29	6811.1
201892_s_at	IMPDH2	873.09	1018.43	1966.85	951.85	820.94	878.01	511.73	908.3	1488.88	1057.97	403.83	1043.58	753.82	1105.47	1300.64	1214.74	1419.84	451.08	895.05	1505.57	1741.46	1581.92	730.12	1007.98	754.25	1048.98	841.47	626.53	522.31	619.59	1589.61	915.4	795.47	1128.25	687.22	537.03	1134.56	1306.55	1011.64	1154.04	554.11	416.27	755.23	788.78	1712.35	1530.66	724.33	977.59
201893_x_at	DCN	1297.12	1373.81	1157.94	2787.94	1179.28	1091.61	745.52	819.94	1857.56	733.59	3655.46	1187.45	2515.36	4207.95	2574.56	889.81	1339.17	1696.5	979.06	2039.98	1643.37	715.76	2691.3	2330.57	917.34	1401.02	3301.86	3303.29	1855.29	1681.79	1611.25	2304.53	2706.19	7209.34	3035.27	1907.56	3363.14	2927.22	310.16	1554.31	292.27	2534.13	2601.39	512.98	1204.7	1371	4021.98	1257.87
201894_s_at	DCN	840.58	636.58	566.07	565.65	483.84	582.09	518.19	397.23	324.06	529.12	573.01	783.99	527.11	511.3	396.3	689.54	528.36	578.9	683.1	698.56	686.39	1085.9	515.14	348.72	621.42	795.06	540.33	648.96	405.42	604.46	570.14	437.92	764.19	406.54	478.4	573.57	566.35	376.71	280	644.34	435.58	911.97	715.9	499.36	262.3	309.29	695.99	709.93
201895_at	ARAF1	224.19	263.48	137.73	290.84	399.79	306.95	200.25	271.01	173.12	123.16	276.24	357.32	233.21	303.85	384.66	364.01	322.38	170.71	908.66	286.28	184.9	217.44	240.57	204.75	370.84	168.69	225.38	265.95	194.78	202.38	192.99	540.94	285.65	291.64	211.76	291.18	376.16	260.24	196.32	178.68	283.33	269.92	206.18	435.16	150.04	241.59	219.48	329.12
201898_s_at	UBE2A	346.78	181.84	206.69	603.36	376.5	592.78	264.09	321.15	322.25	190.49	337.5	197.58	405.99	206.35	244.29	463.83	374.65	288.37	235.59	456.8	225.37	338.84	217.35	213.99	239.35	235.41	349.42	406.63	196.48	244.29	396.88	429.32	447.38	181.56	260.63	307.11	418.75	293.74	164.05	368.12	460.7	613.5	434.25	394.32	432.98	216.25	330.2	389.99
201899_s_at	UBE2A	616.16	277.58	339.09	794.53	699.82	728.87	444.84	406.35	444.43	230.69	536.82	416.38	580.61	409.46	600.16	738.49	521.24	556.56	348.51	383.65	497.39	527.32	301.67	357.64	354.22	423.58	486.77	751.09	384.05	352.24	644.98	691.39	680.02	353.68	429.08	467.39	589.05	454.65	422.97	594.32	411.81	611.74	533.86	510.53	683.59	476.31	370.26	419.67
201900_s_at	AKR1A1	868.53	423.07	568.63	476.59	605.38	423.06	491.85	337.46	571.14	564.69	740.2	528.58	490.51	520.99	571.04	646.75	481.2	430.49	544.21	690.85	638.98	566.81	493.99	432.25	990.1	754.87	564.93	876.78	649.55	561.56	283.89	922	479.32	609.28	271.38	601.27	478.44	461.75	337.2	579.29	408.59	514.18	643.26	483.36	630.45	800.16	506.85	629.86
201901_s_at	YY1	856.18	868.02	799.33	865.7	957.88	577.07	830.87	2008.06	1471.77	1300.81	800.25	1034.18	642.09	679.16	767.41	1032.75	910.44	1195.99	1066.87	740.76	967.34	1144.77	1472.28	1583.21	1588.54	1276.01	1180.06	455.85	928.15	733.95	949.2	1095.2	703.65	908.02	719.48	584.91	779.16	1003.67	1722.58	638.89	1716.47	898.34	517.78	740.35	1102.45	1172.4	591.34	939.22
201903_at	UQCRC1	664.1	770.24	743.95	553.06	979.73	1080.94	674.14	1040.93	695.24	707.52	524.02	516.77	566.76	596.22	1058.72	647.19	636.56	501.15	713.98	1004.43	1040.03	1150.1	864.98	895.89	660.96	611.38	617.82	785.27	539.33	716.42	739.21	634.69	485.32	609.4	665.74	527.43	1068.12	1172.19	290.82	751.95	790.23	582.36	508.51	729.42	998.44	484.86	572.95	608.35
201908_at	DVL3	355.76	390.33	471.9	432.81	371.03	395.42	574.72	547.31	189.1	271.21	266.64	714.42	532.07	362.27	400.89	548.25	480.59	368.65	291.19	258.45	264.19	537.93	249.08	339.62	449.19	455.84	201.28	387.16	744.17	263.4	659.31	365.9	393.69	372.85	398.52	434.53	440.39	525.28	182.13	311.29	546.42	763.24	206.27	335.21	288.91	307.53	266.18	373.08
201910_at	FARP1	425.35	479.75	596.07	243.5	227.62	198.04	204.47	582.78	264.45	224.75	356.16	521.9	371.14	447.29	381.49	145.87	400.46	350.05	1293.71	192.59	714.98	223.81	998.88	796.54	418.14	413.85	776.42	513.18	585.96	350.83	233.9	924.58	542.81	538.68	372.29	608.5	404	628.17	187.53	837.79	164.31	520.16	186.18	357.25	394.68	397.33	246.44	459.13
201912_s_at	GSPT1	452.6	286.04	415.61	558.29	465.35	823.92	419.51	335.04	552.22	748.7	372.14	271.01	557.73	168.77	367.91	473.68	490.67	514.92	926.58	840.76	389.15	423.35	291.3	273.11	406.22	365.8	357.13	524.34	401.97	376.93	650.84	503.36	530.5	225.12	223.52	338.58	362.87	263.12	213.17	402.21	1292.86	441.02	713.09	243.42	241.86	604.89	813.18	660.06
201913_s_at	COASY	270.54	246.8	334.25	217.79	319.51	213.71	246.82	289.52	187.25	169.39	168.35	227.12	243.84	240.95	204.96	266.76	180.36	187.16	182.77	259.58	293.23	324.84	341.93	140.44	270.17	327.98	324.59	244.54	200.28	186.51	312.07	571.3	264.93	186.73	192.37	206.48	310.17	265.35	295.56	102.08	344.57	241.07	400.38	296.18	366.38	175.52	346.33	420.31
201916_s_at	SEC63	453.3	404.24	741.85	621.75	236.97	570.2	462.91	490.91	283.74	388.74	620.86	586.04	369.93	429.89	354.18	428.64	593.17	606.5	558.99	935.4	419.56	1083.71	578.27	546.36	422.46	754.61	440.55	829.04	742.54	565.32	520.24	1333.12	812.2	633.1	608.36	422.1	696.85	428.13	373.07	517.26	646.44	1162.07	503.74	551.79	595.2	741.36	675.67	644.57
201919_at	FLJ10618	684.13	366.19	648.11	441.49	556.6	398.54	629.14	468.18	330.95	419.9	404.6	516.86	418.55	359.06	372.76	406.24	611.18	654.34	654.85	512.27	888.68	620.51	329.91	460.84	440.89	565.74	355.39	372.81	394.99	638.96	457.02	628.12	393.15	449.16	597.6	302.17	323.78	531.01	168.72	421.12	698.76	426.23	318.06	647.8	373.02	389.26	450.77	525.26
201920_at	SLC20A1	597.01	587.26	553.94	560.35	657.2	596.04	675.5	593.95	684.82	387.57	944.89	418.35	728.33	597.98	474.57	482.42	583.92	526.03	420.67	397.31	563.52	442.33	715.84	547.95	362.06	237.89	1440.12	574.7	688.4	534.14	442.6	667.3	318.36	555.76	684.43	420.45	721.47	784.39	586.7	528.58	913.86	1102.2	807.07	849.2	215.93	461.02	784.04	439.14
201921_at	GNG10	652.94	321.09	404.96	745.23	392.61	735.57	438.7	480.62	609.41	336.46	1249.07	716.78	403.7	825.44	449.51	398.52	229.64	578.38	346.43	523.32	542.03	650.27	454.31	488.16	279.86	623.41	466.39	646.86	429.24	499.22	651.21	343.9	624	440.78	439.12	1174.32	404.31	528.53	517.2	691.22	349.01	312.64	529.86	338.63	379.91	1123.66	703.44	351.68
201922_at	TINP1	786.71	915.99	1762.74	972.61	667.77	949.31	669.76	529.41	831.31	723.85	904.42	547.75	632.78	850.15	896.69	769.19	760.53	368.93	512.01	768.82	803.35	930.84	977.95	727.87	438.35	877.85	643.11	702.22	327.84	803.41	1165.9	486.69	827.91	770.23	752.2	705.24	469.05	762.26	1155.31	836.81	419.21	373.86	655.26	453.93	930.43	1517.82	720.9	572.87
201923_at	PRDX4	701.66	599.75	2661.91	956.15	866.57	1333.74	539.9	886.77	652.62	481.86	1013.42	759.39	666.57	695.4	750.54	712.91	828.25	602.39	421.36	755.64	778.58	843.25	325.47	543.04	508.1	819.44	821.1	784.93	552.72	681.58	1204.7	838.69	1922.84	403.14	332.21	1477.46	760.25	516.48	328.71	1026.75	713.19	2109.47	745.52	1311.79	1104.58	872.29	732.52	665.6
201924_at	MLLT2	373.66	403.32	274.02	339.6	311.63	452.57	566.16	618	695.78	374.39	802.11	455.85	629.36	596.05	348.22	647.99	300.67	407.63	267.95	599.18	465.53	386.31	337.02	331.06	739.48	247.72	768.51	643.65	629.44	516.39	468.57	444.58	375.81	658.6	394.66	512.1	407.5	979.03	405.7	389.47	286.35	301.57	774.29	278.06	356.3	649.26	584.03	849.23
201930_at	MCM6	1051.04	551.85	664.86	811.91	1385.45	511.63	634.15	1301.98	1474.07	862.45	594.35	439.73	534.61	315.8	1222.55	904.33	861.62	1267.85	1212.38	779.6	1264.81	1012.33	1082.47	523.55	581.47	811.14	493.47	536.33	1038.17	1349.93	548.55	827.18	310.21	424.72	1130.05	668.18	719.7	750.29	466.72	544.55	1184.62	1352.87	690.89	923.86	872.47	546.43	955.94	876.88
201931_at	ETFA	305.28	216	210.2	711.91	261.24	574.17	184.82	332.35	431.2	814.22	460.42	243.04	251.59	239.05	422.09	161.95	201.21	221.25	140.73	203.43	410.85	281.34	214.32	212.64	263.84	205.83	1136	598.8	232.96	451.88	196.07	812.53	300.04	368.64	240.27	395.31	262.37	242.4	234.45	421.31	185.67	163.25	494.81	212.6	597.56	282.94	391.11	266.13
201932_at	MUF1	258.66	275.04	353.58	285.71	463.84	270.67	199.08	298.88	177	393.76	262.18	256.83	338.26	223.37	265.44	449.62	316.14	374.85	262.3	367.96	246.59	374.33	276.2	334.43	606.87	339.54	188.77	340.88	206.16	226.51	278.52	372.36	311.77	276.39	362.62	256.36	313.09	158.37	128.67	293.87	238.7	534.65	248.19	259.82	413.61	250.42	198.65	339.61
201933_at	PCOLN3	217.64	245.43	248.13	260.52	456.36	238.55	219.48	344.35	233.98	197.85	185.85	257.04	246.34	226.14	342.39	268.34	224.21	176.14	295.05	306.95	209.74	165.55	221.24	208.27	229.84	195.03	184.4	301.22	230.3	321.56	205.58	289	283.06	208.03	192.04	263.69	282.93	193.28	221.42	209.58	165.74	426.49	174.2	187.85	263.5	161.59	341.96	319.94
201934_at	PRO2730	609.94	939.11	1056.26	777.23	770.51	612.66	1101.06	500.4	633.68	572	965.07	777.27	676.2	860.71	1171.46	879.89	621.82	681.56	785.68	785.62	1021.87	1195.29	843.9	1047.32	873.55	527.03	516.81	792.2	968.84	770.81	1071.95	888.08	762.84	1027.69	784.26	629.3	871.78	1035.5	791.26	938.65	871.54	907.31	951.15	736.16	770.02	403.33	823.3	721.3
201935_s_at	EIF4G3	153.06	154.42	386.27	235.8	146.74	289.08	206.82	317.38	319.23	392.5	254.9	179.63	207.02	277.79	176.94	164.51	224.29	212.04	143.13	192.83	348.89	353.39	482.56	297.49	344.37	215.42	231.05	195.72	243.73	231.29	244.75	187.93	244.07	247.23	360.04	183.13	186.03	196.67	682.97	238.39	326.42	108.03	263.96	215.68	451.2	281.25	219.51	311.95
201938_at	CDK2AP1	2934.87	2147.65	1607.3	3993.92	2914.47	3169.49	2379.68	4650.99	1074.11	2116.69	1750.3	2840.72	5143.9	1662.49	2548.45	2053.31	3815.82	2532.39	2576.9	2038.66	1744.12	2994.23	2154.09	2753.44	2115.14	3246.15	1601.96	1943.79	1207.7	4674.27	2840.45	3416.54	3217.32	1632.44	3113.85	1720.88	1804.75	1959.53	247.77	2928.93	2613.77	2635.66	2668.15	2416.67	2218.85	2029.94	3011.4	1545.4
201944_at	HEXB	989.18	689.73	712.11	901.19	1092.67	646.78	833.34	593.22	1166.67	718.89	1677.15	774.63	854.28	911.36	1270.91	790.2	779.45	809.04	812.63	1103.96	850.14	738.96	701.78	608.83	470.44	762	819.5	784.59	1363.45	979.89	1260.49	897.78	946.3	892.92	854.14	914.98	897.75	873.12	438.28	935.21	517.55	982.97	1114.74	581.52	802.57	992	895.97	619.55
201947_s_at	CCT2	1594.75	1212.43	1845.92	1559.24	1637.87	2238.12	1178.04	1702.17	1527.45	1662.32	945.74	1588.03	1856.79	907.44	1197.31	1253.24	1998.89	945.27	1098.04	805.72	2930.89	2329.92	1518.24	1747.74	1452.65	1041.75	1191.57	1307.39	984.86	1281.41	1826.19	895.16	913.31	1184.05	1437.55	962.84	1236.61	1084.09	804.79	1462.61	2318.76	1201.99	1488.69	3668.5	2256.42	1491.63	6898.49	1311.28
201948_at	HUMAUANTIG	335.53	234.9	650.36	257.98	279.1	369.81	247.4	355.95	494.41	543.64	271.06	271.41	254.86	147.37	147.03	344.7	302.81	444.86	232.97	175.07	583.7	507.04	434.95	420.79	433.55	185.03	252.16	227.57	193.17	219.45	265.22	374.48	225.02	140.77	225.53	262.1	194.19	450.07	166.52	307.21	345.3	194.7	302.73	451.6	385.75	183.49	312.41	218.36
201949_x_at	CAPZB	629.8	697.54	630.12	697.65	582.67	922.07	655.6	438.13	456.46	499.96	837.77	622.57	536.6	816.06	674.73	573.75	460.79	499.81	566.05	430.04	737.31	506.7	571.11	708.98	762.88	550.16	635.15	747.46	568.77	670.88	426.73	651.57	538.87	604.34	639.65	616.32	703.54	512.03	778.9	771.73	631.2	726.07	464.83	508.99	587.78	513.12	492.78	578.58
201950_x_at	CAPZB	1017.32	807.03	750.49	1054.55	929.08	1453.25	776.89	536.32	680.78	804.97	1221.9	770.33	822.03	1120.46	1149.26	868.07	849.54	604.55	865.65	913.67	772.56	699.7	695.77	932.19	1080.16	550.39	812.86	1136.5	672.74	1068.15	730.51	960.35	951.44	971.6	1088.55	1062.37	1270.39	687.19	684.02	1109.22	1026.38	1073.01	765.72	647.3	820.62	589.1	892.61	1050.51
201953_at	CIB1	395.46	269.38	177.83	480.73	364.73	558.38	497.28	569.31	380.36	348.4	379.89	169.13	307.96	419.5	522.27	356.25	238.67	228.95	245.53	421.26	464.74	226.27	202.08	155.39	451.71	272.78	914.8	5016.73	233.22	428.32	227.7	398.56	288.38	464.98	209.14	610.03	425.74	776.67	591.29	437.47	104.45	389.16	458.42	344.71	1215.66	574.74	577.85	493.45
201954_at	ARPC1B	1166.52	1227.84	537.14	1384.07	1058.84	1702.77	1349.57	1046.65	1707.6	870.54	1545.79	1005.42	686.15	1358.5	1542.54	1594.6	1490.82	1580.51	1024.35	811.07	725.27	397.84	1307.43	2665.35	1300.73	1212.4	1979.58	1107.8	1295.95	1167.6	892.9	2841.92	2036.97	800.88	702.78	1021.28	1802.44	747.88	1806.36	515.09	471.42	1213.55	1029.49	602.07	895.16	1110.59	802.76	913.03
201955_at	CCNC	697.99	447.56	706.87	755.5	231.22	820.95	352.03	496.54	658.29	552.74	625.17	438.09	313.15	373.27	211.5	326.99	364.87	482.88	435.63	974.31	439.3	1491.81	785.45	448.6	397.91	825.16	471.34	686.43	503.57	545.72	506.5	1351.8	696.25	287.56	424.33	441.07	304.69	375.92	218.24	746.09	639.12	745.88	418.23	741.08	877.66	768.41	585.31	498.16
201956_s_at	GNPAT	709.37	512.71	402.11	560.2	462.12	528.42	505.83	401.92	515.62	443.8	515.77	673.92	382.81	356.32	770.83	385.03	887.52	739.92	400.63	450.92	562.19	453.17	385.64	474.48	591.37	652.35	504	440.54	538.65	459.84	730.76	549.23	759.01	384.12	607.05	725.42	499.08	485.42	401.29	412.19	564.74	253.53	573	652.99	413.92	504.16	436.68	549.31
201959_s_at	MYCBP2	388.11	701.24	619.19	334.59	336.01	319.51	779.06	775.45	1035.28	458.46	883.9	426.47	347.72	785.76	476.43	676.24	335.02	604.2	402.2	303.39	548.49	509.46	824.95	901.02	1022.77	815.02	622.64	635.55	626.64	461.32	317.08	556.81	550.97	694.94	376.13	483.32	430.23	393.5	2908.75	342.62	201.4	394.06	657.6	556.51	347.45	592.74	260.63	300.05
201960_s_at	MYCBP2	397.59	665.43	647.12	446.89	332.34	404.23	716.05	474.84	811.89	314.62	952.04	373.15	358.63	616.61	452.22	686.08	374.22	429.83	349.68	359.7	670.21	609.76	588	548.03	630.98	627.09	550.19	848.23	581.91	523.91	352.98	439.62	477.48	697.65	385.75	527.08	438.69	394.35	2001.41	389.5	138.7	345.03	575.85	653.18	289.74	508.75	310.94	308.25
201964_at	KIAA0625	191.63	169.49	149.24	145.61	190.66	165.76	295.08	157.75	261.71	146.71	419.86	190.29	215.09	304.06	228.75	249.76	137.68	171.62	133.36	147.2	222.52	328.6	265.99	141.79	169.51	129.34	202.85	192.04	263.2	239.77	182.02	187.35	192.63	293.17	296.76	176.37	252.11	260.11	426.28	149.54	141.67	305.02	267.48	239.86	178.66	197.36	240.51	199.87
201966_at	NDUFS2	1043.3	1064.81	753.16	1025.15	1052.74	857.8	823.84	616.36	734.13	930.5	728.73	669.71	576.29	463.52	968.63	1890.82	1145.6	986.12	919.9	812.83	856.49	823.54	571.39	551.51	808.01	902.8	1215.54	743.84	624.63	656.14	1518.04	741.77	1084.76	578.2	1028.88	1150.47	859.07	754.19	350.08	720.41	478.6	478.21	871.97	1247.08	939.41	824.99	571.3	782.89
201967_at	RBM6	224.93	337.64	270.73	343.85	259.53	209.34	401.84	253.01	255.05	197.9	298.84	310.91	218.76	692.02	297.67	296.6	306.2	229.04	245.15	211.97	435.12	273.72	271.05	294.91	274.77	162.59	198.03	276.96	228.19	211.22	287.87	391.62	308.74	412.96	239.63	210.16	295.7	345.25	708.7	280.05	355.15	227.27	262.37	264.11	231.39	204.98	142.13	143.05
[truncated: 26,170 more rows]
[truncated: 18 more columns]

## Sheet: Suppl Table 2
Suppl. Table 2: List of probe sets included in the 14 gene clusters shown in Figure 1
Probe Set ID	Cluster Figure 1	Gene Symbol	Gene Name	RefSeq Transcript ID	Chrom . Loc.
224733_at	Stromal	CKLFSF3	chemokine-like factor super family 3	NM_144601 /// NM_181553 /// NM_181554 /// NM_181555	16q22.1
[truncated: 2,536 more rows]

## Sheet: Suppl Table 3
Suppl. Table 3: List of 534 probe sets significantly differentially expressed between medullary and ductal basal breast cancers. Probe sets are ordered according to decreasing DS (discriminating score).
[truncated: 535 more rows]

[truncated: 1 more sheets: Suppl Table 4]
