# Supplementary figures and images for: Gene Expression Profiling Shows Medullary Breast Cancer Is a Subgroup of Basal Breast Cancers
Source: Oxford University Press journal article supplement (doi:10.1158/0008-5472.can-06-0031), 2006-05-01

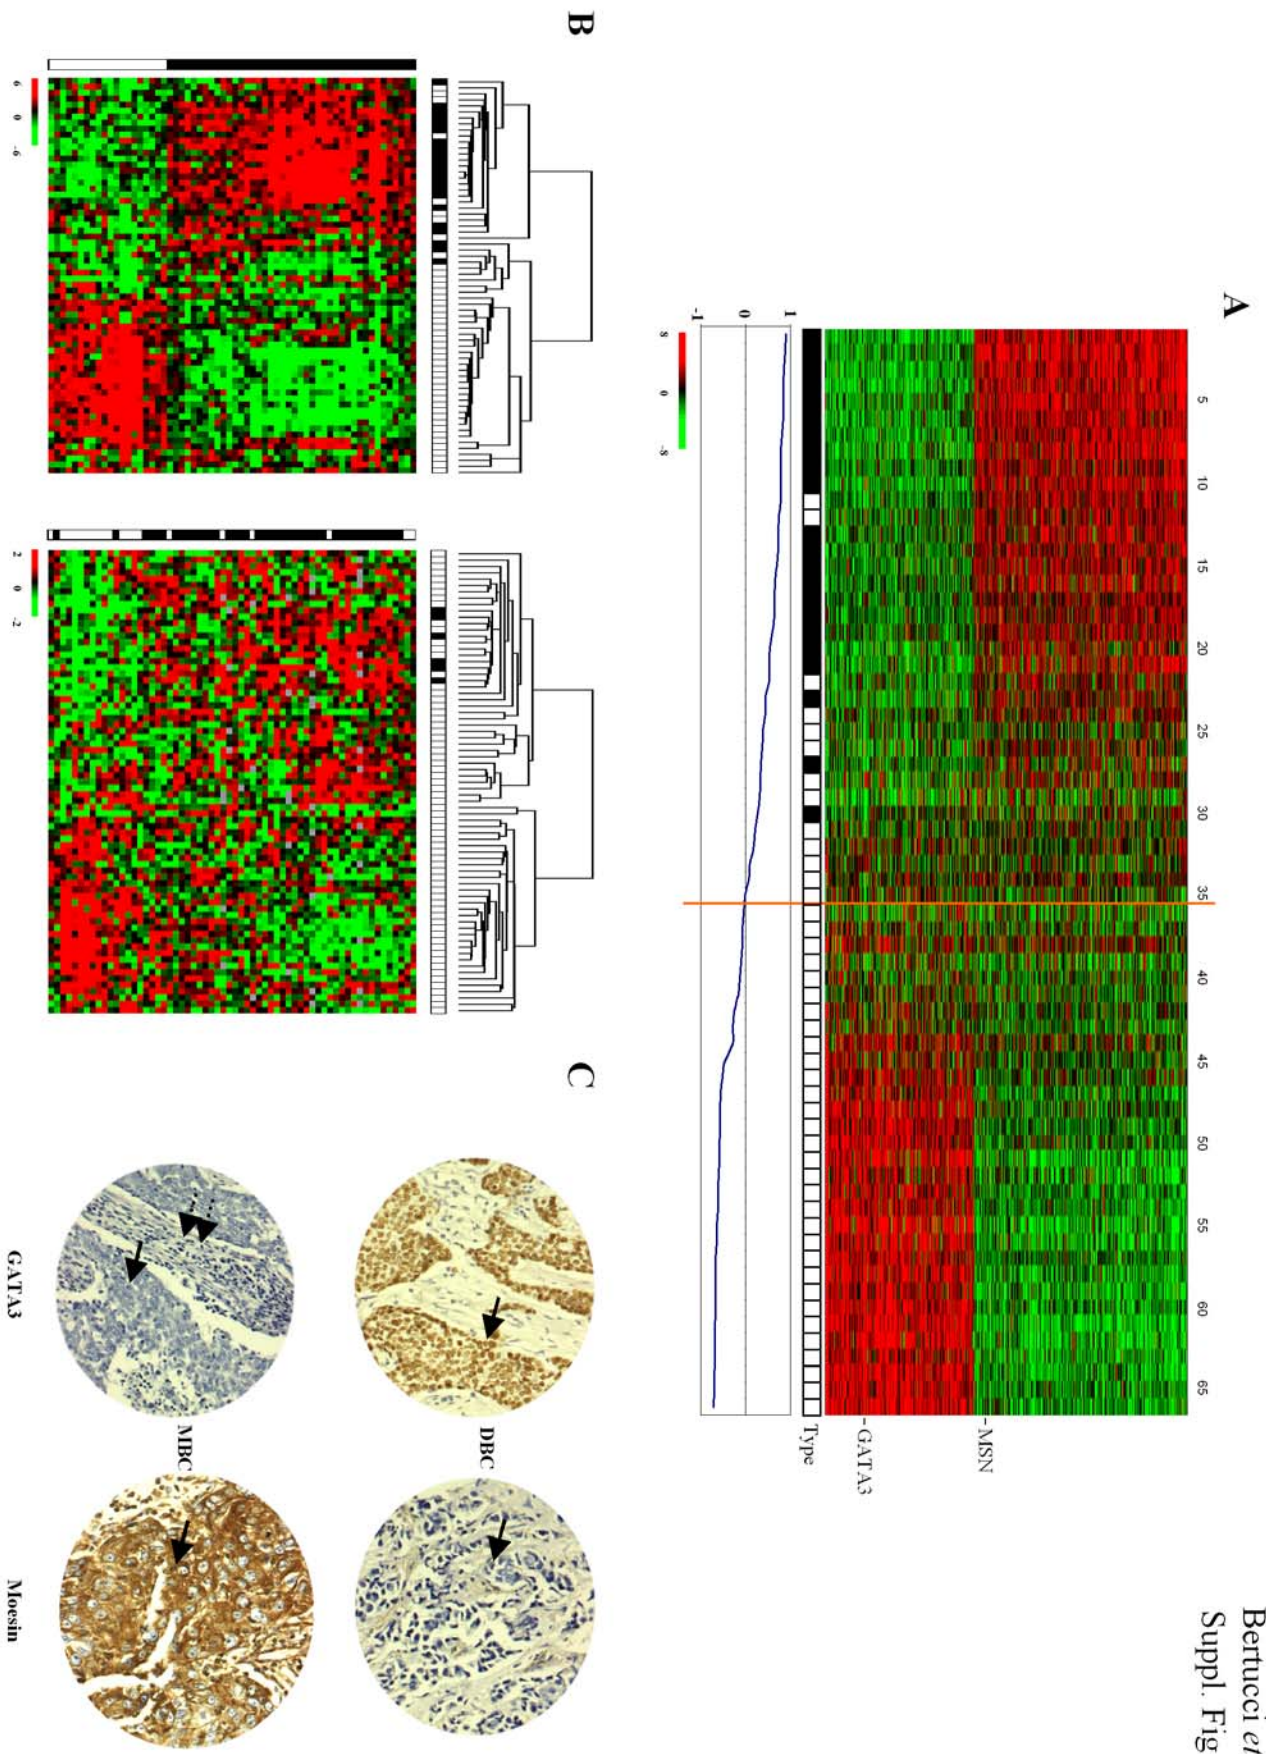

Supplement: 00085472can060031-sup-supplementary_figure_2.pdf [file 00085472can060031-sup-supplementary_figure_2.pdf]
